# Supplementary material for: Complete genome of Enterobacter sichuanensis strain SGAir0282 isolated from air in Singapore
Source: Gut Pathog. 2020 Feb 27;12:12. doi: 10.1186/s13099-020-00350-z (PMC7045367; doi:10.1186/s13099-020-00350-z)
Supplement: Supplementary file 1 — Additional file 1. The variant call was performed by kSNP3. Dataset used here was defined in the method section. Strain SGAir0282 was used as reference genome. [file 13099_2020_350_MOESM1_ESM.vcf]

##fileformat=VCFv4.0
##Reference genome=EcloacaeSGAir0282
##INFO=<ID=NS,Number=1,Type=Integer,Description="Number of Samples With Data">
##INFO=<ID=AF,Number=.,Type=Float,Description="Allele Frequency">
#CHROM	POS	ID	REF	ALT	QUAL	FILTER	INFO	FORMAT	EasburiaeATCC35953	EasburiaeCAV1043	EasburiaeENIPBJ_CG1	Ebugandensis220	EbugandensisEB_247	EcancerogenusCR_Eb1	EchengduensisWCHECl-C4	EcloacaeA1137	EcloacaeCZ_1	EcloacaeMBRL1077	EcloacaeSGAir0282	EkobeiC16	EkobeiDSM13645	EkobeiEB_P8_L5_0119	EkobeiWCHEK045523	EludwigiiAA4	EludwigiiEN-119	EludwigiiEcWSU1	EludwigiiI140	EludwigiiI42	EludwigiiJP6	EludwigiiJP9	EludwigiiP101	EludwigiiUW5	EnterobacterODB01	EroggenkampiiDSM16690	EroggenkampiiECY546	EroggenkampiiFDAARGOS_523	EsichuanensisWCHECL1597	LadecarboxylataUSDA_ARS_USMARC_60222
1	1741115	AAAAAAAAC.ACTTCAGAT_R	G	C	.	.	NS=2;AF=0.033	GT	.	.	.	.	.	.	1	.	.	.	0	.	.	.	.	.	.	.	.	.	.	.	.	.	.	.	.	.	.	.
1	4666123	AAAAAAAAC.CGGATAGAA_R	T	C	.	.	NS=3;AF=0.033	GT	.	.	.	.	.	.	1	.	.	.	0	.	.	.	.	.	.	.	.	.	.	.	.	.	.	.	.	.	0	.
1	1555111	AAAAAAAAC.GCGTTAACC_F	C	T	.	.	NS=27;AF=0.033	GT	0	0	0	0	0	.	1	0	0	.	0	0	0	0	0	0	0	0	0	0	0	0	0	0	0	0	0	0	0	.
1	3397812	AAAAAAAAC.TGCATACAA_R	T	C	.	.	NS=27;AF=0.067	GT	0	0	.	1	1	0	0	0	0	0	0	0	.	0	0	0	0	0	0	0	0	0	0	0	0	0	0	0	0	.
1	917077	AAAAAAAAC.TTATCAAAG_R	C	T	.	.	NS=3;AF=0.033	GT	.	.	.	.	.	.	.	.	.	1	0	.	.	.	.	.	.	.	.	.	.	.	.	.	.	.	.	.	0	.
1	4567965	AAAAAAAAC.TTCAACCGT_F	G	T	.	.	NS=27;AF=0.467	GT	1	1	.	1	1	0	1	0	.	1	0	1	1	1	1	0	0	0	0	0	0	0	0	0	1	1	1	1	0	.
1	2705328	AAAAAAAAT.GAGACAGGT_F	A	T	.	.	NS=5;AF=0.033	GT	.	.	.	1	.	.	.	0	.	.	0	.	.	.	.	.	.	.	.	.	.	.	.	.	.	.	0	.	0	.
1	4453438	AAAAAAAAT.TTGTCGAAT_F	C	T	.	.	NS=29;AF=0.033	GT	0	0	0	0	0	1	0	0	0	0	0	0	0	0	0	0	0	0	0	0	0	0	0	0	0	0	0	0	0	.
1	292508	AAAAAAACA.AACCCCCGG_R	T	C	.	.	NS=13;AF=0.033	GT	0	.	.	.	.	1	0	0	.	0	0	0	0	0	0	.	.	.	.	.	.	.	.	.	0	.	.	.	0	0
1	970252	AAAAAAACA.CCAAACGCG_F	G	T	.	.	NS=2;AF=0.033	GT	1	.	.	.	.	.	.	.	.	.	0	.	.	.	.	.	.	.	.	.	.	.	.	.	.	.	.	.	.	.
1	2653053	AAAAAAACC.AAAAAAAAG_F	A	C	.	.	NS=2;AF=0.033	GT	.	.	.	.	.	.	.	.	.	.	0	.	.	.	.	.	.	.	.	.	.	.	.	.	.	.	.	1	.	.
1	2263019	AAAAAAACC.CGAAATAAT_F	G	A	.	.	NS=5;AF=0.067	GT	.	.	.	.	.	.	.	0	.	.	0	1	.	.	1	.	.	.	.	.	.	.	.	.	.	.	.	.	0	.
1	2881341	AAAAAAACC.GCCGAAGCA_F	T	C	.	.	NS=29;AF=0.667	GT	1	1	1	1	1	0	1	0	.	0	0	1	1	1	1	1	1	1	1	1	1	1	1	1	1	0	0	0	0	0
1	672790	AAAAAAACC.GCGTTAAGC_F	C	G	.	.	NS=24;AF=0.033	GT	0	.	0	0	0	0	0	0	0	0	0	.	.	.	.	.	0	0	0	0	0	0	0	0	1	0	0	0	0	0
1	2659823	AAAAAAACC.GCTTCGGCG_R	G	A	.	.	NS=10;AF=0.033	GT	.	.	.	.	.	0	.	0	0	0	0	.	.	.	.	.	.	.	.	.	.	.	.	.	1	.	0	0	0	0
1	1435855	AAAAAAACC.GGGAAAATC_F	A	G	.	.	NS=4;AF=0.033	GT	.	.	.	.	1	.	.	0	.	.	0	.	.	.	.	.	.	.	.	.	.	.	.	.	.	.	.	.	0	.
1	4513712	AAAAAAACG.GCAGATGCT_F	C	A	.	.	NS=13;AF=0.267	GT	.	.	.	.	.	0	.	0	0	.	0	.	.	.	.	1	.	1	1	1	1	1	1	1	.	.	.	.	0	.
1	4559227	AAAAAAACG.GCCCGTTAT_R	A	T	.	.	NS=2;AF=0.033	GT	.	.	.	.	.	.	.	1	.	.	0	.	.	.	.	.	.	.	.	.	.	.	.	.	.	.	.	.	.	.
1	2372546	AAAAAAACG.TCCTGGATC_R	C	T	.	.	NS=3;AF=0.033	GT	.	.	.	.	.	.	.	1	.	.	0	.	.	.	.	.	.	.	.	.	.	.	.	.	.	.	.	.	0	.
1	4528442	AAAAAAAGA.AGCCTGGCG_F	G	C	.	.	NS=3;AF=0.033	GT	.	.	.	.	.	.	.	0	1	.	0	.	.	.	.	.	.	.	.	.	.	.	.	.	.	.	.	.	.	.
1	1000048	AAAAAAAGA.ATCCTCTCA_R	G	A	.	.	NS=25;AF=0.300	GT	0	0	0	0	0	.	0	0	0	.	0	0	.	.	0	1	1	1	1	1	1	1	1	1	0	0	0	0	0	.
1	4013272	AAAAAAAGC.CCCGATTGG_R	A	T	.	.	NS=15;AF=0.033	GT	0	0	0	0	0	.	0	0	.	0	0	0	.	.	0	.	.	.	.	.	.	.	.	.	.	.	0	0	0	1
1	2824511	AAAAAAAGC.CCGCGGGTG_F	T	C	.	.	NS=24;AF=0.067	GT	0	0	0	1	1	0	0	0	0	0	0	.	.	.	.	0	0	0	0	0	0	0	0	0	.	0	0	0	0	.
1	1985166	AAAAAAAGG.ATTTATCAT_F	C	T	.	.	NS=11;AF=0.033	GT	0	0	0	.	.	.	1	0	0	.	0	.	.	.	.	.	.	.	.	.	.	.	.	.	.	0	0	0	0	.
1	2639454	AAAAAAAGG.CTTATCCTT_F	G	T	.	.	NS=4;AF=0.033	GT	.	1	.	.	.	.	.	0	.	.	0	.	.	.	.	.	.	.	.	.	.	.	.	.	.	.	.	.	0	.
1	1573897	AAAAAAAGG.GCAATGAAA_F	G	C	.	.	NS=16;AF=0.300	GT	.	.	.	.	.	.	0	0	.	.	0	.	.	.	.	1	1	1	1	1	1	1	1	1	.	0	0	0	0	.
1	474648	AAAAAAATA.CAGCCAGGT_F	A	G	.	.	NS=14;AF=0.033	GT	.	.	.	.	.	0	.	0	.	1	0	.	.	.	.	0	0	0	0	0	0	0	0	0	.	.	.	.	0	.
1	2005064	AAAAAAATA.CCCCGGACA_R	T	A	.	.	NS=2;AF=0.033	GT	.	.	.	.	.	.	.	.	.	.	0	.	.	.	.	.	.	.	.	.	.	.	.	1	.	.	.	.	.	.
1	592688	AAAAAAATA.CTCGGTCAG_R	G	A	.	.	NS=13;AF=0.033	GT	0	0	0	0	0	0	0	0	.	.	0	.	.	.	.	.	.	.	.	.	.	.	.	.	.	0	0	.	0	1
1	4040323	AAAAAAATA.GAGTGCGCG_R	A	G	.	.	NS=2;AF=0.033	GT	.	.	.	.	.	.	.	.	.	.	0	1	.	.	.	.	.	.	.	.	.	.	.	.	.	.	.	.	.	.
1	1056888	AAAAAAATA.TTGTTGTTT_R	A	T	.	.	NS=26;AF=0.033	GT	0	.	.	0	0	0	0	0	1	0	0	0	0	.	0	0	0	0	0	0	0	0	0	0	0	0	0	0	0	.
1	3327143	AAAAAAATC.ACCTGAATG_F	G	A	.	.	NS=18;AF=0.100	GT	0	0	0	1	1	.	.	0	0	1	0	.	.	.	.	0	.	0	0	0	0	0	0	0	.	.	.	.	0	.
1	2497172	AAAAAAATC.TGCCTGACG_F	A	C	.	.	NS=12;AF=0.033	GT	0	0	0	0	0	.	0	0	0	0	0	.	.	.	.	.	.	.	.	.	.	.	.	.	.	.	.	.	0	1
1	269093	AAAAAAATG.CGGCATATC_R	G	A	.	.	NS=8;AF=0.067	GT	.	.	.	0	0	.	.	0	0	0	0	.	.	.	.	.	.	.	.	.	.	.	1	.	.	.	.	.	0	.
1	1974365	AAAAAAATG.GTGCCGTTA_R	A	G,T	.	.	NS=21;AF=0.300,0.033	GT	0	.	.	0	0	.	0	2	0	0	0	.	.	.	.	1	1	1	1	1	1	1	1	1	.	0	0	0	0	.
1	655230	AAAAAAATT.GCCGAGTAA_F	G	A	.	.	NS=21;AF=0.133	GT	.	.	.	0	0	.	.	0	0	0	0	1	1	1	1	.	0	0	0	0	0	0	0	0	.	.	0	0	0	.
1	2692358	AAAAAAATT.GCCGATTCA_F	T	G	.	.	NS=5;AF=0.100	GT	.	.	.	.	.	.	.	0	.	.	0	1	1	.	.	.	.	.	.	.	.	.	.	.	1	.	.	.	.	.
1	3075951	AAAAAACAA.ACCTTCTGC_R	C	T	.	.	NS=23;AF=0.433	GT	0	.	.	0	0	.	0	.	.	1	0	0	0	0	0	1	1	1	1	1	1	1	1	1	0	1	1	1	.	.
1	1124347	AAAAAACAA.ATTTCTTTC_R	G	A	.	.	NS=17;AF=0.100	GT	0	0	0	1	1	.	.	0	.	1	0	0	0	0	0	.	.	.	.	.	.	.	.	.	0	0	0	0	0	.
1	980333	AAAAAACAA.CTGCGCGCC_R	C	T	.	.	NS=6;AF=0.033	GT	.	.	.	.	.	.	.	0	.	1	0	.	.	.	.	.	.	.	.	.	.	.	.	.	.	0	.	0	0	.
1	3112816	AAAAAACAA.GTTGAAAGC_R	G	A	.	.	NS=3;AF=0.033	GT	.	.	.	.	.	.	.	0	1	.	0	.	.	.	.	.	.	.	.	.	.	.	.	.	.	.	.	.	.	.
1	2706107	AAAAAACAA.TCATCAGAA_F	T	C	.	.	NS=4;AF=0.100	GT	.	.	.	.	.	.	.	1	.	.	0	.	.	.	.	.	.	.	.	.	.	.	.	.	.	.	1	.	1	.
1	2677397	AAAAAACAA.TCCAGAAAA_F	C	T	.	.	NS=2;AF=0.033	GT	.	.	.	.	.	.	1	.	.	.	0	.	.	.	.	.	.	.	.	.	.	.	.	.	.	.	.	.	.	.
1	984905	AAAAAACAC.GCACAAAAT_F	C	T	.	.	NS=3;AF=0.033	GT	.	.	.	.	.	.	.	1	.	.	0	.	.	.	.	.	.	.	.	.	.	.	.	.	.	.	.	.	0	.
1	3192910	AAAAAACAC.GCCGAAGCA_R	A	G	.	.	NS=23;AF=0.433	GT	0	0	0	1	1	0	.	0	1	1	0	.	.	.	.	1	1	1	1	1	1	1	1	1	.	0	0	0	0	.
1	957653	AAAAAACAG.AAGGGTTTT_F	G	A	.	.	NS=28;AF=0.333	GT	1	0	0	0	0	0	0	0	0	0	0	.	0	0	0	1	1	1	1	1	1	1	1	1	0	0	.	0	0	0
1	2956531	AAAAAACAG.ATAGATTCT_F	G	A	.	.	NS=2;AF=0.033	GT	.	.	.	.	.	.	.	1	.	.	0	.	.	.	.	.	.	.	.	.	.	.	.	.	.	.	.	.	.	.
1	2515492	AAAAAACAG.CAGGTCAGG_R	A	G	.	.	NS=5;AF=0.100	GT	1	1	1	.	.	.	.	.	.	.	0	.	.	.	.	.	.	.	.	.	.	.	.	.	.	.	.	.	0	.
1	2518957	AAAAAACAG.CAGGTCAGG_R	A	G	.	.	NS=5;AF=0.100	GT	1	1	1	.	.	.	.	.	.	.	0	.	.	.	.	.	.	.	.	.	.	.	.	.	.	.	.	.	0	.
1	1481760	AAAAAACAG.CCCATCACC_F	C	T	.	.	NS=17;AF=0.067	GT	0	0	0	0	0	.	0	0	.	0	0	0	0	0	0	.	.	.	.	.	.	.	.	.	0	1	.	1	0	.
1	2061924	AAAAAACAG.CGTTTGACA_F	G	A	.	.	NS=13;AF=0.033	GT	.	.	.	0	0	1	.	0	0	0	0	0	0	0	0	.	.	.	.	.	.	.	.	.	0	.	.	.	0	.
1	2279902	AAAAAACAG.GTGGCGGCG_F	T	C	.	.	NS=3;AF=0.033	GT	.	.	.	.	.	.	.	1	.	.	0	.	.	.	.	.	.	.	.	.	.	.	.	.	.	.	.	.	0	.
1	2894244	AAAAAACAG.TCTCAAATT_F	T	A	.	.	NS=5;AF=0.067	GT	.	1	1	.	.	.	.	0	.	.	0	.	.	.	.	.	.	.	.	.	.	.	.	.	.	.	.	.	0	.
1	1653864	AAAAAACAT.CCTGAGCTG_F	G	T	.	.	NS=7;AF=0.167	GT	1	1	1	1	.	.	.	.	.	1	0	.	.	.	.	.	.	.	.	.	.	.	.	.	.	.	.	.	0	.
1	3197305	AAAAAACAT.CTGATGAAC_R	T	C	.	.	NS=24;AF=0.100	GT	.	.	.	1	1	.	.	0	0	1	0	0	0	0	0	0	0	0	0	0	0	0	0	0	0	0	0	0	0	.
1	4599535	AAAAAACAT.CTGATGATC_F	T	C	.	.	NS=16;AF=0.033	GT	.	1	0	.	.	0	.	0	0	.	0	.	.	.	.	0	0	0	0	0	0	0	0	0	.	.	.	.	0	.
1	3604461	AAAAAACAT.TCGCTTTTC_R	T	C	.	.	NS=19;AF=0.533	GT	.	1	1	.	.	.	1	0	0	.	0	1	.	.	1	1	1	1	1	1	1	1	1	1	1	.	.	.	.	1
1	2919672	AAAAAACCA.ATGCCGAGC_F	G	A	.	.	NS=28;AF=0.100	GT	0	0	0	0	0	.	0	0	0	0	0	0	0	0	0	0	0	0	0	0	0	0	0	0	0	1	1	1	0	.
1	3814605	AAAAAACCA.CCGGTCGAT_F	G	A	.	.	NS=13;AF=0.033	GT	0	0	0	.	.	.	0	0	.	.	0	0	0	0	0	.	.	.	.	.	.	.	.	1	0	.	.	.	0	.
1	2380139	AAAAAACCA.GCCACGCTC_R	A	G	.	.	NS=13;AF=0.033	GT	.	.	.	.	.	.	.	0	.	1	0	.	.	.	.	0	0	0	0	0	0	0	0	0	.	.	.	.	0	.
1	1863366	AAAAAACCA.GTTAAAAAG_F	T	C	.	.	NS=2;AF=0.033	GT	.	.	.	.	.	.	.	.	.	.	0	.	.	.	.	.	.	.	.	.	.	.	.	.	.	.	.	.	.	1
1	2981438	AAAAAACCC.ATGACGCTG_R	C	G	.	.	NS=2;AF=0.033	GT	.	.	.	.	.	.	.	.	.	.	0	.	.	.	.	.	.	.	.	.	.	.	.	.	.	.	.	.	1	.
1	3039003	AAAAAACCC.GCAACATGG_F	G	C	.	.	NS=6;AF=0.033	GT	.	.	.	.	.	.	.	0	.	.	0	.	.	0	.	.	.	.	.	.	.	.	0	.	.	.	.	.	0	1
1	3039014	AAAAAACCC.GCCATGTTG_R	C	G	.	.	NS=6;AF=0.033	GT	.	.	.	.	.	.	.	0	.	.	0	.	.	0	.	.	.	.	.	.	.	.	0	.	.	.	.	.	0	1
1	1553731	AAAAAACCC.TCAACAAGA_R	C	A	.	.	NS=28;AF=0.033	GT	0	0	.	0	0	.	0	0	0	0	0	0	0	0	0	0	0	0	0	0	0	0	0	0	0	0	0	0	0	1
1	4508173	AAAAAACCG.AAGAGCCAA_R	G	C	.	.	NS=10;AF=0.233	GT	.	1	.	1	.	.	.	0	1	1	0	.	.	.	.	.	.	.	.	.	.	.	.	.	.	1	1	1	0	.
1	2606852	AAAAAACCG.ACCCTGATT_F	A	G	.	.	NS=12;AF=0.067	GT	.	0	0	1	1	.	0	0	.	0	0	.	.	.	.	.	.	.	.	.	.	.	.	.	.	0	0	0	0	.
1	3844944	AAAAAACCG.ATTCAGGAC_R	A	G	.	.	NS=29;AF=0.067	GT	0	0	0	0	0	1	0	0	0	0	0	0	0	0	0	0	0	0	0	0	0	0	0	0	0	0	0	0	.	1
1	4207200	AAAAAACCG.CGCTTTTGG_F	A	G	.	.	NS=28;AF=0.100	GT	0	0	0	1	1	.	0	0	0	1	0	0	0	0	0	0	0	0	0	0	0	0	0	0	0	0	0	0	0	.
1	2617356	AAAAAACCG.TAACCGATC_R	C	T	.	.	NS=3;AF=0.033	GT	.	.	.	.	.	.	.	0	.	.	0	.	.	.	.	.	.	.	.	.	.	.	.	.	.	.	.	.	1	.
1	3380305	AAAAAACCG.TCTCTGCCC_R	A	G	.	.	NS=6;AF=0.033	GT	.	.	.	.	.	.	.	0	.	.	0	.	.	.	.	.	.	.	.	.	.	.	.	.	.	1	0	0	0	.
1	812201	AAAAAACCG.TGAGCGTGG_F	T	C	.	.	NS=3;AF=0.033	GT	.	.	.	.	.	.	.	1	.	.	0	.	.	.	.	.	.	.	.	.	.	.	.	.	.	.	.	.	0	.
1	3334456	AAAAAACCT.GGTTTTGCG_R	G	A,C	.	.	NS=10;AF=0.200,0.033	GT	.	.	.	.	.	.	.	0	.	.	0	.	.	.	.	2	1	.	1	1	1	1	.	1	.	.	.	.	0	.
1	4666285	AAAAAACCT.TCTTATGTG_F	C	G	.	.	NS=6;AF=0.100	GT	.	.	.	.	.	.	.	0	.	.	0	.	.	.	.	.	.	.	.	.	.	.	.	.	.	1	1	1	0	.
1	3937088	AAAAAACGA.GCGCCAAAA_R	A	G	.	.	NS=7;AF=0.100	GT	0	1	1	.	.	.	.	1	.	.	0	.	.	.	.	.	.	.	.	.	.	.	.	.	.	.	0	.	0	.
1	2466227	AAAAAACGC.CTTCGCCAC_F	A	G	.	.	NS=14;AF=0.400	GT	.	.	.	.	.	.	.	1	.	.	0	.	.	.	.	1	1	1	1	1	1	1	1	.	.	1	1	1	0	.
1	3070685	AAAAAACGC.GGTTCAAAA_F	C	G	.	.	NS=13;AF=0.033	GT	.	.	.	.	.	1	.	0	.	.	0	.	.	.	.	0	0	0	0	0	0	0	0	0	.	.	.	.	0	.
1	2398818	AAAAAACGC.GGTTGGGTT_R	G	C	.	.	NS=8;AF=0.167	GT	1	.	.	.	.	.	.	0	.	.	0	1	1	.	1	.	.	.	.	.	.	.	.	.	1	.	.	.	0	.
1	4545511	AAAAAACGC.TGCGTATTC_F	C	T	.	.	NS=18;AF=0.033	GT	0	0	0	.	.	0	.	0	.	.	0	.	.	.	.	0	.	1	0	0	0	0	0	0	.	0	0	0	0	.
1	1894961	AAAAAACGG.AACAGCGGC_F	G	A	.	.	NS=7;AF=0.033	GT	.	.	.	.	.	.	.	1	.	.	0	0	0	0	0	.	.	.	.	.	.	.	.	.	0	.	.	.	.	.
1	2865525	AAAAAACGG.AACCTGGGT_F	C	T	.	.	NS=12;AF=0.100	GT	1	.	.	0	1	.	.	0	.	.	0	0	0	0	0	.	.	.	.	.	.	.	.	.	0	.	.	.	0	1
1	2435084	AAAAAACGG.ACAAAGACG_F	C	A	.	.	NS=5;AF=0.033	GT	.	.	.	.	.	.	0	0	.	.	0	.	.	.	.	.	.	.	.	.	.	.	.	.	.	.	.	.	0	1
1	1431095	AAAAAACGG.GCTGGAAAA_R	A	C	.	.	NS=21;AF=0.033	GT	0	0	0	.	.	.	0	0	0	0	0	.	.	.	.	0	0	0	0	0	0	0	0	0	.	0	0	0	.	1
1	3851091	AAAAAACTA.ACCTGCCCC_F	C	T	.	.	NS=4;AF=0.033	GT	0	.	.	.	.	.	.	1	.	.	0	.	.	.	.	.	.	.	.	.	.	.	.	.	.	.	.	.	0	.
1	342527	AAAAAACTC.CAGGGGATG_F	T	A	.	.	NS=12;AF=0.033	GT	0	0	0	.	.	.	0	0	0	.	0	.	.	.	.	.	.	.	.	.	.	.	.	.	.	0	0	0	0	1
1	674331	AAAAAACTC.CGGGCCGTC_R	C	T	.	.	NS=13;AF=0.033	GT	0	0	0	.	.	1	0	0	0	.	0	0	0	0	0	.	.	.	.	.	.	.	.	.	.	.	.	.	0	.
1	694467	AAAAAACTC.GTATGCCCG_F	T	C	.	.	NS=3;AF=0.033	GT	.	.	.	.	.	.	.	1	.	.	0	.	.	.	.	.	.	.	.	.	.	.	.	.	.	.	.	.	0	.
1	589702	AAAAAACTG.ATATCCTTC_R	T	C	.	.	NS=13;AF=0.033	GT	0	0	0	.	.	.	.	0	1	.	0	0	0	0	0	.	.	.	.	.	.	.	.	.	.	0	0	.	0	.
1	4374637	AAAAAACTG.CCGGTGCTC_R	A	G	.	.	NS=8;AF=0.033	GT	.	0	0	.	1	.	0	0	.	.	0	.	.	.	.	.	.	.	.	.	.	.	.	.	.	0	0	.	.	.
1	2144669	AAAAAACTG.CCTGCGGAC_R	T	G	.	.	NS=4;AF=0.033	GT	.	.	.	.	.	.	.	0	.	.	0	.	.	.	.	.	.	1	.	.	.	.	.	.	.	.	.	.	0	.
1	3082524	AAAAAACTG.CTGATTTTC_F	G	A	.	.	NS=29;AF=0.033	GT	0	0	0	0	0	1	0	0	0	0	0	0	0	0	0	0	0	0	0	0	0	0	0	0	0	0	0	0	0	.
1	957716	AAAAAACTG.GATTTATTA_F	T	C	.	.	NS=28;AF=0.033	GT	0	0	0	0	0	1	0	0	0	0	0	0	0	0	0	0	0	0	0	0	0	0	0	0	0	0	.	0	0	.
1	322059	AAAAAACTG.GGAGGATGG_R	C	G	.	.	NS=9;AF=0.200	GT	.	.	.	.	.	1	.	0	.	.	0	1	1	1	1	.	.	.	.	.	.	.	.	.	1	.	.	.	0	.
1	354712	AAAAAAGAA.AAGAGGCTA_F	T	G	.	.	NS=14;AF=0.033	GT	0	0	0	1	0	0	0	0	.	0	0	.	.	.	.	.	.	.	.	.	.	.	.	.	.	0	0	0	0	.
1	1729070	AAAAAAGAA.GGATCGCTA_R	G	C	.	.	NS=3;AF=0.033	GT	.	.	.	.	.	.	.	1	.	.	0	.	.	.	.	.	.	.	.	.	.	.	.	.	.	.	.	.	0	.
1	2100978	AAAAAAGAC.AACGGCTCT_R	T	C	.	.	NS=11;AF=0.033	GT	0	0	0	0	0	.	1	0	0	0	0	.	.	.	.	.	.	.	.	.	.	.	.	.	.	.	.	.	0	.
1	3196987	AAAAAAGAC.ATCAGCAGA_R	C	T	.	.	NS=6;AF=0.033	GT	.	.	.	.	.	.	.	0	.	.	0	.	.	.	.	.	.	.	.	.	.	.	.	.	.	0	0	0	.	1
1	1759753	AAAAAAGAC.CTTTCAGCA_R	C	A	.	.	NS=13;AF=0.033	GT	.	.	.	0	0	.	0	1	.	0	0	.	.	.	.	.	.	.	.	.	0	0	.	0	.	0	0	0	0	.
1	4204531	AAAAAAGAC.GGTTAACAC_F	C	T	.	.	NS=5;AF=0.100	GT	.	.	.	.	.	.	.	0	.	.	0	.	.	.	.	.	.	.	.	.	.	.	.	.	.	1	1	1	.	.
1	4143651	AAAAAAGAC.TCTTTCGAC_F	G	A	.	.	NS=26;AF=0.067	GT	0	0	0	.	.	0	0	0	0	0	0	0	0	0	.	0	0	0	1	1	0	0	0	0	0	0	0	0	0	.
1	136912	AAAAAAGAC.TTCACTTTT_R	C	T	.	.	NS=3;AF=0.067	GT	.	.	.	.	.	.	.	.	.	.	0	.	.	.	.	.	.	.	.	.	1	1	.	.	.	.	.	.	.	.
1	2760247	AAAAAAGAG.TCCGCTTCC_F	A	C,T	.	.	NS=19;AF=0.300,0.033	GT	0	0	0	0	0	2	.	0	.	0	0	.	.	.	.	1	1	1	1	1	1	1	1	1	.	.	.	.	0	.
1	2678530	AAAAAAGAT.GGACGTGCA_R	A	G	.	.	NS=5;AF=0.033	GT	1	.	.	.	.	.	.	0	.	.	0	.	.	.	.	.	.	0	.	.	.	.	.	0	.	.	.	.	.	.
1	3973993	AAAAAAGCA.AAATCGACT_R	A	T	.	.	NS=11;AF=0.267	GT	.	.	.	.	.	.	.	0	.	.	0	.	.	.	.	.	1	1	1	1	1	1	1	1	.	.	.	.	0	.
1	3775714	AAAAAAGCA.CGCAAGTTG_R	G	T	.	.	NS=12;AF=0.033	GT	.	.	.	.	.	.	.	0	.	1	0	0	0	0	0	.	.	.	.	.	.	.	.	.	0	0	0	0	0	.
1	163272	AAAAAAGCA.TCGCACTTG_R	G	A	.	.	NS=12;AF=0.033	GT	.	.	.	.	1	.	0	0	.	.	0	.	.	.	.	.	0	0	0	0	.	.	0	0	.	.	.	0	0	.
1	2339411	AAAAAAGCA.TGAACTGGA_R	C	T	.	.	NS=4;AF=0.033	GT	1	.	.	.	.	.	.	0	.	.	0	.	.	.	.	.	.	.	.	.	.	.	.	.	.	.	.	.	0	.
1	2332746	AAAAAAGCC.AGCGTGTTA_F	C	G	.	.	NS=16;AF=0.200	GT	1	1	1	1	1	0	.	.	.	1	0	0	0	0	0	.	.	.	.	.	.	.	.	.	0	0	0	0	.	.
1	2040106	AAAAAAGCC.CCTATTATC_F	G	C	.	.	NS=29;AF=0.033	GT	.	0	0	0	0	0	0	0	0	0	0	0	0	0	0	0	0	0	0	0	0	0	0	0	0	0	0	0	0	1
1	4117033	AAAAAAGCC.CGCGCAGCG_F	A	G	.	.	NS=27;AF=0.033	GT	0	0	0	0	0	.	1	0	.	0	0	0	0	0	0	0	0	0	0	0	0	0	0	0	0	0	0	0	0	.
1	1073210	AAAAAAGCC.GACCGAAGT_R	T	G	.	.	NS=14;AF=0.100	GT	1	.	0	0	0	0	.	0	0	0	0	.	1	.	.	.	.	.	.	.	.	.	.	.	1	0	.	0	0	.
1	3135924	AAAAAAGCC.GATAATAAT_R	C	G	.	.	NS=3;AF=0.033	GT	.	.	.	.	.	.	.	.	.	.	0	.	.	.	.	.	.	.	.	.	.	.	.	.	.	.	.	.	0	1
1	638561	AAAAAAGCC.GCTGGCGCT_R	G	A	.	.	NS=5;AF=0.033	GT	.	.	.	0	0	1	.	0	.	.	0	.	.	.	.	.	.	.	.	.	.	.	.	.	.	.	.	.	.	.
1	278427	AAAAAAGCC.GGGGGTGGA_F	G	A	.	.	NS=22;AF=0.067	GT	.	.	.	.	.	.	0	0	0	0	0	0	0	0	0	0	0	0	1	1	0	0	0	0	0	.	0	0	0	.
1	3501709	AAAAAAGCC.GGTAGCGCT_F	C	G	.	.	NS=17;AF=0.067	GT	.	.	.	0	.	.	.	0	1	1	0	.	0	0	0	0	.	0	0	0	0	0	0	0	.	.	.	.	0	.
1	1345179	AAAAAAGCC.GGTAGCGGC_F	G	T	.	.	NS=17;AF=0.033	GT	.	.	.	0	0	.	.	0	.	.	0	.	.	.	.	0	0	0	0	0	0	0	0	0	.	0	0	.	1	0
1	3365900	AAAAAAGCC.GGTGGCGCG_F	G	C	.	.	NS=9;AF=0.033	GT	.	.	0	0	0	1	0	0	.	.	0	.	.	.	.	.	.	.	.	.	.	.	.	.	.	.	.	.	0	0
1	3740574	AAAAAAGCC.GGTGGCGTT_R	G	C	.	.	NS=18;AF=0.200	GT	.	.	.	.	.	.	.	0	0	1	0	1	.	.	1	0	0	0	0	0	0	0	0	0	1	1	.	1	.	.
1	1050187	AAAAAAGCC.GGTTAAACC_R	G	C	.	.	NS=9;AF=0.067	GT	.	.	1	.	.	1	.	0	0	.	0	.	.	.	.	.	.	.	.	.	.	.	.	.	.	0	0	0	.	0
1	1568770	AAAAAAGCC.GTCGATGAC_R	T	A	.	.	NS=5;AF=0.100	GT	.	.	.	.	.	.	.	.	.	.	0	.	.	.	.	.	.	.	.	.	.	.	.	.	.	1	1	1	0	.
1	4004125	AAAAAAGCC.GTTCAAGCC_R	A	C	.	.	NS=7;AF=0.133	GT	.	.	.	.	.	.	.	0	.	.	0	.	.	.	.	1	.	1	.	.	1	1	.	.	.	.	.	.	0	.
1	4658798	AAAAAAGCC.TTATTGCCC_R	A	C	.	.	NS=9;AF=0.033	GT	0	0	.	.	.	.	.	0	.	1	0	.	.	.	.	.	.	.	.	.	.	.	.	.	.	0	0	0	0	.
1	206768	AAAAAAGCC.TTCAACTGG_R	G	T	.	.	NS=13;AF=0.033	GT	.	.	.	.	.	1	.	0	.	.	0	.	.	.	.	0	0	0	0	0	0	0	0	0	.	.	.	.	0	.
1	3192059	AAAAAAGCC.TTTTTTTAT_R	A	G	.	.	NS=20;AF=0.033	GT	0	0	0	.	.	.	1	0	0	.	0	.	.	.	.	0	0	0	0	0	0	0	0	0	.	0	0	0	0	.
1	4686956	AAAAAAGCG.AAGCGGAAG_F	A	G	.	.	NS=24;AF=0.033	GT	.	.	.	.	.	1	0	0	0	.	0	0	0	0	0	0	0	0	0	0	0	0	0	0	0	0	0	0	0	0
1	3669269	AAAAAAGCG.ACGCAGGCT_F	T	C	.	.	NS=12;AF=0.300	GT	.	.	.	.	.	.	.	0	.	.	0	.	.	.	.	1	1	1	1	1	1	1	1	1	.	.	.	.	0	.
1	412833	AAAAAAGCG.ATTTCATTT_R	C	G	.	.	NS=21;AF=0.667	GT	1	1	1	.	.	.	.	.	.	.	0	1	1	1	1	1	1	1	1	1	1	1	1	1	1	1	1	1	.	.
1	2814217	AAAAAAGCG.CAGAGCATC_F	T	C	.	.	NS=14;AF=0.233	GT	1	1	1	0	0	0	1	0	.	0	0	.	.	.	.	.	.	.	.	.	.	.	.	.	.	1	1	1	0	.
1	217484	AAAAAAGCG.CGATTTAAT_F	A	G	.	.	NS=29;AF=0.133	GT	1	1	1	0	0	1	0	0	.	0	0	0	0	0	0	0	0	0	0	0	0	0	0	0	0	0	0	0	0	0
1	1399570	AAAAAAGCG.CTTTTTTAG_F	C	T	.	.	NS=5;AF=0.100	GT	.	.	.	.	.	.	.	0	.	.	0	.	.	.	.	.	.	.	.	.	.	.	.	.	.	1	1	1	.	.
1	778489	AAAAAAGCG.GAGAGGTGG_R	A	C	.	.	NS=9;AF=0.167	GT	1	1	1	.	1	.	0	0	.	1	0	.	.	.	.	.	.	.	.	.	.	.	.	.	.	.	.	.	0	.
1	4302335	AAAAAAGCG.GATTCTCCC_F	G	T	.	.	NS=4;AF=0.033	GT	.	.	.	.	.	.	.	0	.	.	0	.	.	.	.	.	.	.	.	.	.	.	.	.	.	.	.	.	0	1
1	4472215	AAAAAAGCG.GCCTTGTAA_F	T	C	.	.	NS=3;AF=0.033	GT	.	.	.	.	.	.	.	.	.	.	0	.	1	.	.	.	.	.	.	.	.	.	.	.	.	.	.	.	0	.
1	1399612	AAAAAAGCG.GGGAGTGCA_F	A	G	.	.	NS=3;AF=0.067	GT	.	.	.	.	.	.	.	1	.	.	0	.	.	.	.	.	.	.	.	.	.	.	.	.	.	.	.	.	1	.
1	3103102	AAAAAAGCG.GTAAGAACA_R	C	G	.	.	NS=21;AF=0.033	GT	0	0	0	0	0	.	.	0	1	0	0	0	.	.	.	0	.	0	0	0	0	0	0	0	0	.	0	.	0	.
1	3775538	AAAAAAGCT.TTCGTTCCG_R	G	A	.	.	NS=29;AF=0.067	GT	0	0	0	0	0	1	0	0	0	0	0	0	0	0	.	0	0	0	0	0	0	0	0	0	0	0	0	0	0	1
1	1567741	AAAAAAGGA.GAGCTGACC_R	G	A	.	.	NS=19;AF=0.067	GT	0	.	0	.	.	.	0	0	.	.	0	.	.	.	.	0	0	0	0	0	0	0	0	0	.	1	0	1	0	0
1	3020749	AAAAAAGGC.CTCTGTCAC_F	T	C	.	.	NS=27;AF=0.067	GT	0	0	0	.	.	1	0	0	0	0	0	0	0	0	0	0	0	0	0	0	0	0	0	0	0	1	0	0	0	.
1	1863221	AAAAAAGGC.GCCAGATGG_F	T	C	.	.	NS=7;AF=0.067	GT	.	0	0	.	.	.	.	0	1	.	0	.	.	.	.	.	.	.	.	.	.	.	.	.	.	.	1	.	0	.
1	2285452	AAAAAAGGC.GTCTCAGAC_R	G	C	.	.	NS=10;AF=0.267	GT	.	.	.	.	.	.	.	.	.	.	0	1	1	1	1	.	.	.	.	.	.	.	.	.	1	1	1	1	0	.
1	4481575	AAAAAAGGC.TCCGTGATG_F	A	G	.	.	NS=15;AF=0.033	GT	0	.	.	0	0	.	0	0	.	1	0	0	0	0	0	.	.	.	.	.	.	.	.	.	0	0	0	.	0	.
1	4084796	AAAAAAGGG.CAGAGCCAG_R	G	A	.	.	NS=28;AF=0.033	GT	0	0	0	0	0	0	0	0	.	0	0	0	0	0	1	0	0	0	0	0	0	0	0	0	0	0	0	0	0	.
1	3887801	AAAAAAGGG.TCGTTGACC_F	G	A	.	.	NS=12;AF=0.067	GT	0	0	0	0	0	.	.	1	1	0	0	.	.	.	.	.	.	.	.	.	.	.	.	.	.	0	0	.	0	.
1	4631854	AAAAAAGGG.TGCTGGCCT_R	C	A	.	.	NS=4;AF=0.033	GT	.	.	.	.	.	.	1	0	.	.	0	.	.	.	.	.	.	.	.	.	.	.	.	.	.	.	.	.	0	.
1	2639455	AAAAAAGGG.TTATCCTTA_F	C	G	.	.	NS=5;AF=0.067	GT	.	.	.	1	1	.	.	0	.	.	0	.	.	.	.	.	.	.	.	.	.	.	.	.	.	.	.	.	0	.
1	1626861	AAAAAAGGT.CCGAGGCTG_R	C	T	.	.	NS=15;AF=0.033	GT	0	0	0	0	0	.	0	0	.	0	0	0	0	0	0	.	.	.	.	.	.	.	.	.	0	.	.	.	1	.
1	4288436	AAAAAAGGT.TTCATCCCT_R	A	T	.	.	NS=3;AF=0.033	GT	.	.	.	.	.	.	.	0	.	.	0	.	.	.	.	.	.	.	.	.	.	.	.	.	.	.	.	.	1	.
1	1507136	AAAAAAGTC.CGGAAGATA_R	T	C	.	.	NS=15;AF=0.300	GT	1	1	1	.	.	.	1	0	.	.	0	1	.	1	1	.	.	.	.	.	.	.	.	.	1	0	0	0	0	1
1	2766614	AAAAAAGTC.TATGTTGAA_R	C	T	.	.	NS=29;AF=0.033	GT	0	0	0	0	0	0	0	0	1	0	0	0	0	0	0	0	0	0	0	0	0	0	0	0	0	0	0	0	0	.
1	1490237	AAAAAAGTT.GGACCCGCT_F	A	G	.	.	NS=4;AF=0.067	GT	.	.	.	.	.	1	.	.	1	.	0	.	.	.	.	.	.	.	.	.	.	.	.	.	.	.	.	.	0	.
1	2688944	AAAAAAGTT.TGGAACCTA_R	G	A	.	.	NS=2;AF=0.033	GT	.	.	.	.	.	.	.	1	.	.	0	.	.	.	.	.	.	.	.	.	.	.	.	.	.	.	.	.	.	.
1	611836	AAAAAATAA.CAGTTAGCC_R	T	A	.	.	NS=23;AF=0.300	GT	0	0	0	.	.	.	0	0	.	.	0	0	0	0	0	1	1	1	1	1	1	1	1	1	.	0	0	0	0	.
1	3027471	AAAAAATAA.CGACGCCTT_F	C	T	.	.	NS=30;AF=0.033	GT	0	0	0	0	0	0	0	0	0	0	0	0	0	0	0	0	0	0	0	0	0	0	0	0	0	0	0	0	0	1
1	2694079	AAAAAATAA.CTGGCAGAA_R	T	A	.	.	NS=5;AF=0.067	GT	.	.	.	.	.	.	.	1	.	.	0	.	.	.	.	0	.	0	.	.	.	.	.	.	.	.	.	.	1	.
1	872486	AAAAAATAC.TATGCCATG_F	C	T	.	.	NS=30;AF=0.033	GT	0	0	0	0	0	0	0	0	0	0	0	0	0	0	0	0	1	0	0	0	0	0	0	0	0	0	0	0	0	0
1	1672309	AAAAAATAC.TGCTGAGTA_R	T	G	.	.	NS=2;AF=0.033	GT	.	.	.	.	.	.	.	1	.	.	0	.	.	.	.	.	.	.	.	.	.	.	.	.	.	.	.	.	.	.
1	61850	AAAAAATAG.CCCGCGAAT_R	A	G	.	.	NS=2;AF=0.033	GT	.	.	.	.	.	.	.	.	.	.	0	.	.	.	.	.	.	.	.	.	.	.	.	.	.	.	.	.	1	.
1	2772934	AAAAAATAG.CTCAACTGT_R	G	A	.	.	NS=10;AF=0.233	GT	1	1	1	.	.	.	.	0	1	.	0	.	.	.	.	.	.	.	.	.	.	.	.	.	.	1	1	1	0	.
1	3555871	AAAAAATAT.GATAACTTT_R	A	G	.	.	NS=8;AF=0.167	GT	.	.	.	.	.	.	.	0	.	.	0	1	1	1	1	.	.	.	.	.	.	.	.	.	1	.	.	.	0	.
1	3816006	AAAAAATAT.GTTTTATCC_F	C	T	.	.	NS=3;AF=0.033	GT	.	.	.	.	.	.	.	1	.	.	0	.	.	.	.	.	.	.	.	.	.	.	.	.	.	.	.	.	0	.
1	4314795	AAAAAATCA.AACAAGGCA_F	C	T	.	.	NS=3;AF=0.033	GT	1	.	.	.	.	0	.	.	.	.	0	.	.	.	.	.	.	.	.	.	.	.	.	.	.	.	.	.	.	.
1	4335567	AAAAAATCA.CAGTACGCT_F	C	T	.	.	NS=18;AF=0.100	GT	0	.	0	.	.	.	0	0	.	.	0	.	.	.	.	0	0	0	0	0	0	0	0	0	.	1	1	1	0	.
1	962147	AAAAAATCA.CCCAATTTT_R	T	G	.	.	NS=2;AF=0.033	GT	1	.	.	.	.	.	.	.	.	.	0	.	.	.	.	.	.	.	.	.	.	.	.	.	.	.	.	.	.	.
1	3543799	AAAAAATCA.CCTTTTCGG_F	C	T	.	.	NS=25;AF=0.033	GT	0	0	0	0	0	.	0	0	0	0	0	0	.	1	0	0	0	0	0	0	0	0	0	0	0	0	0	.	.	.
1	1976495	AAAAAATCA.CTGGAGAAT_R	G	A	.	.	NS=4;AF=0.033	GT	.	.	.	.	.	.	.	0	.	.	0	.	.	1	.	.	.	.	.	.	.	.	.	.	.	.	.	.	0	.
1	112197	AAAAAATCA.TATATCTGC_R	T	C	.	.	NS=7;AF=0.033	GT	.	.	.	.	.	.	.	0	0	.	0	.	.	.	.	.	.	.	.	.	.	.	.	.	.	0	0	1	0	.
1	789035	AAAAAATCC.CCCTTTGTC_F	G	T	.	.	NS=15;AF=0.400	GT	.	.	.	.	.	.	.	0	.	.	0	.	.	.	.	1	1	1	1	1	1	1	1	1	.	1	1	1	0	.
1	4586164	AAAAAATCC.CGCCGATGC_R	G	T	.	.	NS=4;AF=0.033	GT	.	.	.	.	.	.	.	0	.	.	0	.	.	.	.	.	.	.	.	.	.	.	.	.	.	.	.	.	0	1
1	4031258	AAAAAATCC.CTGCTGCAG_R	G	T	.	.	NS=2;AF=0.067	GT	.	.	.	.	.	.	.	.	.	.	0	1	.	.	.	.	.	.	.	.	.	.	.	.	.	.	.	.	.	.
1	1099813	AAAAAATCC.GAATTCACC_F	T	C	.	.	NS=12;AF=0.033	GT	0	0	0	.	.	.	.	0	1	0	0	.	.	.	.	.	.	0	.	.	.	.	.	.	.	0	0	0	0	.
1	1750997	AAAAAATCC.GAGACGTAT_F	G	C,T	.	.	NS=6;AF=0.033,0.100	GT	.	1	.	.	.	.	.	0	.	.	0	.	.	.	.	.	.	.	.	.	.	.	.	.	.	2	2	2	.	.
1	1877998	AAAAAATCC.GTTACCCAG_R	T	C	.	.	NS=3;AF=0.033	GT	.	.	.	.	.	.	.	0	.	.	0	.	.	.	1	.	.	.	.	.	.	.	.	.	.	.	.	.	.	.
1	2708584	AAAAAATCG.ACCCAGTTT_R	A	T	.	.	NS=9;AF=0.167	GT	.	.	.	.	.	.	.	0	.	.	0	.	.	.	.	1	0	1	1	1	.	.	.	.	.	.	1	.	0	.
1	451714	AAAAAATCG.ATTAGCCAT_R	G	A	.	.	NS=16;AF=0.033	GT	0	0	0	.	.	.	0	0	1	.	0	0	0	0	0	.	.	.	.	.	.	.	.	.	0	0	0	0	0	.
1	2004300	AAAAAATCG.CAGAAAATG_F	C	T	.	.	NS=19;AF=0.033	GT	0	0	0	0	0	.	0	1	0	0	0	0	0	0	0	.	.	.	.	.	.	.	.	.	0	0	0	0	0	.
1	589790	AAAAAATCG.CCCTCGTCA_R	C	T	.	.	NS=3;AF=0.033	GT	.	.	.	.	.	.	.	0	.	.	0	.	.	.	.	.	.	.	.	.	.	.	.	.	.	.	.	.	1	.
1	3327144	AAAAAATCG.CCTGAATGG_F	A	G,T	.	.	NS=18;AF=0.033,0.100	GT	0	0	0	.	.	.	.	.	0	.	0	.	.	.	.	0	1	0	0	0	0	0	0	0	.	2	2	2	0	.
1	1478673	AAAAAATCG.CTGAATCAA_F	C	T	.	.	NS=25;AF=0.133	GT	1	1	1	0	0	.	1	0	0	0	0	0	0	0	0	0	0	0	0	0	0	0	0	0	0	.	.	.	0	.
1	98360	AAAAAATCG.TCTTGGCGT_R	A	G	.	.	NS=29;AF=0.033	GT	0	0	0	0	0	0	1	0	0	0	0	0	0	0	0	0	0	0	0	0	0	0	0	0	0	0	0	0	0	.
1	1287457	AAAAAATCG.TGTGGGATA_R	G	A	.	.	NS=23;AF=0.167	GT	0	0	0	0	0	0	.	0	.	0	0	1	1	1	1	.	0	0	0	0	0	0	0	0	1	.	.	.	0	.
1	3818033	AAAAAATCT.AAGGACGTG_R	C	G,T	.	.	NS=9;AF=0.033,0.033	GT	0	0	0	.	.	.	.	0	0	0	0	.	.	.	.	.	.	.	.	.	.	.	.	.	.	.	1	.	2	.
1	92333	AAAAAATCT.AGGACAGAG_F	C	T	.	.	NS=2;AF=0.033	GT	.	.	.	.	.	.	.	1	.	.	0	.	.	.	.	.	.	.	.	.	.	.	.	.	.	.	.	.	.	.
1	2625537	AAAAAATCT.ATCCTCGTT_R	A	C	.	.	NS=10;AF=0.100	GT	.	.	.	.	.	.	1	0	.	.	0	0	0	0	.	.	.	.	.	.	.	.	.	.	0	1	1	.	0	.
1	3947533	AAAAAATGA.GAGATGACG_F	T	C	.	.	NS=9;AF=0.267	GT	1	1	1	.	.	.	1	.	.	.	0	.	.	.	.	.	.	.	.	.	.	.	.	.	.	1	1	1	1	.
1	2574960	AAAAAATGC.ATAACGAAA_R	T	C	.	.	NS=8;AF=0.100	GT	.	.	.	.	.	.	.	0	.	.	0	1	0	1	1	.	.	.	.	.	.	.	.	.	0	.	.	.	0	.
1	1695328	AAAAAATGC.CCGCGGATC_F	A	G	.	.	NS=15;AF=0.100	GT	1	1	1	.	.	.	.	0	0	.	0	.	.	.	.	0	.	0	0	0	0	0	0	0	.	.	.	.	0	.
1	1298879	AAAAAATGC.GGTCTGGCG_R	C	A	.	.	NS=10;AF=0.033	GT	.	.	.	.	.	.	.	.	.	.	0	0	0	0	0	.	.	.	.	.	.	.	.	1	0	0	0	0	.	.
1	2180102	AAAAAATGC.GGTTGCATA_F	C	A	.	.	NS=5;AF=0.067	GT	.	.	.	.	.	1	.	0	1	.	0	.	.	.	.	.	.	.	.	.	.	.	.	.	.	.	.	.	0	.
1	122357	AAAAAATGC.TCAAAATGG_R	G	A	.	.	NS=17;AF=0.033	GT	0	0	0	0	0	.	0	0	.	1	0	.	0	0	0	.	.	.	.	.	.	.	.	.	0	0	0	0	0	.
1	1494217	AAAAAATGG.TATCGGGTC_F	T	G	.	.	NS=29;AF=0.033	GT	0	0	.	0	0	1	0	0	0	0	0	0	0	0	0	0	0	0	0	0	0	0	0	0	0	0	0	0	0	0
1	1006191	AAAAAATGG.TGACCAGCA_R	C	T	.	.	NS=12;AF=0.167	GT	0	0	0	.	.	.	0	.	.	.	0	1	1	1	1	.	.	.	.	.	.	.	.	.	1	0	.	0	.	.
1	3372960	AAAAAATGT.CGCGCAATT_F	G	A	.	.	NS=12;AF=0.033	GT	.	.	.	.	.	.	.	0	.	.	0	.	.	.	.	0	0	0	0	0	0	0	0	0	.	.	.	.	1	.
1	4086634	AAAAAATTA.TGGGGATTC_F	C	T	.	.	NS=7;AF=0.067	GT	.	.	.	.	.	.	0	0	0	.	0	1	.	.	1	.	.	.	.	.	.	.	.	.	.	.	.	.	0	.
1	2343740	AAAAAATTA.TGTTACTTT_R	G	A	.	.	NS=17;AF=0.033	GT	.	0	0	0	0	.	1	0	0	0	0	0	0	0	0	.	.	.	.	.	.	.	.	.	0	.	0	0	0	.
1	2791578	AAAAAATTC.AGGTGACGC_R	G	A	.	.	NS=3;AF=0.033	GT	.	.	.	.	.	.	.	0	.	.	0	.	.	.	.	.	.	.	.	.	.	.	.	.	.	.	.	.	1	.
1	1617195	AAAAAATTG.CCAGGTCCG_R	T	G	.	.	NS=4;AF=0.033	GT	1	.	.	.	.	.	.	0	.	.	0	.	.	.	.	.	.	.	.	.	.	.	.	.	.	.	.	.	0	.
1	655231	AAAAAATTG.CCGAGTAAA_F	G	T	.	.	NS=18;AF=0.033	GT	.	.	.	0	0	.	.	0	0	0	0	.	.	.	.	1	0	0	0	0	0	0	0	0	.	.	0	0	0	.
1	2931952	AAAAAATTG.GTAAATACG_R	C	T	.	.	NS=18;AF=0.033	GT	0	.	.	0	0	1	.	0	.	0	0	.	.	.	.	0	.	.	0	0	0	0	0	0	.	0	0	0	0	.
1	1493987	AAAAAATTG.TAAAAGGCG_F	A	T	.	.	NS=30;AF=0.033	GT	0	0	0	0	0	0	0	0	0	0	0	0	0	0	0	0	0	0	0	0	0	0	0	0	0	0	0	0	0	1
1	2619207	AAAAAATTT.AAATACGTT_F	A	G	.	.	NS=27;AF=0.233	GT	0	0	0	1	1	.	0	0	0	.	0	1	1	1	1	0	0	0	0	0	0	0	0	0	1	0	0	0	0	.
1	2339608	AAAAAATTT.CAGACCAAC_F	C	T	.	.	NS=4;AF=0.033	GT	.	.	.	.	.	.	.	.	.	.	0	.	.	.	.	.	.	.	.	.	.	.	.	.	.	1	0	0	.	.
1	2469602	AAAAAATTT.CCCGCAGCA_R	C	T	.	.	NS=26;AF=0.033	GT	.	0	0	0	0	.	0	0	1	.	0	0	0	0	0	0	0	0	0	0	0	0	0	0	0	0	0	0	0	.
1	1307781	AAAAACAAA.AAGCCCGCA_F	A	C	.	.	NS=28;AF=0.033	GT	0	0	0	0	1	0	0	0	0	.	0	0	0	0	0	0	0	0	0	0	0	0	0	0	0	0	0	.	0	0
1	3285307	AAAAACAAA.CTGCGGGCG_R	G	A	.	.	NS=22;AF=0.300	GT	0	0	0	.	.	.	.	0	.	.	0	0	0	0	0	1	1	1	1	1	1	1	1	1	0	0	0	.	0	.
1	3388750	AAAAACAAA.GCCAGCGAG_R	A	G	.	.	NS=3;AF=0.067	GT	.	.	.	.	.	.	.	1	.	.	0	.	.	.	.	.	.	.	.	.	.	.	.	.	.	.	.	.	1	.
1	3825756	AAAAACAAA.GGCAATGAA_F	G	A	.	.	NS=10;AF=0.233	GT	1	.	.	.	.	.	1	0	.	.	0	1	1	1	1	.	.	.	.	.	.	.	.	.	1	.	.	.	0	.
1	4641691	AAAAACAAC.AGAAGCAGA_R	T	C	.	.	NS=23;AF=0.033	GT	.	.	.	.	.	1	0	0	0	.	0	0	0	0	0	0	0	0	0	0	0	0	0	0	0	0	0	0	0	.
1	2480204	AAAAACAAC.GCAAAGGAA_F	C	T	.	.	NS=25;AF=0.500	GT	.	1	1	1	1	.	1	0	1	1	0	0	.	0	0	1	1	1	1	1	1	1	.	1	0	0	0	0	0	.
1	1986903	AAAAACAAC.TACAACTTC_R	C	A	.	.	NS=19;AF=0.033	GT	0	0	0	0	0	.	0	0	0	1	0	0	0	0	0	.	.	.	.	.	.	.	.	.	0	0	0	0	0	.
1	806172	AAAAACAAT.AACAGCTTC_R	T	C	.	.	NS=14;AF=0.267	GT	0	.	.	1	1	1	0	0	0	1	0	1	1	1	1	.	.	.	.	.	.	.	.	.	.	.	.	.	0	.
1	2191537	AAAAACAAT.ACGCCAAAA_R	T	C	.	.	NS=6;AF=0.100	GT	.	.	.	.	.	.	.	0	.	.	0	.	.	.	.	.	.	.	1	1	.	.	1	.	.	.	.	.	0	.
1	4093930	AAAAACAAT.CGCCTGCTT_R	T	C	.	.	NS=16;AF=0.300	GT	0	0	0	.	.	.	.	0	0	.	0	.	.	.	.	1	1	1	1	1	1	1	1	1	.	.	.	.	0	.
1	2410776	AAAAACAAT.TTACTTGCC_R	G	T	.	.	NS=5;AF=0.033	GT	.	.	.	.	.	.	.	0	1	.	0	.	.	.	.	.	.	.	.	.	.	.	.	.	.	.	0	.	0	.
1	278326	AAAAACACA.TGAATTTTG_F	C	G	.	.	NS=13;AF=0.300	GT	.	.	.	.	.	.	.	0	0	.	0	.	.	.	.	1	1	1	1	1	1	1	1	1	.	.	.	.	0	.
1	2789293	AAAAACACA.TGTCTCTGA_R	A	C	.	.	NS=4;AF=0.033	GT	1	0	0	.	.	.	.	.	.	.	0	.	.	.	.	.	.	.	.	.	.	.	.	.	.	.	.	.	.	.
1	3979365	AAAAACACA.TTCGCCGGA_F	T	C	.	.	NS=13;AF=0.167	GT	0	.	.	.	.	.	0	0	.	.	0	1	1	1	1	.	.	.	.	.	.	.	.	.	1	0	0	0	0	.
1	1160885	AAAAACACC.AACTCTACT_F	C	A	.	.	NS=15;AF=0.167	GT	.	.	.	.	.	.	.	0	.	.	0	1	1	1	1	0	0	0	0	0	0	0	0	.	1	.	.	.	.	.
1	2828946	AAAAACACC.CTCACCCTG_R	G	T	.	.	NS=3;AF=0.033	GT	.	.	.	.	.	.	.	1	.	.	0	.	.	.	.	.	.	.	.	.	.	.	.	.	.	.	.	.	0	.
1	1819096	AAAAACACC.TCACCGCCC_R	G	T	.	.	NS=9;AF=0.033	GT	0	.	.	.	.	1	.	0	0	.	0	.	.	.	.	.	.	.	.	.	.	.	.	.	.	0	0	0	0	.
1	610288	AAAAACACC.TTGCCTTCT_R	T	C	.	.	NS=9;AF=0.100	GT	.	.	.	1	1	.	.	0	.	1	0	.	.	.	.	.	.	.	.	.	.	.	.	.	.	0	0	0	0	.
1	4018321	AAAAACACG.AAAACCCCA_R	C	G	.	.	NS=7;AF=0.200	GT	1	1	1	1	.	.	.	.	.	.	0	.	.	1	.	.	.	.	.	.	.	.	.	.	.	1	.	.	.	.
1	345879	AAAAACACG.TGCGCTGGA_R	G	A	.	.	NS=14;AF=0.033	GT	0	0	0	.	0	.	0	0	0	0	0	.	.	.	.	.	.	.	.	.	.	.	.	.	.	0	0	0	0	1
1	1567439	AAAAACAGA.ACATAATTA_F	G	C,T	.	.	NS=16;AF=0.100,0.167	GT	2	1	1	2	1	.	.	0	2	2	0	0	0	0	0	2	.	.	.	.	.	.	.	.	0	.	.	.	0	.
1	3096819	AAAAACAGA.CCACGGTGA_F	A	T	.	.	NS=14;AF=0.167	GT	0	0	0	.	.	.	0	0	0	0	0	1	1	1	1	.	.	.	.	.	.	.	.	.	1	.	.	.	0	.
1	631546	AAAAACAGA.GATAACGGT_R	T	C	.	.	NS=16;AF=0.033	GT	0	0	0	0	0	.	0	0	.	0	0	0	0	0	0	.	.	.	.	.	.	.	.	.	.	1	.	0	0	.
1	2316674	AAAAACAGA.GCCACCTCA_F	C	A	.	.	NS=2;AF=0.033	GT	.	.	.	.	.	.	.	.	.	.	0	.	.	.	.	.	.	.	.	.	.	.	.	.	.	.	.	.	1	.
1	2643480	AAAAACAGC.AACGAATGC_F	A	G	.	.	NS=7;AF=0.033	GT	.	0	0	.	.	1	.	.	.	.	0	.	.	.	.	.	.	.	.	.	.	.	.	.	.	0	0	0	.	.
1	3037678	AAAAACAGC.ACAAAAGCG_F	T	A	.	.	NS=3;AF=0.067	GT	.	.	.	.	.	.	.	1	.	.	0	.	.	1	.	.	.	.	.	.	.	.	.	.	.	.	.	.	.	.
1	2917057	AAAAACAGC.CCAGCCCGA_R	C	T	.	.	NS=11;AF=0.167	GT	.	.	.	.	.	.	.	0	.	.	0	1	1	1	1	.	.	.	.	.	.	.	.	.	1	0	0	0	0	.
1	550902	AAAAACAGC.CCCGCCGTC_F	G	A	.	.	NS=12;AF=0.100	GT	.	0	.	0	0	.	0	0	.	0	0	.	.	.	.	1	.	.	1	1	.	.	.	.	.	.	0	.	0	.
1	1185326	AAAAACAGC.GCCGTTAGC_R	C	G	.	.	NS=9;AF=0.033	GT	0	0	0	.	0	.	1	0	.	0	0	.	.	.	.	.	.	.	.	.	.	.	.	.	.	.	.	.	0	.
1	4255517	AAAAACAGC.TAGGTTTCC_F	A	G	.	.	NS=21;AF=0.033	GT	0	0	.	0	0	1	.	0	.	0	0	.	.	.	.	0	0	0	0	0	0	0	0	0	.	0	0	0	0	.
1	4434970	AAAAACAGC.TGGTGCGCA_R	C	G	.	.	NS=2;AF=0.033	GT	.	.	.	.	.	.	.	.	1	.	0	.	.	.	.	.	.	.	.	.	.	.	.	.	.	.	.	.	.	.
1	6611	AAAAACAGG.ATATCCTTC_F	A	G	.	.	NS=16;AF=0.267	GT	0	0	0	.	.	.	.	0	0	0	0	1	1	1	1	.	.	.	.	.	.	.	.	.	1	1	1	1	0	.
1	4590310	AAAAACAGG.CGCCACTGG_R	T	G	.	.	NS=8;AF=0.167	GT	.	.	.	.	.	.	.	0	.	.	0	1	1	1	1	.	.	.	.	.	.	.	.	.	1	.	.	.	0	.
1	2285299	AAAAACAGG.GGTAAGACA_F	C	T	.	.	NS=25;AF=0.033	GT	0	0	0	.	.	.	1	0	0	.	0	0	0	0	0	0	0	0	0	0	0	0	0	0	0	0	0	0	0	.
1	3852749	AAAAACAGG.TGTTTTATT_R	T	C	.	.	NS=29;AF=0.600	GT	1	1	1	1	1	1	1	0	1	1	0	0	0	0	0	1	1	1	1	1	1	1	1	1	0	0	0	0	0	.
1	2225789	AAAAACAGT.ACCGCGCCA_R	G	A	.	.	NS=13;AF=0.167	GT	1	.	1	.	.	.	.	0	.	0	0	0	0	.	0	.	.	.	.	.	.	.	.	.	0	1	1	1	0	.
1	923202	AAAAACATA.CGTCGGGTA_R	C	G	.	.	NS=3;AF=0.033	GT	.	.	.	.	.	.	.	1	.	.	0	.	.	.	.	.	.	.	.	.	.	.	.	.	.	.	.	.	0	.
1	3197304	AAAAACATA.TGATGAACG_R	G	T	.	.	NS=23;AF=0.067	GT	.	1	1	.	.	.	.	0	0	.	0	0	0	0	0	0	0	0	0	0	0	0	0	0	0	0	0	0	0	.
1	2081421	AAAAACATC.CATCGGTCG_R	A	C	.	.	NS=5;AF=0.067	GT	.	1	1	.	.	.	.	0	.	.	0	.	.	.	.	.	.	.	.	.	.	.	.	.	.	.	.	.	0	.
1	1097515	AAAAACATC.TAGAAAGAG_F	G	A	.	.	NS=5;AF=0.067	GT	.	1	1	.	.	.	.	0	.	.	0	.	.	.	.	.	.	.	.	.	.	.	.	.	.	.	.	.	0	.
1	3066554	AAAAACATC.TTACCCCCG_F	A	G	.	.	NS=27;AF=0.400	GT	1	1	1	0	0	.	1	0	0	.	0	1	1	1	1	0	0	0	0	0	0	0	0	0	1	1	1	1	0	.
1	1538519	AAAAACCAA.AACATCCCT_F	T	C	.	.	NS=5;AF=0.067	GT	.	.	.	1	1	.	.	0	.	.	0	.	.	.	.	.	.	.	.	.	.	.	.	.	.	.	.	.	0	.
1	3815475	AAAAACCAA.ACCGGCGGT_R	G	A	.	.	NS=5;AF=0.067	GT	.	1	1	.	.	.	.	0	.	.	0	.	.	.	.	.	.	.	.	.	.	.	.	.	.	.	.	.	0	.
1	3039938	AAAAACCAA.TACTTCAAC_R	G	A	.	.	NS=7;AF=0.067	GT	.	.	.	1	.	.	.	0	0	1	0	.	.	0	.	.	.	.	.	.	.	.	.	.	.	.	.	.	0	.
1	4667542	AAAAACCAC.CATATCGAA_R	G	C	.	.	NS=12;AF=0.300	GT	.	.	.	.	.	.	.	0	.	.	0	.	.	.	.	1	1	1	1	1	1	1	1	1	.	.	.	.	0	.
1	2389138	AAAAACCAC.CTGCTGTTT_R	C	T	.	.	NS=7;AF=0.033	GT	.	.	.	.	.	.	.	0	1	.	0	.	.	.	.	.	.	.	.	.	.	.	.	.	.	0	0	0	0	.
1	3323563	AAAAACCAC.CTTTTGGGT_F	C	A	.	.	NS=13;AF=0.033	GT	0	0	0	1	0	.	0	0	0	.	0	.	.	.	.	.	.	.	.	.	.	.	.	.	.	0	0	0	0	.
1	1493220	AAAAACCAC.GGGGTCGAT_F	A	C,G	.	.	NS=23;AF=0.300,0.167	GT	.	.	.	0	0	.	.	0	0	0	0	2	2	2	2	1	1	1	1	1	1	1	1	1	2	0	0	.	0	.
1	2888780	AAAAACCAC.GTGTTTAAC_F	C	G	.	.	NS=9;AF=0.167	GT	.	.	.	.	.	.	0	0	.	.	0	1	1	1	1	.	.	.	.	.	.	.	.	.	1	.	.	.	0	.
1	823319	AAAAACCAC.TTAGCAATG_F	A	G,T	.	.	NS=29;AF=0.033,0.033	GT	0	0	0	0	0	1	0	0	0	0	0	0	0	0	0	0	0	0	0	0	0	0	0	0	.	0	0	0	0	2
1	1024581	AAAAACCAG.AATAAACAG_R	T	C	.	.	NS=10;AF=0.233	GT	.	.	.	1	1	.	1	0	.	1	0	.	.	.	.	.	.	.	.	.	.	.	.	.	.	1	1	1	0	.
1	2036801	AAAAACCAG.ACTGAACGG_F	C	A	.	.	NS=23;AF=0.033	GT	0	0	0	0	0	.	0	.	0	0	0	0	0	0	0	.	.	0	0	0	.	.	.	0	0	0	0	0	0	1
1	1953085	AAAAACCAG.TCCGGACGC_R	G	T	.	.	NS=8;AF=0.133	GT	1	1	1	.	.	.	1	0	0	.	0	.	.	.	.	.	.	.	.	.	.	.	.	.	.	.	.	.	0	.
1	3802964	AAAAACCAG.TGATTATGT_R	C	T	.	.	NS=14;AF=0.033	GT	.	.	.	.	.	.	.	0	1	0	0	.	.	.	.	0	0	0	0	0	0	0	0	0	.	.	.	.	0	.
1	1139381	AAAAACCAT.AACGATGGA_R	C	G	.	.	NS=14;AF=0.033	GT	.	.	.	.	.	.	.	0	0	.	0	.	1	.	.	0	0	0	0	0	0	0	0	0	.	.	.	.	0	.
1	3563860	AAAAACCAT.ACTGTGTTT_R	T	C	.	.	NS=30;AF=0.400	GT	0	0	0	0	0	0	1	0	0	0	0	1	1	1	1	0	1	1	1	1	0	0	1	1	1	0	0	0	0	0
1	2034834	AAAAACCAT.CAGCGCCGA_F	C	A	.	.	NS=16;AF=0.100	GT	0	0	0	0	0	.	1	.	0	.	0	0	0	0	0	.	.	.	.	.	.	.	.	.	0	.	1	1	0	.
1	2907760	AAAAACCAT.CAGGGGAGA_R	G	A	.	.	NS=28;AF=0.300	GT	0	0	0	0	0	0	0	0	0	0	0	0	0	0	0	1	1	1	1	1	1	1	1	1	0	.	0	0	0	.
1	3802477	AAAAACCAT.CCCATAGAC_F	T	C	.	.	NS=8;AF=0.133	GT	1	1	1	.	.	.	1	0	0	.	0	.	.	.	.	.	.	.	.	.	.	.	.	.	.	.	.	.	0	.
1	1705207	AAAAACCAT.GGCGTGACG_F	C	T	.	.	NS=21;AF=0.333	GT	0	0	0	0	0	.	.	0	0	.	0	.	.	.	.	1	1	1	1	1	1	1	1	1	.	0	0	0	1	.
1	481313	AAAAACCCA.ATCACGGGT_R	G	T	.	.	NS=16;AF=0.033	GT	1	.	.	.	.	.	.	.	.	.	0	0	0	0	0	0	0	0	0	0	0	0	0	0	0	.	.	.	.	.
1	31439	AAAAACCCC.CCCGGTTTG_R	C	T	.	.	NS=29;AF=0.033	GT	0	0	0	0	0	0	0	0	1	0	0	0	0	0	0	0	0	0	0	0	0	0	0	0	0	0	0	0	0	.
1	1136968	AAAAACCCG.CCACACAGC_F	A	C,T	.	.	NS=13;AF=0.067,0.300	GT	.	.	.	1	1	.	2	0	.	2	0	2	2	.	2	.	.	.	.	.	.	.	.	.	2	2	2	2	.	.
1	4334228	AAAAACCCG.TGATAGTGC_F	G	A	.	.	NS=2;AF=0.033	GT	.	.	.	.	.	.	.	.	.	.	0	.	.	.	.	.	.	.	.	.	.	.	.	.	.	.	.	.	1	.
1	4647490	AAAAACCCG.TGGGTGGGT_F	C	T	.	.	NS=14;AF=0.067	GT	.	.	.	0	0	.	0	0	.	0	0	0	0	0	0	.	.	.	.	.	.	.	.	.	0	1	1	.	0	.
1	1383518	AAAAACCCT.CTCCCCTCT_R	A	C	.	.	NS=5;AF=0.033	GT	.	.	.	.	.	.	.	0	.	.	0	.	.	.	.	.	.	.	.	.	.	.	.	.	.	0	.	.	0	1
1	4018756	AAAAACCGA.CACCTTACC_F	C	T	.	.	NS=8;AF=0.133	GT	1	1	1	0	.	.	.	.	.	.	0	0	0	1	.	.	.	.	.	.	.	.	.	.	.	.	.	.	.	.
1	3355376	AAAAACCGA.CAGTCGTCG_F	T	C	.	.	NS=13;AF=0.333	GT	1	1	1	.	.	.	.	1	0	.	0	.	.	.	.	1	1	1	.	.	.	.	1	.	.	.	1	1	0	.
1	1181588	AAAAACCGA.CTTGCGAGC_F	T	C	.	.	NS=3;AF=0.033	GT	.	.	.	.	.	.	.	1	.	.	0	.	.	.	.	.	.	.	.	.	.	.	.	.	.	.	.	.	0	.
1	1866320	AAAAACCGA.GCCATTGAG_F	T	A	.	.	NS=5;AF=0.033	GT	.	0	0	.	.	.	.	.	.	1	0	.	.	.	.	.	.	.	.	.	.	.	.	.	.	.	.	.	0	.
1	460803	AAAAACCGA.GGTCGTTCC_R	C	A	.	.	NS=19;AF=0.300	GT	0	0	0	0	.	.	.	0	.	0	0	.	.	.	.	1	1	1	1	1	1	1	1	1	.	0	.	0	0	.
1	2155297	AAAAACCGC.AAAACGGCG_R	G	A	.	.	NS=27;AF=0.067	GT	1	0	0	0	0	.	0	0	1	0	0	0	0	0	0	0	0	0	0	0	0	0	0	0	0	0	0	.	0	.
1	2012630	AAAAACCGC.ATGAACAAA_R	T	C	.	.	NS=6;AF=0.100	GT	1	1	1	.	.	.	.	0	.	.	0	.	.	.	.	.	.	.	.	.	.	.	.	.	.	.	.	.	0	.
1	701377	AAAAACCGC.CAGTCCGTG_R	G	A,C	.	.	NS=9;AF=0.033,0.100	GT	2	2	2	.	1	0	0	0	.	.	0	.	.	.	.	.	.	.	.	.	.	.	.	.	.	.	.	.	0	.
1	3491785	AAAAACCGC.CTTAAACAG_F	G	A	.	.	NS=9;AF=0.067	GT	.	.	.	0	0	0	1	0	1	0	0	.	.	.	.	.	.	.	.	.	.	.	.	.	.	.	.	.	0	.
1	775539	AAAAACCGC.TCACAGCGG_R	G	A	.	.	NS=5;AF=0.033	GT	.	.	.	.	.	.	.	0	.	.	0	0	1	.	.	.	.	.	.	.	.	.	.	.	.	.	.	.	0	.
1	947995	AAAAACCGG.CAACTGCTG_F	A	G	.	.	NS=4;AF=0.033	GT	.	.	.	.	.	.	.	0	1	.	0	.	.	.	.	.	.	.	.	.	.	.	.	.	.	.	.	.	0	.
1	27664	AAAAACCGG.CACGTCAGC_F	A	G,T	.	.	NS=19;AF=0.233,0.300	GT	.	.	.	.	1	.	.	0	.	1	0	1	1	1	1	2	2	2	2	2	2	2	2	2	1	.	.	.	0	.
1	1923674	AAAAACCGG.CACTGGGAC_F	C	T	.	.	NS=29;AF=0.067	GT	0	0	0	0	0	.	0	0	0	0	0	0	0	0	0	0	0	0	0	0	1	1	0	0	0	0	0	0	0	0
1	3213492	AAAAACCGG.CAGAATATT_R	T	G	.	.	NS=4;AF=0.033	GT	.	.	.	.	.	.	1	0	.	.	0	.	.	.	.	.	.	.	.	.	.	.	.	.	.	.	.	.	0	.
1	1979151	AAAAACCGG.CAGTTTGAA_F	T	A,C	.	.	NS=6;AF=0.033,0.067	GT	.	.	.	.	1	.	.	.	.	2	0	.	.	.	.	.	.	.	.	.	.	.	.	.	.	.	2	.	0	0
1	3468975	AAAAACCGG.GATTATCGC_R	G	A	.	.	NS=15;AF=0.400	GT	1	1	1	1	1	.	1	0	.	1	0	1	1	1	1	.	.	.	.	.	.	.	.	.	1	.	.	.	0	.
1	3453033	AAAAACCGG.GCGGCACTG_F	T	A,G	.	.	NS=17;AF=0.033,0.300	GT	.	.	.	.	.	.	1	0	.	.	0	0	0	0	.	2	2	2	2	2	2	2	2	2	0	.	.	.	0	.
1	133636	AAAAACCGG.GCGGCAGGC_R	T	C	.	.	NS=2;AF=0.033	GT	.	.	.	.	.	1	.	.	.	.	0	.	.	.	.	.	.	.	.	.	.	.	.	.	.	.	.	.	.	.
1	3507518	AAAAACCGG.GCGGCCGGT_R	A	G,T	.	.	NS=26;AF=0.033,0.333	GT	0	0	0	0	0	.	0	0	.	.	0	0	0	0	2	2	2	2	2	2	2	2	2	2	0	0	1	0	0	.
1	1961561	AAAAACCGG.GGGTTTATC_R	C	G	.	.	NS=8;AF=0.167	GT	.	.	.	.	.	.	.	0	.	.	0	1	1	1	1	.	.	.	.	.	.	.	.	.	1	.	.	.	0	.
1	2547046	AAAAACCGG.TATGCTGAC_R	G	A	.	.	NS=11;AF=0.200	GT	.	.	.	.	.	0	0	0	1	.	0	1	1	1	1	.	.	.	.	.	.	.	.	.	1	.	.	.	0	.
1	3999278	AAAAACCGG.TCATATGAT_R	T	A	.	.	NS=2;AF=0.033	GT	.	.	.	.	.	.	.	1	.	.	0	.	.	.	.	.	.	.	.	.	.	.	.	.	.	.	.	.	.	.
1	1011507	AAAAACCGG.TGGGTTCCG_R	G	A	.	.	NS=9;AF=0.200	GT	.	.	.	.	.	.	.	0	1	.	0	1	1	1	1	.	.	.	.	.	.	.	.	.	1	.	.	.	0	.
1	1128066	AAAAACCGG.TTAACCAGC_F	T	A,C,G	.	.	NS=21;AF=0.033,0.533,0.033	GT	2	2	2	2	2	1	2	0	2	2	0	2	2	2	2	.	.	.	.	.	.	.	.	.	2	2	2	2	0	3
1	4498655	AAAAACCGG.TTTGCACCT_F	T	A,C	.	.	NS=28;AF=0.100,0.033	GT	0	0	0	1	1	2	0	0	0	1	0	0	0	0	0	0	.	0	0	0	0	0	0	0	0	0	0	0	0	.
1	858150	AAAAACCGT.AAAACGCTG_R	C	A,G,T	.	.	NS=11;AF=0.033,0.133,0.033	GT	3	.	.	0	0	.	.	0	.	1	0	2	2	2	2	.	.	.	.	.	.	.	.	.	.	.	.	.	0	.
1	3380304	AAAAACCGT.CTCTGCCCG_R	A	C	.	.	NS=7;AF=0.067	GT	1	.	.	.	.	.	.	0	.	.	0	.	.	1	.	.	.	.	.	.	.	.	.	.	.	.	0	0	0	.
1	411175	AAAAACCGT.GATAAGCTG_R	G	C	.	.	NS=16;AF=0.300	GT	.	.	.	.	.	.	.	0	0	.	0	.	.	.	.	1	1	1	1	1	1	1	1	1	.	0	0	0	0	.
1	2779002	AAAAACCGT.GCCGTGGAA_R	A	G	.	.	NS=4;AF=0.033	GT	.	.	.	.	.	.	.	0	0	.	0	.	.	.	.	.	.	.	.	.	.	.	.	.	.	.	.	.	1	.
1	634750	AAAAACCGT.GGCTTCAAA_F	G	A	.	.	NS=12;AF=0.300	GT	.	.	.	.	.	.	.	0	.	.	0	.	.	.	.	1	1	1	1	1	1	1	1	1	.	.	.	.	0	.
1	3137909	AAAAACCGT.TGTTCAGCT_R	G	A	.	.	NS=22;AF=0.033	GT	0	0	0	0	0	.	0	0	.	0	0	.	.	.	.	0	0	0	0	0	0	0	0	0	.	0	0	.	0	1
1	1052884	AAAAACCTA.ATGACAGGT_R	G	A	.	.	NS=29;AF=0.300	GT	0	0	0	0	0	0	.	0	0	0	0	0	0	0	0	1	1	1	1	1	1	1	1	1	0	0	0	0	0	0
1	786873	AAAAACCTA.CCGGGCGGC_F	T	C	.	.	NS=8;AF=0.033	GT	.	.	.	.	.	0	.	0	.	.	0	.	.	.	.	.	.	.	.	.	.	.	.	.	.	0	0	0	0	1
1	313847	AAAAACCTA.CGCGATCTG_F	T	C	.	.	NS=12;AF=0.333	GT	.	.	.	.	.	.	.	1	.	0	0	1	1	1	1	.	.	.	.	.	.	.	.	.	1	1	1	1	1	.
1	460681	AAAAACCTA.GTGCCTAAA_F	T	C	.	.	NS=3;AF=0.067	GT	.	.	.	.	.	.	.	1	.	.	0	.	.	.	.	.	.	.	.	.	.	.	.	.	.	.	.	.	1	.
1	3958093	AAAAACCTA.GTGCTGCTG_R	A	G	.	.	NS=17;AF=0.467	GT	.	.	.	.	.	.	.	0	.	.	0	1	1	1	1	1	1	1	1	1	1	1	1	1	1	.	.	.	0	.
1	2066492	AAAAACCTA.GTTCAGGAT_R	A	G	.	.	NS=7;AF=0.133	GT	.	.	.	1	1	.	.	0	1	1	0	.	.	.	.	.	.	.	.	.	.	.	.	.	.	.	.	.	0	.
1	999770	AAAAACCTC.ACGGCGGGT_R	G	A	.	.	NS=27;AF=0.167	GT	0	0	0	0	0	.	0	0	.	0	0	1	1	1	1	0	0	0	0	0	0	0	0	0	1	0	0	0	0	.
1	1861022	AAAAACCTC.CCCTTTGCA_F	G	T	.	.	NS=4;AF=0.033	GT	.	.	.	.	.	.	.	0	.	.	0	.	.	.	.	.	.	.	.	.	.	.	.	.	.	1	.	.	0	.
1	4485459	AAAAACCTC.GACGACACC_F	T	A	.	.	NS=5;AF=0.033	GT	.	.	.	.	.	.	.	.	.	.	0	.	.	.	.	.	.	.	.	.	.	.	.	.	.	0	0	1	0	.
1	3369339	AAAAACCTC.GGTAACGCG_R	G	T	.	.	NS=24;AF=0.033	GT	0	.	.	.	1	0	0	.	.	0	0	0	0	0	0	0	0	0	0	0	0	0	0	0	0	0	0	0	0	.
1	2275737	AAAAACCTG.ACCCCGCCG_R	G	A	.	.	NS=11;AF=0.033	GT	.	0	0	1	0	.	.	0	.	0	0	.	.	.	.	.	.	.	.	.	.	.	.	.	.	0	0	0	0	.
1	1323087	AAAAACCTG.CGCCGTGTT_R	T	G	.	.	NS=12;AF=0.033	GT	.	.	.	.	.	.	.	0	.	.	0	.	.	.	.	0	0	0	0	0	0	0	1	0	.	.	.	.	0	.
1	3331243	AAAAACCTG.CGCGTATTG_R	C	T	.	.	NS=16;AF=0.033	GT	0	0	0	.	.	.	.	0	1	.	0	.	.	.	.	0	0	0	0	0	0	0	0	0	.	.	.	.	0	.
1	3767633	AAAAACCTG.TTCTTTACA_F	C	T	.	.	NS=3;AF=0.033	GT	.	.	.	.	.	.	.	1	.	.	0	.	.	.	.	.	.	.	.	.	.	.	.	.	.	.	.	.	0	.
1	205893	AAAAACCTG.TTGCCTATC_F	A	G	.	.	NS=8;AF=0.133	GT	.	.	.	.	.	.	.	0	0	.	0	.	.	.	.	1	.	.	.	.	1	1	1	.	.	.	.	.	0	.
1	198209	AAAAACCTT.ATGATCTGG_F	T	C	.	.	NS=10;AF=0.167	GT	.	.	0	.	.	.	0	0	1	.	0	.	.	.	.	.	.	.	.	.	.	.	.	.	.	1	1	1	0	1
1	667971	AAAAACCTT.GAAGTTCTG_F	C	T	.	.	NS=28;AF=0.033	GT	0	0	0	0	0	0	0	0	0	0	0	0	0	0	0	0	0	0	0	0	0	0	0	0	.	0	0	.	0	1
1	2087456	AAAAACGAA.ACCATCGAA_F	A	G	.	.	NS=8;AF=0.067	GT	0	0	0	.	.	.	.	0	.	.	0	.	.	.	.	.	.	.	.	.	.	.	.	.	.	1	1	.	0	.
1	2409080	AAAAACGAA.GTTGATATT_R	C	T	.	.	NS=3;AF=0.033	GT	.	.	.	.	.	.	.	1	.	.	0	.	.	.	.	.	.	.	.	.	.	.	.	.	.	.	.	.	0	.
1	1957870	AAAAACGAC.GCATCGGGA_R	C	A	.	.	NS=4;AF=0.033	GT	.	.	.	.	.	.	.	0	.	.	0	.	.	.	.	.	.	.	.	.	.	.	.	.	.	.	.	.	0	1
1	4625501	AAAAACGAG.CCGACGGCA_F	C	G	.	.	NS=4;AF=0.067	GT	.	.	.	1	1	.	.	.	.	.	0	.	.	.	.	.	.	.	.	.	.	.	.	.	.	.	.	.	0	.
1	3953797	AAAAACGAT.CCCGGCTGG_F	G	C	.	.	NS=28;AF=0.033	GT	0	0	0	0	0	0	1	0	.	0	0	0	0	0	0	0	0	0	0	0	0	0	0	0	0	0	0	0	0	.
1	3922424	AAAAACGAT.TGCTGCGTT_R	G	A	.	.	NS=7;AF=0.067	GT	.	.	.	0	0	.	.	0	.	.	0	.	.	.	.	.	.	.	.	.	.	.	.	.	.	1	0	1	.	.
1	1894696	AAAAACGCA.ACGGCGCAT_F	C	T	.	.	NS=29;AF=0.033	GT	0	0	0	0	0	0	.	0	0	0	0	0	0	0	1	0	0	0	0	0	0	0	0	0	0	0	0	0	0	0
1	87781	AAAAACGCA.ATGAGTTTT_R	G	C	.	.	NS=4;AF=0.033	GT	.	.	.	.	.	1	.	0	.	.	0	.	.	.	.	.	.	.	.	.	.	.	.	.	.	.	.	.	0	.
1	4142028	AAAAACGCA.GAGTCTCTT_F	C	G,T	.	.	NS=24;AF=0.033,0.067	GT	.	.	.	2	2	.	.	0	1	0	0	0	0	0	0	0	0	0	0	0	0	0	0	0	0	0	0	0	0	.
1	1165973	AAAAACGCC.CTGACACCG_F	C	T	.	.	NS=4;AF=0.033	GT	.	.	.	.	.	.	.	0	.	.	0	.	.	.	.	.	.	.	.	.	.	.	1	.	.	.	.	.	0	.
1	3924272	AAAAACGCC.CTGCCGCCT_F	G	A	.	.	NS=4;AF=0.067	GT	.	.	.	1	1	.	.	0	.	.	0	.	.	.	.	.	.	.	.	.	.	.	.	.	.	.	.	.	.	.
1	1999187	AAAAACGCC.GCAATGTAC_F	A	G	.	.	NS=7;AF=0.033	GT	.	.	.	.	.	.	.	0	.	1	0	.	.	.	.	.	.	.	.	.	.	.	.	.	.	0	0	0	0	.
1	3296162	AAAAACGCC.GCAGGAGAT_R	T	A	.	.	NS=27;AF=0.033	GT	0	0	0	1	0	0	0	0	0	.	0	.	0	0	.	0	0	0	0	0	0	0	0	0	0	0	0	0	0	0
1	3440588	AAAAACGCC.GCCAGTTTT_F	A	G	.	.	NS=3;AF=0.033	GT	0	.	.	.	.	.	.	.	1	.	0	.	.	.	.	.	.	.	.	.	.	.	.	.	.	.	.	.	.	.
1	2016154	AAAAACGCC.GTTAAATGC_F	C	T	.	.	NS=7;AF=0.200	GT	1	.	.	.	.	.	.	.	.	.	0	1	1	1	1	.	.	.	.	.	.	.	.	.	1	.	.	.	.	.
1	1428124	AAAAACGCC.TAAATCAAA_R	T	C	.	.	NS=4;AF=0.033	GT	.	.	.	.	.	.	.	0	.	1	0	.	.	.	.	.	.	.	.	.	.	.	.	.	.	.	.	.	0	.
1	3897998	AAAAACGCC.TACAAAGTA_F	T	C,G	.	.	NS=29;AF=0.133,0.100	GT	0	0	0	1	1	1	1	0	0	2	0	0	0	0	0	0	0	0	0	0	0	0	0	0	0	2	0	2	0	.
1	758442	AAAAACGCC.TCTTCACGG_F	C	A,G	.	.	NS=11;AF=0.033,0.067	GT	0	2	2	.	.	.	.	0	1	.	0	0	0	0	0	.	.	.	.	.	.	.	.	.	.	.	.	.	0	.
1	3400562	AAAAACGCC.TTCCACTTC_F	G	C	.	.	NS=8;AF=0.167	GT	1	.	1	1	1	.	.	0	1	.	0	.	.	.	.	.	.	.	.	.	.	.	.	.	.	.	.	.	0	.
1	200167	AAAAACGCC.TTTATCATC_F	G	C	.	.	NS=3;AF=0.033	GT	.	.	.	.	.	.	.	1	.	.	0	.	.	.	.	.	.	.	.	.	.	.	.	.	.	.	.	.	0	.
1	2373905	AAAAACGCG.ACGCTCTCG_R	C	G,T	.	.	NS=13;AF=0.033,0.033	GT	0	0	0	0	0	.	1	0	.	0	0	.	.	.	.	.	.	.	.	.	.	.	.	.	.	2	0	0	0	.
1	2637917	AAAAACGCG.CCCGAAGGC_F	A	G	.	.	NS=21;AF=0.567	GT	1	1	1	1	.	.	.	0	0	1	0	.	.	.	.	1	1	1	1	1	1	1	1	1	.	1	1	1	0	.
1	2980610	AAAAACGCG.CGCCGGAGG_R	C	T	.	.	NS=2;AF=0.033	GT	.	.	.	.	.	.	.	1	.	.	0	.	.	.	.	.	.	.	.	.	.	.	.	.	.	.	.	.	.	.
1	3189130	AAAAACGCG.TGCTGGGCA_F	G	C	.	.	NS=8;AF=0.067	GT	0	.	0	1	1	.	.	.	.	.	0	.	.	.	.	.	.	.	.	.	.	.	.	.	.	.	0	.	0	0
1	3859857	AAAAACGCT.AAAAGCCTA_F	G	A	.	.	NS=19;AF=0.167	GT	1	1	1	0	0	1	1	0	0	0	0	0	0	0	0	.	.	.	.	.	.	.	.	.	0	0	0	.	0	.
1	731601	AAAAACGCT.AAACCAAAA_F	A	T	.	.	NS=28;AF=0.367	GT	0	0	0	1	1	0	0	0	0	0	0	0	0	0	0	1	1	1	1	1	1	1	1	1	.	0	0	0	0	.
1	4499168	AAAAACGCT.AATTCACCG_F	G	C	.	.	NS=9;AF=0.100	GT	0	0	0	.	.	.	.	0	.	.	0	.	.	.	.	.	.	.	.	.	.	.	.	.	.	1	1	1	0	.
1	1257020	AAAAACGCT.ACAACACAA_F	G	A	.	.	NS=13;AF=0.033	GT	0	0	0	0	0	.	0	0	.	1	0	.	.	.	.	.	.	.	.	.	.	.	.	.	.	0	0	0	0	.
1	253030	AAAAACGCT.AGCAACGGC_F	C	T	.	.	NS=20;AF=0.067	GT	0	0	0	0	0	.	.	0	.	0	0	0	.	0	0	.	.	0	0	0	.	.	0	0	0	1	1	.	0	.
1	3566911	AAAAACGCT.AGCCTCATC_F	A	G	.	.	NS=29;AF=0.033	GT	0	0	0	0	0	.	0	0	0	0	0	0	0	0	0	0	0	0	0	0	0	0	0	0	0	0	0	0	0	1
1	1001527	AAAAACGCT.CTGACCGTT_F	G	T	.	.	NS=7;AF=0.033	GT	.	.	.	.	.	.	0	0	.	.	0	.	.	.	.	.	.	.	.	.	.	.	.	.	.	0	0	0	1	.
1	3275850	AAAAACGCT.GAATCCCGC_F	T	G	.	.	NS=13;AF=0.400	GT	1	1	1	1	1	.	1	1	.	1	0	.	.	.	.	.	.	.	.	.	.	.	.	.	.	1	1	1	1	.
1	1418076	AAAAACGCT.GCCGGGGAC_F	C	T	.	.	NS=20;AF=0.200	GT	0	0	0	0	0	0	0	0	1	0	0	1	1	1	1	.	.	.	.	.	.	.	.	.	1	0	0	0	0	.
1	1647978	AAAAACGCT.GGCAGCGAG_F	C	G	.	.	NS=4;AF=0.033	GT	.	.	.	.	.	1	.	0	.	.	0	.	.	.	.	.	.	.	.	.	.	.	.	.	.	.	.	.	0	.
1	3128104	AAAAACGCT.GTCAGCACC_R	C	A	.	.	NS=2;AF=0.033	GT	.	.	.	.	.	.	.	.	1	.	0	.	.	.	.	.	.	.	.	.	.	.	.	.	.	.	.	.	.	.
1	1897966	AAAAACGCT.TCGGCGCGC_F	G	C	.	.	NS=28;AF=0.033	GT	0	0	0	0	0	.	0	0	.	0	0	0	0	0	0	0	0	0	0	0	0	0	0	0	0	0	0	0	0	1
1	3667765	AAAAACGCT.TGGCAACAA_R	G	A	.	.	NS=29;AF=0.033	GT	0	0	0	0	0	.	0	0	0	0	0	0	0	0	0	0	0	0	0	0	0	0	0	0	0	0	0	1	0	0
1	1727478	AAAAACGGA.AAAGACTCG_R	G	A	.	.	NS=13;AF=0.133	GT	1	1	1	0	0	.	1	0	.	0	0	.	.	.	.	.	.	.	.	.	.	.	.	.	.	0	0	0	0	.
1	4075040	AAAAACGGC.ATGGTCAGA_R	A	G	.	.	NS=26;AF=0.600	GT	1	1	1	1	1	0	0	0	.	1	0	0	0	0	.	1	1	1	1	1	1	1	1	1	.	1	1	1	0	.
1	4156722	AAAAACGGC.CAGATAAAC_R	A	C,T	.	.	NS=29;AF=0.033,0.100	GT	2	2	2	0	0	1	0	0	0	0	0	0	0	0	0	0	0	0	0	0	0	0	0	0	0	0	0	0	0	.
1	2080738	AAAAACGGC.CCTTTGCAG_F	G	A	.	.	NS=17;AF=0.300	GT	1	0	0	.	.	.	.	0	.	1	0	.	.	.	.	0	0	0	1	1	1	1	.	1	.	1	1	.	0	.
1	1322991	AAAAACGGC.CGCCAACGA_F	G	A	.	.	NS=28;AF=0.733	GT	1	1	1	1	1	.	1	0	1	1	0	1	1	1	1	1	1	1	1	1	1	1	1	1	1	0	0	0	0	.
1	4381703	AAAAACGGC.GTAGTTTAC_F	T	A	.	.	NS=30;AF=0.067	GT	0	0	0	1	0	0	0	0	0	0	0	0	0	0	0	0	0	0	0	0	0	0	0	0	0	0	0	0	0	1
1	25758	AAAAACGGC.TGGGCTGAC_F	G	A	.	.	NS=8;AF=0.033	GT	0	0	0	.	.	.	0	0	1	.	0	.	.	.	.	.	.	.	.	.	.	.	.	.	.	.	.	.	0	.
1	848562	AAAAACGGC.TTGACGGCG_F	G	A	.	.	NS=11;AF=0.067	GT	0	0	0	.	.	.	.	1	.	0	0	0	0	0	0	.	.	.	.	.	.	.	.	.	.	.	.	.	1	.
1	341474	AAAAACGGG.CTTGCATAG_R	A	C,G	.	.	NS=15;AF=0.067,0.033	GT	0	0	0	0	0	.	2	0	.	0	0	1	.	.	.	.	.	.	.	.	.	.	.	.	1	0	0	0	0	.
1	1587128	AAAAACGGG.GAAATCCCT_F	C	T	.	.	NS=4;AF=0.033	GT	.	.	.	.	.	.	.	0	1	.	0	.	.	.	.	.	.	.	.	.	.	.	.	.	.	.	.	.	0	.
1	3083330	AAAAACGGT.AAACGCTGA_R	A	C	.	.	NS=7;AF=0.033	GT	0	0	0	.	.	.	1	0	.	.	0	.	.	.	.	.	.	.	.	.	.	.	.	.	.	.	.	.	0	.
1	3372919	AAAAACGGT.CGAAAGAAA_F	T	G	.	.	NS=13;AF=0.300	GT	.	.	.	.	.	.	.	0	0	.	0	.	.	.	.	1	1	1	1	1	1	1	1	1	.	.	.	.	0	.
1	339081	AAAAACGGT.GAACAAAGA_R	G	A	.	.	NS=26;AF=0.167	GT	0	0	0	0	0	.	0	0	0	.	0	1	1	1	1	0	.	0	0	0	0	0	0	0	1	0	0	0	0	.
1	1921381	AAAAACGGT.TCATCGGCG_R	T	C	.	.	NS=12;AF=0.267	GT	.	.	.	1	1	.	.	0	0	1	0	1	1	1	1	.	.	.	.	.	.	.	.	.	1	.	.	.	0	.
1	966532	AAAAACGGT.TCCCGGTAG_F	A	G	.	.	NS=2;AF=0.033	GT	.	.	.	.	.	.	.	1	.	.	0	.	.	.	.	.	.	.	.	.	.	.	.	.	.	.	.	.	.	.
1	2766723	AAAAACGGT.TCTCTCAGC_R	T	C	.	.	NS=4;AF=0.033	GT	.	.	.	.	.	.	.	0	.	.	0	.	.	.	.	.	.	.	.	.	.	.	.	.	.	1	.	.	0	.
1	3389141	AAAAACGTA.CATCATTGT_F	T	C	.	.	NS=6;AF=0.100	GT	.	.	.	.	.	.	.	0	.	.	0	.	.	.	.	.	.	.	.	.	.	.	.	.	.	1	1	1	0	.
1	4257514	AAAAACGTC.CTTCCCTGT_F	C	T	.	.	NS=3;AF=0.033	GT	.	.	.	.	.	.	.	1	.	.	0	.	.	.	.	.	.	.	.	.	.	.	.	.	.	.	.	.	0	.
1	1291155	AAAAACGTC.GCCAGCGCC_F	A	T	.	.	NS=9;AF=0.200	GT	1	1	.	.	.	.	1	0	.	.	0	.	.	.	.	.	.	.	.	.	.	.	.	.	.	1	1	1	0	.
1	1952404	AAAAACGTC.GTATAGAAA_R	G	C	.	.	NS=10;AF=0.133	GT	.	.	.	1	1	1	.	0	.	1	0	.	.	.	.	.	.	.	.	.	.	.	.	.	.	0	0	0	0	.
1	154474	AAAAACGTC.GTGTAGAAA_F	G	C	.	.	NS=4;AF=0.033	GT	.	.	.	.	.	.	.	0	1	.	0	.	.	.	.	.	.	.	.	.	.	.	.	.	.	.	.	.	0	.
1	1949323	AAAAACGTG.CGATCGACA_F	G	A	.	.	NS=29;AF=0.367	GT	0	0	0	1	1	.	1	0	0	0	0	1	1	1	1	0	0	0	0	0	0	0	0	0	1	1	1	1	0	0
1	2270341	AAAAACGTG.GTGGTGACC_F	G	T	.	.	NS=6;AF=0.100	GT	1	1	.	.	.	.	.	0	.	.	0	.	.	.	.	.	.	.	.	.	.	.	.	.	.	1	.	.	0	.
1	365548	AAAAACGTT.AACGCACGC_R	C	T	.	.	NS=4;AF=0.033	GT	.	.	.	.	.	.	.	0	1	.	0	.	.	.	.	.	.	.	.	.	.	.	.	.	.	.	.	.	0	.
1	307957	AAAAACGTT.GTTTCATCA_R	C	T	.	.	NS=25;AF=0.033	GT	0	0	0	.	.	0	.	0	.	.	0	0	0	0	0	1	0	0	0	0	0	0	0	0	0	0	0	0	0	0
1	1854596	AAAAACGTT.TCCCAGTAT_F	G	A	.	.	NS=10;AF=0.067	GT	0	1	1	.	.	.	.	0	0	.	0	.	.	.	.	.	.	.	.	.	.	.	.	.	.	0	0	0	0	.
1	1907598	AAAAACGTT.TTAATTAAA_R	C	T	.	.	NS=30;AF=0.033	GT	0	0	0	0	0	0	0	0	0	0	0	0	0	0	0	0	0	0	0	0	0	0	0	0	0	0	0	0	0	1
1	4653312	AAAAACTAC.AAAAGTGCT_R	T	C	.	.	NS=30;AF=0.033	GT	0	0	0	0	0	1	0	0	0	0	0	0	0	0	0	0	0	0	0	0	0	0	0	0	0	0	0	0	0	0
1	3851092	AAAAACTAC.CCTGCCCCA_F	A	G	.	.	NS=8;AF=0.033	GT	0	0	0	.	.	.	.	.	.	.	0	.	.	.	.	.	.	.	.	.	.	.	.	.	.	0	0	1	0	.
1	830211	AAAAACTAT.GCCATTAAA_F	A	C	.	.	NS=4;AF=0.033	GT	.	.	.	.	.	1	.	0	.	.	0	.	.	.	.	.	.	.	.	.	.	.	.	.	.	.	.	.	0	.
1	2445192	AAAAACTCA.CACGATTCA_F	C	T	.	.	NS=9;AF=0.100	GT	1	0	0	1	1	.	0	0	.	.	0	.	.	.	.	.	.	.	.	.	.	.	.	.	.	.	.	.	0	.
1	2307004	AAAAACTCA.CGCCGAGGG_F	C	G	.	.	NS=3;AF=0.033	GT	.	.	.	.	.	.	.	1	.	.	0	.	.	.	.	.	.	.	.	.	.	.	.	.	.	.	.	.	0	.
1	2759757	AAAAACTCA.CGGTTTGTA_F	C	T	.	.	NS=25;AF=0.300	GT	0	0	0	.	.	.	0	0	0	0	0	0	0	.	0	1	1	1	1	1	1	1	1	1	0	0	0	0	0	.
1	244927	AAAAACTCA.CTAACACAC_F	T	A	.	.	NS=30;AF=0.033	GT	0	0	0	0	0	0	0	0	0	0	0	0	0	0	0	0	0	0	0	0	0	0	0	0	0	0	0	0	0	1
1	2982774	AAAAACTCA.GCAGGTGCC_R	G	C	.	.	NS=2;AF=0.033	GT	.	.	.	.	.	1	.	.	.	.	0	.	.	.	.	.	.	.	.	.	.	.	.	.	.	.	.	.	.	.
1	2064751	AAAAACTCG.ACTCGGTCA_F	C	A	.	.	NS=19;AF=0.300	GT	.	.	.	.	.	.	.	0	.	.	0	0	0	0	0	1	1	1	1	1	1	1	1	1	0	.	0	0	0	.
1	1828050	AAAAACTCT.ATCGCTGCC_F	C	T	.	.	NS=4;AF=0.033	GT	.	.	.	.	.	.	1	0	.	.	0	.	.	.	.	.	.	.	.	.	.	.	.	.	.	.	.	.	0	.
1	1653704	AAAAACTGA.AAAAACGAC_F	A	T	.	.	NS=6;AF=0.067	GT	.	.	.	.	.	.	.	0	.	.	0	.	.	.	.	.	.	.	.	.	.	.	.	.	.	1	0	1	0	.
1	479457	AAAAACTGA.TGAGAGCGA_F	T	A	.	.	NS=18;AF=0.200	GT	.	.	.	.	.	.	1	0	.	1	0	1	1	.	1	0	0	0	0	0	0	0	0	0	1	.	.	.	0	.
1	1711363	AAAAACTGC.AGTTGTGTG_R	C	T	.	.	NS=5;AF=0.067	GT	.	.	.	.	.	.	.	0	.	.	0	.	.	.	.	.	.	.	1	1	.	.	.	.	.	.	.	.	0	.
1	591998	AAAAACTGC.CGAACGCCT_R	C	A	.	.	NS=3;AF=0.033	GT	.	.	.	.	.	.	.	0	1	.	0	.	.	.	.	.	.	.	.	.	.	.	.	.	.	.	.	.	.	.
1	2153232	AAAAACTGG.CAGGCATAA_R	A	G	.	.	NS=9;AF=0.033	GT	.	.	.	.	.	.	0	0	.	.	0	0	0	0	0	.	.	.	.	.	.	.	.	.	0	.	.	.	1	.
1	3957009	AAAAACTGG.CGCTGATCC_R	G	A	.	.	NS=16;AF=0.033	GT	0	0	0	0	0	.	0	0	1	0	0	0	0	0	0	.	.	.	.	.	.	.	.	.	0	.	.	.	0	.
1	4368041	AAAAACTGG.GCCGTACTA_F	C	T	.	.	NS=21;AF=0.333	GT	0	0	0	.	.	.	0	0	1	0	0	.	.	.	.	1	1	1	1	1	1	1	1	1	.	0	0	0	.	0
1	3738369	AAAAACTGG.TGTTCTTCG_R	G	A	.	.	NS=26;AF=0.367	GT	.	0	0	.	0	1	0	0	1	0	0	0	0	0	0	1	1	1	1	1	1	1	1	1	0	0	0	0	.	.
1	4537120	AAAAACTTG.GACGCTGCG_R	G	A	.	.	NS=2;AF=0.033	GT	.	.	.	.	.	.	.	.	.	.	0	.	.	.	.	.	.	.	.	.	.	.	.	.	.	.	.	.	1	.
1	748513	AAAAACTTT.GTTAACAAT_R	T	A	.	.	NS=15;AF=0.300	GT	0	0	0	.	.	.	.	0	.	.	0	.	.	.	.	1	1	1	1	1	1	1	1	1	.	.	.	.	0	.
1	2658119	AAAAAGAAA.AGCCGTGAA_R	A	G	.	.	NS=20;AF=0.033	GT	0	.	.	.	0	.	0	0	1	0	0	0	0	.	0	0	0	0	0	0	0	0	.	0	0	.	.	.	0	.
1	3222107	AAAAAGAAA.GTTACGTAA_R	C	T	.	.	NS=10;AF=0.200	GT	.	.	.	.	.	.	.	0	0	1	0	1	1	1	1	.	.	.	.	.	.	.	.	.	1	.	.	.	0	.
1	4559036	AAAAAGAAC.GAAAATGAC_R	A	T	.	.	NS=27;AF=0.067	GT	.	0	0	0	0	.	0	0	1	0	0	0	0	0	0	0	.	0	0	0	0	0	0	0	0	0	0	0	0	1
1	2690322	AAAAAGAAC.TCTCCATTT_F	A	G	.	.	NS=10;AF=0.133	GT	0	0	.	0	.	.	.	0	.	0	0	.	.	.	.	1	.	1	1	1	.	.	.	.	.	.	.	.	.	.
1	330230	AAAAAGAAG.CGATCACAA_R	T	C	.	.	NS=19;AF=0.033	GT	0	0	0	0	0	0	1	0	.	0	0	0	0	0	0	.	.	.	.	.	.	.	.	.	0	0	0	0	0	.
1	2674130	AAAAAGAAG.TATTAGTCC_R	C	A	.	.	NS=7;AF=0.300	GT	.	.	.	1	.	.	.	.	.	.	0	.	.	.	.	1	.	1	1	1	.	.	.	1	.	.	.	.	.	.
1	2110328	AAAAAGAAT.ATCTCGCGG_F	A	T	.	.	NS=5;AF=0.100	GT	.	1	1	.	.	.	1	0	.	.	0	.	.	.	.	.	.	.	.	.	.	.	.	.	.	.	.	.	.	.
1	3553244	AAAAAGAAT.CAGCCGGTA_R	C	T	.	.	NS=8;AF=0.167	GT	.	.	.	.	.	.	.	0	.	.	0	1	1	1	1	.	.	.	.	.	.	.	.	.	1	.	.	.	0	.
1	3161693	AAAAAGAAT.CTGCCAGAA_F	G	A	.	.	NS=29;AF=0.033	GT	0	0	0	0	0	0	1	0	0	0	0	0	0	0	0	0	0	0	0	0	0	0	0	0	0	0	0	0	.	0
1	1989926	AAAAAGAAT.TGTTATAAC_R	C	A	.	.	NS=12;AF=0.067	GT	1	0	1	0	0	.	0	0	.	.	0	.	.	.	.	.	.	.	.	.	.	.	.	.	.	0	0	0	0	.
1	1056780	AAAAAGACA.CTAAAAAAC_F	T	A	.	.	NS=27;AF=0.300	GT	0	0	0	0	0	.	0	0	.	0	0	0	0	0	0	1	1	1	1	1	1	1	1	1	0	0	0	0	0	.
1	2814617	AAAAAGACA.TACTTTCTC_R	C	A,G	.	.	NS=20;AF=0.033,0.233	GT	0	0	0	0	0	.	.	0	0	.	0	.	.	.	.	.	2	2	2	2	2	2	2	1	.	0	0	0	0	.
1	1319261	AAAAAGACC.AATGGTCAG_R	G	T	.	.	NS=9;AF=0.233	GT	1	1	1	.	.	.	1	0	.	.	0	.	.	.	.	.	.	.	.	.	.	.	.	.	.	1	1	1	.	.
1	2605050	AAAAAGACC.CGAGCGGTA_R	T	C	.	.	NS=19;AF=0.033	GT	1	0	0	.	.	.	0	0	.	.	0	0	0	0	0	0	0	0	0	0	.	.	0	0	0	.	.	.	0	.
1	1021183	AAAAAGACC.GTACCGATA_R	C	A	.	.	NS=15;AF=0.033	GT	.	.	.	.	.	0	.	0	0	.	0	.	.	.	.	0	0	0	0	0	0	0	0	0	.	.	.	.	0	1
1	1131570	AAAAAGACC.TGCTGCCGC_R	A	C	.	.	NS=3;AF=0.033	GT	.	.	.	.	.	.	.	.	.	.	0	.	.	.	.	.	.	.	.	.	.	.	1	.	.	.	.	.	0	.
1	4503625	AAAAAGACG.AAGCCGAGG_R	T	C	.	.	NS=18;AF=0.200	GT	1	1	1	.	.	.	.	0	0	.	0	.	.	.	.	0	.	0	0	0	0	0	0	0	.	1	1	1	0	.
1	1888735	AAAAAGACG.CAACATTTT_R	C	T	.	.	NS=6;AF=0.033	GT	0	0	0	.	.	.	1	.	.	.	0	.	.	.	.	.	.	.	.	.	.	.	.	.	.	.	.	.	0	.
1	4143652	AAAAAGACG.CTTTCGACG_F	T	C	.	.	NS=26;AF=0.067	GT	0	0	0	.	1	0	0	0	0	0	0	0	0	0	1	0	0	0	.	.	0	0	0	0	0	0	0	0	0	.
1	2494545	AAAAAGAGA.AAAAGGAAC_F	T	G	.	.	NS=5;AF=0.100	GT	1	1	1	.	.	.	.	0	.	.	0	.	.	.	.	.	.	.	.	.	.	.	.	.	.	.	.	.	.	.
1	2003751	AAAAAGAGA.AGCCTGGCG_F	T	C	.	.	NS=2;AF=0.033	GT	.	.	.	.	.	.	1	.	.	.	0	.	.	.	.	.	.	.	.	.	.	.	.	.	.	.	.	.	.	.
1	1380392	AAAAAGAGA.CAACGTCGA_F	A	G	.	.	NS=3;AF=0.033	GT	.	.	.	.	.	.	.	0	.	.	0	.	.	.	.	.	.	.	.	.	.	.	.	.	.	.	.	.	1	.
1	753384	AAAAAGAGA.TTTCGCAGT_F	A	T	.	.	NS=28;AF=0.033	GT	0	0	0	0	0	1	0	0	0	0	0	0	0	0	0	0	0	0	0	0	0	0	0	0	.	0	0	0	0	.
1	1554896	AAAAAGAGC.CAGCAATTT_F	G	A	.	.	NS=20;AF=0.033	GT	0	0	0	.	.	.	1	0	0	.	0	.	.	.	.	0	0	0	0	0	0	0	0	0	.	0	0	0	0	.
1	4440057	AAAAAGAGC.GCGCCACGC_F	T	A	.	.	NS=5;AF=0.067	GT	.	.	.	1	1	.	.	0	.	.	0	.	.	.	.	.	.	.	.	.	.	.	.	.	.	.	.	.	0	.
1	3836864	AAAAAGAGC.TGGTGCCTG_F	A	G	.	.	NS=3;AF=0.033	GT	.	.	.	.	.	.	.	0	.	.	0	.	.	.	.	.	.	.	.	.	.	.	.	.	.	.	.	.	1	.
1	3947099	AAAAAGAGG.CAGTTTCAC_F	C	T	.	.	NS=9;AF=0.133	GT	.	0	0	.	.	.	1	0	.	.	0	.	.	.	.	.	.	.	.	.	.	.	.	.	.	1	1	1	0	.
1	942249	AAAAAGAGG.GATTGATGC_R	G	C	.	.	NS=10;AF=0.267	GT	1	.	.	.	.	.	1	.	.	.	0	1	1	1	1	.	.	.	.	.	.	.	.	.	1	1	.	.	0	.
1	13041	AAAAAGAGG.GCGCCAGCC_F	C	T	.	.	NS=14;AF=0.067	GT	0	0	0	1	1	.	.	0	0	0	0	0	0	0	.	.	.	.	.	.	.	.	.	.	0	.	.	.	0	.
1	4597804	AAAAAGAGT.GCTCAAGGA_F	A	G	.	.	NS=23;AF=0.033	GT	0	0	0	.	.	1	0	0	0	.	0	0	0	0	0	0	0	0	0	0	0	0	0	0	0	.	.	.	0	.
1	4083172	AAAAAGATA.CGGTCAGCG_R	C	T	.	.	NS=17;AF=0.033	GT	0	0	0	0	1	.	0	0	0	.	0	.	.	.	.	0	0	0	.	.	0	0	0	0	.	.	.	.	0	.
1	3218248	AAAAAGATC.AGCATTATC_F	G	A	.	.	NS=27;AF=0.033	GT	0	0	0	0	0	.	0	0	0	0	0	0	0	0	0	1	0	0	0	0	0	0	0	0	0	0	0	.	0	.
1	979036	AAAAAGATC.GCAGGTTCT_R	G	A	.	.	NS=3;AF=0.033	GT	.	.	.	.	.	.	.	1	.	.	0	.	.	.	.	.	.	.	.	.	.	.	.	.	.	.	.	.	0	.
1	226083	AAAAAGATG.AAACGGCGA_F	C	A	.	.	NS=18;AF=0.200	GT	1	1	1	0	0	1	1	0	1	0	0	0	0	.	0	.	.	.	.	.	.	.	.	.	0	0	.	0	0	.
1	2271954	AAAAAGATG.CATACCTGC_R	A	G	.	.	NS=13;AF=0.033	GT	.	.	.	.	.	1	.	0	.	.	0	.	.	.	.	0	0	0	0	0	0	0	0	0	.	.	.	.	0	.
1	3289577	AAAAAGATG.CCATGCGTC_F	G	C	.	.	NS=5;AF=0.067	GT	.	.	.	.	.	.	.	0	1	1	0	.	.	.	.	.	.	.	.	.	.	.	.	.	.	.	.	.	0	.
1	2639670	AAAAAGATG.TTATCTCCG_F	T	C	.	.	NS=19;AF=0.067	GT	0	0	0	.	.	.	0	0	0	.	0	.	.	.	.	0	0	0	0	0	0	0	0	0	.	1	1	.	0	.
1	2042059	AAAAAGATT.ACGGCCTGA_R	G	C	.	.	NS=4;AF=0.033	GT	1	.	.	.	.	.	.	0	.	.	0	.	.	.	.	.	.	.	.	.	.	.	.	.	.	.	.	.	0	.
1	4227481	AAAAAGATT.GCGGTTGAC_R	A	G,T	.	.	NS=15;AF=0.300,0.033	GT	0	0	.	.	.	.	.	0	2	.	0	.	.	.	.	1	1	1	1	1	1	1	1	1	.	.	.	.	0	.
1	1819296	AAAAAGCAC.AATACTCAG_F	A	T	.	.	NS=30;AF=0.033	GT	0	0	0	0	0	0	0	0	1	0	0	0	0	0	0	0	0	0	0	0	0	0	0	0	0	0	0	0	0	0
1	2028107	AAAAAGCAC.AGGGGTTCA_R	T	C	.	.	NS=16;AF=0.433	GT	.	1	1	1	1	.	1	0	.	.	0	1	1	1	1	.	.	.	.	.	.	.	.	.	1	1	1	1	0	.
1	3591371	AAAAAGCAC.ATGGCAAAC_F	C	T	.	.	NS=2;AF=0.033	GT	.	.	.	.	.	.	.	.	.	.	0	.	1	.	.	.	.	.	.	.	.	.	.	.	.	.	.	.	.	.
1	2444935	AAAAAGCAC.CTGGCGAAG_R	C	A,G	.	.	NS=21;AF=0.267,0.100	GT	0	1	1	0	0	.	0	0	.	.	0	.	.	.	.	2	2	1	1	1	1	1	1	2	.	0	0	0	0	.
1	1620424	AAAAAGCAC.GAAATTATT_F	C	A,T	.	.	NS=30;AF=0.300,0.100	GT	0	0	0	0	0	2	2	0	0	0	0	0	0	0	0	1	1	1	1	1	1	1	1	1	0	0	0	0	0	2
1	3818864	AAAAAGCAC.GATCTTGAT_R	T	G	.	.	NS=7;AF=0.133	GT	1	1	1	.	.	.	.	0	1	.	0	.	.	.	.	.	.	.	.	.	.	.	.	.	.	.	.	.	0	.
1	1936239	AAAAAGCAC.GCCAGACTT_F	T	C	.	.	NS=16;AF=0.300	GT	0	0	0	.	.	.	.	0	.	0	0	.	.	.	.	1	1	1	1	1	1	1	1	1	.	.	.	.	0	.
1	1781432	AAAAAGCAG.AAAATGTGT_R	T	C	.	.	NS=28;AF=0.033	GT	0	0	0	0	0	.	1	0	0	0	0	0	0	0	0	0	0	0	0	0	0	0	0	0	0	0	0	0	0	.
1	660409	AAAAAGCAG.AATTCCCAA_F	A	G	.	.	NS=26;AF=0.033	GT	0	0	0	0	0	.	0	0	.	0	0	0	0	0	1	0	0	0	0	0	0	0	0	0	.	.	0	0	0	0
1	2545910	AAAAAGCAG.GAAGACGAC_F	T	C	.	.	NS=4;AF=0.033	GT	.	.	.	.	.	.	1	0	.	.	0	.	.	.	.	.	.	.	.	.	.	.	.	.	.	.	.	.	0	.
1	2014429	AAAAAGCAG.GCGCATTAT_F	T	A	.	.	NS=29;AF=0.400	GT	.	1	1	0	0	0	1	0	1	0	0	1	1	1	1	0	0	0	0	0	0	0	0	0	1	1	1	1	0	0
1	1917198	AAAAAGCAG.TGGCCTTCC_F	G	A	.	.	NS=24;AF=0.300	GT	0	0	0	0	0	0	0	0	0	0	0	.	.	.	.	1	1	1	1	1	1	1	1	1	.	0	0	0	0	.
1	652568	AAAAAGCAT.AATGCGCAA_R	C	A	.	.	NS=9;AF=0.033	GT	0	0	0	.	.	1	.	0	0	.	0	.	.	.	.	.	.	.	.	.	.	.	.	.	.	.	.	0	0	.
1	4046924	AAAAAGCAT.CTTGTTTAA_R	C	A	.	.	NS=2;AF=0.033	GT	.	.	.	.	.	.	.	.	.	.	0	.	.	.	.	.	.	.	.	.	.	.	.	.	.	.	.	.	1	.
1	187676	AAAAAGCAT.GGTCCGGAC_R	T	A	.	.	NS=16;AF=0.433	GT	1	.	.	.	.	.	.	0	.	.	0	.	.	.	.	1	1	1	1	1	1	1	1	1	.	1	1	1	0	.
1	2323291	AAAAAGCAT.TCGCTGACC_R	T	C	.	.	NS=4;AF=0.033	GT	.	.	.	.	.	.	1	0	.	.	0	.	.	.	.	.	.	.	.	.	.	.	.	.	.	.	.	.	0	.
1	2180208	AAAAAGCCA.ATTCCCGGC_F	C	A	.	.	NS=8;AF=0.167	GT	.	.	.	.	.	.	.	0	.	.	0	1	1	1	1	.	.	.	.	.	.	.	.	.	1	.	.	.	0	.
1	3371841	AAAAAGCCA.CACCGCCGG_F	T	A,C	.	.	NS=5;AF=0.033,0.067	GT	.	.	.	.	1	.	.	2	.	2	0	.	.	.	.	.	.	.	.	.	.	.	.	.	.	.	.	.	0	.
1	1173808	AAAAAGCCA.CAGCAACAG_F	T	C	.	.	NS=3;AF=0.067	GT	.	.	.	.	.	.	.	1	.	.	0	.	.	.	.	.	.	.	.	.	.	.	.	.	.	.	.	.	1	.
1	32207	AAAAAGCCA.CCTGCCCAC_F	A	G	.	.	NS=6;AF=0.133	GT	.	.	.	.	.	.	.	0	.	.	0	1	1	.	1	.	.	.	.	.	.	.	.	.	1	.	.	.	.	.
1	2197850	AAAAAGCCA.CGCGGTGAG_R	T	C	.	.	NS=2;AF=0.033	GT	.	.	.	.	.	.	.	.	.	.	0	.	.	.	.	.	.	.	.	.	.	.	.	.	.	.	.	1	.	.
1	97435	AAAAAGCCA.CGTCCTTAC_R	G	A	.	.	NS=6;AF=0.100	GT	.	.	.	1	1	.	.	0	.	1	0	.	.	.	.	.	.	.	.	.	.	.	.	.	.	.	.	.	0	.
1	1638861	AAAAAGCCA.GAAAGGGTG_F	G	T	.	.	NS=19;AF=0.033	GT	0	0	0	0	0	1	0	0	0	0	0	0	0	0	.	.	.	.	.	.	.	.	.	.	0	0	0	0	0	.
1	4051285	AAAAAGCCA.TCGTTAGAG_R	A	G	.	.	NS=3;AF=0.033	GT	.	.	.	.	.	.	.	.	.	.	0	.	.	.	.	.	.	.	.	.	.	.	.	.	.	.	.	.	0	1
1	4680532	AAAAAGCCC.CTTCACTTT_F	C	A	.	.	NS=3;AF=0.033	GT	.	.	.	.	.	.	.	1	.	.	0	.	.	.	.	.	.	.	.	.	.	.	.	.	.	.	.	.	0	.
1	4160017	AAAAAGCCC.GACGATGAA_F	C	T	.	.	NS=28;AF=0.033	GT	0	0	0	0	0	.	0	0	1	0	0	0	0	0	0	.	0	0	0	0	0	0	0	0	0	0	0	0	0	0
1	2442223	AAAAAGCCC.GCAACACGT_R	A	G	.	.	NS=27;AF=0.267	GT	.	0	0	.	.	1	0	0	0	1	0	1	1	1	1	0	0	0	0	0	0	0	0	0	1	0	0	0	0	1
1	4354011	AAAAAGCCC.GCCGTGGCA_F	C	T	.	.	NS=6;AF=0.100	GT	.	.	.	.	.	.	.	0	1	.	0	1	.	1	.	.	.	.	.	.	.	.	.	.	.	.	.	.	0	.
1	1466333	AAAAAGCCG.AAATCAGGC_F	C	T	.	.	NS=15;AF=0.033	GT	0	.	0	.	.	.	.	0	1	.	0	.	.	.	.	0	0	0	0	0	0	0	0	0	.	.	.	.	0	.
1	3025862	AAAAAGCCG.AGACATCGC_R	C	T	.	.	NS=13;AF=0.033	GT	0	0	0	.	.	.	0	0	0	.	0	.	.	.	1	.	.	.	.	.	.	.	.	.	.	0	0	0	0	0
1	2844695	AAAAAGCCG.ATTCAGCGG_R	A	C	.	.	NS=4;AF=0.033	GT	.	.	.	.	.	.	1	0	.	.	0	.	.	.	.	.	.	.	.	.	.	.	.	.	.	.	.	.	0	.
1	2372948	AAAAAGCCG.CCCATGTAG_R	G	A	.	.	NS=3;AF=0.033	GT	.	.	.	.	.	.	.	1	.	.	0	.	.	.	.	.	.	.	.	.	.	.	.	.	.	.	.	.	0	.
1	1929867	AAAAAGCCG.GTCGAAAAC_F	T	C	.	.	NS=25;AF=0.033	GT	.	0	0	.	.	0	1	0	0	.	0	0	0	0	0	0	0	0	0	0	0	0	0	0	0	0	0	0	0	.
1	3058467	AAAAAGCCG.TGTTTATGA_R	G	A	.	.	NS=19;AF=0.167	GT	0	0	0	0	0	.	0	0	0	0	0	1	1	1	1	.	.	.	.	.	.	.	.	.	1	0	0	0	0	.
1	4057758	AAAAAGCCG.TTATTCCTT_F	C	T	.	.	NS=12;AF=0.333	GT	.	1	1	1	1	.	.	.	.	1	0	1	1	1	1	.	.	.	.	.	.	.	.	.	1	.	.	.	0	.
1	42957	AAAAAGCCT.CGCCGGTGT_R	T	A	.	.	NS=4;AF=0.033	GT	.	.	.	.	.	0	.	1	.	.	0	.	.	.	.	.	.	.	.	.	.	.	.	.	.	.	.	.	0	.
1	3143234	AAAAAGCCT.TAACTTCAA_R	T	C	.	.	NS=6;AF=0.100	GT	.	.	.	.	1	.	1	0	.	.	0	.	.	.	.	.	.	.	.	.	.	.	.	.	.	1	.	.	0	.
1	3165216	AAAAAGCCT.TTTAACACT_R	G	C	.	.	NS=2;AF=0.033	GT	.	.	.	.	.	.	.	.	1	.	0	.	.	.	.	.	.	.	.	.	.	.	.	.	.	.	.	.	.	.
1	378363	AAAAAGCGA.AACAGCGAA_R	A	T	.	.	NS=13;AF=0.033	GT	.	0	0	0	0	.	1	0	0	0	0	.	.	.	.	.	.	.	.	.	.	.	.	.	.	0	0	0	0	.
1	1583965	AAAAAGCGA.AGCTGGACG_F	T	C,G	.	.	NS=8;AF=0.033,0.133	GT	.	1	.	.	.	.	.	0	2	.	0	.	.	.	.	.	.	.	.	.	.	.	.	.	.	2	2	2	0	.
1	3917998	AAAAAGCGA.CCGCCTGAA_R	C	T	.	.	NS=2;AF=0.033	GT	.	.	.	.	.	.	.	1	.	.	0	.	.	.	.	.	.	.	.	.	.	.	.	.	.	.	.	.	.	.
1	1386279	AAAAAGCGA.CGATGTTAA_R	T	A	.	.	NS=3;AF=0.067	GT	.	.	.	.	.	.	.	1	.	.	0	.	.	.	.	.	.	.	.	.	.	.	.	.	.	.	.	.	1	.
1	2688021	AAAAAGCGA.CTGGACTTA_R	A	T	.	.	NS=4;AF=0.067	GT	.	.	.	1	1	.	.	0	.	.	0	.	.	.	.	.	.	.	.	.	.	.	.	.	.	.	.	.	.	.
1	16253	AAAAAGCGA.GATAACCAC_F	C	T	.	.	NS=13;AF=0.033	GT	0	0	0	0	0	.	0	0	1	0	0	.	.	.	.	.	.	.	.	.	.	.	.	.	.	0	0	0	.	.
1	2547476	AAAAAGCGA.GCAGTGGGA_R	G	A	.	.	NS=3;AF=0.033	GT	.	.	.	.	.	.	.	0	.	.	0	.	.	.	.	.	.	.	.	.	.	.	.	.	.	.	.	.	1	.
1	1147247	AAAAAGCGC.ACTCGGGGG_R	A	G	.	.	NS=28;AF=0.033	GT	0	0	0	0	0	0	0	0	.	1	0	0	0	0	0	0	0	0	0	0	0	0	0	0	0	0	0	0	0	.
1	974404	AAAAAGCGC.GAAACATTT_R	A	G	.	.	NS=2;AF=0.033	GT	.	1	.	.	.	.	.	.	.	.	0	.	.	.	.	.	.	.	.	.	.	.	.	.	.	.	.	.	.	.
1	3200556	AAAAAGCGC.GAATAGTGC_R	A	G	.	.	NS=25;AF=0.300	GT	0	0	0	0	0	.	0	0	0	0	0	0	0	0	0	1	1	1	1	1	1	1	1	1	0	.	.	.	0	.
1	2574871	AAAAAGCGC.TTGCGCGCA_F	C	G	.	.	NS=26;AF=0.100	GT	0	0	0	.	.	.	0	0	0	.	0	0	0	0	0	0	0	0	0	0	0	0	0	0	0	1	1	1	0	0
1	2406632	AAAAAGCGC.TTTATCACC_R	T	C	.	.	NS=2;AF=0.033	GT	.	.	.	.	.	.	.	1	.	.	0	.	.	.	.	.	.	.	.	.	.	.	.	.	.	.	.	.	.	.
1	1120661	AAAAAGCGC.TTTTGATAA_F	A	G	.	.	NS=18;AF=0.067	GT	.	1	1	.	0	.	.	.	0	.	0	.	.	.	.	0	0	0	0	0	0	0	0	0	.	0	0	0	0	.
1	2399489	AAAAAGCGG.ATCAGGCTG_F	G	A	.	.	NS=10;AF=0.033	GT	0	0	0	.	1	.	0	0	.	.	0	.	.	.	.	.	.	.	.	.	.	.	.	.	.	0	0	.	0	.
1	4685123	AAAAAGCGG.CAAATTATA_R	A	T	.	.	NS=30;AF=0.300	GT	0	0	1	1	1	0	0	0	0	1	0	1	1	1	1	0	0	0	0	0	0	0	0	0	1	0	0	0	0	0
1	4285498	AAAAAGCGG.CAGCTCGGA_F	T	C	.	.	NS=3;AF=0.033	GT	.	.	.	.	.	.	.	1	.	.	0	.	.	.	.	.	.	.	.	.	.	.	.	.	.	.	.	.	0	.
1	3673381	AAAAAGCGG.CCCGCGCGA_F	C	T	.	.	NS=10;AF=0.033	GT	1	0	0	.	.	.	0	0	.	0	0	.	.	.	.	.	.	.	.	.	.	.	.	.	.	0	.	0	0	.
1	3706777	AAAAAGCGG.CCGAGATCT_R	C	T	.	.	NS=14;AF=0.167	GT	.	.	.	0	0	0	.	0	.	.	0	1	1	1	1	.	.	.	.	.	.	.	.	.	1	0	0	0	0	.
1	1219573	AAAAAGCGG.CGAAAAGCA_R	C	T	.	.	NS=11;AF=0.167	GT	0	0	0	.	.	.	.	0	.	.	0	1	1	1	1	.	.	.	.	.	.	.	.	.	1	.	.	.	0	.
1	1848057	AAAAAGCGG.GAAGGTGAT_F	T	C	.	.	NS=22;AF=0.033	GT	0	0	0	.	1	.	.	0	.	0	0	0	0	0	0	0	0	0	0	0	0	0	0	0	0	.	.	.	0	.
1	3014423	AAAAAGCGG.TGCCGGTGA_F	C	T	.	.	NS=4;AF=0.033	GT	.	.	.	.	.	.	.	0	1	.	0	.	.	.	.	.	.	.	.	.	.	.	.	.	.	.	.	.	0	.
1	553540	AAAAAGCGT.ACCTTCTGG_F	C	T	.	.	NS=19;AF=0.300	GT	.	0	.	0	0	.	0	0	1	0	0	.	.	.	.	.	1	1	1	1	1	1	1	1	.	0	0	.	0	.
1	2814218	AAAAAGCGT.AGAGCATCA_F	C	A	.	.	NS=8;AF=0.033	GT	.	.	.	0	0	0	.	0	1	0	0	.	.	.	.	.	.	.	.	.	.	.	.	.	.	.	.	.	0	.
1	4472540	AAAAAGCGT.AGTGAACTG_F	G	A,C	.	.	NS=13;AF=0.033,0.167	GT	0	0	0	0	0	.	.	1	.	.	0	2	2	2	2	.	.	.	.	.	.	.	.	.	2	.	.	.	0	.
1	1760971	AAAAAGCGT.ATGCCTTTG_R	C	T	.	.	NS=3;AF=0.033	GT	.	.	.	.	.	.	.	1	.	.	0	.	.	.	.	.	.	.	.	.	.	.	.	.	.	.	.	.	0	.
1	4350096	AAAAAGCGT.GTCTTGCCG_R	G	A,T	.	.	NS=7;AF=0.033,0.100	GT	.	.	.	.	.	.	1	0	.	.	0	.	.	.	.	.	.	.	.	.	.	.	.	.	.	2	2	2	0	.
1	1286375	AAAAAGCGT.TAAAAATAA_R	T	A	.	.	NS=28;AF=0.167	GT	0	0	0	0	0	.	0	0	0	0	0	1	1	1	1	0	0	0	0	0	0	0	0	0	1	0	0	0	0	.
1	1605444	AAAAAGCTA.CACACGAAG_F	C	T	.	.	NS=26;AF=0.700	GT	1	1	1	0	0	.	1	0	1	.	0	1	1	1	1	1	1	1	1	1	1	1	1	1	1	1	1	.	0	.
1	1802642	AAAAAGCTC.ACATGACGC_R	G	A	.	.	NS=8;AF=0.167	GT	.	.	.	.	.	.	.	0	.	.	0	1	1	1	1	.	.	.	.	.	.	.	.	.	1	.	.	.	0	.
1	3800241	AAAAAGCTC.CGGCGCAGA_F	A	G	.	.	NS=14;AF=0.300	GT	.	.	.	0	0	.	.	0	.	.	0	.	.	.	.	1	1	1	1	1	1	1	1	1	.	.	.	.	0	.
1	1038551	AAAAAGCTC.TCCTTTGTT_F	T	C	.	.	NS=29;AF=0.067	GT	0	0	0	1	1	0	0	0	0	0	0	0	0	0	0	0	0	0	0	0	0	0	0	0	0	0	0	0	0	.
1	3272923	AAAAAGCTC.TTACCAACC_F	T	C	.	.	NS=5;AF=0.033	GT	.	.	.	.	.	.	0	0	0	.	0	.	.	.	.	.	.	.	.	.	.	.	.	.	.	.	.	.	1	.
1	1992252	AAAAAGCTG.AGTTCACGC_F	C	A	.	.	NS=9;AF=0.167	GT	1	1	1	.	.	.	0	0	.	1	0	.	.	.	.	.	.	.	.	.	.	.	.	.	.	.	.	1	0	.
1	3722557	AAAAAGCTG.CGTAACAGG_R	T	C	.	.	NS=28;AF=0.300	GT	0	0	0	0	0	0	0	0	.	0	0	0	0	0	0	1	1	1	1	1	1	1	1	1	0	0	0	0	0	.
1	1456771	AAAAAGCTG.GCGTCGCTG_R	C	A,G	.	.	NS=16;AF=0.300,0.133	GT	.	.	.	.	.	.	.	0	.	.	0	1	2	2	2	1	1	1	1	1	1	1	.	1	2	.	.	.	0	.
1	4212086	AAAAAGCTG.GCTAACGCA_R	C	A,G,T	.	.	NS=13;AF=0.167,0.133,0.033	GT	.	.	.	.	.	.	3	.	0	.	0	.	.	.	.	2	1	1	2	2	1	1	2	1	.	.	.	.	0	.
1	2217644	AAAAAGCTG.TGGAAGGGC_F	A	C	.	.	NS=14;AF=0.433	GT	.	1	1	1	1	.	1	1	.	.	0	1	1	1	1	.	.	.	.	.	.	.	.	.	1	1	.	.	1	.
1	732165	AAAAAGCTT.GATAAGTGG_F	C	T	.	.	NS=18;AF=0.033	GT	.	.	.	0	0	1	.	0	0	0	0	0	0	0	0	0	0	.	0	0	0	0	.	.	.	.	.	.	0	.
1	379980	AAAAAGCTT.GCGATTACG_F	T	G	.	.	NS=6;AF=0.100	GT	.	.	.	1	1	.	.	0	.	1	0	.	.	.	.	.	.	.	.	.	.	.	.	.	.	.	.	.	0	.
1	3864163	AAAAAGGAA.CCATCGTCT_F	G	A	.	.	NS=26;AF=0.033	GT	0	0	0	0	0	1	.	0	0	0	0	0	0	.	.	0	0	0	0	0	0	0	0	0	0	0	0	0	0	.
1	2398459	AAAAAGGAG.ACGCCATGC_F	T	A	.	.	NS=10;AF=0.200	GT	0	.	.	.	.	.	1	0	.	.	0	1	1	1	1	.	.	.	.	.	.	.	.	.	1	.	.	.	0	.
1	257292	AAAAAGGAG.TCGTCATGG_R	T	A	.	.	NS=28;AF=0.300	GT	0	0	0	0	0	.	0	0	0	0	0	0	0	0	0	1	1	1	1	1	1	1	1	1	0	0	0	0	0	.
1	974067	AAAAAGGAT.TGATGCCAC_F	T	A	.	.	NS=4;AF=0.033	GT	0	.	.	.	.	.	.	.	.	.	0	.	.	.	1	.	.	.	.	.	.	.	.	.	.	.	.	.	0	.
1	4393583	AAAAAGGCA.AAAATCACT_F	A	G	.	.	NS=21;AF=0.200	GT	.	1	1	0	0	.	1	0	.	0	0	.	.	.	.	0	0	0	0	0	0	0	0	0	.	1	1	1	0	.
1	2440070	AAAAAGGCA.CGGGCTGGT_R	C	T	.	.	NS=7;AF=0.033	GT	.	.	.	.	.	1	.	0	.	.	0	.	.	.	.	.	.	.	.	.	.	.	.	.	.	0	0	0	0	.
1	1693120	AAAAAGGCA.GCTCACCGC_R	G	T	.	.	NS=11;AF=0.133	GT	0	.	.	.	.	.	.	0	.	.	0	1	1	1	.	.	.	.	.	.	.	.	.	.	1	0	0	0	0	.
1	3547143	AAAAAGGCC.CCCGGTGTG_R	G	A	.	.	NS=25;AF=0.267	GT	.	0	0	0	0	.	0	0	.	0	0	0	0	0	0	1	1	.	1	1	1	1	1	1	0	0	0	0	0	.
1	4381386	AAAAAGGCC.CTGCGGCCT_R	A	C	.	.	NS=5;AF=0.133	GT	1	1	1	.	.	.	.	.	.	1	0	.	.	.	.	.	.	.	.	.	.	.	.	.	.	.	.	.	.	.
1	75751	AAAAAGGCC.GCATCAGCG_R	T	G	.	.	NS=5;AF=0.033	GT	.	.	.	.	.	.	.	0	.	1	0	.	.	.	.	.	.	.	.	.	.	.	.	.	.	0	.	.	0	.
1	3200734	AAAAAGGCC.TGCCGGGCC_F	C	G	.	.	NS=10;AF=0.033	GT	0	0	0	.	.	.	0	0	1	.	0	.	.	.	.	.	.	.	.	.	.	.	.	.	.	.	0	0	0	.
1	2378076	AAAAAGGCG.CCGCATTGG_F	A	C	.	.	NS=16;AF=0.033	GT	0	.	0	.	.	0	0	0	.	.	0	0	0	1	0	.	.	.	.	.	.	.	.	.	0	0	0	0	0	0
1	1357276	AAAAAGGCG.CGAAAAGCG_F	T	C	.	.	NS=3;AF=0.067	GT	.	.	.	.	.	.	.	1	.	.	0	.	.	.	.	.	.	.	.	.	.	.	.	.	.	.	.	.	1	.
1	2320597	AAAAAGGCG.CGCGCGCCG_F	G	A	.	.	NS=16;AF=0.100	GT	0	0	0	.	.	.	0	0	.	.	0	.	.	.	.	.	0	.	0	0	0	0	.	0	.	1	1	1	0	.
1	3913777	AAAAAGGCG.CGTGCTGGT_F	C	A	.	.	NS=4;AF=0.033	GT	.	.	.	.	.	.	.	0	.	.	0	.	.	.	.	.	.	.	.	.	.	.	.	.	.	.	.	.	0	1
1	4269208	AAAAAGGCG.GTAAACGCC_R	C	T	.	.	NS=30;AF=0.033	GT	0	0	0	0	0	0	0	0	0	0	0	0	0	0	0	0	0	0	0	0	0	0	0	0	0	0	1	0	0	0
1	961899	AAAAAGGCT.ATCAGGATA_R	C	G	.	.	NS=3;AF=0.067	GT	.	.	.	.	.	.	1	.	1	.	0	.	.	.	.	.	.	.	.	.	.	.	.	.	.	.	.	.	.	.
1	13290	AAAAAGGCT.CTCGCTGGG_F	T	A	.	.	NS=6;AF=0.100	GT	1	1	1	.	.	.	.	0	.	.	0	.	.	.	.	.	.	.	.	.	.	.	.	.	.	.	.	.	0	.
1	3192064	AAAAAGGCT.TTTTTACTC_F	T	C	.	.	NS=11;AF=0.067	GT	.	0	0	1	1	.	.	0	0	.	0	.	.	.	.	.	.	.	.	.	.	.	.	.	.	0	0	0	0	.
1	2537351	AAAAAGGGA.AAATATGAA_F	C	T	.	.	NS=4;AF=0.100	GT	.	.	.	1	1	.	.	.	.	1	0	.	.	.	.	.	.	.	.	.	.	.	.	.	.	.	.	.	.	.
1	1088306	AAAAAGGGA.CGCGATCCC_F	T	C	.	.	NS=12;AF=0.300	GT	.	.	.	.	.	.	.	0	.	.	0	.	.	.	.	1	1	1	1	1	1	1	1	1	.	.	.	.	0	.
1	2174998	AAAAAGGGC.ACGGTTTTC_R	C	T	.	.	NS=13;AF=0.033	GT	.	0	0	0	0	.	1	0	0	0	0	.	.	.	.	.	.	.	.	.	.	.	.	.	.	0	0	0	0	.
1	4141603	AAAAAGGGC.TAAAGCCCA_F	G	A	.	.	NS=30;AF=0.033	GT	0	0	0	0	0	0	0	0	0	0	0	0	0	0	0	0	0	0	0	0	0	0	0	0	0	0	0	0	0	1
1	2878398	AAAAAGGGC.TATTTGTCT_F	G	A	.	.	NS=3;AF=0.067	GT	.	.	.	.	.	.	.	1	.	.	0	.	.	.	.	.	.	.	.	.	.	.	.	.	.	.	.	.	1	.
1	2693725	AAAAAGGGG.ACGCAGAGG_R	C	A	.	.	NS=3;AF=0.067	GT	.	.	.	.	.	.	.	1	.	.	0	.	.	.	.	.	.	.	.	.	.	.	.	.	.	.	.	.	1	.
1	29487	AAAAAGGGG.TGCTCGGCG_R	A	G	.	.	NS=10;AF=0.300	GT	.	1	1	.	.	.	1	1	.	.	0	1	1	1	1	.	.	.	.	.	.	.	.	.	1	.	.	.	.	.
1	4385840	AAAAAGGGG.TTCCCCTGT_R	G	A	.	.	NS=9;AF=0.167	GT	.	.	.	.	.	.	0	0	.	.	0	1	1	1	1	.	.	.	.	.	.	.	.	.	1	.	.	.	0	.
1	2555451	AAAAAGGGT.AACCTCAAT_R	T	C	.	.	NS=29;AF=0.133	GT	.	0	0	0	0	0	0	0	1	0	0	0	0	0	0	0	0	0	0	0	0	0	0	0	0	1	1	1	0	0
1	123206	AAAAAGGGT.TTTCCATGT_F	T	A	.	.	NS=30;AF=0.367	GT	1	1	1	1	1	0	1	0	0	1	0	0	0	0	0	0	0	0	0	0	0	0	0	0	0	1	1	1	0	1
1	3456641	AAAAAGGTG.CGCAACGCG_F	A	T	.	.	NS=5;AF=0.033	GT	.	.	.	.	.	.	0	0	1	.	0	.	.	.	.	.	.	.	.	.	.	.	.	.	.	.	.	.	0	.
1	3979638	AAAAAGGTG.GTATCGGTG_F	G	A	.	.	NS=29;AF=0.033	GT	0	0	0	0	0	1	0	0	0	0	0	0	0	0	0	0	0	0	0	0	0	0	0	0	0	0	0	0	0	.
1	442597	AAAAAGGTG.TAAACAGCC_F	G	A	.	.	NS=13;AF=0.033	GT	.	.	.	.	.	.	.	0	.	.	0	.	.	.	.	0	.	0	0	0	0	0	1	0	.	0	0	.	0	.
1	165222	AAAAAGGTG.TGTTCCCGC_R	G	A	.	.	NS=7;AF=0.033	GT	.	.	.	0	0	.	0	.	1	0	0	.	.	.	.	.	.	.	.	.	.	.	.	.	.	.	.	.	0	.
1	3161342	AAAAAGGTG.TTAACCTCT_F	A	G	.	.	NS=27;AF=0.500	GT	0	.	0	0	0	1	0	0	1	1	0	0	0	0	0	1	1	1	1	1	1	1	1	1	0	1	1	1	.	.
1	3885656	AAAAAGTAA.CCTGCCAGG_R	A	T	.	.	NS=23;AF=0.167	GT	0	0	0	.	.	.	.	0	.	.	0	1	1	1	1	0	0	0	0	0	0	0	0	0	1	0	0	0	0	.
1	1906376	AAAAAGTAC.ATTGTTCAA_R	A	C	.	.	NS=28;AF=0.033	GT	0	0	0	0	0	.	0	0	1	0	0	0	0	0	0	0	0	0	0	0	0	0	0	0	0	0	0	0	0	.
1	1241579	AAAAAGTCC.AATAAAAGC_F	T	C	.	.	NS=3;AF=0.067	GT	.	.	.	.	.	.	.	1	.	.	0	.	.	.	.	.	.	.	.	.	.	.	.	.	.	.	.	.	1	.
1	2895472	AAAAAGTCT.AATCCTTCA_F	G	A	.	.	NS=27;AF=0.100	GT	0	0	0	0	0	.	.	0	0	0	0	0	0	0	0	0	0	0	0	0	0	0	0	0	0	1	1	1	0	.
1	1480896	AAAAAGTGA.CCCCCGCAG_F	A	G	.	.	NS=21;AF=0.100	GT	0	0	0	1	1	0	0	0	0	1	0	.	.	.	.	0	0	0	0	0	0	0	0	0	.	.	.	.	0	.
1	3707252	AAAAAGTGA.CGGTTCAGC_R	G	A	.	.	NS=8;AF=0.033	GT	1	.	0	.	.	.	.	0	.	.	0	.	.	.	.	.	.	.	.	.	.	.	.	.	.	0	0	0	0	.
1	3915031	AAAAAGTGC.TCCAGAGCG_R	T	C	.	.	NS=20;AF=0.633	GT	1	1	1	1	.	.	1	1	.	.	0	.	.	.	.	1	1	1	1	1	1	1	1	1	.	1	1	1	1	.
1	650562	AAAAAGTGC.TGCGGGTGA_R	A	C	.	.	NS=6;AF=0.167	GT	.	.	.	.	.	.	.	1	.	.	0	.	.	.	.	.	.	.	.	.	.	.	.	.	.	1	1	1	1	.
1	3495520	AAAAAGTGC.TTCGCGCGG_F	T	C	.	.	NS=3;AF=0.033	GT	.	.	.	.	.	.	.	1	.	.	0	.	.	.	.	.	.	.	.	.	.	.	.	.	.	.	.	.	0	.
1	3452493	AAAAAGTGT.GATGCAATC_R	C	T	.	.	NS=30;AF=0.567	GT	1	1	1	1	1	1	1	0	0	1	0	1	1	1	1	0	0	0	0	0	0	0	0	0	1	1	1	1	0	1
1	1767109	AAAAAGTGT.TTTTGCTGC_R	T	C	.	.	NS=6;AF=0.100	GT	1	1	1	.	.	.	.	0	0	.	0	.	.	.	.	.	.	.	.	.	.	.	.	.	.	.	.	.	.	.
1	1398069	AAAAAGTTG.TAAGAGAGC_R	T	C	.	.	NS=17;AF=0.033	GT	.	0	0	0	0	0	0	0	0	0	0	0	0	0	0	.	.	.	.	.	.	.	.	.	0	.	.	.	0	1
1	1195860	AAAAATAAA.ACCTTCCCT_R	T	G	.	.	NS=3;AF=0.033	GT	.	.	.	.	.	.	.	.	.	.	0	1	.	.	.	.	.	.	.	.	.	.	.	.	.	.	.	.	0	.
1	1620556	AAAAATAAA.CCGGAATAG_R	C	T	.	.	NS=27;AF=0.300	GT	0	1	0	0	0	.	0	0	0	0	0	0	0	0	0	1	1	.	1	1	1	1	1	1	0	0	0	0	0	.
1	4656330	AAAAATAAA.CTGTGGATA_F	A	T	.	.	NS=12;AF=0.300	GT	.	.	.	.	.	.	.	0	.	.	0	.	.	.	.	1	1	1	1	1	1	1	1	1	.	.	.	.	0	.
1	2285066	AAAAATAAA.GCGGCAATG_F	C	T	.	.	NS=11;AF=0.067	GT	.	0	0	1	1	.	0	0	.	0	0	.	.	.	.	.	.	.	.	.	.	.	.	.	.	0	.	0	0	.
1	2201902	AAAAATAAA.TTGCACAAA_F	T	C	.	.	NS=9;AF=0.133	GT	.	.	.	1	1	.	.	0	.	0	0	.	.	.	.	.	.	.	.	.	.	.	.	.	.	1	0	1	0	.
1	2125067	AAAAATAAC.GCATTGTTC_F	T	A	.	.	NS=3;AF=0.033	GT	.	.	.	.	.	.	.	1	.	.	0	.	.	.	.	.	.	.	.	.	.	.	.	.	.	.	.	.	0	.
1	4642398	AAAAATAAC.GCCACCAGC_F	C	G	.	.	NS=3;AF=0.067	GT	.	.	.	.	.	1	.	.	.	.	0	.	.	.	.	.	.	.	.	.	.	.	.	.	.	.	.	.	.	1
1	302355	AAAAATAAC.GTTTGTTTA_R	A	G	.	.	NS=19;AF=0.033	GT	0	0	0	0	0	.	0	0	0	.	0	0	0	0	0	.	.	.	.	.	.	.	.	.	0	0	0	0	0	1
1	2397223	AAAAATAAC.TGCCATTGA_F	A	G	.	.	NS=8;AF=0.133	GT	.	.	.	.	.	.	1	0	.	.	0	.	1	1	1	.	.	.	.	.	.	.	.	.	0	.	.	.	0	.
1	2474344	AAAAATAAG.CCGATCAGC_R	T	A,G	.	.	NS=8;AF=0.033,0.033	GT	.	.	.	.	.	2	.	0	.	1	0	.	.	.	.	.	.	.	.	.	.	.	.	.	.	0	0	0	0	.
1	1765775	AAAAATAAG.CGCGCGGGT_F	C	G	.	.	NS=10;AF=0.033	GT	0	.	.	0	.	0	1	0	.	0	0	.	.	.	.	.	.	.	.	.	.	.	.	.	.	0	0	0	.	.
1	1841281	AAAAATAAG.GTCAAGACG_R	G	T	.	.	NS=18;AF=0.433	GT	.	0	0	.	.	.	1	0	.	.	0	.	.	.	.	1	1	1	1	1	1	1	1	1	.	1	1	1	0	.
1	1273373	AAAAATAAG.GTGATAACC_F	C	T	.	.	NS=12;AF=0.333	GT	.	.	.	.	1	.	.	0	.	.	0	.	.	.	.	1	1	1	1	1	1	1	1	1	.	.	.	.	.	.
1	3606889	AAAAATAAT.AAAAACGGT_R	A	T	.	.	NS=4;AF=0.033	GT	.	.	.	.	.	.	1	0	.	.	0	.	.	.	.	.	.	.	.	.	.	.	.	.	.	.	.	.	0	.
1	1176056	AAAAATAAT.CCAAAGATG_F	A	G	.	.	NS=4;AF=0.033	GT	.	.	.	.	.	.	.	0	.	.	0	.	.	.	.	.	.	.	.	.	.	.	.	.	.	.	.	.	0	1
1	1089121	AAAAATAAT.CGGGTTTGC_R	C	A	.	.	NS=6;AF=0.100	GT	.	.	.	.	.	.	.	0	.	.	0	.	.	.	.	.	.	.	.	.	.	.	.	.	.	1	1	1	0	.
1	1750889	AAAAATAAT.GGGCAAAGC_F	C	T	.	.	NS=12;AF=0.067	GT	0	1	1	.	.	.	0	0	.	.	0	0	0	0	0	.	.	.	.	.	.	.	.	.	0	.	.	.	0	.
1	4223066	AAAAATAAT.TGTTTGCGT_F	G	A	.	.	NS=14;AF=0.033	GT	.	.	.	.	.	.	0	0	1	.	0	.	.	.	.	0	0	0	0	0	0	0	0	0	.	.	.	.	0	.
1	3781820	AAAAATACA.AAATTACGA_F	G	A,C,T	.	.	NS=30;AF=0.033,0.033,0.133	GT	0	0	0	3	3	0	0	0	3	0	0	0	0	0	0	2	0	0	0	0	0	0	0	0	0	0	0	3	0	1
1	1608987	AAAAATACA.ATTTAGTTA_R	A	G	.	.	NS=22;AF=0.567	GT	0	.	0	1	1	.	1	0	.	1	0	1	1	1	1	1	1	.	.	.	1	1	1	1	.	1	1	1	0	.
1	2856336	AAAAATACA.CGCCTACTA_R	T	C	.	.	NS=5;AF=0.100	GT	.	.	.	1	1	.	.	.	.	1	0	.	.	.	.	.	.	.	.	.	.	.	.	.	.	.	.	.	0	.
1	2565242	AAAAATACC.AGCGCCAGC_R	G	C	.	.	NS=9;AF=0.100	GT	1	1	1	.	.	.	.	0	.	.	0	.	.	.	.	.	.	.	.	.	.	.	.	.	.	0	0	0	0	.
1	3109155	AAAAATACC.GTGCTGGTG_R	C	A	.	.	NS=19;AF=0.033	GT	0	0	0	0	0	0	0	0	.	0	0	0	1	0	0	.	.	.	.	.	.	.	.	.	0	0	0	0	0	.
1	1044106	AAAAATACC.TGACCAGTA_R	G	T	.	.	NS=7;AF=0.033	GT	.	.	.	.	.	.	.	0	.	.	0	.	.	.	.	.	.	.	.	.	.	.	.	.	.	0	0	0	0	1
1	1311976	AAAAATACG.CCGTTAGAG_F	G	C	.	.	NS=5;AF=0.033	GT	0	0	0	.	.	.	.	.	1	.	0	.	.	.	.	.	.	.	.	.	.	.	.	.	.	.	.	.	.	.
1	4099485	AAAAATACG.CCTTCCATC_F	C	T	.	.	NS=7;AF=0.033	GT	1	0	0	.	.	.	0	.	0	.	0	.	.	.	.	.	.	.	.	.	.	.	.	.	.	.	.	.	0	.
1	4534661	AAAAATACG.CGCAACAGG_F	C	A	.	.	NS=22;AF=0.033	GT	0	0	0	.	.	0	0	0	.	.	0	0	0	0	0	0	.	0	0	0	0	0	0	0	0	.	.	1	0	.
1	1787655	AAAAATACG.CGCAGCAGG_R	T	C,G	.	.	NS=13;AF=0.033,0.100	GT	0	0	0	2	2	1	0	0	.	2	0	.	.	.	.	.	.	.	.	.	.	.	.	.	.	0	0	.	0	.
1	3734952	AAAAATACG.TGCTGGTGA_F	C	T	.	.	NS=22;AF=0.067	GT	0	0	0	0	0	0	0	0	.	.	0	.	.	.	.	0	0	0	1	1	0	0	0	0	.	0	0	0	0	.
1	1655125	AAAAATACG.TTTGCTTAC_R	G	A,T	.	.	NS=18;AF=0.267,0.033	GT	0	0	0	1	1	.	1	0	.	2	0	1	1	1	1	.	.	.	.	.	.	.	.	.	1	0	0	0	0	.
1	2087984	AAAAATACT.CGGCTAACC_R	C	G	.	.	NS=5;AF=0.033	GT	.	.	.	.	.	.	.	.	.	.	0	.	.	.	.	.	.	.	.	.	.	.	.	.	.	1	0	0	0	.
1	1654979	AAAAATAGC.ACTATTTCC_R	C	G	.	.	NS=5;AF=0.100	GT	.	.	.	1	.	.	.	0	1	1	0	.	.	.	.	.	.	.	.	.	.	.	.	.	.	.	.	.	.	.
1	1399737	AAAAATAGC.ATAAAAATT_F	T	G	.	.	NS=10;AF=0.167	GT	.	.	.	.	.	.	.	0	0	0	0	1	1	1	1	.	.	.	.	.	.	.	.	.	1	.	.	.	0	.
1	1488160	AAAAATAGC.CCTGCCAGA_F	C	G	.	.	NS=5;AF=0.033	GT	0	.	.	.	.	.	.	0	.	.	0	.	.	.	.	.	.	.	.	.	.	.	.	1	.	.	.	.	0	.
1	4204984	AAAAATAGC.GTTCAACCC_F	G	A,T	.	.	NS=27;AF=0.400,0.067	GT	0	2	2	1	1	1	.	0	.	0	0	0	0	0	0	1	1	1	1	1	1	1	1	1	0	0	0	0	0	.
1	1801941	AAAAATAGC.TCACACGAC_R	A	G	.	.	NS=7;AF=0.133	GT	1	1	1	.	.	.	1	0	.	.	0	.	.	.	.	.	.	.	.	.	.	.	.	.	.	.	.	.	0	.
1	2086172	AAAAATAGC.TCAGGATGC_R	C	G,T	.	.	NS=5;AF=0.033,0.067	GT	.	.	.	.	.	.	.	0	.	.	0	.	.	.	.	.	.	.	.	.	.	.	.	.	.	2	1	2	.	.
1	1977829	AAAAATAGG.ATTTCCGAT_F	C	T	.	.	NS=25;AF=0.067	GT	0	0	0	0	0	.	0	0	1	0	0	0	0	0	0	0	1	0	0	0	0	0	0	0	0	.	.	.	0	.
1	729296	AAAAATAGG.GATTATGAT_R	T	G	.	.	NS=5;AF=0.100	GT	.	.	.	.	.	.	.	.	.	.	0	.	.	.	.	.	.	.	.	.	.	.	.	.	.	1	1	1	0	.
1	1985093	AAAAATAGG.GTATTCCCA_R	A	C,G	.	.	NS=27;AF=0.033,0.567	GT	0	0	0	2	2	.	.	0	1	2	0	2	2	2	2	2	2	2	2	2	2	2	2	2	2	0	0	0	0	.
1	61849	AAAAATAGT.CCGCGAATA_R	G	A	.	.	NS=12;AF=0.367	GT	1	.	.	1	1	.	.	.	.	1	0	1	1	1	1	.	.	.	.	.	.	.	.	.	1	.	1	1	.	.
1	1056835	AAAAATAGT.TTTTGGAAC_F	G	C	.	.	NS=3;AF=0.033	GT	.	.	.	.	.	.	.	0	.	.	0	.	.	.	.	.	.	.	.	.	.	.	.	.	.	.	.	.	1	.
1	1084721	AAAAATATA.ATCTGGATA_F	T	A,G	.	.	NS=28;AF=0.167,0.100	GT	0	0	0	2	2	0	0	0	0	2	0	1	1	1	1	0	0	0	0	0	0	0	0	0	1	0	.	0	0	.
1	1653747	AAAAATATA.CCCCAGCCT_F	G	A	.	.	NS=10;AF=0.033	GT	.	.	.	1	.	.	0	0	.	0	0	.	.	0	.	.	.	.	.	.	.	.	.	.	.	0	0	0	0	.
1	354930	AAAAATATC.ATTATTATT_R	C	T	.	.	NS=3;AF=0.033	GT	.	.	.	.	.	.	.	.	.	1	0	.	.	.	.	.	.	.	.	.	.	.	.	.	.	.	.	.	0	.
1	3441268	AAAAATATC.CCCAGCGCC_F	G	C	.	.	NS=2;AF=0.033	GT	.	.	.	.	.	.	.	.	1	.	0	.	.	.	.	.	.	.	.	.	.	.	.	.	.	.	.	.	.	.
1	479700	AAAAATATC.CCGCGTCCC_R	T	C,G	.	.	NS=10;AF=0.167,0.067	GT	.	.	.	.	.	.	2	0	.	2	0	1	1	1	1	.	.	.	.	.	.	.	.	.	1	.	.	.	0	.
1	3128221	AAAAATATC.GCGGGCCGG_F	G	T	.	.	NS=4;AF=0.033	GT	.	.	.	.	.	.	.	0	1	.	0	.	.	.	.	.	.	.	.	.	.	.	.	.	.	.	.	.	0	.
1	1436825	AAAAATATC.GTACCCAGA_F	C	G	.	.	NS=13;AF=0.067	GT	.	.	.	1	1	.	0	0	.	.	0	0	0	0	0	.	.	.	.	.	.	.	.	.	0	0	0	0	.	.
1	4315770	AAAAATATC.TCAGTACGC_F	A	G	.	.	NS=3;AF=0.033	GT	.	.	.	.	.	.	.	1	.	.	0	.	.	.	.	.	.	.	.	.	.	.	.	.	.	.	.	.	0	.
1	3885508	AAAAATATG.GAGATTAAT_R	A	C	.	.	NS=19;AF=0.033	GT	0	0	0	0	0	.	0	0	0	0	0	0	0	1	0	.	.	.	.	.	.	.	.	.	0	0	0	0	0	.
1	4222680	AAAAATATT.GCAAAGATA_R	A	G	.	.	NS=30;AF=0.033	GT	0	0	0	0	0	0	0	0	0	0	0	0	0	0	0	0	0	0	0	0	0	0	0	0	0	0	0	0	0	1
1	2654893	AAAAATATT.TTTTCTTAT_F	T	A	.	.	NS=28;AF=0.833	GT	1	1	1	1	1	.	1	0	1	1	0	1	1	1	1	1	1	1	1	1	1	1	1	1	1	1	1	1	0	.
1	1195627	AAAAATCAA.AAATGACAT_R	C	A	.	.	NS=3;AF=0.033	GT	.	.	.	.	.	.	.	.	.	1	0	.	.	.	.	.	.	.	.	.	.	.	.	.	.	.	.	.	0	.
1	142223	AAAAATCAA.ACGCCCAGC_R	A	G	.	.	NS=20;AF=0.033	GT	0	0	0	1	.	.	0	0	0	.	0	.	.	.	.	0	0	0	0	0	0	0	0	0	.	0	0	0	.	.
1	3690863	AAAAATCAA.CGCTCGGCC_R	T	C	.	.	NS=14;AF=0.033	GT	0	0	0	.	0	.	0	0	0	0	0	.	.	.	.	.	.	.	.	.	.	.	.	.	.	0	0	0	0	1
1	4156843	AAAAATCAA.GAGTTAACC_F	C	T	.	.	NS=29;AF=0.200	GT	0	0	0	0	0	.	0	0	0	0	0	1	1	1	1	0	0	0	0	0	0	0	0	0	1	0	0	0	0	1
1	4240715	AAAAATCAA.GGGCAGGCG_F	T	C	.	.	NS=4;AF=0.100	GT	.	.	.	.	.	.	.	.	.	.	0	.	.	.	.	.	.	.	.	.	.	.	.	.	.	1	1	1	.	.
1	655731	AAAAATCAC.AACCATCTG_F	G	A,T	.	.	NS=18;AF=0.100,0.033	GT	0	0	0	1	1	2	.	0	0	1	0	0	0	0	0	.	.	.	.	.	.	.	.	.	.	0	0	0	0	.
1	3006263	AAAAATCAC.ACGTCGCTC_R	G	A	.	.	NS=5;AF=0.033	GT	.	.	.	0	0	.	.	1	.	.	0	.	.	.	.	.	.	.	.	.	.	.	.	.	.	.	.	.	0	.
1	3312497	AAAAATCAC.CAAATGCTG_F	C	G	.	.	NS=4;AF=0.033	GT	.	.	.	.	.	1	.	0	.	.	0	.	.	.	.	.	.	.	.	.	.	.	.	.	.	.	.	.	0	.
1	4310043	AAAAATCAC.CATTCGTAT_R	G	C	.	.	NS=16;AF=0.300	GT	1	1	1	0	0	.	.	.	1	0	0	1	1	1	1	.	.	.	.	.	.	.	.	.	1	.	0	0	0	.
1	1219211	AAAAATCAC.CCGATTCTG_R	G	C	.	.	NS=11;AF=0.167	GT	.	0	0	.	.	.	0	0	.	.	0	1	1	1	1	.	.	.	.	.	.	.	.	.	1	.	.	.	0	.
1	1469640	AAAAATCAC.CTGAAAGAG_F	C	T	.	.	NS=14;AF=0.100	GT	.	0	0	1	0	.	.	.	0	0	0	1	1	.	.	.	.	.	.	.	.	.	.	.	.	0	0	0	0	0
1	167332	AAAAATCAC.CTGCAGCCA_R	A	G	.	.	NS=8;AF=0.200	GT	1	1	1	.	.	.	.	0	.	.	0	.	.	.	.	.	.	.	.	.	.	.	.	.	.	1	1	.	1	.
1	3368146	AAAAATCAC.GCGCCGAAC_F	T	C	.	.	NS=14;AF=0.367	GT	1	1	1	1	1	.	1	0	.	.	0	1	.	1	1	.	.	.	.	.	.	.	.	.	1	1	.	.	0	.
1	204866	AAAAATCAG.AAAAATGGA_R	A	G	.	.	NS=3;AF=0.033	GT	.	.	.	.	.	.	.	.	.	.	0	.	.	.	.	.	.	.	.	.	.	.	.	.	.	.	.	.	0	1
1	2920491	AAAAATCAG.AAGGTATCC_R	G	T	.	.	NS=5;AF=0.033	GT	.	.	.	.	.	.	.	0	.	.	0	.	.	.	.	.	.	.	.	.	.	.	.	.	.	1	0	0	.	.
1	483163	AAAAATCAG.ACCCCGAGG_R	A	G	.	.	NS=28;AF=0.833	GT	1	1	1	1	1	.	1	0	1	1	0	1	1	1	1	1	1	1	1	1	1	1	1	1	1	1	1	1	0	.
1	1585425	AAAAATCAG.ACTTCTTTA_R	T	G	.	.	NS=9;AF=0.100	GT	0	0	0	.	.	.	.	0	.	.	0	.	.	.	.	.	.	.	.	.	.	.	.	.	.	1	1	1	0	.
1	918125	AAAAATCAG.ATCAGGACA_R	T	C	.	.	NS=9;AF=0.233	GT	1	1	1	.	.	.	1	0	.	.	0	.	.	.	.	.	.	.	.	.	.	.	.	.	.	1	1	1	.	.
1	3122802	AAAAATCAG.ATGTGGTGG_R	T	C	.	.	NS=7;AF=0.133	GT	.	.	.	.	.	.	.	0	.	.	0	.	.	.	.	.	.	.	.	.	.	.	.	.	1	1	1	1	0	.
1	385527	AAAAATCAG.CCCAGCACA_R	G	T	.	.	NS=13;AF=0.267	GT	0	0	0	.	.	.	.	.	.	.	0	.	.	.	.	1	0	1	1	1	1	1	1	1	.	.	.	.	.	.
1	461696	AAAAATCAG.CCCCACATC_F	C	T	.	.	NS=23;AF=0.267	GT	0	0	0	.	.	0	0	0	.	.	0	0	0	0	0	1	1	1	0	0	.	.	1	1	0	1	1	1	0	.
1	2598676	AAAAATCAG.CCGCCGTAA_R	A	G	.	.	NS=13;AF=0.333	GT	.	.	.	.	.	.	.	0	.	.	0	.	.	.	.	1	1	1	1	1	1	1	1	1	.	.	.	.	0	1
1	3416834	AAAAATCAG.CGCGCCTCT_R	C	T	.	.	NS=3;AF=0.033	GT	.	.	.	.	.	.	.	1	.	.	0	.	.	.	.	.	.	.	.	.	.	.	.	.	.	.	.	.	0	.
1	4172592	AAAAATCAG.CGGATGTGA_R	C	A	.	.	NS=11;AF=0.067	GT	0	.	0	1	1	.	.	0	.	0	0	.	.	.	.	.	.	.	.	.	.	.	.	.	.	0	0	0	0	.
1	2117890	AAAAATCAG.GCCGTGAAA_R	C	T	.	.	NS=4;AF=0.033	GT	.	.	.	.	.	1	0	.	.	.	0	.	.	.	.	.	.	.	.	.	.	.	.	.	.	.	.	.	0	.
1	3429352	AAAAATCAG.GGAAAGGTG_F	T	A	.	.	NS=23;AF=0.333	GT	0	0	0	1	1	.	1	1	1	1	0	.	.	.	.	0	0	0	0	0	0	0	0	0	.	1	1	1	1	.
1	1331995	AAAAATCAG.GGCTGGTCA_R	C	T	.	.	NS=6;AF=0.033	GT	.	.	.	.	.	.	.	0	.	.	0	.	.	.	.	.	.	.	.	.	.	.	.	.	.	0	0	1	0	.
1	3991635	AAAAATCAG.TCGATATCG_F	G	A	.	.	NS=7;AF=0.067	GT	.	.	.	.	.	.	0	1	1	.	0	.	.	.	.	.	.	.	.	.	.	.	.	.	.	0	.	0	0	.
1	3697179	AAAAATCAG.TGGATAAAA_R	A	G	.	.	NS=3;AF=0.067	GT	.	.	.	.	.	.	.	1	.	.	0	.	.	.	.	.	.	.	.	.	.	.	.	.	.	.	.	.	1	.
1	667047	AAAAATCAT.ATTAAAATG_F	C	G	.	.	NS=5;AF=0.033	GT	.	.	.	.	0	.	.	0	.	.	0	.	.	.	.	.	.	.	.	.	.	.	.	.	.	.	.	1	0	.
1	3350575	AAAAATCAT.CCCTAGCAG_F	A	C	.	.	NS=4;AF=0.033	GT	.	.	.	.	.	.	.	.	.	.	0	.	.	.	.	.	.	.	.	.	.	.	.	.	.	.	.	0	0	1
1	817008	AAAAATCAT.CCGAGGATC_R	C	T	.	.	NS=27;AF=0.033	GT	0	0	0	0	0	.	0	.	1	0	0	0	0	0	0	0	0	0	0	0	0	0	0	0	.	0	0	0	0	0
1	2391291	AAAAATCAT.CTCATGATG_F	G	A	.	.	NS=27;AF=0.033	GT	1	0	0	0	0	.	0	0	.	0	0	0	0	0	0	0	0	0	0	0	0	0	0	0	0	0	0	0	0	.
1	3867698	AAAAATCAT.GCCTCCGTT_R	A	G	.	.	NS=6;AF=0.167	GT	.	.	.	.	.	.	.	1	1	.	0	.	.	.	.	.	.	.	.	.	.	.	.	.	.	1	1	1	.	.
1	307878	AAAAATCAT.GTCATGGTG_R	G	A	.	.	NS=28;AF=0.033	GT	0	0	0	0	0	.	1	0	0	0	0	0	0	0	0	0	0	0	0	0	0	0	0	0	0	0	0	0	0	.
1	1231669	AAAAATCCA.ACTCGGCGG_R	A	C	.	.	NS=7;AF=0.167	GT	.	.	.	.	.	.	.	.	.	.	0	1	1	1	1	.	.	.	.	.	.	.	.	.	1	.	.	.	0	.
1	2687884	AAAAATCCA.AGTTATTGC_R	A	G	.	.	NS=5;AF=0.100	GT	.	.	.	.	.	.	.	0	.	.	0	.	.	.	.	.	.	.	.	.	.	.	.	.	.	1	1	1	.	.
1	1160008	AAAAATCCA.ATTTAAAAA_R	C	A	.	.	NS=8;AF=0.033	GT	.	.	.	.	1	.	0	.	.	.	0	0	0	.	0	.	.	.	.	.	.	.	.	.	0	.	.	.	0	.
1	1510599	AAAAATCCA.GCCCTGACC_R	G	C	.	.	NS=4;AF=0.033	GT	.	.	.	.	.	.	1	0	.	.	0	.	.	.	.	.	.	.	.	.	.	.	.	.	.	.	.	.	0	.
1	642689	AAAAATCCC.GAAGGGATG_F	G	C	.	.	NS=25;AF=0.233	GT	0	.	.	0	0	.	0	0	0	0	0	1	1	1	0	0	0	1	0	0	1	1	1	0	.	0	0	0	0	.
1	3441562	AAAAATCCC.GGCCTTGCC_R	A	G	.	.	NS=2;AF=0.033	GT	1	.	.	.	.	.	.	.	.	.	0	.	.	.	.	.	.	.	.	.	.	.	.	.	.	.	.	.	.	.
1	3880983	AAAAATCCC.TCCGCGTCG_F	C	T	.	.	NS=30;AF=0.200	GT	0	0	0	0	0	0	1	0	0	1	0	0	0	0	0	0	0	0	0	0	0	0	0	0	0	1	1	1	0	1
1	2919642	AAAAATCCC.TCCGGATGC_F	A	G	.	.	NS=6;AF=0.100	GT	.	.	.	.	.	.	.	0	.	.	0	.	.	.	.	.	.	.	.	.	.	.	.	.	.	1	1	1	0	.
1	3644898	AAAAATCCG.ATCAAAACC_F	T	C	.	.	NS=14;AF=0.200	GT	.	.	.	1	1	.	.	0	.	1	0	0	0	0	0	.	.	.	.	.	.	.	.	.	0	1	1	1	0	.
1	1948220	AAAAATCCT.AATGGTGAA_R	G	A,C	.	.	NS=14;AF=0.033,0.133	GT	.	.	.	0	0	0	.	0	2	0	0	2	.	2	2	.	.	.	.	.	.	.	.	1	.	0	.	0	0	.
1	1099814	AAAAATCCT.AATTCACCG_F	G	A	.	.	NS=12;AF=0.033	GT	0	0	0	.	.	.	1	0	.	0	0	.	.	.	.	.	.	0	.	.	.	.	.	.	.	0	0	0	0	.
1	990307	AAAAATCCT.CGCTAATCT_R	G	C	.	.	NS=13;AF=0.033	GT	.	.	.	0	0	.	0	0	1	0	0	0	0	0	0	.	.	.	.	.	.	.	.	.	0	.	.	.	0	.
1	1321577	AAAAATCCT.GAAGTGCTT_R	G	A,C	.	.	NS=30;AF=0.467,0.133	GT	1	1	1	2	2	1	0	0	1	2	0	0	0	0	0	1	1	1	1	1	1	1	1	1	0	0	0	0	0	2
1	1595498	AAAAATCGA.CGCTATGAA_F	G	A	.	.	NS=9;AF=0.033	GT	0	0	0	.	.	.	0	0	.	.	0	.	.	.	.	.	.	.	.	.	.	.	.	.	.	.	0	1	0	.
1	1798304	AAAAATCGA.GATGTGCTC_F	C	T	.	.	NS=11;AF=0.067	GT	1	.	.	.	.	.	.	0	.	.	0	.	.	.	.	0	.	.	0	0	.	.	1	.	.	0	0	0	0	.
1	3733748	AAAAATCGA.GCGCTGCTG_R	T	C	.	.	NS=8;AF=0.033	GT	0	1	0	.	.	.	.	.	.	.	0	.	.	.	.	.	.	.	.	.	.	.	.	.	.	0	0	0	0	.
1	1757059	AAAAATCGC.ACCCTGGCG_R	A	C,G	.	.	NS=23;AF=0.033,0.200	GT	0	0	0	.	.	.	.	0	.	.	0	2	2	2	2	0	0	0	0	0	0	0	0	0	2	0	2	0	1	.
1	329300	AAAAATCGC.ACGTGGTTT_R	A	G	.	.	NS=12;AF=0.300	GT	.	.	.	.	.	.	.	0	.	.	0	.	.	.	.	1	1	1	1	1	1	1	1	1	.	.	.	.	0	.
1	1559837	AAAAATCGC.ATCGCCTGT_F	C	A	.	.	NS=29;AF=0.333	GT	0	0	0	0	0	1	0	0	0	0	0	0	0	0	0	1	1	1	1	1	1	1	1	1	0	0	0	0	0	.
1	3696748	AAAAATCGC.CCGGTTTAT_R	G	C	.	.	NS=15;AF=0.300	GT	.	.	.	.	.	.	.	0	.	.	0	.	.	.	.	1	1	1	1	1	1	1	1	1	.	0	0	0	0	.
1	406074	AAAAATCGC.CGCTAACCA_F	T	A	.	.	NS=16;AF=0.433	GT	.	.	.	1	1	1	.	0	.	1	0	.	.	.	.	1	1	1	1	1	1	1	1	1	.	.	.	.	0	.
1	3409775	AAAAATCGC.GGATTATAC_F	G	C	.	.	NS=30;AF=0.033	GT	0	0	0	0	0	0	0	0	0	0	0	0	0	0	0	0	0	0	0	0	0	0	0	0	0	0	0	0	0	1
1	2826213	AAAAATCGC.GTATCGCAC_R	C	G	.	.	NS=22;AF=0.100	GT	.	0	0	1	1	0	0	0	.	1	0	.	.	.	.	0	0	0	0	0	0	0	0	0	.	0	0	0	0	.
1	1565366	AAAAATCGC.TCTACCTGG_F	C	G	.	.	NS=6;AF=0.100	GT	.	.	.	1	1	.	.	0	.	1	0	.	.	.	.	.	.	.	.	.	.	.	.	.	.	.	.	.	0	.
1	1165594	AAAAATCGC.TGGAAAATG_F	G	C	.	.	NS=16;AF=0.067	GT	0	0	0	0	1	.	0	1	.	0	0	0	0	.	0	.	.	.	.	.	.	.	.	.	0	.	0	0	0	.
1	1670444	AAAAATCGG.AAATAGTCC_R	T	C	.	.	NS=4;AF=0.067	GT	.	.	.	.	.	.	.	1	1	.	0	.	.	.	.	.	.	.	.	.	.	.	.	.	.	.	.	.	0	.
1	2369774	AAAAATCGG.AAGCTCAGG_R	T	C	.	.	NS=12;AF=0.300	GT	1	1	1	.	.	.	1	0	.	.	0	1	1	1	1	.	.	.	.	.	.	.	.	.	1	.	.	.	0	.
1	4322704	AAAAATCGG.AGGTGATCC_R	G	T	.	.	NS=8;AF=0.033	GT	.	.	.	.	.	.	.	0	0	1	0	.	.	.	.	.	.	.	.	.	.	.	.	.	.	0	0	0	0	.
1	3170101	AAAAATCGG.CAGAAATGG_R	A	C,G	.	.	NS=9;AF=0.033,0.233	GT	2	2	2	.	.	.	2	.	1	.	0	.	.	.	.	.	.	.	.	.	.	.	.	.	.	2	2	2	.	.
1	3458376	AAAAATCGG.CAGATACGT_R	G	A	.	.	NS=29;AF=0.600	GT	0	0	0	1	1	0	0	0	1	1	0	1	1	1	1	1	1	1	1	1	1	1	1	1	1	0	0	0	0	.
1	3890211	AAAAATCGG.TCCTGGAGA_R	C	T	.	.	NS=26;AF=0.600	GT	0	.	0	1	1	.	0	0	1	1	0	1	1	1	1	1	1	1	1	1	1	1	1	1	1	0	0	.	0	.
1	4493481	AAAAATCGG.TCGCAGACG_F	T	C	.	.	NS=17;AF=0.433	GT	.	.	.	.	.	.	.	0	0	.	0	1	1	1	1	1	.	1	1	1	1	1	1	1	1	.	.	.	0	.
1	1777783	AAAAATCGT.ATGTACTGC_F	G	T	.	.	NS=12;AF=0.267	GT	.	.	.	1	1	0	.	0	.	1	0	1	1	1	1	.	.	0	.	.	.	.	.	.	1	.	.	.	.	.
1	2384676	AAAAATCGT.CTCAACGGT_F	G	A	.	.	NS=3;AF=0.033	GT	.	.	.	.	.	.	.	1	.	.	0	.	.	.	.	.	.	.	.	.	.	.	.	.	.	.	.	.	0	.
1	3213883	AAAAATCGT.GCCAGGCCA_F	T	C	.	.	NS=3;AF=0.033	GT	.	.	.	.	.	.	.	1	.	.	0	.	.	.	.	.	.	.	.	.	.	.	.	.	.	.	.	.	0	.
1	1941338	AAAAATCGT.TCCCAGGGG_R	G	C	.	.	NS=3;AF=0.033	GT	.	.	.	.	.	.	.	0	.	.	0	.	.	.	.	.	.	.	.	.	.	.	.	.	.	.	.	.	1	.
1	121797	AAAAATCTA.CTGCACGCC_R	A	G	.	.	NS=17;AF=0.133	GT	0	0	0	1	1	.	0	.	.	1	0	0	0	0	1	.	.	.	.	.	.	.	.	.	0	0	0	0	0	.
1	1995175	AAAAATCTA.GATGTCTGG_R	G	A	.	.	NS=5;AF=0.033	GT	.	0	0	.	.	.	.	0	.	.	0	.	.	.	.	.	.	.	.	.	.	.	.	.	.	.	.	.	1	.
1	2633133	AAAAATCTA.TTCAACTGG_R	G	A	.	.	NS=26;AF=0.033	GT	0	0	0	0	0	.	1	0	0	0	0	0	0	0	0	0	0	0	0	0	0	0	0	0	0	.	.	.	0	0
1	826592	AAAAATCTA.TTTCGCCAC_F	C	A,T	.	.	NS=21;AF=0.033,0.600	GT	2	2	2	.	.	.	2	0	2	.	0	.	.	.	.	2	2	2	2	2	2	2	2	2	.	2	2	2	1	2
1	4155437	AAAAATCTC.ATCAGACTG_F	G	T	.	.	NS=14;AF=0.267	GT	.	.	.	.	.	.	1	0	.	.	0	.	.	.	.	1	1	1	.	.	1	1	1	1	.	0	0	0	0	.
1	382750	AAAAATCTC.TCCACCATC_R	C	A,G	.	.	NS=24;AF=0.567,0.133	GT	1	1	1	.	.	.	1	0	1	1	0	2	2	.	2	1	1	1	1	1	1	1	1	1	2	.	1	1	0	.
1	933813	AAAAATCTC.TCGACGGTG_R	T	C	.	.	NS=7;AF=0.133	GT	1	1	1	.	.	.	1	0	.	.	0	.	.	.	.	.	.	.	.	.	.	.	.	.	.	.	.	.	0	.
1	3969702	AAAAATCTC.TCTACGGTC_R	G	C	.	.	NS=3;AF=0.033	GT	.	.	.	.	.	.	.	0	.	.	0	.	.	.	.	.	.	.	.	.	.	.	.	.	.	.	.	.	1	.
1	2338669	AAAAATCTG.AAACGCCCG_F	A	C	.	.	NS=2;AF=0.033	GT	.	.	.	.	.	.	.	.	.	.	0	.	.	.	.	.	.	.	.	.	.	.	.	.	.	.	.	.	1	.
1	1278164	AAAAATCTG.CAGTGAAAA_F	C	T	.	.	NS=17;AF=0.200	GT	1	1	1	1	1	.	.	0	.	1	0	0	0	0	0	.	.	.	.	.	.	.	.	.	0	0	0	0	0	.
1	3701378	AAAAATCTG.CCCTCTGCC_R	C	G	.	.	NS=5;AF=0.033	GT	0	.	.	.	.	.	1	0	.	.	0	.	.	.	.	.	.	.	.	.	.	.	.	.	.	.	.	.	0	.
1	2381714	AAAAATCTG.CGCAGCAGG_F	C	G	.	.	NS=4;AF=0.033	GT	.	.	.	.	.	.	0	0	.	.	0	.	.	.	.	.	.	.	.	.	.	.	.	.	.	.	1	.	.	.
1	382342	AAAAATCTG.TCGCTGTGC_R	G	A	.	.	NS=6;AF=0.033	GT	0	0	.	.	.	1	.	0	.	.	0	.	.	.	.	.	.	.	.	.	.	.	.	.	.	.	.	.	0	.
1	1572238	AAAAATCTT.ACCGAATAC_R	G	A	.	.	NS=29;AF=0.033	GT	0	0	0	0	0	0	0	0	0	0	0	0	0	1	0	0	0	0	0	0	0	0	0	0	0	0	0	0	0	.
1	2010010	AAAAATCTT.CTGGATTTA_R	G	C	.	.	NS=23;AF=0.033	GT	0	0	0	0	0	.	0	0	0	.	0	.	.	.	.	0	0	0	0	0	0	0	0	0	.	0	0	0	0	1
1	4473583	AAAAATCTT.CTTGAAGGA_R	G	A	.	.	NS=4;AF=0.033	GT	.	.	1	.	.	.	.	0	.	.	0	.	.	.	.	.	.	.	.	.	.	.	.	.	.	.	.	.	0	.
1	2472839	AAAAATCTT.GACCAGAAA_R	G	A	.	.	NS=22;AF=0.067	GT	0	1	1	.	.	.	.	.	0	.	0	0	0	0	0	0	0	0	0	0	0	0	0	0	0	0	0	0	.	.
1	2633562	AAAAATCTT.GCTAACCCG_R	G	A	.	.	NS=10;AF=0.067	GT	.	.	.	.	.	0	.	0	.	.	0	.	0	0	0	.	.	.	.	.	.	.	.	.	0	1	1	.	0	.
1	1044210	AAAAATCTT.GGCGACTGG_R	G	A	.	.	NS=21;AF=0.367	GT	0	0	0	1	1	.	0	0	.	.	0	.	.	.	.	1	1	1	1	1	1	1	1	1	.	0	0	0	0	.
1	1976278	AAAAATCTT.GTCTGGACG_F	C	T	.	.	NS=20;AF=0.033	GT	0	0	0	0	0	0	1	0	0	0	0	0	0	0	0	.	.	.	.	.	.	.	.	.	0	0	0	0	0	.
1	330674	AAAAATGAA.AACGGCTGG_F	C	T	.	.	NS=16;AF=0.400	GT	1	1	1	1	1	1	1	0	0	1	0	.	1	.	.	.	.	.	.	.	.	.	.	.	.	1	1	1	0	.
1	2475337	AAAAATGAA.AAGCTCATG_F	A	T	.	.	NS=3;AF=0.033	GT	.	.	.	.	.	.	.	1	.	.	0	.	.	.	.	.	.	.	.	.	.	.	.	.	.	.	.	.	0	.
1	678754	AAAAATGAA.CCCGTCTGT_F	G	T	.	.	NS=4;AF=0.033	GT	1	.	.	.	.	.	.	0	.	.	0	.	.	.	.	.	.	.	.	.	.	.	.	.	.	.	.	.	0	.
1	1761639	AAAAATGAA.GAGTTTTCC_F	T	C	.	.	NS=20;AF=0.200	GT	1	1	1	.	.	0	.	0	0	.	0	.	.	.	.	0	0	0	0	0	0	0	0	0	.	1	1	1	0	.
1	949667	AAAAATGAA.TATGCCAAC_F	A	G	.	.	NS=16;AF=0.033	GT	.	.	.	0	0	.	.	0	0	0	0	0	0	0	0	.	.	.	.	.	.	.	.	.	0	0	0	0	0	1
1	90394	AAAAATGAA.TCACGCAAA_F	G	A	.	.	NS=2;AF=0.033	GT	.	.	.	.	.	.	.	1	.	.	0	.	.	.	.	.	.	.	.	.	.	.	.	.	.	.	.	.	.	.
1	150651	AAAAATGAA.TCAGCCTGA_F	T	C	.	.	NS=13;AF=0.333	GT	1	1	1	1	1	.	.	.	0	1	0	1	1	.	1	.	.	.	.	.	.	.	.	.	1	.	.	.	0	.
1	4449734	AAAAATGAC.AAAACAACC_R	C	T	.	.	NS=4;AF=0.033	GT	.	.	.	.	.	.	.	0	.	1	0	.	.	.	.	.	.	.	.	.	.	.	.	.	.	.	.	.	0	.
1	3696601	AAAAATGAC.ATCACCAGA_R	A	G	.	.	NS=22;AF=0.067	GT	.	0	0	1	0	0	1	0	0	.	0	.	.	.	.	0	0	0	0	0	0	0	0	.	.	0	0	0	0	0
1	2692181	AAAAATGAC.CCCTGATAT_R	T	C	.	.	NS=2;AF=0.033	GT	.	.	.	.	.	.	.	1	.	.	0	.	.	.	.	.	.	.	.	.	.	.	.	.	.	.	.	.	.	.
1	2221482	AAAAATGAC.CCGCGCTGA_R	C	A	.	.	NS=6;AF=0.033	GT	.	.	.	.	.	1	.	.	.	.	0	.	.	.	.	.	.	.	.	.	.	.	.	.	.	0	0	0	0	.
1	3776887	AAAAATGAC.CCGTGGCTC_F	G	C	.	.	NS=9;AF=0.100	GT	.	.	.	0	0	.	.	0	.	0	0	.	.	.	.	.	.	.	.	.	.	.	.	.	.	1	1	1	0	.
1	6748	AAAAATGAC.GAGACAATG_F	A	C	.	.	NS=9;AF=0.100	GT	.	.	.	0	0	.	.	0	.	0	0	.	.	.	.	.	.	.	.	.	.	.	.	.	.	1	1	1	0	.
1	1097941	AAAAATGAC.GAGATACAG_R	G	T	.	.	NS=28;AF=0.033	GT	.	0	0	0	0	1	0	0	0	0	0	0	0	0	0	0	0	0	0	0	0	0	0	0	0	0	0	0	0	.
1	2321588	AAAAATGAC.GCATTGTCA_R	T	A	.	.	NS=4;AF=0.033	GT	.	.	1	.	.	.	.	0	.	.	0	.	.	.	.	.	.	.	.	.	.	.	.	.	.	.	.	.	0	.
1	3662795	AAAAATGAC.GGAGGGTTG_F	A	G	.	.	NS=13;AF=0.033	GT	0	0	0	.	.	.	1	0	0	.	0	0	0	0	0	.	.	.	.	.	.	.	.	.	0	.	.	.	0	.
1	914897	AAAAATGAC.TTGAGGATA_F	A	G	.	.	NS=3;AF=0.067	GT	.	.	.	.	.	.	.	1	.	.	0	.	.	.	.	.	.	.	.	.	.	.	.	.	.	.	.	.	1	.
1	2975209	AAAAATGAG.CAGTTCCAG_F	T	C	.	.	NS=3;AF=0.067	GT	.	.	.	.	.	.	.	1	.	.	0	.	.	.	.	.	.	.	.	.	.	.	.	.	.	.	.	.	1	.
1	3938506	AAAAATGAG.GCGCTGATA_R	C	T	.	.	NS=13;AF=0.033	GT	0	0	0	0	0	.	0	0	1	.	0	.	.	.	.	.	.	.	.	.	.	.	.	.	.	0	0	0	0	.
1	3518723	AAAAATGAT.AAGCCCGAT_F	A	G	.	.	NS=5;AF=0.033	GT	0	.	.	.	.	.	0	0	.	.	0	.	.	.	.	.	.	.	.	.	.	.	.	.	.	.	.	.	1	.
1	1006024	AAAAATGAT.AATGATGAA_F	G	C	.	.	NS=26;AF=0.033	GT	0	0	0	.	.	1	0	0	0	.	0	0	0	0	0	0	0	0	0	0	0	0	0	0	0	0	0	0	0	.
1	3155243	AAAAATGAT.GCCAATATC_F	A	G	.	.	NS=9;AF=0.167	GT	1	1	1	.	.	.	1	0	0	.	0	.	.	.	.	.	.	.	.	.	.	.	.	.	.	.	.	.	0	1
1	1386811	AAAAATGCA.CTTTTACCC_R	T	A	.	.	NS=27;AF=0.300	GT	0	0	0	0	0	.	0	0	.	0	0	0	0	0	0	1	1	1	1	1	1	1	1	1	0	0	0	0	0	.
1	3451897	AAAAATGCA.GAAAAACGC_R	A	G	.	.	NS=10;AF=0.267	GT	1	1	.	.	.	1	1	1	.	.	0	.	.	.	.	.	.	.	.	.	.	.	.	.	.	1	1	1	0	.
1	3762735	AAAAATGCC.ACTTCAGCC_F	T	C	.	.	NS=29;AF=0.300	GT	0	0	0	0	0	0	0	0	0	0	0	0	0	0	0	1	1	1	1	1	1	1	1	1	0	0	0	0	0	.
1	611690	AAAAATGCC.AGCACCACC_F	A	G	.	.	NS=19;AF=0.533	GT	1	.	.	1	1	.	1	0	.	.	0	.	.	.	.	1	1	1	1	1	1	1	1	1	.	1	1	1	0	.
1	83507	AAAAATGCC.ATCTGGTTC_R	T	G	.	.	NS=2;AF=0.033	GT	.	.	.	.	.	.	.	.	.	.	0	.	.	.	.	.	.	.	.	.	.	.	.	.	.	1	.	.	.	.
1	1344385	AAAAATGCC.GAAGGCCCG_F	A	T	.	.	NS=15;AF=0.300	GT	.	.	.	.	.	.	.	0	.	.	0	.	.	.	.	1	1	1	1	1	1	1	1	1	.	0	0	0	0	.
1	1022489	AAAAATGCC.GGTGGCGCT_F	G	C	.	.	NS=8;AF=0.300	GT	1	.	.	1	1	1	1	.	0	.	0	.	.	.	.	.	.	.	.	.	.	.	.	.	.	.	.	.	.	1
1	4547402	AAAAATGCC.GGTGGCGGC_F	G	C	.	.	NS=11;AF=0.033	GT	.	.	.	0	0	.	.	0	0	0	0	.	.	.	.	.	.	.	.	.	.	.	.	.	.	0	0	0	0	1
1	2912644	AAAAATGCC.TGTTGTAAA_R	A	G	.	.	NS=10;AF=0.233	GT	.	.	.	1	1	.	.	0	.	1	0	1	1	1	.	.	.	.	.	.	.	.	.	.	1	.	.	.	0	.
1	4627271	AAAAATGCC.TTAATTGTG_F	G	A	.	.	NS=14;AF=0.100	GT	.	.	.	0	0	.	.	1	.	.	0	.	.	.	.	0	0	0	1	1	0	0	0	0	.	.	.	.	0	.
1	1553100	AAAAATGCG.AACGTCTCC_F	T	C	.	.	NS=8;AF=0.033	GT	0	0	0	.	.	.	.	.	.	.	0	.	.	.	.	.	.	.	.	.	.	.	.	.	.	0	1	0	0	.
1	2052208	AAAAATGCG.ACCCTCGGT_F	C	T	.	.	NS=3;AF=0.033	GT	.	.	.	.	.	.	.	1	.	.	0	.	.	.	.	.	.	.	.	.	.	.	.	.	.	.	.	.	0	.
1	752583	AAAAATGCG.ACCTGGCTG_R	A	G	.	.	NS=26;AF=0.133	GT	1	1	1	0	0	1	0	0	.	0	0	0	0	0	0	0	0	0	0	0	0	0	0	0	.	.	0	.	0	0
1	699152	AAAAATGCG.CAGTTCCGC_F	T	C	.	.	NS=14;AF=0.133	GT	0	0	0	.	.	1	0	0	.	.	0	0	0	.	0	.	.	.	.	.	.	.	.	.	.	1	1	1	0	.
1	3495208	AAAAATGCG.GAAATCGCA_R	A	G	.	.	NS=21;AF=0.067	GT	.	.	.	0	0	.	0	0	0	0	0	0	0	0	0	0	0	0	.	.	0	0	0	.	0	1	.	1	0	.
1	3989664	AAAAATGCG.GCGCATCTG_R	G	A	.	.	NS=3;AF=0.033	GT	.	.	.	.	.	.	.	1	.	.	0	.	.	.	.	.	.	.	.	.	.	.	.	.	.	.	.	.	0	.
1	2264503	AAAAATGCG.TCGTCCAGG_R	A	G	.	.	NS=3;AF=0.033	GT	.	.	.	.	.	.	.	0	.	1	0	.	.	.	.	.	.	.	.	.	.	.	.	.	.	.	.	.	.	.
1	2208651	AAAAATGCT.AACGTCGCC_F	G	A	.	.	NS=10;AF=0.033	GT	0	0	0	.	.	.	.	0	1	.	0	.	.	.	.	.	.	.	.	.	.	.	.	.	.	0	0	0	0	.
1	380318	AAAAATGCT.AGCGAACAG_F	C	T	.	.	NS=5;AF=0.067	GT	.	.	.	1	1	.	.	0	.	.	0	.	.	.	.	.	.	.	.	.	.	.	.	.	.	.	.	.	0	.
1	179296	AAAAATGCT.CTGGCGCTG_R	A	C	.	.	NS=3;AF=0.033	GT	.	.	.	.	.	.	.	1	.	.	0	.	.	.	.	.	.	.	.	.	.	.	.	.	.	.	.	.	0	.
1	1843851	AAAAATGCT.GCCGCTGCG_R	G	A	.	.	NS=28;AF=0.300	GT	0	0	0	0	0	0	0	0	.	0	0	0	0	0	0	1	1	1	1	1	1	1	1	1	0	0	0	0	0	.
1	209689	AAAAATGGA.CCACGTTTA_R	C	T	.	.	NS=4;AF=0.033	GT	.	.	.	.	.	.	.	1	0	.	0	.	.	.	.	.	.	.	.	.	.	.	.	.	.	.	.	.	0	.
1	2318884	AAAAATGGA.TCTTCTGCC_R	T	C	.	.	NS=7;AF=0.100	GT	1	1	1	.	.	.	0	0	.	.	0	.	.	.	.	.	.	.	.	.	.	.	.	.	.	.	.	.	0	.
1	2774403	AAAAATGGA.TTCGACTTC_F	G	T	.	.	NS=23;AF=0.100	GT	1	1	1	0	0	.	.	0	.	0	0	0	0	0	0	0	0	0	.	.	0	0	.	0	0	0	0	0	0	.
1	3025443	AAAAATGGC.ACCACTTTC_R	G	C	.	.	NS=4;AF=0.033	GT	.	.	.	.	.	.	.	0	1	.	0	.	.	.	.	.	.	.	.	.	.	.	.	.	.	.	.	.	0	.
1	4704266	AAAAATGGC.ACGCACTTT_R	T	A	.	.	NS=28;AF=0.233	GT	1	1	1	0	0	.	1	0	0	0	0	0	0	0	0	0	0	0	0	0	0	0	0	0	0	1	1	1	0	.
1	3774961	AAAAATGGC.ACGTCCACA_F	A	G	.	.	NS=5;AF=0.100	GT	.	.	.	.	.	.	.	0	.	.	0	.	.	.	.	1	1	1	.	.	.	.	.	.	.	.	.	.	.	.
1	1290350	AAAAATGGC.ATGCAATCT_R	C	T	.	.	NS=30;AF=0.100	GT	1	1	1	0	0	0	0	0	0	0	0	0	0	0	0	0	0	0	0	0	0	0	0	0	0	0	0	0	0	0
1	4615706	AAAAATGGC.CAGGAACAG_R	T	A	.	.	NS=18;AF=0.033	GT	.	0	0	0	0	1	0	0	.	0	0	0	0	0	0	.	.	.	.	.	.	.	.	.	0	0	0	0	0	.
1	461366	AAAAATGGC.CCAGCGCTG_R	C	G	.	.	NS=4;AF=0.033	GT	.	.	.	.	.	.	1	0	.	.	0	.	.	.	.	.	.	.	.	.	.	.	.	.	.	.	.	.	0	.
1	2005603	AAAAATGGC.CGGGAACGC_R	G	A,C	.	.	NS=5;AF=0.033,0.033	GT	2	.	.	.	.	.	1	0	.	.	0	.	.	.	.	.	.	.	.	.	.	.	.	.	.	.	.	.	0	.
1	1591844	AAAAATGGC.GAACGCGGT_F	G	T	.	.	NS=6;AF=0.033	GT	.	.	.	.	1	.	.	0	.	.	0	.	.	.	.	.	.	.	.	.	.	.	.	.	.	0	.	0	0	.
1	2321262	AAAAATGGC.GCCCTGAAG_R	G	A	.	.	NS=8;AF=0.033	GT	.	.	0	.	.	.	.	0	.	1	0	0	.	0	0	.	.	.	.	.	.	.	.	.	.	.	.	.	0	.
1	1992942	AAAAATGGC.GCCGGGTAA_F	C	T	.	.	NS=9;AF=0.167	GT	.	.	.	.	.	.	.	0	.	.	0	.	.	.	.	1	0	1	1	1	.	.	.	1	.	.	.	.	0	.
1	3168263	AAAAATGGC.GGCATGGGA_F	T	A	.	.	NS=6;AF=0.100	GT	.	.	.	.	.	.	.	0	.	.	0	.	.	.	.	.	.	.	.	.	.	.	.	.	.	1	1	1	0	.
1	539692	AAAAATGGC.GTAGAAGCC_F	G	C	.	.	NS=4;AF=0.067	GT	.	1	.	1	.	.	.	0	.	.	0	.	.	.	.	.	.	.	.	.	.	.	.	.	.	.	.	.	.	.
1	2656845	AAAAATGGC.TAACGATTA_R	T	C	.	.	NS=27;AF=0.300	GT	0	0	0	0	0	.	0	0	0	.	0	0	0	0	0	1	1	1	1	1	1	1	1	1	0	0	0	0	0	.
1	666292	AAAAATGGC.TACGACACG_R	T	C	.	.	NS=6;AF=0.033	GT	.	0	0	.	.	.	.	1	0	.	0	.	.	.	.	.	.	.	.	.	.	.	.	.	.	.	.	.	0	.
1	1728400	AAAAATGGC.TTGTAGCAA_F	T	G	.	.	NS=6;AF=0.033	GT	.	.	.	.	.	.	.	1	.	.	0	.	.	.	.	.	.	.	.	.	.	.	.	.	.	0	0	0	0	.
1	3672951	AAAAATGGG.ATCCAGCTT_F	C	T	.	.	NS=17;AF=0.167	GT	0	.	0	0	0	.	0	0	1	0	0	1	.	1	1	.	.	.	.	.	.	.	.	.	1	0	0	0	0	.
1	3774739	AAAAATGGG.CCCTGCTGC_F	T	C,G	.	.	NS=22;AF=0.100,0.400	GT	0	0	1	2	2	.	0	0	0	2	0	1	.	1	.	2	2	2	2	2	2	2	2	2	.	.	.	.	0	.
1	4309883	AAAAATGGG.CTGGCAATG_F	A	G	.	.	NS=14;AF=0.367	GT	.	.	.	1	1	.	.	0	.	.	0	.	.	.	.	1	1	1	1	1	1	1	1	1	.	.	.	.	0	.
1	944682	AAAAATGGG.GAGACATAT_R	A	G	.	.	NS=11;AF=0.300	GT	.	.	.	.	.	.	.	.	.	.	0	.	.	.	.	1	1	1	1	1	1	1	1	1	.	.	.	.	0	.
1	2586991	AAAAATGGG.GAGATCGTC_R	C	A,T	.	.	NS=14;AF=0.333,0.033	GT	1	1	1	.	.	.	.	2	.	.	0	1	1	1	1	.	.	.	.	.	.	.	.	.	1	0	1	1	0	.
1	2077964	AAAAATGGG.GAGCCGTAT_F	T	C	.	.	NS=15;AF=0.300	GT	0	0	0	.	.	.	.	0	.	.	0	.	.	.	.	1	1	1	1	1	1	1	1	1	.	.	.	.	0	.
1	355594	AAAAATGGG.GAGCTGGGG_R	A	G	.	.	NS=8;AF=0.033	GT	.	.	.	.	.	0	1	0	.	.	0	0	.	.	0	.	.	.	.	.	.	.	.	.	0	.	.	.	0	.
1	97480	AAAAATGGT.AAAAACCCG_R	C	A	.	.	NS=17;AF=0.033	GT	0	0	0	.	.	1	0	.	0	.	0	0	0	0	0	.	.	.	.	.	.	.	.	.	0	0	0	0	0	0
1	871090	AAAAATGGT.AAAATCTCA_R	G	A	.	.	NS=9;AF=0.033	GT	0	0	0	.	.	.	.	0	.	.	0	.	.	.	.	.	.	.	.	.	.	.	.	.	.	0	0	0	1	.
1	1937418	AAAAATGGT.GGCTTCGTC_R	G	C	.	.	NS=4;AF=0.033	GT	.	.	.	.	.	.	.	0	1	.	0	.	.	.	.	.	.	.	.	.	.	.	.	.	.	.	.	.	0	.
1	2429279	AAAAATGGT.TCGGCGGCG_R	G	A	.	.	NS=3;AF=0.033	GT	.	.	.	.	.	.	.	1	.	.	0	.	.	.	.	.	.	.	.	.	.	.	.	.	.	.	.	.	0	.
1	3423011	AAAAATGGT.TTCTGTCTC_F	C	T	.	.	NS=2;AF=0.033	GT	.	.	.	.	.	.	.	1	.	.	0	.	.	.	.	.	.	.	.	.	.	.	.	.	.	.	.	.	.	.
1	1788249	AAAAATGGT.TTGATGATA_R	C	T	.	.	NS=3;AF=0.033	GT	.	0	.	.	.	.	.	.	1	.	0	.	.	.	.	.	.	.	.	.	.	.	.	.	.	.	.	.	.	.
1	4278570	AAAAATGTC.CCCCCGCAC_F	C	G	.	.	NS=2;AF=0.033	GT	.	.	.	.	.	.	.	.	.	.	0	.	.	.	.	.	.	.	.	.	.	.	.	.	.	.	.	.	1	.
1	3028082	AAAAATGTC.GCCCTGCCC_F	T	C	.	.	NS=6;AF=0.100	GT	.	.	.	.	.	.	.	0	.	.	0	.	.	.	.	.	.	.	.	.	.	.	.	.	.	1	1	1	0	.
1	3933047	AAAAATGTC.TCCACGCTC_F	C	T	.	.	NS=8;AF=0.067	GT	0	.	.	1	0	.	.	0	.	.	0	.	.	.	.	.	.	.	.	.	.	.	.	.	.	.	1	0	0	.
1	4172302	AAAAATGTT.GGCAGCATG_F	A	T	.	.	NS=8;AF=0.167	GT	.	.	.	.	.	.	.	0	.	.	0	1	1	1	1	.	.	.	.	.	.	.	.	.	1	.	.	.	0	.
1	2603621	AAAAATTAA.CCAGATCAA_R	A	G	.	.	NS=29;AF=0.633	GT	0	0	0	1	1	1	1	0	1	0	0	1	1	1	1	1	1	1	1	1	1	1	1	1	1	0	0	0	0	.
1	2039285	AAAAATTAA.CGCTGTGCG_R	G	A	.	.	NS=5;AF=0.033	GT	.	.	.	1	0	.	.	0	0	.	0	.	.	.	.	.	.	.	.	.	.	.	.	.	.	.	.	.	.	.
1	2481533	AAAAATTAA.GCCATCCAT_R	A	G	.	.	NS=12;AF=0.300	GT	.	.	.	.	.	.	.	0	.	.	0	.	.	.	.	1	1	1	1	1	1	1	1	1	.	.	.	.	0	.
1	3069020	AAAAATTAC.TACCCCTGG_R	G	C	.	.	NS=8;AF=0.033	GT	.	.	.	.	.	1	0	.	.	.	0	0	0	0	0	.	.	.	.	.	.	.	.	.	0	.	.	.	.	.
1	1811891	AAAAATTAC.TTTAACGCA_F	G	A,C	.	.	NS=10;AF=0.033,0.133	GT	0	.	0	2	2	.	.	0	.	2	0	.	.	.	.	.	.	.	.	.	.	.	.	.	.	1	.	2	0	.
1	3172389	AAAAATTAT.CTTTACTTA_R	C	G	.	.	NS=6;AF=0.033	GT	.	.	.	.	.	.	.	0	.	.	0	.	.	.	.	.	.	.	.	.	.	.	.	.	.	0	0	0	1	.
1	636379	AAAAATTAT.GATCAGATC_R	G	A	.	.	NS=18;AF=0.033	GT	.	0	0	.	.	.	0	0	.	.	0	.	.	.	.	0	0	0	0	0	0	0	0	1	.	0	0	0	0	.
1	2725021	AAAAATTAT.TCTCATTAA_F	A	C	.	.	NS=2;AF=0.033	GT	.	1	.	.	.	.	.	.	.	.	0	.	.	.	.	.	.	.	.	.	.	.	.	.	.	.	.	.	.	.
1	3330991	AAAAATTCA.GCTGTCGAG_F	T	C	.	.	NS=4;AF=0.033	GT	.	.	.	.	.	.	.	0	.	1	0	.	.	.	.	.	.	.	.	.	.	.	.	.	.	.	.	.	0	.
1	4100600	AAAAATTCA.GGAAGTGTT_R	T	C	.	.	NS=28;AF=0.100	GT	0	0	0	1	1	.	0	0	0	1	0	0	0	0	0	0	0	0	0	0	0	0	0	0	0	0	0	0	0	.
1	2571824	AAAAATTCA.GTAACCGAA_R	C	A,G	.	.	NS=17;AF=0.033,0.433	GT	.	.	.	.	.	2	.	0	2	.	0	.	.	.	.	1	2	2	2	2	2	2	2	2	.	2	2	2	0	.
1	3341194	AAAAATTCG.ATTCGTTAT_F	T	C	.	.	NS=11;AF=0.133	GT	1	1	1	.	.	.	1	0	0	.	0	.	.	.	.	.	.	.	.	.	.	.	.	.	.	0	0	0	0	.
1	3874471	AAAAATTCG.GTGATCCCT_F	G	C	.	.	NS=5;AF=0.033	GT	0	.	.	.	.	.	.	0	.	.	0	.	.	.	.	.	.	.	.	.	.	.	.	.	.	.	.	1	0	.
1	872606	AAAAATTCG.GTGCTGGTG_F	C	G	.	.	NS=4;AF=0.033	GT	.	.	.	.	.	.	.	0	1	.	0	.	.	.	.	.	.	.	.	.	.	.	.	.	.	.	.	.	0	.
1	1254494	AAAAATTCG.TAAATCAGA_F	C	A	.	.	NS=18;AF=0.500	GT	1	1	1	1	1	.	1	0	.	1	0	1	1	1	1	.	.	.	.	.	.	.	.	.	1	1	1	1	0	.
1	3733571	AAAAATTCT.GAAGACGAA_R	A	G	.	.	NS=3;AF=0.033	GT	.	.	.	.	.	.	.	1	.	.	0	.	.	.	.	.	.	.	.	.	.	.	.	.	.	.	.	.	0	.
1	3510828	AAAAATTCT.GAGGTACAA_R	T	A	.	.	NS=27;AF=0.833	GT	.	1	1	1	1	1	1	1	.	1	0	1	1	1	1	1	1	1	1	1	1	1	1	1	1	1	1	1	0	.
1	1857757	AAAAATTCT.TATGTGCAG_F	T	C,G	.	.	NS=4;AF=0.067,0.033	GT	.	.	.	.	.	.	.	1	2	.	0	.	.	.	.	.	.	.	.	.	.	.	.	.	.	.	.	.	1	.
1	1081179	AAAAATTGA.GAAGGACTC_R	C	T	.	.	NS=29;AF=0.033	GT	0	0	0	0	0	0	.	0	0	0	0	0	0	0	0	0	0	0	0	0	0	0	0	0	0	0	0	0	0	1
1	3158019	AAAAATTGA.GCCCTGCAG_F	T	C	.	.	NS=12;AF=0.233	GT	1	0	.	1	1	.	1	0	.	.	0	0	.	.	.	.	.	.	.	.	.	.	.	.	.	1	1	1	0	.
1	1204718	AAAAATTGA.GCCGGTGAA_R	T	C	.	.	NS=4;AF=0.033	GT	.	.	.	.	.	.	.	0	.	.	0	.	.	.	.	.	.	.	.	.	.	.	.	.	.	.	1	.	0	.
1	4482624	AAAAATTGA.GCGCTGAAG_R	G	C	.	.	NS=10;AF=0.033	GT	0	0	0	.	.	.	1	0	.	.	0	.	.	.	.	.	.	.	.	.	.	.	.	.	.	0	0	0	0	.
1	1316470	AAAAATTGC.AACGCCATG_F	C	T	.	.	NS=5;AF=0.067	GT	.	.	.	.	.	.	.	0	.	.	0	.	1	.	.	.	.	.	.	.	.	.	.	.	1	.	.	.	0	.
1	4085071	AAAAATTGC.AAGCGCGAG_F	T	C,G	.	.	NS=28;AF=0.067,0.033	GT	0	1	1	0	0	.	2	0	0	0	0	0	0	0	0	0	0	0	0	0	0	0	0	0	0	0	0	0	0	.
1	964515	AAAAATTGC.ACCTGCGTG_R	C	G	.	.	NS=9;AF=0.233	GT	.	.	.	.	.	.	.	0	.	.	0	1	1	.	1	.	.	.	.	.	.	.	.	.	1	1	1	1	.	.
1	3791580	AAAAATTGC.CAGCCAGGG_R	T	C	.	.	NS=2;AF=0.033	GT	.	.	.	.	.	.	.	1	.	.	0	.	.	.	.	.	.	.	.	.	.	.	.	.	.	.	.	.	.	.
1	3511407	AAAAATTGG.CTTAACGCC_F	G	C	.	.	NS=8;AF=0.133	GT	.	.	.	.	.	.	1	0	0	.	0	.	.	.	.	.	.	.	.	.	.	.	.	.	.	1	1	1	0	.
1	4535824	AAAAATTGG.GCCGGACTG_R	G	A	.	.	NS=6;AF=0.100	GT	.	.	.	1	1	.	.	0	.	1	0	.	.	.	.	.	.	.	.	.	.	.	.	.	.	.	.	.	0	.
1	2584956	AAAAATTGG.TTCCGTCGC_R	C	G	.	.	NS=8;AF=0.167	GT	.	.	.	.	.	.	.	0	.	.	0	1	1	1	1	.	.	.	.	.	.	.	.	.	1	.	.	.	0	.
1	1676086	AAAAATTGT.ATGTCGGCC_R	C	A	.	.	NS=2;AF=0.033	GT	.	.	.	.	.	.	.	1	.	.	0	.	.	.	.	.	.	.	.	.	.	.	.	.	.	.	.	.	.	.
1	441660	AAAAATTGT.CTGCAGGTT_R	C	A,G	.	.	NS=13;AF=0.233,0.033	GT	2	0	0	.	.	.	.	0	.	.	0	1	1	1	1	.	.	.	.	.	.	.	.	.	1	.	1	1	0	.
1	2437797	AAAAATTGT.GAGCAGGGC_R	G	C	.	.	NS=2;AF=0.033	GT	.	.	.	.	.	.	.	.	.	1	0	.	.	.	.	.	.	.	.	.	.	.	.	.	.	.	.	.	.	.
1	2433917	AAAAATTGT.GCGCTGATG_F	C	G,T	.	.	NS=9;AF=0.200,0.033	GT	1	1	1	.	.	.	.	0	.	.	0	.	.	.	.	.	.	.	.	.	.	.	.	.	.	1	1	1	2	.
1	2765833	AAAAATTTA.GGCGTGAAG_R	A	G	.	.	NS=17;AF=0.500	GT	1	1	1	1	1	.	1	.	.	1	0	1	1	1	1	.	.	.	.	.	.	.	.	.	1	1	1	1	0	.
1	545253	AAAAATTTA.TCACACCAT_R	T	A	.	.	NS=2;AF=0.033	GT	.	.	.	.	.	.	.	.	1	.	0	.	.	.	.	.	.	.	.	.	.	.	.	.	.	.	.	.	.	.
1	2837245	AAAAATTTC.AACTCCACC_F	A	G	.	.	NS=29;AF=0.133	GT	0	0	1	0	0	0	0	0	0	0	0	0	0	0	0	0	0	0	0	0	0	0	0	0	0	1	1	1	0	.
1	2016225	AAAAATTTC.CGCAGTGCC_R	C	A	.	.	NS=10;AF=0.033	GT	0	0	0	.	.	.	1	0	.	.	0	.	.	.	.	.	.	.	.	.	.	.	.	.	.	0	0	0	0	.
1	2869609	AAAAATTTC.CTCTCTTTC_F	G	A	.	.	NS=24;AF=0.033	GT	.	.	.	0	0	.	.	0	1	0	0	0	0	0	0	0	0	0	0	0	0	0	0	0	0	0	0	0	0	.
1	4170380	AAAAATTTC.GGCGATTCA_R	T	A	.	.	NS=9;AF=0.200	GT	.	.	.	.	.	.	.	0	.	.	0	.	.	.	.	1	.	1	.	.	1	1	1	1	.	.	.	.	0	.
1	1282435	AAAAATTTG.GGCTTGTCT_F	C	T	.	.	NS=16;AF=0.233	GT	0	1	1	.	.	.	0	0	0	.	0	1	1	1	1	.	.	.	.	.	.	.	.	.	1	0	0	0	0	.
1	1180417	AAAAATTTT.ATGATTGTG_R	G	A	.	.	NS=4;AF=0.033	GT	.	.	.	.	.	.	.	0	0	.	0	.	.	.	.	.	.	.	.	.	.	.	.	.	.	.	.	.	1	.
1	1488756	AAAAATTTT.GTTACGCGC_R	A	G	.	.	NS=17;AF=0.300	GT	.	.	.	.	.	.	.	0	.	.	0	0	0	0	0	1	1	1	1	1	1	1	1	1	0	.	.	.	0	.
1	615654	AAAAATTTT.TCTTTCAGG_F	C	G	.	.	NS=15;AF=0.033	GT	0	0	0	0	0	.	0	0	0	.	0	0	0	0	0	.	.	.	.	.	.	.	.	.	.	.	.	.	0	1
1	3501507	AAAACAAAA.ATTAACACA_F	A	C,T	.	.	NS=11;AF=0.133,0.167	GT	.	.	.	2	2	.	.	.	.	.	0	1	.	1	1	.	.	.	.	.	.	.	.	.	1	2	2	2	0	.
1	3672416	AAAACAAAA.CCCAGAGGA_F	A	G	.	.	NS=3;AF=0.067	GT	.	.	.	.	.	.	.	1	.	.	0	.	.	.	.	.	.	.	.	.	.	.	.	.	.	.	.	.	1	.
1	1843882	AAAACAAAA.CTCAGGGGA_R	A	G	.	.	NS=29;AF=0.033	GT	0	0	0	0	0	0	0	0	0	1	0	0	0	0	0	0	0	0	0	0	0	0	0	0	0	0	0	0	0	.
1	2030103	AAAACAAAA.GGGCGTGGT_R	C	T	.	.	NS=24;AF=0.167	GT	0	0	0	.	.	.	.	0	0	.	0	1	1	1	1	0	0	0	0	0	0	0	0	0	1	0	0	0	0	.
1	96600	AAAACAAAC.GCGAAAAGG_R	G	A,T	.	.	NS=30;AF=0.067,0.033	GT	0	1	1	0	0	0	0	0	0	0	0	0	0	0	0	0	0	0	0	0	0	0	0	0	0	0	0	0	0	2
1	4171057	AAAACAAAC.GTTGAGATC_F	C	T	.	.	NS=25;AF=0.033	GT	0	0	0	0	0	.	0	0	1	0	0	0	0	0	0	0	0	0	0	0	0	0	0	0	0	.	.	.	0	.
1	1022692	AAAACAAAG.CAACCTTGT_F	A	G	.	.	NS=26;AF=0.033	GT	0	.	.	0	0	.	0	1	0	0	0	0	0	0	0	0	0	0	0	0	0	0	0	0	0	0	0	0	0	.
1	4608792	AAAACAAAG.CAGCAAAAG_F	C	T	.	.	NS=4;AF=0.067	GT	.	1	1	.	.	.	.	0	.	.	0	.	.	.	.	.	.	.	.	.	.	.	.	.	.	.	.	.	.	.
1	4255950	AAAACAAAG.CCCGTCGAG_R	T	C	.	.	NS=7;AF=0.033	GT	.	0	0	.	.	.	0	0	.	1	0	.	.	.	.	.	.	.	.	.	.	.	.	.	.	.	.	.	0	.
1	4668346	AAAACAAAG.CTAAACCGA_F	G	T	.	.	NS=3;AF=0.033	GT	.	.	.	.	.	.	.	1	.	.	0	.	.	.	.	.	.	.	.	.	.	.	.	.	.	.	.	.	0	.
1	1144927	AAAACAACA.CATCACCGC_R	G	C	.	.	NS=14;AF=0.033	GT	0	0	0	.	.	1	0	0	0	.	0	.	.	.	.	0	.	.	0	0	.	.	.	0	.	.	.	.	0	0
1	112665	AAAACAACA.CATGCCGTC_R	T	C	.	.	NS=2;AF=0.033	GT	.	.	.	.	.	.	.	.	.	.	0	.	.	.	.	.	.	.	.	.	.	.	.	.	.	.	.	.	1	.
1	1863311	AAAACAACC.TCATTATGC_R	C	G	.	.	NS=13;AF=0.300	GT	.	.	.	.	.	.	0	0	.	.	0	.	.	.	.	1	1	1	1	1	1	1	1	1	.	.	.	.	0	.
1	3167706	AAAACAACG.TGCTCTTCG_R	C	T	.	.	NS=27;AF=0.300	GT	0	.	.	0	0	0	0	0	0	0	0	0	0	0	0	1	1	1	1	1	1	1	1	1	0	0	0	0	0	.
1	4646890	AAAACAACT.AATTAAACG_R	A	T	.	.	NS=16;AF=0.100	GT	.	.	.	1	1	.	0	0	0	1	0	0	0	0	0	.	.	.	.	.	.	.	.	.	0	0	0	0	0	.
1	4093247	AAAACAACT.TTTACCCTA_R	C	T	.	.	NS=10;AF=0.033	GT	.	.	.	.	.	.	0	.	.	1	0	0	.	0	0	.	.	.	.	.	.	.	.	.	0	0	0	0	.	.
1	16364	AAAACAAGA.ACCGAGACC_F	G	A	.	.	NS=15;AF=0.300	GT	0	0	0	.	.	.	.	0	.	.	0	.	.	.	.	1	1	1	1	1	1	1	1	1	.	.	.	.	0	.
1	3112282	AAAACAATA.AAAACAGAG_F	C	T	.	.	NS=3;AF=0.067	GT	.	.	.	.	.	.	.	.	1	.	0	.	.	.	.	.	.	.	.	.	.	.	.	.	.	1	.	.	.	.
1	1829353	AAAACAATA.CCTTATCAT_R	T	C	.	.	NS=17;AF=0.033	GT	0	0	0	0	0	.	.	0	1	0	0	0	0	0	0	.	.	.	.	.	.	.	.	.	0	0	0	0	.	.
1	2571896	AAAACAATA.GTTCACTTC_F	A	C	.	.	NS=12;AF=0.167	GT	.	.	.	.	.	.	.	0	0	.	0	1	1	1	1	.	.	.	.	.	.	.	.	.	1	0	0	0	0	.
1	3922822	AAAACAATC.CAGAAAAGT_F	G	T	.	.	NS=20;AF=0.300	GT	0	0	.	0	0	.	.	0	.	0	0	.	.	.	.	1	1	1	1	1	1	1	1	1	.	0	0	0	0	.
1	4373861	AAAACAATC.CTGCGACGT_F	T	G	.	.	NS=19;AF=0.033	GT	0	1	0	0	0	0	0	0	.	0	0	0	0	0	0	.	.	.	.	.	.	.	.	.	0	0	0	0	0	.
1	785080	AAAACAATC.GCACTGTGG_R	G	A	.	.	NS=17;AF=0.333	GT	1	1	1	0	0	.	.	0	0	0	0	1	1	1	1	.	.	.	.	.	.	.	.	.	.	1	1	1	0	.
1	311650	AAAACAATG.TCTACTTAC_F	A	C	.	.	NS=14;AF=0.033	GT	0	0	0	1	0	0	0	0	0	0	0	.	.	.	.	.	.	.	.	.	.	.	.	.	.	0	.	0	0	.
1	1192345	AAAACAATT.ATTTGACCA_F	C	A	.	.	NS=4;AF=0.100	GT	1	1	1	.	.	.	.	.	.	.	0	.	.	.	.	.	.	.	.	.	.	.	.	.	.	.	.	.	.	.
1	185223	AAAACACAA.CCCCCGCAA_F	G	A	.	.	NS=16;AF=0.033	GT	.	.	.	.	.	1	.	0	.	.	0	.	.	.	.	0	0	0	0	0	0	0	0	0	.	0	0	0	0	.
1	4168671	AAAACACAA.GGCCGCTGG_F	T	C	.	.	NS=7;AF=0.100	GT	.	.	.	.	.	.	.	0	0	.	0	.	.	.	.	.	.	.	.	.	.	.	.	.	.	1	1	1	0	.
1	3779065	AAAACACAG.GAAGCCGAA_R	A	G	.	.	NS=12;AF=0.300	GT	.	.	.	.	.	.	.	0	.	.	0	.	.	.	.	1	1	1	1	1	1	1	1	1	.	.	.	.	0	.
1	829635	AAAACACAT.TTCAGCGAC_R	G	A	.	.	NS=18;AF=0.333	GT	1	0	0	.	.	.	0	0	.	.	0	.	.	.	.	1	1	1	1	1	1	1	1	1	.	0	0	.	0	.
1	1979558	AAAACACCA.ATCGACCAT_F	A	G	.	.	NS=7;AF=0.100	GT	0	.	.	.	.	.	.	0	.	.	0	.	.	.	.	.	.	.	.	.	.	.	.	.	.	1	1	1	0	.
1	1843942	AAAACACCA.CAGAATGGT_F	G	A	.	.	NS=15;AF=0.167	GT	0	0	0	.	.	.	.	0	.	0	0	1	1	1	1	.	.	.	.	.	.	.	.	.	1	0	0	0	0	.
1	2375796	AAAACACCA.CGGGATTAC_R	A	G	.	.	NS=10;AF=0.133	GT	1	0	0	.	0	.	.	0	.	.	0	.	.	.	.	.	.	.	.	.	.	.	.	.	.	1	1	1	0	.
1	3662652	AAAACACCC.CTTTGCGGC_R	A	C	.	.	NS=12;AF=0.033	GT	0	0	0	0	0	.	1	0	0	0	0	.	.	.	.	.	.	.	.	.	.	.	.	.	.	0	.	.	0	.
1	2441765	AAAACACCC.GAACATGCG_R	A	C	.	.	NS=8;AF=0.167	GT	.	.	.	.	.	.	.	0	.	.	0	1	1	1	1	.	.	.	.	.	.	.	.	.	1	.	.	.	0	.
1	1460068	AAAACACCC.GACCAGTAT_R	A	C	.	.	NS=6;AF=0.100	GT	.	.	.	.	.	.	.	0	.	.	0	.	.	.	.	.	.	.	.	.	1	1	.	.	.	.	.	.	0	1
1	3317786	AAAACACCG.ATCGTTGAG_R	A	G	.	.	NS=9;AF=0.233	GT	1	1	1	.	.	.	1	.	.	.	0	.	.	.	.	.	.	.	.	.	.	.	.	.	.	1	1	1	0	.
1	3291264	AAAACACCG.ATTGACTTA_F	G	A	.	.	NS=5;AF=0.067	GT	.	.	.	.	.	.	1	0	.	0	0	.	.	.	.	.	.	.	.	.	.	.	.	.	.	.	.	.	1	.
1	589545	AAAACACCG.CGACGGTAC_R	T	G	.	.	NS=6;AF=0.033	GT	.	.	.	0	0	.	.	0	.	0	0	.	.	.	.	.	.	.	.	.	.	.	.	.	.	.	.	.	1	.
1	2216332	AAAACACCG.CGCTTCCAC_F	C	T	.	.	NS=10;AF=0.233	GT	.	.	.	.	.	.	.	0	.	.	0	1	1	1	1	.	.	.	.	.	.	.	.	.	1	.	1	1	0	.
1	1109588	AAAACACCG.GCCATGCCG_F	G	T	.	.	NS=17;AF=0.267	GT	0	0	0	0	0	.	.	0	0	.	0	1	1	1	1	.	.	.	.	.	.	.	.	.	1	1	1	1	0	.
1	1604254	AAAACACCG.TGATGAGCA_F	C	A	.	.	NS=12;AF=0.300	GT	1	.	.	.	.	.	.	0	.	.	0	1	1	1	1	.	.	.	.	.	.	.	.	.	1	1	1	1	0	.
1	2643329	AAAACACCT.GCCGAAATG_R	C	G	.	.	NS=7;AF=0.033	GT	.	0	0	.	.	.	1	0	0	.	0	.	.	.	.	.	.	.	.	.	.	.	.	.	.	.	.	.	0	.
1	2030683	AAAACACCT.GCGCGCGCA_F	G	C	.	.	NS=6;AF=0.167	GT	.	1	1	.	.	.	.	.	.	.	0	.	.	.	.	.	.	.	.	.	.	.	.	.	.	1	1	1	.	.
1	4523022	AAAACACGA.TAACAGCGG_F	A	G	.	.	NS=9;AF=0.100	GT	0	0	0	.	.	.	.	.	0	.	0	.	.	.	.	.	.	.	.	.	.	.	.	.	.	1	1	1	0	.
1	3699226	AAAACACGA.TTTGCGCGT_R	G	A	.	.	NS=3;AF=0.067	GT	.	.	.	.	.	.	.	1	.	.	0	.	.	.	.	.	.	.	.	.	.	.	.	.	.	.	.	.	1	.
1	3274808	AAAACACGC.AAAGGCTAT_F	C	G	.	.	NS=8;AF=0.033	GT	.	.	0	.	.	.	.	0	1	0	0	.	.	.	.	.	.	.	.	.	.	.	.	.	.	0	.	.	0	0
1	1228079	AAAACACGC.ATTTACAGT_R	T	A	.	.	NS=2;AF=0.033	GT	.	.	.	.	.	.	.	1	.	.	0	.	.	.	.	.	.	.	.	.	.	.	.	.	.	.	.	.	.	.
1	94585	AAAACACGC.GAAGGCTCC_F	T	A	.	.	NS=24;AF=0.300	GT	0	0	0	0	0	0	0	0	0	0	0	.	.	.	.	1	1	1	1	1	1	1	1	1	.	0	0	0	0	.
1	704996	AAAACACGC.GAGCGGTAT_R	G	T	.	.	NS=5;AF=0.067	GT	.	.	.	1	1	.	.	0	.	.	0	.	.	.	.	.	.	.	.	.	.	.	.	.	.	.	.	.	0	.
1	1164964	AAAACACGC.GGCGAACTC_F	C	G	.	.	NS=8;AF=0.200	GT	1	1	.	.	.	.	.	0	.	.	0	.	.	.	.	.	.	.	.	.	.	.	.	.	.	1	1	1	1	.
1	3092950	AAAACACGC.GGGCCTGGC_F	C	T	.	.	NS=4;AF=0.033	GT	.	.	.	1	.	.	.	0	.	.	0	.	.	.	.	.	.	.	.	.	.	.	.	.	.	.	.	.	0	.
1	2301649	AAAACACGC.TGACTTCGC_F	A	G	.	.	NS=14;AF=0.033	GT	.	1	0	0	0	.	.	0	0	0	0	0	0	0	0	.	.	.	.	.	.	.	.	.	0	.	.	.	0	.
1	3803636	AAAACACGG.AACCGTGAA_F	T	C	.	.	NS=4;AF=0.033	GT	1	.	.	.	.	.	.	0	.	.	0	.	.	.	.	.	.	.	.	.	.	.	.	.	.	.	.	.	0	.
1	3736625	AAAACACGG.ATTCCGGAC_R	G	A	.	.	NS=28;AF=0.533	GT	1	1	1	1	1	.	0	0	1	1	0	0	0	0	0	1	1	1	1	1	1	1	1	1	0	0	0	0	0	.
1	2843923	AAAACACGG.GCTGACCGC_R	T	A	.	.	NS=3;AF=0.033	GT	.	.	.	.	.	.	.	.	1	.	0	.	.	.	.	.	.	.	.	.	.	.	.	.	.	.	.	.	0	.
1	2035818	AAAACACGG.GTCACGCTG_R	G	A	.	.	NS=21;AF=0.033	GT	0	0	0	0	0	.	0	.	.	0	0	.	.	.	.	0	1	0	0	0	0	0	0	0	.	0	0	0	0	.
1	642641	AAAACACGG.TTCCGCCGG_F	T	C	.	.	NS=8;AF=0.100	GT	.	0	0	.	.	.	.	0	1	1	0	.	.	.	.	.	.	.	.	.	.	.	.	.	.	.	.	.	0	1
1	3847187	AAAACACGT.ATTACCGTC_R	A	C,G	.	.	NS=19;AF=0.033,0.433	GT	2	2	2	.	.	2	1	0	.	.	0	.	.	.	.	2	2	2	2	2	2	2	2	2	.	.	0	0	0	.
1	2831665	AAAACACTA.GGCCTGACC_R	G	A	.	.	NS=5;AF=0.033	GT	.	.	.	0	1	.	.	0	.	0	0	.	.	.	.	.	.	.	.	.	.	.	.	.	.	.	.	.	.	.
1	1648749	AAAACACTA.GTCTGTGCT_F	A	G	.	.	NS=3;AF=0.067	GT	.	1	1	.	.	.	.	.	.	.	0	.	.	.	.	.	.	.	.	.	.	.	.	.	.	.	.	.	.	.
1	2800202	AAAACACTC.CTATGAGGT_R	A	C	.	.	NS=28;AF=0.133	GT	0	0	0	0	0	.	0	0	1	0	0	0	0	0	0	0	0	0	0	0	0	0	0	0	0	1	1	1	0	.
1	3067571	AAAACACTC.CTGCTCAAG_R	A	G	.	.	NS=24;AF=0.700	GT	.	1	1	1	1	.	1	0	1	1	0	1	1	1	1	1	1	1	1	1	1	1	.	1	1	.	1	.	0	.
1	1382605	AAAACACTC.GCCACTTTG_R	A	G	.	.	NS=8;AF=0.200	GT	.	.	1	1	.	.	.	0	.	1	0	1	.	1	.	.	.	.	.	.	.	.	.	.	.	.	.	.	1	.
1	4310554	AAAACACTC.GGATGCTAC_F	A	T	.	.	NS=29;AF=0.033	GT	0	0	0	0	0	0	1	0	0	0	0	0	0	0	0	0	0	0	0	0	0	0	0	0	0	0	0	0	0	.
1	3946512	AAAACACTG.CGCAAATTT_F	G	A	.	.	NS=9;AF=0.133	GT	1	0	0	.	.	.	.	0	.	.	0	.	.	.	.	.	.	.	.	.	.	.	.	.	.	1	1	1	0	.
1	1429255	AAAACACTT.GATCTGGCA_R	A	G	.	.	NS=5;AF=0.033	GT	.	.	.	.	.	.	.	1	.	.	0	0	.	.	0	.	.	.	.	.	.	.	.	.	0	.	.	.	.	.
1	1098594	AAAACAGAA.ATGATTGCC_R	C	T	.	.	NS=9;AF=0.100	GT	1	.	1	.	.	.	1	0	.	.	0	.	.	.	.	.	.	.	.	.	.	.	.	.	.	0	0	0	0	.
1	4406332	AAAACAGAA.CAGCATCTC_R	T	C	.	.	NS=4;AF=0.033	GT	.	.	.	.	.	.	1	0	.	.	0	.	.	.	.	.	.	.	.	.	.	.	.	.	.	.	.	.	0	.
1	4608158	AAAACAGAA.CAGCATGGC_F	G	C	.	.	NS=26;AF=0.033	GT	0	0	0	.	.	.	0	0	1	0	0	0	0	0	0	0	0	0	0	0	0	0	0	0	0	0	0	0	0	.
1	2195604	AAAACAGAA.CCGCAGGCA_F	T	C	.	.	NS=2;AF=0.033	GT	.	.	1	.	.	.	.	.	.	.	0	.	.	.	.	.	.	.	.	.	.	.	.	.	.	.	.	.	.	.
1	545038	AAAACAGAA.TATTAAAAA_R	T	G	.	.	NS=2;AF=0.033	GT	.	.	.	.	.	.	1	.	.	.	0	.	.	.	.	.	.	.	.	.	.	.	.	.	.	.	.	.	.	.
1	4656568	AAAACAGAC.AAGTAATGG_R	T	C	.	.	NS=4;AF=0.033	GT	.	.	.	.	.	.	.	0	1	.	0	.	.	.	.	.	.	.	.	.	.	.	.	.	.	.	.	.	0	.
1	2754446	AAAACAGAC.ATAAACATC_F	G	A	.	.	NS=3;AF=0.033	GT	.	.	.	.	.	.	.	0	.	.	0	.	.	.	.	.	.	.	.	.	.	.	.	.	.	.	.	.	1	.
1	1647106	AAAACAGAC.ATAAGGCGA_F	A	T	.	.	NS=28;AF=0.100	GT	1	1	1	0	0	.	0	0	0	0	0	0	0	0	0	0	0	0	0	0	0	0	0	0	0	0	0	0	0	.
1	4507223	AAAACAGAC.ATTCGGGAG_F	G	A	.	.	NS=21;AF=0.400	GT	.	.	.	.	.	0	1	0	.	.	0	0	0	0	0	1	.	1	1	1	1	1	1	1	0	1	1	1	0	.
1	1932971	AAAACAGAC.CATGCGGGC_R	T	C	.	.	NS=4;AF=0.033	GT	.	.	.	.	.	.	.	0	1	.	0	.	.	.	.	.	.	.	.	.	.	.	.	.	.	.	.	.	0	.
1	2566904	AAAACAGAC.CTGGCGATC_F	C	G,T	.	.	NS=19;AF=0.367,0.033	GT	0	0	0	1	1	1	0	0	2	1	0	.	.	.	.	1	1	1	.	.	1	1	1	1	.	.	.	.	0	.
1	3184059	AAAACAGAG.GAAGCGCTG_R	A	G	.	.	NS=29;AF=0.167	GT	1	1	1	0	0	1	1	0	0	0	0	0	0	0	0	0	0	0	0	0	0	0	0	0	0	0	0	0	0	.
1	1544688	AAAACAGAG.GCTATGCAA_F	A	C	.	.	NS=17;AF=0.167	GT	0	0	0	0	0	.	.	0	0	0	0	1	1	1	1	.	.	.	.	.	.	.	.	.	1	0	0	0	.	.
1	2694285	AAAACAGAG.GTGAGGCTG_R	C	T	.	.	NS=5;AF=0.133	GT	.	.	.	.	.	.	.	1	.	.	0	.	.	.	.	1	.	1	.	.	.	.	.	.	.	.	.	.	1	.
1	2922873	AAAACAGAG.TTAACAATC_F	A	G	.	.	NS=21;AF=0.100	GT	0	0	0	1	1	.	.	0	.	1	0	.	.	.	.	0	0	0	0	0	0	0	0	0	.	0	0	0	0	.
1	3224609	AAAACAGAT.AAATTCTTG_R	G	T	.	.	NS=27;AF=0.033	GT	0	0	0	0	0	0	0	0	.	0	0	0	0	0	1	0	0	0	0	0	0	0	0	0	0	0	.	0	0	.
1	49982	AAAACAGAT.AACGAAACA_F	A	T	.	.	NS=9;AF=0.267	GT	.	.	.	.	.	.	.	.	.	.	0	.	.	.	.	1	1	.	1	1	1	1	1	1	.	.	.	.	.	.
1	1216815	AAAACAGAT.CCAATCAGC_F	A	G	.	.	NS=6;AF=0.133	GT	.	.	.	.	.	.	.	0	.	.	0	1	1	1	1	.	.	.	.	.	.	.	.	.	.	.	.	.	.	.
1	1795686	AAAACAGAT.GCCATTAAC_F	C	T	.	.	NS=11;AF=0.033	GT	.	.	.	.	0	.	0	0	.	0	0	0	0	0	0	.	.	.	.	.	.	.	.	.	0	.	.	.	1	.
1	3438231	AAAACAGAT.GCCGCGCTG_R	A	G	.	.	NS=17;AF=0.033	GT	.	0	0	.	.	.	.	0	1	0	0	.	.	.	.	0	0	0	0	0	0	0	0	.	.	0	0	.	0	.
1	3354756	AAAACAGAT.TCGCTATTG_R	C	T	.	.	NS=24;AF=0.267	GT	0	.	.	0	0	.	.	0	0	0	0	0	0	0	0	1	.	1	1	1	1	1	1	1	0	0	0	0	0	.
1	487466	AAAACAGCA.AATCGCATA_F	G	A,C	.	.	NS=10;AF=0.033,0.033	GT	.	.	.	1	.	.	2	.	0	.	0	0	0	0	.	.	.	.	.	.	.	.	.	.	0	.	0	.	0	.
1	2880674	AAAACAGCA.AATGGCATA_R	G	T	.	.	NS=10;AF=0.233	GT	.	.	.	.	.	.	.	.	.	.	0	.	.	.	.	1	1	1	1	1	1	1	0	0	.	.	.	.	.	.
1	4627158	AAAACAGCA.CACCGTTGC_R	T	C	.	.	NS=9;AF=0.067	GT	.	.	.	.	.	.	1	.	.	.	0	0	0	0	0	.	.	.	.	.	.	.	.	.	0	.	.	.	0	1
1	4469110	AAAACAGCA.CAGGCGATT_R	A	G	.	.	NS=10;AF=0.233	GT	1	1	1	1	1	.	1	0	.	1	0	.	.	.	.	.	.	.	.	.	.	.	.	.	.	.	.	.	0	.
1	2745234	AAAACAGCA.CCGCCAGAA_F	T	C	.	.	NS=13;AF=0.333	GT	1	1	1	.	.	.	.	0	.	.	0	.	.	.	.	1	1	1	1	1	.	.	1	1	.	.	.	.	0	.
1	2999582	AAAACAGCA.CGCCATTCC_F	G	A,C	.	.	NS=8;AF=0.100,0.033	GT	.	.	.	.	1	.	1	0	.	.	0	1	.	.	2	.	.	.	.	.	.	.	.	.	.	.	0	.	0	.
1	2882719	AAAACAGCA.CGCGGTGAT_R	G	C	.	.	NS=17;AF=0.500	GT	.	.	.	1	.	.	.	0	.	.	0	1	1	1	1	1	1	1	1	1	1	1	1	1	1	.	.	.	.	.
1	2772959	AAAACAGCA.CTTGAGGCG_R	A	G	.	.	NS=16;AF=0.167	GT	0	0	0	.	.	.	0	0	0	.	0	1	1	1	1	.	.	.	.	.	.	.	.	.	1	0	0	0	0	.
1	171266	AAAACAGCA.GATGACGAT_F	T	C	.	.	NS=20;AF=0.300	GT	.	0	0	1	1	.	.	.	.	.	0	0	0	0	0	1	1	1	1	1	0	0	1	1	0	.	.	.	0	.
1	2470169	AAAACAGCA.GCCTGGCAG_R	C	T	.	.	NS=10;AF=0.167	GT	.	0	0	.	.	.	.	0	.	.	0	1	1	1	1	.	.	.	.	.	.	.	.	.	1	.	.	.	0	.
1	1776018	AAAACAGCA.GCGGCCCTG_F	G	T	.	.	NS=4;AF=0.033	GT	.	.	.	.	.	.	.	0	.	1	0	.	.	.	.	.	.	.	.	.	.	.	.	.	.	.	.	.	0	.
1	47070	AAAACAGCC.AATTGTGTG_R	T	C	.	.	NS=3;AF=0.033	GT	.	.	.	.	.	.	.	1	.	.	0	.	.	.	.	.	.	.	.	.	.	.	.	.	.	.	.	.	0	.
1	2744796	AAAACAGCC.ACCACCTGC_F	A	C,G	.	.	NS=11;AF=0.167,0.133	GT	2	2	2	.	.	.	2	.	.	.	0	1	1	1	1	.	.	.	.	.	.	.	.	.	1	.	.	.	0	.
1	2601656	AAAACAGCC.CCGAACATG_R	G	C	.	.	NS=9;AF=0.233	GT	.	.	.	.	.	.	.	0	.	.	0	.	.	.	.	1	1	1	.	.	1	1	1	1	.	.	.	.	.	.
1	723480	AAAACAGCC.CGTCTGTGG_R	C	G	.	.	NS=6;AF=0.033	GT	.	.	.	.	.	.	.	0	.	.	0	.	.	.	.	.	.	.	.	.	0	0	.	.	.	.	.	.	0	1
1	2878075	AAAACAGCC.GAAGAACCC_R	G	C	.	.	NS=10;AF=0.100	GT	.	.	.	1	1	.	.	.	.	1	0	0	0	0	0	.	.	.	.	.	.	.	.	.	0	.	.	.	0	.
1	719019	AAAACAGCC.GCGTTTATG_R	T	A	.	.	NS=20;AF=0.567	GT	.	.	.	.	1	1	.	0	.	1	0	.	1	1	.	1	1	1	1	1	1	1	1	1	.	1	1	1	0	.
1	2341201	AAAACAGCC.GGATCCGGC_F	A	G	.	.	NS=10;AF=0.033	GT	0	0	0	0	0	.	.	.	.	1	0	.	.	.	.	.	.	.	.	.	.	.	.	.	.	0	0	0	.	.
1	1918268	AAAACAGCC.GGTATTAAT_F	G	A	.	.	NS=12;AF=0.300	GT	.	.	.	.	.	.	.	0	0	.	0	.	.	.	.	1	1	1	1	1	1	1	1	1	.	.	.	.	.	.
1	4030247	AAAACAGCC.GTCGAACTG_R	A	C	.	.	NS=3;AF=0.067	GT	.	.	.	.	.	.	.	.	.	.	0	.	.	.	.	.	.	1	.	.	.	.	.	.	1	.	.	.	.	.
1	3069500	AAAACAGCC.TACGATTTG_R	A	T	.	.	NS=16;AF=0.167	GT	0	.	.	0	0	.	0	0	.	0	0	1	1	1	1	.	.	.	.	.	.	.	.	.	1	0	0	0	0	.
1	3314252	AAAACAGCC.TCAAAAATC_F	A	G	.	.	NS=13;AF=0.100	GT	.	.	.	.	.	.	.	1	1	.	0	.	.	.	.	0	0	0	0	0	0	0	0	0	.	.	.	.	1	.
1	3116775	AAAACAGCC.TCCTTGTCT_F	A	G	.	.	NS=8;AF=0.033	GT	.	.	.	.	.	.	.	0	0	1	0	0	.	0	.	.	.	.	.	.	.	.	.	.	0	.	.	.	0	.
1	1109325	AAAACAGCC.TGCTTCTGG_R	A	G	.	.	NS=19;AF=0.300	GT	.	.	.	.	.	0	.	0	0	.	0	0	0	0	0	1	1	1	1	1	1	1	1	1	0	.	.	.	0	.
1	1500302	AAAACAGCC.TGGGATGCG_F	A	G,T	.	.	NS=14;AF=0.400,0.033	GT	1	1	2	1	1	.	1	1	.	1	0	1	1	1	1	.	.	.	.	.	.	.	.	.	1	.	.	.	.	.
1	803258	AAAACAGCC.TTTCGACTC_F	G	T	.	.	NS=22;AF=0.033	GT	0	0	0	.	.	.	0	0	0	0	0	.	.	.	.	0	0	0	0	0	0	0	0	0	.	0	0	0	0	1
1	982246	AAAACAGCC.TTTGTGGTG_F	G	A	.	.	NS=21;AF=0.300	GT	.	0	0	0	0	.	0	.	.	0	0	0	0	.	0	1	1	1	1	1	1	1	1	1	0	.	.	.	0	.
1	1577801	AAAACAGCG.AATTAACCG_R	G	A	.	.	NS=7;AF=0.100	GT	.	.	.	.	.	.	.	0	.	.	0	.	.	.	.	1	.	1	.	.	.	.	.	1	.	.	.	0	0	.
1	944613	AAAACAGCG.CAGGGCGAT_R	A	G	.	.	NS=20;AF=0.033	GT	0	.	0	.	.	.	0	0	0	1	0	.	.	.	.	0	0	0	0	0	0	0	0	0	.	0	0	0	0	.
1	3507150	AAAACAGCG.CTGCCGCTG_F	C	G	.	.	NS=15;AF=0.033	GT	.	.	.	0	0	.	1	0	.	0	0	.	.	.	.	0	0	0	0	0	0	0	0	.	.	.	.	.	0	.
1	2009472	AAAACAGCG.GCCTACCTG_R	G	A	.	.	NS=13;AF=0.133	GT	1	1	1	0	0	.	0	0	.	0	0	.	.	.	.	.	.	.	.	.	.	.	.	.	.	0	0	1	0	.
1	3972588	AAAACAGCG.GGCGGCACC_F	T	C	.	.	NS=7;AF=0.133	GT	1	1	1	.	.	.	.	0	1	.	0	.	.	.	.	.	.	.	.	.	.	.	.	.	.	.	.	.	0	.
1	1053761	AAAACAGCG.TGCGGGCAT_R	C	G	.	.	NS=27;AF=0.100	GT	0	0	0	1	1	0	0	.	.	1	0	0	0	0	0	0	0	0	0	0	0	0	0	0	0	0	0	0	0	.
1	3634643	AAAACAGCT.AACGGCGGG_F	A	G	.	.	NS=28;AF=0.167	GT	.	0	0	0	0	0	.	0	0	0	0	1	1	1	1	0	0	0	0	0	0	0	0	0	1	0	0	0	0	0
1	2178142	AAAACAGCT.ATCTGGCAG_F	T	G	.	.	NS=8;AF=0.100	GT	.	0	0	.	.	.	.	0	1	1	0	.	.	.	.	.	.	.	.	.	.	.	1	.	.	.	.	.	0	.
1	828306	AAAACAGCT.CGTCGCGGG_R	C	T	.	.	NS=14;AF=0.033	GT	0	0	1	.	.	.	0	0	0	0	0	0	.	.	0	.	.	.	.	.	.	.	.	.	.	0	0	0	0	.
1	1337519	AAAACAGCT.CTGCCGATG_R	G	A	.	.	NS=24;AF=0.300	GT	0	0	0	.	.	.	.	0	0	.	0	0	0	0	0	1	1	1	1	1	1	1	1	1	0	0	0	0	0	.
1	708670	AAAACAGCT.CTGCCGCAG_R	A	G	.	.	NS=5;AF=0.067	GT	.	.	.	1	1	.	.	0	.	.	0	.	.	.	.	.	.	.	.	.	.	.	.	.	.	.	.	.	0	.
1	1078088	AAAACAGCT.CTGGCGCTG_F	T	C	.	.	NS=7;AF=0.100	GT	.	.	.	.	.	.	.	0	0	.	0	.	.	.	.	.	.	.	.	.	.	.	.	.	.	1	1	1	0	.
1	4679193	AAAACAGCT.GCCAGATCG_R	C	G	.	.	NS=19;AF=0.033	GT	.	.	.	0	0	1	.	0	.	0	0	.	.	.	.	0	0	0	0	0	0	0	0	0	.	0	0	0	0	.
1	2699597	AAAACAGCT.GCCGTGCAG_R	C	A	.	.	NS=9;AF=0.033	GT	.	.	.	0	0	.	.	0	.	1	0	.	.	.	.	.	.	.	.	.	.	.	.	.	.	0	0	0	0	.
1	4169780	AAAACAGCT.GGCCTGCCG_F	G	T	.	.	NS=25;AF=0.033	GT	.	.	.	0	0	.	1	0	0	0	0	0	0	0	0	0	0	0	0	0	0	0	0	0	0	0	0	0	0	.
1	1177798	AAAACAGCT.GGGGCATTT_F	G	C	.	.	NS=13;AF=0.133	GT	0	0	0	0	0	1	.	0	.	0	0	.	.	.	.	.	.	.	.	.	.	.	.	.	.	1	1	1	0	.
1	2033153	AAAACAGCT.GGTATGTCC_R	C	T	.	.	NS=22;AF=0.033	GT	0	1	0	.	.	.	0	0	0	.	0	0	0	0	0	0	0	0	0	0	0	0	0	0	0	.	.	.	0	.
1	3198883	AAAACAGCT.TATGAAGTG_F	C	T	.	.	NS=19;AF=0.033	GT	.	.	.	0	0	1	0	0	.	.	0	.	.	.	.	0	0	0	0	0	0	0	0	.	.	0	0	0	0	0
1	3719007	AAAACAGCT.TATGACGAG_F	G	T	.	.	NS=11;AF=0.133	GT	0	1	1	0	0	.	1	0	1	0	0	.	.	.	.	.	.	.	.	.	.	.	.	.	.	.	.	.	0	.
1	2526833	AAAACAGCT.TCCGGCACG_F	T	C	.	.	NS=9;AF=0.067	GT	0	0	0	0	.	1	.	0	.	0	0	.	.	.	.	.	.	.	.	.	.	.	.	.	.	.	.	.	0	.
1	685568	AAAACAGCT.TGCTGCCTA_R	A	T	.	.	NS=2;AF=0.033	GT	.	.	.	.	.	.	1	.	.	.	0	.	.	.	.	.	.	.	.	.	.	.	.	.	.	.	.	.	.	.
1	3277218	AAAACAGGA.AAAAGCAAA_R	G	A	.	.	NS=12;AF=0.300	GT	.	.	.	.	.	.	.	0	.	.	0	.	.	.	.	1	1	1	1	1	1	1	1	1	.	.	.	.	0	.
1	629678	AAAACAGGA.AGCAGAGGT_F	A	C	.	.	NS=28;AF=0.033	GT	0	0	0	0	0	0	0	0	0	0	0	0	0	0	0	0	0	0	0	0	0	0	.	0	.	0	0	0	0	1
1	1267440	AAAACAGGA.CAGGTAAAT_F	G	A	.	.	NS=3;AF=0.033	GT	.	.	.	.	.	.	.	1	.	.	0	.	.	.	.	.	.	.	.	.	.	.	.	.	.	.	.	.	0	.
1	2534501	AAAACAGGA.CTGGTCAGA_R	C	T	.	.	NS=23;AF=0.100	GT	.	.	.	1	1	.	.	0	.	1	0	0	0	0	0	0	0	0	0	0	0	0	0	0	0	0	0	0	0	.
1	399682	AAAACAGGC.AGATAGCCA_F	C	G	.	.	NS=15;AF=0.167	GT	.	.	.	.	.	.	.	0	.	.	0	1	1	1	1	0	.	0	0	0	0	0	.	0	1	.	.	.	0	.
1	1321153	AAAACAGGC.CAAAAAAAA_F	C	A	.	.	NS=2;AF=0.033	GT	.	.	.	.	.	.	.	.	.	.	0	.	.	.	.	.	.	.	.	.	.	1	.	.	.	.	.	.	.	.
1	488322	AAAACAGGC.GAGACATTC_R	T	C	.	.	NS=26;AF=0.767	GT	1	1	1	.	.	1	1	0	1	.	0	1	1	1	1	1	1	1	1	1	1	1	1	1	1	1	1	1	0	.
1	4206540	AAAACAGGC.GGTGTGCCT_R	T	G	.	.	NS=2;AF=0.033	GT	.	.	.	.	.	.	.	1	.	.	0	.	.	.	.	.	.	.	.	.	.	.	.	.	.	.	.	.	.	.
1	29665	AAAACAGGC.TTCAGCAGC_F	G	A	.	.	NS=9;AF=0.067	GT	0	.	.	1	0	.	0	0	.	0	0	.	.	.	.	.	.	.	.	.	.	.	.	.	.	1	.	.	0	.
1	4172629	AAAACAGGG.GCAGAGGTG_R	A	G,T	.	.	NS=8;AF=0.100,0.033	GT	.	.	.	.	.	.	.	2	.	.	0	0	1	0	1	.	.	.	.	.	.	.	.	.	1	.	.	.	0	.
1	2155210	AAAACAGGG.GTGAAATAC_R	C	A	.	.	NS=4;AF=0.033	GT	.	.	.	.	.	.	.	0	1	.	0	.	.	.	.	.	.	.	.	.	.	.	.	.	.	.	.	.	0	.
1	1387869	AAAACAGGG.GTGCCGATG_F	T	A,C	.	.	NS=12;AF=0.133,0.167	GT	2	2	2	.	.	.	.	0	.	.	0	1	1	1	.	.	.	.	.	.	.	.	.	.	1	.	2	2	0	.
1	2637788	AAAACAGGG.GTTCGTTAA_F	T	C	.	.	NS=2;AF=0.033	GT	.	.	.	.	.	.	.	.	.	.	0	.	.	.	.	.	.	.	.	.	.	.	.	.	.	.	.	.	1	.
1	1749522	AAAACAGGG.TAATGGCAG_F	T	G	.	.	NS=17;AF=0.433	GT	1	1	1	.	.	.	0	0	1	.	0	.	.	.	.	1	1	1	1	1	1	1	1	1	.	.	.	.	0	.
1	2497658	AAAACAGGG.TTTTACGCC_F	G	T	.	.	NS=10;AF=0.067	GT	.	.	.	0	0	.	.	0	.	.	0	.	.	1	1	.	.	.	.	.	.	.	.	.	.	0	0	0	0	.
1	4446969	AAAACAGGT.AAAGTGCCG_F	G	A	.	.	NS=15;AF=0.367	GT	.	.	.	1	1	0	.	0	.	.	0	.	.	.	.	1	1	1	1	1	1	1	1	1	.	.	.	.	0	.
1	1447485	AAAACAGGT.ATCCATACC_F	A	T	.	.	NS=12;AF=0.300	GT	1	1	1	1	1	.	1	0	.	.	0	.	.	.	.	.	.	.	.	.	.	.	.	.	.	1	1	1	0	.
1	2054960	AAAACAGGT.CAGTATGCC_R	C	A	.	.	NS=6;AF=0.033	GT	1	.	.	.	.	.	.	0	0	.	0	.	.	.	.	.	.	.	.	.	.	.	.	.	.	0	.	.	0	.
1	449789	AAAACAGGT.CCGCTTGGC_F	C	T	.	.	NS=14;AF=0.167	GT	.	.	.	0	0	.	0	0	.	.	0	1	1	1	1	.	.	.	.	.	.	.	.	.	1	0	0	0	0	.
1	2557432	AAAACAGGT.CCGGTAGAA_R	C	T	.	.	NS=6;AF=0.100	GT	.	.	.	.	.	.	.	0	.	.	0	.	.	.	.	.	.	.	.	.	.	.	.	.	.	1	1	1	0	.
1	3027731	AAAACAGGT.CTTGCTCAA_R	T	C	.	.	NS=16;AF=0.033	GT	0	0	0	.	.	.	.	0	1	0	0	0	0	0	0	.	.	.	.	.	.	.	.	.	0	0	0	0	0	.
1	3517816	AAAACAGGT.GACCGTACC_R	G	A	.	.	NS=26;AF=0.800	GT	1	.	.	1	1	1	.	0	1	1	0	1	1	1	1	1	1	1	1	1	1	1	1	1	1	1	1	1	.	1
1	2832022	AAAACAGGT.GCGATTGCC_R	A	G	.	.	NS=13;AF=0.367	GT	1	1	1	1	1	.	.	1	1	1	0	.	.	.	.	.	.	.	.	.	.	.	.	.	.	1	1	1	0	.
1	4542254	AAAACAGGT.GTGAATAAA_F	T	G	.	.	NS=19;AF=0.100	GT	.	0	0	0	.	0	.	.	0	.	0	.	.	.	0	0	.	0	0	0	0	0	0	0	.	1	1	1	0	.
1	4225416	AAAACAGGT.TGGGCAGGG_F	C	T	.	.	NS=5;AF=0.100	GT	1	1	1	.	.	.	.	0	.	.	0	.	.	.	.	.	.	.	.	.	.	.	.	.	.	.	.	.	.	.
1	573284	AAAACAGGT.TTAGCCCTC_R	G	A	.	.	NS=5;AF=0.067	GT	.	.	.	1	1	.	.	0	.	.	0	.	.	.	.	.	.	.	.	.	.	.	.	.	.	.	.	.	0	.
1	3810483	AAAACAGTA.CAGGAAATT_R	G	A	.	.	NS=12;AF=0.067	GT	.	.	.	.	.	0	.	.	.	.	0	.	.	.	.	0	0	0	0	0	1	1	0	0	.	.	.	.	0	.
1	820923	AAAACAGTC.ACCGTGATG_R	G	A	.	.	NS=28;AF=0.033	GT	0	0	0	0	0	0	0	0	0	0	0	0	1	0	0	0	0	0	0	0	0	0	0	0	.	0	0	0	0	.
1	2255610	AAAACAGTC.CTGTGGAAC_F	G	A,T	.	.	NS=8;AF=0.067,0.100	GT	.	1	1	2	2	.	.	0	.	2	0	.	.	.	.	.	.	.	.	.	.	.	.	.	.	.	.	.	0	.
1	1224249	AAAACAGTG.GGATACTGG_F	G	A	.	.	NS=27;AF=0.167	GT	0	0	0	0	0	0	0	.	1	1	0	0	0	0	.	0	0	0	0	0	0	0	0	0	0	1	1	1	0	.
1	3638945	AAAACAGTT.CCTACCTGC_F	T	C	.	.	NS=11;AF=0.100	GT	.	.	.	.	.	.	.	0	.	.	0	.	.	.	.	0	0	0	0	0	1	1	0	1	.	.	.	.	.	.
1	873392	AAAACAGTT.GGTTCTCAG_F	C	T	.	.	NS=13;AF=0.333	GT	1	1	1	1	1	.	1	0	.	1	0	.	.	.	.	.	.	.	.	.	.	.	.	.	.	1	1	1	0	.
1	652182	AAAACAGTT.TCGTTGACG_R	G	A	.	.	NS=17;AF=0.033	GT	0	0	1	0	0	.	0	0	.	0	0	0	0	0	0	.	.	.	.	.	.	.	.	.	.	0	0	0	0	.
1	615249	AAAACAGTT.TTCAGCCAG_R	C	T	.	.	NS=3;AF=0.067	GT	.	.	.	.	.	.	.	1	.	.	0	.	.	.	.	.	.	.	.	.	.	.	.	.	.	.	.	.	1	.
1	2685358	AAAACATAC.AGCAAATAT_R	A	C	.	.	NS=8;AF=0.233	GT	.	.	.	.	1	.	1	.	.	.	0	1	1	1	1	.	.	.	.	.	.	.	.	.	1	.	.	.	.	.
1	1523019	AAAACATAC.GACAAAGTC_F	C	T	.	.	NS=2;AF=0.033	GT	.	.	.	.	.	.	.	.	.	.	0	.	.	.	.	.	.	.	.	.	.	.	.	.	.	.	.	.	1	.
1	3734358	AAAACATAG.GAGTCCTTA_R	C	A	.	.	NS=30;AF=0.900	GT	1	1	1	1	1	1	1	0	1	1	0	1	1	1	1	1	1	1	1	1	1	1	1	1	1	1	1	1	0	1
1	1841161	AAAACATAT.CGTCAAATT_R	G	A	.	.	NS=2;AF=0.033	GT	.	.	.	.	.	.	.	1	.	.	0	.	.	.	.	.	.	.	.	.	.	.	.	.	.	.	.	.	.	.
1	1377913	AAAACATAT.GGCTACGTC_R	A	G	.	.	NS=12;AF=0.333	GT	1	1	.	.	.	.	1	.	.	.	0	1	1	1	1	.	.	.	.	.	.	.	.	.	1	.	1	1	0	.
1	3900531	AAAACATAT.GTTGCCAAC_F	C	T	.	.	NS=19;AF=0.033	GT	1	0	0	0	0	.	0	0	0	0	0	0	0	0	0	.	.	.	.	.	.	.	.	.	0	0	0	0	0	.
1	2253925	AAAACATCA.AAATTGATG_R	T	C	.	.	NS=13;AF=0.300	GT	.	.	.	.	.	0	.	0	.	.	0	.	.	.	.	1	1	1	1	1	1	1	1	1	.	.	.	.	0	.
1	1279954	AAAACATCA.AATAATTGC_R	G	A	.	.	NS=24;AF=0.033	GT	0	0	0	0	0	1	0	0	0	0	0	.	.	.	.	0	0	0	0	0	0	0	0	0	.	0	0	0	0	.
1	3677518	AAAACATCA.CCTGTTTTA_F	A	C,T	.	.	NS=6;AF=0.067,0.033	GT	2	.	.	.	.	.	.	0	.	1	0	.	.	.	.	.	.	.	.	.	.	.	.	.	.	.	.	.	0	1
1	2911641	AAAACATCA.CGGCGATGG_F	C	G	.	.	NS=11;AF=0.300	GT	.	.	.	.	.	.	.	.	.	.	0	.	.	.	.	1	1	1	1	1	1	1	1	1	.	.	.	.	0	.
1	336476	AAAACATCA.TACCGCACT_F	G	A	.	.	NS=11;AF=0.067	GT	0	0	.	.	.	1	0	0	1	.	0	.	.	.	.	.	.	.	.	.	.	.	.	.	.	0	0	0	0	.
1	4463913	AAAACATCA.TCCGAACCA_R	A	G	.	.	NS=5;AF=0.033	GT	.	.	.	0	0	.	.	0	1	.	0	.	.	.	.	.	.	.	.	.	.	.	.	.	.	.	.	.	.	.
1	2101233	AAAACATCG.GAACAGAGT_F	T	C	.	.	NS=6;AF=0.100	GT	.	.	.	1	1	.	.	0	.	1	0	.	.	.	.	.	.	.	.	.	.	.	.	.	.	.	.	.	0	.
1	3678053	AAAACATCG.GCTGACCGA_R	C	T	.	.	NS=4;AF=0.033	GT	.	.	.	.	.	.	.	0	.	.	0	.	1	.	.	.	.	.	.	.	.	.	.	.	.	.	.	.	0	.
1	1555049	AAAACATCG.TTTTTAGTA_R	A	T	.	.	NS=30;AF=0.533	GT	0	0	0	0	0	1	0	0	0	0	0	1	1	1	1	1	1	1	1	1	1	1	1	1	1	0	0	0	0	1
1	2918653	AAAACATCT.CCAGGATAT_F	T	A	.	.	NS=28;AF=0.033	GT	0	0	0	0	0	1	0	0	0	0	0	0	0	0	0	0	0	0	0	0	0	0	0	0	0	0	0	0	.	.
1	80916	AAAACATCT.TACTCCATC_R	A	C	.	.	NS=14;AF=0.300	GT	.	.	.	0	0	.	.	0	1	.	0	.	.	.	.	1	1	.	1	1	1	1	1	1	.	.	.	.	0	.
1	606681	AAAACATCT.TTAGTGATT_F	A	T	.	.	NS=5;AF=0.133	GT	.	1	1	.	.	.	.	1	.	.	0	.	.	.	.	.	.	.	.	.	.	.	.	.	.	.	.	.	1	.
1	1953699	AAAACATGA.AGCTATCTA_F	C	A	.	.	NS=11;AF=0.033	GT	.	.	.	.	.	.	.	0	.	.	0	0	0	0	0	.	.	.	.	.	.	.	.	.	0	0	1	0	0	.
1	3546781	AAAACATGA.GATATGTAC_F	G	A	.	.	NS=23;AF=0.200	GT	.	.	.	0	0	.	.	0	1	0	0	1	1	1	1	0	0	0	0	0	0	0	0	.	1	0	0	0	0	.
1	2892978	AAAACATGC.AAGGGTGAA_R	C	G	.	.	NS=16;AF=0.300	GT	.	.	.	.	.	.	.	0	.	0	0	.	.	.	.	1	1	1	1	1	1	1	1	1	.	0	0	0	0	.
1	2278770	AAAACATGG.GCAGGAGGG_F	A	C	.	.	NS=11;AF=0.200	GT	0	0	0	.	.	.	1	.	.	.	0	1	1	1	1	.	.	.	.	.	.	.	.	.	1	.	.	.	0	.
1	1492053	AAAACATGT.CTGCCGCTG_F	C	A	.	.	NS=8;AF=0.167	GT	.	.	.	.	.	.	.	0	.	.	0	1	1	1	1	.	.	.	.	.	.	.	.	.	1	.	.	.	0	.
1	1371660	AAAACATGT.GCAGAAGTC_F	G	C	.	.	NS=3;AF=0.033	GT	.	.	.	.	.	.	.	1	.	.	0	.	.	.	.	.	.	.	.	.	.	.	.	.	.	.	.	.	0	.
1	1853128	AAAACATTA.CTGCAGGCG_F	A	G	.	.	NS=24;AF=0.067	GT	0	0	0	0	0	0	1	0	.	0	0	.	.	.	.	0	0	0	0	0	0	0	0	0	.	0	0	1	0	0
1	2269510	AAAACATTC.AGTTTGCGG_F	C	A,G	.	.	NS=11;AF=0.033,0.033	GT	0	0	0	0	0	.	.	0	.	1	0	.	.	.	.	.	.	.	.	.	.	.	.	2	.	.	0	.	0	.
1	1309102	AAAACATTC.CGCAGGATA_F	G	A	.	.	NS=21;AF=0.200	GT	0	0	1	1	1	0	0	0	0	1	0	0	0	0	0	.	.	.	.	.	.	.	.	.	0	1	0	1	0	0
1	520799	AAAACATTC.GTTAACATG_R	A	T	.	.	NS=29;AF=0.300	GT	0	0	0	0	0	.	0	0	0	0	0	0	0	0	0	1	1	1	1	1	1	1	1	1	0	0	0	0	0	0
1	2436108	AAAACATTT.ATATCTACG_F	G	A	.	.	NS=22;AF=0.133	GT	0	0	0	0	0	.	.	0	.	0	0	.	.	.	.	0	0	0	0	0	0	0	0	0	.	1	1	1	0	1
1	861746	AAAACCAAA.AAGCCAGAG_F	A	G	.	.	NS=8;AF=0.167	GT	1	1	1	.	.	.	1	0	.	.	0	.	.	.	.	.	.	.	.	.	.	.	.	.	.	.	.	1	0	.
1	3603996	AAAACCAAA.AAGGTGCCA_F	G	C	.	.	NS=24;AF=0.033	GT	.	0	0	0	0	1	0	0	0	0	0	0	.	.	0	0	0	0	0	0	0	0	.	0	0	0	0	0	.	.
1	3671321	AAAACCAAA.ACAGCGTCG_R	A	G	.	.	NS=10;AF=0.033	GT	0	.	.	.	.	.	0	0	.	.	0	0	0	0	.	.	.	.	.	.	.	.	.	.	0	.	.	.	0	1
1	1275146	AAAACCAAA.CAGACGCCA_F	G	A	.	.	NS=12;AF=0.167	GT	.	.	.	0	0	.	.	0	0	0	0	1	1	1	1	.	.	.	.	.	.	.	.	.	1	.	.	.	0	.
1	3693287	AAAACCAAA.CCGGCCCAG_F	A	C,G	.	.	NS=22;AF=0.100,0.033	GT	0	0	0	0	0	.	0	0	.	2	0	.	.	.	.	0	0	0	0	0	0	0	0	0	.	1	1	1	0	.
1	1402055	AAAACCAAA.CGAAAGGCC_F	G	A	.	.	NS=7;AF=0.033	GT	.	.	.	.	.	.	1	0	.	.	0	.	.	.	.	.	.	.	.	.	.	.	.	.	.	0	0	0	0	.
1	3880897	AAAACCAAA.GCGTTAGAT_F	C	G	.	.	NS=30;AF=0.033	GT	0	0	0	0	0	0	0	0	0	0	0	0	0	0	0	0	0	0	0	0	0	0	0	0	0	0	0	0	0	1
1	783228	AAAACCAAC.AGATCGTGT_R	C	G	.	.	NS=6;AF=0.100	GT	1	1	1	.	.	.	.	0	.	.	0	.	.	.	.	.	.	.	.	.	.	.	.	.	.	.	.	.	0	.
1	2599473	AAAACCAAC.AGGTGCTGG_F	C	G	.	.	NS=4;AF=0.033	GT	.	.	.	.	.	.	.	0	.	.	0	.	.	.	.	.	.	.	.	.	.	.	.	.	.	.	.	.	0	1
1	1929179	AAAACCAAC.CGTTTGCCG_R	T	C	.	.	NS=5;AF=0.067	GT	1	1	.	.	.	.	.	0	.	.	0	.	.	.	.	.	.	.	.	.	.	.	.	.	.	.	.	.	0	.
1	1770434	AAAACCAAC.GACAAACGT_F	G	A,T	.	.	NS=12;AF=0.033,0.033	GT	.	.	.	0	0	.	.	0	0	2	0	0	0	0	0	.	.	.	.	.	.	.	.	.	0	.	.	.	1	.
1	3369080	AAAACCAAC.TCCTGGCCG_R	T	C	.	.	NS=11;AF=0.033	GT	0	0	0	0	0	1	0	0	.	0	0	.	.	.	.	.	.	.	.	.	.	.	.	.	.	.	.	.	0	.
1	2918448	AAAACCAAT.ACAAACACC_R	C	G	.	.	NS=10;AF=0.100	GT	.	.	.	1	1	.	0	0	0	1	0	.	.	.	.	.	.	.	.	.	.	.	.	.	.	0	0	0	.	.
1	2330596	AAAACCAAT.ACCACGATC_F	A	G	.	.	NS=19;AF=0.167	GT	0	0	0	1	1	.	0	1	0	1	0	0	0	0	0	.	.	.	.	.	.	.	.	.	0	0	0	0	1	.
1	4010125	AAAACCAAT.ACCCGGCCA_R	G	A,C,T	.	.	NS=24;AF=0.133,0.067,0.033	GT	1	.	.	1	1	2	2	0	.	1	0	0	0	0	0	0	0	0	0	0	0	0	0	0	0	.	.	.	0	3
1	2420392	AAAACCAAT.ACCGAACCG_F	A	C	.	.	NS=4;AF=0.033	GT	.	.	.	.	.	.	.	.	0	.	0	.	.	.	.	.	.	.	.	.	.	.	.	.	.	.	1	.	0	.
1	1616456	AAAACCAAT.ACCGCACGC_F	C	T	.	.	NS=3;AF=0.067	GT	.	.	.	.	.	.	.	.	.	.	0	.	.	.	.	.	1	.	.	.	.	.	.	1	.	.	.	.	.	.
1	1121000	AAAACCAAT.ATCACGGTT_F	G	A,T	.	.	NS=14;AF=0.100,0.033	GT	0	0	0	.	.	.	.	0	1	2	0	0	0	0	0	.	.	.	.	.	.	.	.	.	0	.	.	.	1	1
1	1538325	AAAACCAAT.CCTAATTCC_F	A	C,G	.	.	NS=24;AF=0.033,0.267	GT	.	.	.	0	0	2	2	0	2	0	0	2	2	2	2	0	0	0	0	0	0	0	0	0	2	.	.	.	0	1
1	3607119	AAAACCAAT.CCTCTATTA_F	T	A	.	.	NS=10;AF=0.233	GT	.	.	.	.	.	.	.	0	.	.	0	.	.	.	.	1	1	1	1	1	.	.	1	1	.	.	.	.	0	.
1	2555414	AAAACCAAT.CGGCCCAGT_F	A	G	.	.	NS=4;AF=0.033	GT	.	.	.	.	.	.	.	0	1	.	0	.	.	.	.	.	.	.	.	.	.	.	.	.	.	.	.	.	0	.
1	15622	AAAACCAAT.GCAGAACGG_R	A	T	.	.	NS=29;AF=0.033	GT	0	0	0	0	0	1	0	0	0	0	0	0	0	0	0	0	0	0	0	0	0	0	0	0	0	0	0	0	0	.
1	1930756	AAAACCAAT.GCCCCCGCG_R	A	G	.	.	NS=3;AF=0.033	GT	.	.	.	.	.	.	.	0	.	.	0	.	.	.	.	.	.	.	.	.	.	.	.	.	.	.	.	.	1	.
1	2175342	AAAACCAAT.GCGTCCAGC_R	G	A	.	.	NS=11;AF=0.033	GT	.	0	0	0	1	.	.	0	.	0	0	.	.	.	.	.	.	.	.	.	.	.	.	.	.	0	0	0	0	.
1	4492601	AAAACCAAT.TCGAACACG_F	G	A	.	.	NS=28;AF=0.033	GT	0	0	0	0	0	1	0	0	0	0	0	0	0	0	0	0	.	0	0	0	0	0	0	0	0	0	0	0	0	.
1	3511104	AAAACCAAT.TTCTGGGCA_R	G	A	.	.	NS=4;AF=0.033	GT	.	.	.	.	.	1	.	0	.	.	0	.	.	.	.	.	.	.	.	.	.	.	.	.	.	.	.	.	0	.
1	11498	AAAACCAAT.TTGCGCAAC_R	C	T	.	.	NS=8;AF=0.167	GT	.	.	.	.	.	.	.	0	.	.	0	.	.	.	.	1	1	1	.	.	.	.	1	1	.	.	.	.	0	.
1	4341491	AAAACCACA.CTACCCGCT_F	C	A	.	.	NS=23;AF=0.667	GT	.	1	1	1	1	1	1	0	1	1	0	.	.	.	.	1	1	1	1	1	1	1	1	1	.	1	1	1	0	.
1	1470568	AAAACCACC.AACCGGAAG_F	A	C	.	.	NS=8;AF=0.033	GT	0	0	0	0	.	.	0	0	.	.	0	.	.	.	.	.	.	.	.	.	.	.	.	.	.	.	.	.	.	1
1	3843119	AAAACCACC.ACCACCAGA_F	G	A	.	.	NS=6;AF=0.133	GT	.	.	.	.	1	.	.	.	.	.	0	.	.	.	.	.	.	.	.	.	.	.	.	.	.	1	1	1	0	.
1	2137221	AAAACCACC.TCTCCGGGG_F	A	G	.	.	NS=19;AF=0.600	GT	.	1	1	1	1	.	1	.	1	.	0	1	.	1	1	1	1	1	1	1	1	1	1	1	.	.	.	.	.	.
1	4674268	AAAACCACC.TGACGTAAC_F	G	A	.	.	NS=8;AF=0.133	GT	.	.	.	.	.	.	.	0	0	1	0	.	.	.	.	.	.	.	.	.	.	.	.	.	.	1	1	1	0	.
1	3943322	AAAACCACG.CCCTGCTCG_F	T	A,C,G	.	.	NS=13;AF=0.033,0.367,0.100	GT	0	.	2	.	.	.	3	3	1	.	0	2	2	2	2	.	.	.	.	.	.	.	.	.	.	2	2	2	.	.
1	608425	AAAACCACG.CCCTGCTCG_R	T	A,C,G	.	.	NS=13;AF=0.033,0.367,0.100	GT	0	.	2	.	.	.	3	3	1	.	0	2	2	2	2	.	.	.	.	.	.	.	.	.	.	2	2	2	.	.
1	150279	AAAACCACG.GAATTAAAA_R	G	C	.	.	NS=9;AF=0.033	GT	0	.	.	.	.	.	1	0	.	.	0	.	0	.	.	.	.	.	.	.	.	.	.	.	.	0	0	0	0	.
1	4164926	AAAACCACG.GCTTCCAGC_R	C	G	.	.	NS=8;AF=0.167	GT	.	.	.	.	.	.	.	0	.	.	0	1	1	1	1	.	.	.	.	.	.	.	.	.	1	.	.	.	0	.
1	145919	AAAACCACG.TACTGCAGG_F	T	C	.	.	NS=10;AF=0.067	GT	.	1	1	0	0	.	.	0	.	.	0	.	.	.	.	.	.	.	.	.	.	.	.	.	.	0	0	0	0	.
1	1276487	AAAACCACG.TGCCGATCT_R	A	G	.	.	NS=6;AF=0.100	GT	.	.	.	1	1	.	.	0	.	1	0	.	.	.	.	.	.	.	.	.	.	.	.	.	.	.	.	.	0	.
1	3918514	AAAACCACT.ATCTTTTTA_F	A	C	.	.	NS=4;AF=0.067	GT	.	.	.	1	1	.	.	0	.	.	0	.	.	.	.	.	.	.	.	.	.	.	.	.	.	.	.	.	.	.
1	93344	AAAACCACT.CAACTACAT_R	T	C	.	.	NS=2;AF=0.033	GT	.	.	.	.	.	.	.	1	.	.	0	.	.	.	.	.	.	.	.	.	.	.	.	.	.	.	.	.	.	.
1	1790613	AAAACCACT.CAGGTAGAA_R	C	T	.	.	NS=26;AF=0.033	GT	0	0	0	0	0	.	.	0	0	0	0	0	0	0	0	0	0	0	0	0	0	0	0	0	0	1	.	0	0	.
1	419324	AAAACCACT.CGGAGAAGG_R	A	C	.	.	NS=20;AF=0.100	GT	.	.	.	0	0	.	.	0	0	0	0	.	.	.	.	0	0	0	0	0	0	0	0	0	.	1	1	1	0	0
1	2618283	AAAACCACT.GTTGAGAGC_R	G	C	.	.	NS=4;AF=0.033	GT	.	.	.	.	.	.	.	0	1	.	0	.	.	.	.	.	.	.	.	.	.	.	.	.	.	.	.	.	0	.
1	1024580	AAAACCAGA.ATAAACAGC_R	T	C	.	.	NS=4;AF=0.033	GT	.	.	.	.	.	.	.	0	1	.	0	.	.	.	.	.	.	.	.	.	.	.	.	.	.	.	.	.	0	.
1	1013526	AAAACCAGA.CCAGCAGGC_R	A	G	.	.	NS=7;AF=0.033	GT	.	.	.	.	.	.	1	0	.	.	0	.	.	.	.	.	.	.	.	.	.	.	.	.	.	0	0	0	0	.
1	2962346	AAAACCAGC.GCGCCAGCA_F	T	G	.	.	NS=3;AF=0.033	GT	.	.	.	.	.	.	1	0	.	.	0	.	.	.	.	.	.	.	.	.	.	.	.	.	.	.	.	.	.	.
1	487517	AAAACCAGG.AAGCTGGAA_F	C	T	.	.	NS=11;AF=0.033	GT	0	.	0	.	.	.	.	0	1	.	0	0	0	0	.	.	.	.	.	.	.	.	.	.	0	.	0	.	0	.
1	2840710	AAAACCAGG.GATGTTCGC_F	C	A	.	.	NS=16;AF=0.300	GT	.	.	0	.	.	.	.	0	.	.	0	.	.	.	.	1	1	1	1	1	1	1	1	1	.	0	0	0	0	.
1	3802963	AAAACCAGG.GATTATGTT_R	A	G	.	.	NS=20;AF=0.233	GT	.	.	.	1	1	.	.	0	.	0	0	1	1	1	1	0	0	0	0	0	0	0	0	0	1	.	.	.	0	.
1	1400139	AAAACCAGT.GCATGTCAG_R	C	T	.	.	NS=23;AF=0.667	GT	.	1	1	.	.	1	1	0	1	.	0	1	.	1	.	1	1	1	1	1	1	1	1	1	1	1	1	1	0	.
1	4446091	AAAACCAGT.TTATTGACT_F	G	T	.	.	NS=7;AF=0.133	GT	.	.	.	.	.	.	.	0	1	.	0	.	.	.	.	.	.	.	.	.	.	.	.	.	.	1	1	1	0	.
1	685856	AAAACCATA.CGACCGTGA_R	G	T	.	.	NS=3;AF=0.033	GT	.	.	.	.	.	.	.	1	.	.	0	.	.	.	.	.	.	.	.	.	.	.	.	.	.	.	.	.	0	.
1	2224676	AAAACCATA.TCGTTGTCA_F	T	C	.	.	NS=4;AF=0.033	GT	.	.	.	.	.	.	.	.	0	1	0	.	.	.	.	.	.	.	.	.	.	.	.	.	.	.	.	.	0	.
1	127380	AAAACCATC.ATCGCCAGA_F	G	A	.	.	NS=10;AF=0.033	GT	1	0	0	0	0	.	.	0	0	0	0	.	.	.	.	.	.	.	.	.	.	.	.	.	.	.	.	.	0	.
1	3867364	AAAACCATC.TAAAATGAT_R	C	G	.	.	NS=20;AF=0.033	GT	0	0	0	0	0	0	1	0	0	0	0	0	0	0	0	.	.	.	.	.	.	.	.	.	0	0	0	0	0	.
1	4058298	AAAACCATG.ATGACATCG_R	C	G	.	.	NS=14;AF=0.033	GT	.	.	.	.	.	.	.	0	.	.	0	0	0	0	0	0	0	0	.	.	0	0	0	.	0	.	.	.	.	1
1	1863368	AAAACCATG.TAAAAAGAC_F	T	C	.	.	NS=3;AF=0.067	GT	.	.	.	.	.	.	.	1	.	.	0	.	.	.	.	.	.	.	.	.	.	.	.	.	.	.	.	.	1	.
1	912535	AAAACCATG.TGGCCGTCG_F	C	T	.	.	NS=3;AF=0.033	GT	.	.	.	.	.	.	.	0	.	.	0	.	.	.	.	.	.	.	.	.	.	.	.	.	.	.	.	.	1	.
1	352597	AAAACCATT.TCTATTTCG_F	A	C	.	.	NS=15;AF=0.133	GT	0	0	0	.	.	.	0	0	0	1	0	1	.	.	1	.	.	.	.	.	.	.	.	.	1	0	0	0	0	.
1	3100021	AAAACCATT.TGCGCCGCT_F	C	T	.	.	NS=25;AF=0.033	GT	0	.	.	0	0	.	.	0	0	0	0	0	0	0	0	0	0	0	0	0	0	0	0	0	0	0	0	.	1	0
1	3782470	AAAACCCAA.CATTTTCTC_R	A	G	.	.	NS=12;AF=0.033	GT	.	.	.	.	.	.	.	0	.	.	0	.	.	.	.	0	0	1	0	0	0	0	0	0	.	.	.	.	0	.
1	3936869	AAAACCCAA.CTGAAATGG_R	G	A	.	.	NS=7;AF=0.033	GT	0	0	0	.	.	.	.	0	.	.	0	.	.	.	.	.	.	.	.	.	.	.	.	.	.	.	.	.	0	1
1	1917228	AAAACCCAC.AAACTGTCA_F	G	A,T	.	.	NS=25;AF=0.433,0.033	GT	1	1	1	0	0	.	1	0	1	0	0	0	0	0	0	1	.	1	1	1	1	1	1	1	0	.	.	.	0	2
1	2602073	AAAACCCAC.CCGAACAGC_R	T	C	.	.	NS=10;AF=0.133	GT	1	1	1	.	.	.	1	0	.	.	0	.	.	.	.	.	.	.	.	.	.	.	.	.	.	0	0	0	0	.
1	2110132	AAAACCCAC.TAACCACCC_R	A	G	.	.	NS=14;AF=0.033	GT	.	0	0	.	.	.	1	0	.	.	0	0	0	0	0	.	.	.	.	.	.	.	.	.	0	0	0	0	0	.
1	4585149	AAAACCCAG.ACAAATTTA_R	A	G,T	.	.	NS=11;AF=0.233,0.033	GT	1	1	2	.	.	.	.	0	.	.	0	1	1	1	1	.	.	.	.	.	.	.	.	.	1	.	.	.	0	.
1	3132272	AAAACCCAG.CGATGGCCG_R	T	C	.	.	NS=4;AF=0.033	GT	.	.	.	.	.	.	1	0	.	.	0	.	.	.	.	.	.	.	.	.	.	.	.	.	.	.	.	.	0	.
1	22436	AAAACCCAG.GCGGTGCGG_R	A	G	.	.	NS=4;AF=0.033	GT	.	.	.	.	.	.	.	0	.	1	0	.	.	.	.	.	.	.	.	.	.	.	.	.	.	.	.	.	0	.
1	164253	AAAACCCAG.TCTTTTGAA_R	G	A	.	.	NS=3;AF=0.033	GT	.	.	.	.	.	.	.	.	1	.	0	.	.	.	.	.	.	.	.	.	.	.	.	.	.	.	.	.	0	.
1	1058157	AAAACCCAT.CCCGCAATG_F	C	T	.	.	NS=3;AF=0.033	GT	.	.	.	.	.	.	1	0	.	.	0	.	.	.	.	.	.	.	.	.	.	.	.	.	.	.	.	.	.	.
1	3188109	AAAACCCAT.CCGGGGAGT_R	T	A	.	.	NS=5;AF=0.067	GT	.	1	1	.	.	.	.	0	.	.	0	.	.	.	.	.	.	.	.	.	.	.	.	.	.	.	.	.	0	.
1	2553429	AAAACCCAT.GCTTTGATG_F	C	T	.	.	NS=22;AF=0.033	GT	.	.	1	0	0	.	0	0	.	0	0	0	0	0	0	0	0	0	0	0	0	0	0	0	.	.	.	.	0	0
1	4170012	AAAACCCAT.TGCATACGC_F	C	T	.	.	NS=20;AF=0.300	GT	0	0	0	.	.	0	0	0	.	.	0	.	.	.	.	1	1	1	1	1	1	1	1	1	.	0	0	0	0	.
1	421989	AAAACCCCG.AAGTATACC_F	C	A	.	.	NS=30;AF=0.300	GT	0	0	0	0	0	0	0	0	0	0	0	0	0	0	0	1	1	1	1	1	1	1	1	1	0	0	0	0	0	0
1	4643240	AAAACCCCG.CACAAGGAC_F	C	A	.	.	NS=4;AF=0.033	GT	.	.	.	.	.	.	.	0	1	.	0	.	.	.	.	.	.	.	.	.	.	.	.	.	.	.	.	.	0	.
1	1757910	AAAACCCCG.TGTGGGTGC_F	G	A	.	.	NS=3;AF=0.033	GT	.	.	.	.	.	.	.	0	.	.	0	.	.	.	.	.	.	.	.	.	.	.	.	.	.	.	.	.	1	.
1	345774	AAAACCCCT.ACAACACTG_F	C	T	.	.	NS=10;AF=0.067	GT	0	0	0	.	.	.	.	0	.	.	0	.	.	.	0	.	.	.	.	.	.	.	.	.	.	1	1	0	0	.
1	2239284	AAAACCCGA.CAGATGATC_R	A	G	.	.	NS=27;AF=0.433	GT	1	1	1	0	0	.	1	1	1	0	0	1	1	1	1	0	0	0	0	0	0	0	0	0	1	1	.	1	0	.
1	4176230	AAAACCCGA.GCCTGCATA_F	T	A	.	.	NS=6;AF=0.100	GT	.	.	.	.	.	.	.	0	.	.	0	.	.	.	.	.	.	.	.	.	.	.	.	.	.	1	1	1	0	.
1	434594	AAAACCCGC.AACCGTGAA_F	C	T	.	.	NS=4;AF=0.033	GT	.	.	.	.	.	.	.	0	.	.	0	.	.	.	.	.	.	.	.	.	.	.	.	.	.	.	.	.	0	1
1	1277768	AAAACCCGC.CCCCAGGGA_R	G	A	.	.	NS=5;AF=0.067	GT	.	.	.	1	1	.	.	.	.	0	0	.	.	.	.	.	.	.	.	.	.	.	.	.	.	.	.	.	0	.
1	4264305	AAAACCCGC.CCGGCGGGT_R	A	G	.	.	NS=10;AF=0.033	GT	0	0	0	.	1	.	.	0	.	.	0	.	.	.	.	.	.	.	.	.	.	.	.	.	.	0	0	0	0	.
1	4541447	AAAACCCGC.CGCATGATG_F	G	A	.	.	NS=5;AF=0.067	GT	.	1	1	.	.	.	.	.	0	.	0	.	.	.	.	.	.	.	.	.	.	.	.	.	.	.	.	.	0	.
1	4179365	AAAACCCGC.CGGTTCAGC_R	C	G,T	.	.	NS=6;AF=0.033,0.033	GT	.	.	.	.	.	0	.	0	2	.	0	.	.	.	.	.	.	.	.	.	.	.	1	.	.	.	.	.	0	.
1	3200420	AAAACCCGC.GACCAGCGA_F	C	T	.	.	NS=28;AF=0.033	GT	0	.	.	0	0	0	0	0	1	0	0	0	0	0	0	0	0	0	0	0	0	0	0	0	0	0	0	0	0	0
1	331116	AAAACCCGC.GCAGCGAGA_R	T	C,G	.	.	NS=14;AF=0.033,0.133	GT	0	0	0	.	.	.	1	0	.	.	0	2	2	2	2	.	.	.	.	.	.	.	.	.	.	0	0	0	0	.
1	938907	AAAACCCGC.GGCGGCCAT_F	A	C	.	.	NS=8;AF=0.067	GT	.	1	1	0	0	.	.	0	.	0	0	.	.	.	.	.	.	.	.	.	.	.	.	.	.	.	.	.	0	.
1	4223345	AAAACCCGC.GTCATGAAA_R	C	T	.	.	NS=10;AF=0.033	GT	0	0	1	.	.	.	0	0	.	.	0	.	.	.	.	.	.	.	.	.	.	.	.	.	.	0	0	0	0	.
1	2534746	AAAACCCGC.GTTAATCAA_R	C	A	.	.	NS=5;AF=0.067	GT	.	.	.	1	1	.	.	0	.	.	0	.	.	.	.	.	.	.	.	.	.	.	.	.	.	.	.	.	0	.
1	2126451	AAAACCCGC.TCAGCGCGG_F	G	C	.	.	NS=3;AF=0.033	GT	.	.	.	.	.	.	.	0	1	.	0	.	.	.	.	.	.	.	.	.	.	.	.	.	.	.	.	.	.	.
1	3337065	AAAACCCGC.TGACGCTCG_F	G	C	.	.	NS=8;AF=0.233	GT	.	.	.	.	.	.	.	.	.	.	0	.	.	.	.	.	1	1	1	1	1	1	.	1	.	.	.	.	.	.
1	2198848	AAAACCCGC.TTGTTGACC_R	C	T	.	.	NS=3;AF=0.033	GT	.	.	1	.	.	.	.	.	.	.	0	.	.	.	.	.	.	.	.	.	.	.	.	.	.	.	.	0	.	.
1	3169670	AAAACCCGG.CAACAGCAA_R	C	A	.	.	NS=13;AF=0.133	GT	0	.	.	.	.	.	0	0	0	0	0	1	1	1	.	.	.	.	.	.	.	.	.	.	1	0	0	0	.	.
1	2345040	AAAACCCGG.CGCTGGATG_R	G	A	.	.	NS=13;AF=0.267	GT	.	.	.	0	0	.	.	.	.	0	0	.	.	.	.	1	.	1	1	1	1	1	1	1	.	.	.	.	0	.
1	3352425	AAAACCCGG.CTGCTGGCA_F	C	A	.	.	NS=3;AF=0.033	GT	.	.	.	.	.	.	.	.	.	.	0	.	.	.	.	.	.	.	.	.	.	.	.	.	.	.	.	1	0	.
1	2111125	AAAACCCGG.CTTTAACGA_R	T	G	.	.	NS=12;AF=0.033	GT	0	0	0	0	0	.	.	1	.	.	0	.	.	.	.	.	.	.	.	.	.	.	.	.	.	0	0	0	0	0
1	1041706	AAAACCCGG.GACTGGATC_F	C	T	.	.	NS=8;AF=0.067	GT	.	0	.	.	.	.	.	0	0	.	0	.	.	.	.	.	.	.	.	.	.	.	.	.	.	1	1	0	0	.
1	1167187	AAAACCCGG.GCATGGCCT_F	C	A	.	.	NS=8;AF=0.167	GT	.	.	.	.	1	.	.	0	.	1	0	.	.	.	.	.	.	.	.	.	.	.	.	.	.	1	1	1	0	.
1	2526690	AAAACCCGG.GCCATCGCA_R	G	A	.	.	NS=3;AF=0.033	GT	.	.	.	.	.	.	.	1	.	.	0	.	.	.	.	.	.	.	.	.	.	.	.	.	.	.	.	.	0	.
1	4612076	AAAACCCGG.GGATTTCTC_F	C	T	.	.	NS=29;AF=0.333	GT	0	0	0	1	1	1	0	0	1	1	0	1	1	1	1	0	0	0	0	0	0	0	0	0	1	0	0	0	0	.
1	605845	AAAACCCGG.GGTGGCTGA_R	A	T	.	.	NS=4;AF=0.033	GT	.	.	.	.	.	.	1	0	.	.	0	.	.	.	.	.	.	.	.	.	.	.	.	.	.	.	.	.	0	.
1	3643261	AAAACCCGT.CAGCCCGCC_F	A	G	.	.	NS=7;AF=0.100	GT	.	.	.	0	0	.	.	0	.	.	0	1	.	1	1	.	.	.	.	.	.	.	.	.	.	.	.	.	.	.
1	833232	AAAACCCGT.TACAAACGC_F	G	T	.	.	NS=29;AF=0.033	GT	0	0	0	0	0	0	0	0	0	0	0	0	0	0	0	0	0	0	0	0	0	0	0	0	.	0	0	0	0	1
1	3972261	AAAACCCGT.TGCTCGCTC_R	G	A	.	.	NS=3;AF=0.033	GT	.	.	.	.	.	.	.	1	.	.	0	.	.	.	.	.	.	.	.	.	.	.	.	.	.	.	.	.	0	.
1	1818735	AAAACCCTA.ATCAAGCAG_R	T	C	.	.	NS=19;AF=0.167	GT	.	.	.	.	.	.	.	.	.	.	0	1	1	1	1	0	0	0	0	0	0	0	0	0	1	0	0	0	0	.
1	2339962	AAAACCCTA.CTTGACGCG_F	T	C	.	.	NS=8;AF=0.133	GT	.	.	.	0	0	.	.	0	.	.	0	.	.	.	.	.	.	.	.	.	.	.	.	.	.	1	1	1	1	.
1	2295600	AAAACCCTC.CCCGGGAAG_F	T	A	.	.	NS=5;AF=0.100	GT	.	.	.	.	.	.	.	0	.	.	0	.	.	.	.	.	.	.	.	.	.	.	.	.	.	1	1	1	.	.
1	1488502	AAAACCCTC.CCGACGAAA_R	C	A	.	.	NS=12;AF=0.300	GT	1	1	1	1	.	.	.	0	1	1	0	.	.	.	.	.	.	.	.	.	.	.	.	.	.	1	1	1	0	.
1	4340977	AAAACCCTC.GACGGGGTA_F	T	A,C	.	.	NS=16;AF=0.033,0.033	GT	2	0	0	.	.	.	1	0	0	.	0	0	0	0	0	.	.	.	.	.	.	.	.	.	0	0	0	0	0	.
1	1244214	AAAACCCTC.GCGTCGAAG_R	C	A,T	.	.	NS=3;AF=0.033,0.033	GT	.	.	.	.	.	.	.	2	.	.	0	1	.	.	.	.	.	.	.	.	.	.	.	.	.	.	.	.	.	.
1	3001160	AAAACCCTC.GTAAAAGGC_F	T	A,G	.	.	NS=6;AF=0.067,0.033	GT	.	.	.	1	1	.	.	0	.	2	0	.	.	.	.	.	.	.	.	.	.	.	.	.	.	.	.	.	0	.
1	743838	AAAACCCTG.AACACTTCG_R	A	G	.	.	NS=5;AF=0.033	GT	.	.	.	.	.	1	0	0	.	.	0	.	.	.	.	.	.	.	.	.	.	.	.	.	.	.	.	.	0	.
1	527930	AAAACCCTG.CGGAGCTGA_R	G	C	.	.	NS=15;AF=0.133	GT	0	0	0	.	.	.	0	0	0	0	0	1	1	0	1	.	.	.	.	.	.	.	.	.	1	.	.	0	0	.
1	2573893	AAAACCCTG.CGTTCGTTG_R	G	A	.	.	NS=14;AF=0.033	GT	0	0	0	0	0	.	0	0	0	.	0	.	.	.	.	.	.	.	.	.	.	.	.	.	.	0	0	0	0	1
1	3878781	AAAACCCTG.CTGTCGGAT_R	C	T	.	.	NS=15;AF=0.167	GT	0	0	0	.	.	.	0	0	.	.	0	1	1	1	1	.	.	.	.	.	.	.	.	.	1	0	0	0	0	.
1	1801253	AAAACCCTG.GCCAGCGCG_F	A	G	.	.	NS=5;AF=0.067	GT	.	.	.	1	1	.	.	0	.	.	0	.	.	.	.	.	.	.	.	.	.	.	.	.	.	.	.	.	0	.
1	4516471	AAAACCCTG.TAATTTATA_F	T	G	.	.	NS=27;AF=0.333	GT	.	.	0	0	0	1	0	0	0	0	0	1	1	1	1	0	.	0	0	0	0	0	0	0	1	1	1	1	0	1
1	532184	AAAACCCTG.TGCAACAGC_F	C	T	.	.	NS=21;AF=0.300	GT	0	0	0	0	0	.	.	0	.	0	0	.	.	.	.	1	1	1	1	1	1	1	1	1	.	0	0	0	0	.
1	2775525	AAAACCCTG.TGGCGCTGG_R	G	A	.	.	NS=18;AF=0.033	GT	1	0	0	0	0	.	0	0	.	0	0	.	0	0	0	.	.	.	.	.	.	.	.	.	0	0	0	0	0	0
1	4183248	AAAACCCTG.TTGCGCGCG_R	A	G,T	.	.	NS=11;AF=0.200,0.067	GT	.	1	1	2	2	.	1	0	.	.	0	.	.	.	.	.	.	.	.	.	.	.	.	.	.	1	1	1	0	.
1	4342507	AAAACCCTT.CTAACGGAA_R	T	C	.	.	NS=29;AF=0.033	GT	0	0	0	0	0	1	0	0	0	0	0	0	0	0	0	0	0	0	0	0	0	0	0	0	0	0	0	0	0	.
1	2742368	AAAACCGAA.ACCTCCTTC_R	G	A	.	.	NS=12;AF=0.300	GT	.	.	.	.	.	.	.	0	.	.	0	.	.	.	.	1	1	1	1	1	1	1	1	1	.	.	.	.	0	.
1	957403	AAAACCGAA.CGAACGTAC_F	A	G	.	.	NS=8;AF=0.167	GT	.	.	.	.	.	.	.	0	.	.	0	1	1	1	1	.	.	.	.	.	.	.	.	.	1	.	.	.	0	.
1	2937732	AAAACCGAA.GACCCAAGC_F	C	T	.	.	NS=8;AF=0.067	GT	1	.	.	.	.	.	1	0	.	.	0	.	.	.	.	.	.	.	.	.	.	.	.	.	.	0	0	0	0	.
1	3466403	AAAACCGAA.TCATCCAGC_F	G	A	.	.	NS=12;AF=0.033	GT	0	0	0	0	0	.	.	0	.	0	0	.	.	0	0	.	.	.	.	.	.	.	.	.	.	.	.	.	1	0
1	353004	AAAACCGAA.TTCGCCACG_R	C	T	.	.	NS=11;AF=0.067	GT	0	1	1	.	.	.	0	0	.	0	0	.	.	.	.	.	.	.	.	.	.	.	.	.	.	0	0	0	0	.
1	1889012	AAAACCGAC.AACAGCGCC_R	T	C	.	.	NS=6;AF=0.067	GT	.	.	.	.	.	0	.	0	.	.	0	.	.	.	.	.	.	.	.	.	.	.	.	.	.	.	1	1	0	.
1	3296317	AAAACCGAC.AGTTCACCC_F	C	G	.	.	NS=9;AF=0.033	GT	0	.	.	.	.	0	0	0	.	.	0	.	.	.	.	.	.	.	.	.	.	.	.	.	.	0	0	0	1	.
1	4000790	AAAACCGAC.ATGCGCTGC_R	C	A	.	.	NS=3;AF=0.067	GT	.	.	.	.	.	.	.	1	.	.	0	.	.	.	.	.	.	.	.	.	.	.	.	.	.	.	.	.	1	.
1	52658	AAAACCGAC.CCGCCAGCA_R	T	C	.	.	NS=7;AF=0.067	GT	0	1	1	0	0	.	0	.	.	.	0	.	.	.	.	.	.	.	.	.	.	.	.	.	.	.	.	.	.	.
1	2041854	AAAACCGAC.GCAACCTGC_R	T	C	.	.	NS=4;AF=0.033	GT	.	.	.	.	.	.	.	0	.	.	0	.	.	.	.	.	.	.	.	.	.	.	.	.	.	.	.	1	0	.
1	3749659	AAAACCGAC.GCGGAGCAG_F	A	G	.	.	NS=5;AF=0.133	GT	.	1	1	.	.	.	.	1	.	.	0	.	.	.	.	.	.	.	.	.	.	.	.	.	.	.	.	.	1	.
1	2772270	AAAACCGAC.TCCAGTTCA_F	T	C	.	.	NS=5;AF=0.100	GT	.	.	.	.	.	.	.	0	.	.	0	1	.	.	1	.	.	.	.	.	.	.	.	.	1	.	.	.	.	.
1	4651880	AAAACCGAC.TCCGCAGCG_R	G	T	.	.	NS=4;AF=0.033	GT	.	.	.	.	.	1	.	0	.	.	0	.	.	.	.	.	.	.	.	.	.	.	.	.	.	.	.	.	0	.
1	982053	AAAACCGAG.ACCGGCACC_R	G	A	.	.	NS=14;AF=0.167	GT	0	.	.	0	0	.	.	0	.	0	0	1	1	1	1	.	.	.	.	.	.	.	.	.	1	.	0	0	0	.
1	4574451	AAAACCGAG.AGCAGCTGA_F	C	A	.	.	NS=24;AF=0.033	GT	0	.	.	0	.	1	0	0	.	0	0	0	0	0	0	0	0	0	0	0	0	0	.	0	0	0	0	0	0	.
1	4629154	AAAACCGAG.GAGGCATAC_F	C	T	.	.	NS=4;AF=0.033	GT	.	.	.	.	.	.	1	0	.	.	0	.	.	.	.	.	.	.	.	.	.	.	.	.	.	.	.	.	0	.
1	2383535	AAAACCGAG.GCGGAAATC_R	G	C	.	.	NS=7;AF=0.167	GT	1	1	1	.	.	.	1	.	.	1	0	.	.	.	.	.	.	.	.	.	.	.	.	.	.	.	.	.	0	.
1	3295293	AAAACCGAG.GTAATAATA_F	G	C	.	.	NS=21;AF=0.200	GT	0	.	0	.	.	.	0	0	.	0	0	0	0	0	0	.	1	1	.	.	1	1	1	1	0	0	0	0	0	.
1	2453674	AAAACCGAG.GTTTCATGA_R	G	C	.	.	NS=5;AF=0.033	GT	.	.	.	.	.	.	.	0	0	.	0	.	.	.	.	.	.	.	.	.	.	.	.	0	.	.	.	.	1	.
1	484421	AAAACCGAG.TGACCGCGC_F	C	T	.	.	NS=8;AF=0.033	GT	0	0	0	.	.	.	0	.	0	.	0	.	.	.	.	.	.	.	.	.	.	.	.	.	.	.	1	.	0	.
1	4640837	AAAACCGAG.TTGGCAAAG_F	C	T	.	.	NS=5;AF=0.033	GT	.	.	.	.	.	.	0	0	.	.	0	.	.	.	1	.	.	.	.	.	.	.	.	.	.	.	.	.	0	.
1	3848938	AAAACCGAT.ATTGCCGAC_F	T	C	.	.	NS=13;AF=0.167	GT	0	.	.	.	.	.	0	0	.	0	0	1	1	1	1	.	.	.	.	.	.	.	.	.	1	0	0	.	0	.
1	2880838	AAAACCGAT.CAGGCCAAA_R	C	T	.	.	NS=4;AF=0.033	GT	.	.	.	.	.	.	.	0	1	.	0	.	.	.	.	.	.	.	.	.	.	.	.	.	.	.	.	.	0	.
1	3307189	AAAACCGAT.CCGGCCTGC_F	C	T	.	.	NS=8;AF=0.167	GT	1	1	1	1	1	.	.	0	.	.	0	.	.	.	.	.	.	.	.	.	.	.	.	.	.	.	.	.	0	.
1	414460	AAAACCGAT.CGTATTGGC_R	A	G	.	.	NS=13;AF=0.033	GT	1	.	.	.	.	0	.	0	0	.	0	.	.	.	.	0	0	0	.	.	0	0	0	0	.	.	.	.	0	.
1	3837820	AAAACCGAT.CTGGAAAAA_F	A	C	.	.	NS=9;AF=0.033	GT	.	.	.	.	.	.	0	.	0	0	0	.	0	.	1	.	.	.	.	.	.	.	.	.	.	0	.	0	0	.
1	1888919	AAAACCGAT.GCCGCCATG_F	T	A	.	.	NS=22;AF=0.100	GT	1	1	1	.	.	0	.	0	0	.	0	0	0	0	0	0	0	0	0	0	0	0	0	0	0	.	.	.	0	.
1	3389952	AAAACCGAT.GCGCGCAGG_R	T	C	.	.	NS=6;AF=0.067	GT	.	.	.	1	1	.	.	0	.	0	0	.	.	.	.	.	.	.	.	.	.	.	.	.	.	.	.	.	0	.
1	3456431	AAAACCGAT.GTCGCCACG_R	A	G	.	.	NS=14;AF=0.133	GT	0	.	.	0	0	.	1	0	.	0	0	0	0	.	.	.	.	.	.	.	.	.	.	.	0	1	1	1	0	.
1	465529	AAAACCGAT.TAGCCGATT_F	G	A	.	.	NS=7;AF=0.133	GT	.	.	.	.	.	.	1	0	.	.	0	.	.	.	.	.	.	.	.	.	.	.	.	.	.	1	1	1	0	.
1	4074361	AAAACCGAT.TCCATAATC_R	T	C	.	.	NS=19;AF=0.200	GT	.	.	.	0	0	.	.	0	.	.	0	0	0	0	0	0	1	1	1	1	0	0	1	1	0	.	.	.	0	.
1	1702690	AAAACCGAT.TTCAGCGCC_R	T	A	.	.	NS=4;AF=0.033	GT	1	.	.	.	.	.	.	0	.	.	0	.	.	.	.	.	.	.	.	.	.	.	.	.	.	.	.	.	0	.
1	4325727	AAAACCGCA.CCGGAACCG_R	G	A	.	.	NS=4;AF=0.100	GT	.	.	.	.	.	1	.	1	.	.	0	.	.	.	.	.	.	.	.	.	.	.	.	.	.	.	.	.	1	.
1	958677	AAAACCGCA.GCGCTGGAT_F	A	G	.	.	NS=13;AF=0.033	GT	0	0	0	.	.	.	0	0	1	0	0	0	0	0	0	.	.	.	.	.	.	.	.	.	0	.	.	.	.	.
1	4330032	AAAACCGCA.GGTCGCGAT_R	G	A	.	.	NS=29;AF=0.633	GT	0	0	0	0	0	.	0	0	1	0	0	1	1	1	1	1	1	1	1	1	1	1	1	1	1	1	1	1	0	1
1	1338796	AAAACCGCC.ACAGCAATG_F	A	T	.	.	NS=22;AF=0.333	GT	.	0	0	0	0	0	0	0	0	.	0	1	.	.	.	1	1	1	1	1	1	1	1	1	.	0	.	0	0	.
1	4602313	AAAACCGCC.ACAGCAATG_F	A	T	.	.	NS=22;AF=0.333	GT	.	0	0	0	0	0	0	0	0	.	0	1	.	.	.	1	1	1	1	1	1	1	1	1	.	0	.	0	0	.
1	2366130	AAAACCGCC.CCGAACATG_R	C	T	.	.	NS=14;AF=0.200	GT	.	.	.	0	0	.	.	0	1	.	0	1	1	1	1	.	.	.	.	.	.	.	.	.	1	0	0	0	0	.
1	3742446	AAAACCGCC.GAGAAGGTT_F	G	T	.	.	NS=21;AF=0.333	GT	0	0	0	.	.	.	.	0	0	.	0	1	0	0	0	1	1	1	1	1	1	1	1	1	0	.	.	.	0	.
1	194527	AAAACCGCC.GGATTTTCC_R	G	C	.	.	NS=6;AF=0.033	GT	.	.	.	.	.	.	1	0	.	.	0	.	.	.	.	.	.	.	.	.	.	.	.	.	.	0	.	0	0	.
1	4193646	AAAACCGCC.GTCATGCCT_R	G	A	.	.	NS=23;AF=0.033	GT	.	.	.	.	.	.	0	0	1	0	0	0	0	0	0	0	0	0	0	0	0	0	0	0	0	0	0	0	0	.
1	4077858	AAAACCGCC.TACGGCGTG_F	G	A	.	.	NS=8;AF=0.033	GT	1	.	0	.	.	.	.	0	.	.	0	.	.	.	.	.	.	.	.	.	.	.	.	.	.	0	0	0	0	.
1	2327343	AAAACCGCC.TATGGGGAT_R	A	T	.	.	NS=3;AF=0.033	GT	.	1	.	.	.	.	.	.	.	.	0	.	.	.	.	.	.	.	.	.	.	.	.	.	.	0	.	.	.	.
1	1545253	AAAACCGCC.TCTATGTAT_F	A	T	.	.	NS=30;AF=0.033	GT	0	0	0	0	0	0	0	0	0	0	0	0	0	0	0	0	0	1	0	0	0	0	0	0	0	0	0	0	0	0
1	1948064	AAAACCGCG.ACCGTGGTG_R	G	A,C	.	.	NS=17;AF=0.433,0.033	GT	2	.	.	1	1	.	1	0	1	1	0	1	1	1	1	.	.	.	.	.	.	.	.	.	1	1	1	1	0	.
1	2233959	AAAACCGCG.CCCTGCTCG_R	G	A,C	.	.	NS=6;AF=0.067,0.067	GT	.	.	.	.	.	2	.	0	.	2	0	.	.	.	.	.	.	.	.	.	.	.	.	.	.	.	.	.	1	1
1	1839760	AAAACCGCG.CCCTGTTCG_F	T	C	.	.	NS=13;AF=0.300	GT	.	.	.	.	.	.	.	0	0	.	0	.	.	.	.	1	1	1	1	1	1	1	1	1	.	.	.	.	0	.
1	3148584	AAAACCGCG.CCGGTGATG_R	G	A	.	.	NS=13;AF=0.100	GT	0	0	0	1	1	.	0	0	.	1	0	.	.	.	.	.	.	.	.	.	.	.	.	.	.	0	0	0	0	.
1	1381226	AAAACCGCG.CGCCCCATC_R	A	G	.	.	NS=19;AF=0.233	GT	0	.	.	0	0	0	.	0	.	.	0	0	0	0	0	1	1	1	1	1	.	.	1	1	0	.	.	.	0	.
1	15976	AAAACCGCG.CGTATCGAA_F	T	C	.	.	NS=19;AF=0.433	GT	1	1	1	1	1	.	1	0	.	1	0	1	1	1	1	.	.	.	.	.	.	.	.	.	1	0	0	0	0	1
1	4171743	AAAACCGCG.GCGCGGCGC_R	A	G	.	.	NS=11;AF=0.067	GT	.	.	1	.	.	1	.	.	.	.	0	.	.	.	.	0	.	0	0	0	.	.	.	0	.	0	0	.	0	.
1	2492756	AAAACCGCG.GGCGGGATC_F	C	G	.	.	NS=17;AF=0.100	GT	1	1	1	.	.	.	0	.	.	.	0	.	.	.	.	0	0	0	0	0	0	0	0	0	.	.	0	0	0	.
1	339948	AAAACCGCG.TCCGTCACT_R	A	G	.	.	NS=10;AF=0.067	GT	0	1	1	.	.	.	0	0	.	.	0	.	.	.	.	.	.	.	.	.	.	.	.	.	.	0	0	0	0	.
1	1179780	AAAACCGCG.TGGATGACG_R	T	G	.	.	NS=6;AF=0.067	GT	0	1	1	.	.	.	.	0	.	.	0	.	.	.	.	.	.	.	.	.	.	.	.	.	.	.	.	.	0	.
1	3491786	AAAACCGCG.TTAAACAGC_F	C	T	.	.	NS=17;AF=0.033	GT	.	.	.	0	0	0	.	0	.	0	0	.	.	.	.	0	0	0	0	0	0	0	0	0	.	.	.	.	0	1
1	1957565	AAAACCGCG.TTCTCTAAT_F	T	A	.	.	NS=11;AF=0.300	GT	.	.	.	.	.	.	.	.	.	0	0	.	.	.	.	1	1	1	1	1	1	1	1	1	.	.	.	.	.	.
1	4610997	AAAACCGCT.AACACCAGC_F	G	A	.	.	NS=4;AF=0.033	GT	.	.	.	.	.	.	.	0	1	.	0	.	.	.	.	.	.	.	.	.	.	.	.	.	.	.	.	.	0	.
1	2027750	AAAACCGCT.ACCGTGAAG_F	G	C	.	.	NS=14;AF=0.033	GT	0	.	.	0	0	.	.	0	.	0	0	0	0	0	0	.	.	.	.	.	.	.	.	.	0	.	.	0	0	1
1	2343795	AAAACCGCT.ACCTGAAGG_R	T	A	.	.	NS=18;AF=0.033	GT	0	0	0	0	0	.	0	1	.	0	0	0	0	0	0	.	.	.	.	.	.	.	.	.	0	0	0	0	0	.
1	18695	AAAACCGCT.ATGCTGGAG_R	C	G	.	.	NS=4;AF=0.033	GT	.	.	.	.	.	.	.	0	.	.	0	.	.	.	.	.	.	.	.	.	.	.	.	.	.	0	.	.	1	.
1	1931385	AAAACCGCT.CCTTCCGGC_R	A	C,T	.	.	NS=15;AF=0.367,0.033	GT	.	.	.	.	.	.	.	0	.	.	0	.	.	.	.	1	2	1	1	1	1	1	1	1	.	1	1	1	0	.
1	602039	AAAACCGCT.CGCGGCCCG_R	C	T	.	.	NS=14;AF=0.067	GT	0	.	.	0	0	.	0	0	.	0	0	0	1	1	0	.	.	.	.	.	.	.	.	.	.	0	0	.	0	.
1	1072734	AAAACCGCT.TAGACATGC_R	C	T	.	.	NS=9;AF=0.167	GT	.	.	.	.	.	.	.	0	0	.	0	1	1	1	1	.	.	.	.	.	.	.	.	.	1	.	.	.	0	.
1	1981126	AAAACCGCT.TTACTGCTG_F	T	G	.	.	NS=3;AF=0.067	GT	.	.	.	.	.	.	.	1	.	.	0	.	.	.	.	.	.	.	.	.	.	.	.	.	.	.	.	.	1	.
1	62863	AAAACCGGA.ATCGGCTGC_R	T	A	.	.	NS=4;AF=0.033	GT	.	.	.	.	.	.	1	0	.	.	0	.	.	.	.	.	.	.	.	.	.	.	.	.	.	.	.	.	0	.
1	1881735	AAAACCGGA.GAGAGCGGT_R	A	G	.	.	NS=7;AF=0.167	GT	.	.	.	.	.	.	.	.	.	.	0	1	1	1	1	.	.	.	.	.	.	.	.	.	1	.	.	.	0	.
1	2999142	AAAACCGGA.GCGTCGAAC_R	G	C,T	.	.	NS=8;AF=0.100,0.033	GT	0	.	.	.	.	.	2	0	.	.	0	.	.	.	.	.	.	.	.	.	.	.	.	.	.	1	1	1	0	.
1	2885887	AAAACCGGA.GTGGTGTTC_F	T	C	.	.	NS=12;AF=0.300	GT	.	.	.	1	1	1	.	0	1	1	0	1	.	1	1	.	.	.	.	.	.	.	.	.	1	.	.	.	0	.
1	2793779	AAAACCGGA.GTGTGGGAA_R	C	G,T	.	.	NS=9;AF=0.067,0.133	GT	2	2	2	.	.	.	.	0	2	.	0	.	.	.	.	.	.	.	1	1	.	.	.	.	.	.	.	.	0	.
1	2267949	AAAACCGGC.AAAATCGCT_F	A	G	.	.	NS=3;AF=0.067	GT	.	.	.	.	.	.	.	1	.	.	0	.	.	.	.	.	.	.	.	.	.	.	.	.	.	.	.	.	1	.
1	2304332	AAAACCGGC.AACAGGAGT_R	T	C	.	.	NS=3;AF=0.033	GT	.	.	.	.	.	.	.	.	1	.	0	.	.	.	.	.	.	.	.	.	.	.	.	.	.	.	.	.	0	.
1	4373135	AAAACCGGC.AACCCGCCA_R	C	A	.	.	NS=17;AF=0.033	GT	.	0	1	0	0	.	0	0	.	0	0	0	0	0	0	.	.	.	.	.	.	.	.	.	0	0	0	0	0	.
1	2467762	AAAACCGGC.ACAAACGGC_F	A	G	.	.	NS=16;AF=0.433	GT	1	1	1	1	1	.	1	0	.	.	0	1	1	1	1	.	.	.	.	.	.	.	.	.	1	.	1	1	0	.
1	2595140	AAAACCGGC.ACCAGGTCG_R	C	G,T	.	.	NS=8;AF=0.033,0.067	GT	.	2	2	0	0	1	.	.	.	0	0	.	.	.	.	.	.	.	.	.	.	.	.	.	.	.	.	.	0	.
1	807498	AAAACCGGC.ACCTATCTC_F	G	A	.	.	NS=11;AF=0.033	GT	.	.	.	.	.	0	.	0	.	.	0	0	0	0	0	.	.	.	.	.	.	.	.	.	.	1	.	0	0	0
1	1280322	AAAACCGGC.CATGAGGCC_F	T	A	.	.	NS=13;AF=0.033	GT	.	.	0	0	0	0	1	0	0	0	0	.	.	.	.	.	.	.	.	.	.	.	.	.	.	0	0	0	0	.
1	2366028	AAAACCGGC.CCCATATCC_R	G	A,C,T	.	.	NS=23;AF=0.067,0.300,0.100	GT	3	3	3	2	.	.	.	0	1	.	0	2	2	2	2	0	1	0	0	0	.	.	0	0	2	2	2	2	0	.
1	774424	AAAACCGGC.CCGGCGAAA_R	T	A,C,G	.	.	NS=13;AF=0.033,0.033,0.267	GT	.	.	.	.	.	.	2	0	.	.	0	.	.	.	.	3	3	.	3	3	3	3	3	3	.	.	.	.	0	1
1	2542997	AAAACCGGC.CCGTGAGGT_R	A	C	.	.	NS=3;AF=0.033	GT	.	.	.	.	.	.	1	0	.	.	0	.	.	.	.	.	.	.	.	.	.	.	.	.	.	.	.	.	.	.
1	4617429	AAAACCGGC.CGTAAGCTG_F	C	G	.	.	NS=6;AF=0.100	GT	.	1	1	.	.	.	.	0	.	1	0	.	.	.	.	.	.	.	.	.	.	.	.	.	.	.	.	.	0	.
1	2729321	AAAACCGGC.GAGTACCAT_R	C	G	.	.	NS=4;AF=0.033	GT	.	.	.	.	.	.	.	0	.	.	0	.	.	.	.	.	.	.	.	.	.	.	.	.	.	.	1	.	0	.
1	33009	AAAACCGGC.GCAATCTGC_R	C	A,T	.	.	NS=20;AF=0.033,0.133	GT	.	.	0	.	.	.	0	0	.	.	0	2	0	2	2	0	0	0	0	0	0	0	0	0	2	.	.	.	0	1
1	736793	AAAACCGGC.GCCACAAAG_R	C	A,G,T	.	.	NS=9;AF=0.033,0.100,0.033	GT	3	0	0	.	.	.	.	.	.	.	0	1	2	2	2	.	.	.	.	.	.	.	.	.	.	.	.	.	0	.
1	3388366	AAAACCGGC.GGCAGCTGT_R	T	C	.	.	NS=11;AF=0.267	GT	.	.	.	.	.	.	.	0	.	.	0	1	1	1	1	.	.	.	.	.	.	.	.	.	1	1	1	1	0	.
1	3458548	AAAACCGGC.GTATGATTG_F	G	T	.	.	NS=9;AF=0.033	GT	1	0	0	.	.	.	0	0	.	.	0	0	0	.	.	.	.	.	.	.	.	.	.	.	0	.	.	.	.	.
1	941183	AAAACCGGC.GTGCTGTCC_R	G	A	.	.	NS=13;AF=0.033	GT	0	0	.	1	0	.	.	0	.	0	0	0	0	0	0	.	.	.	.	.	.	.	.	.	0	.	.	.	0	.
1	3187082	AAAACCGGC.TCAGGGCCG_R	A	G	.	.	NS=5;AF=0.067	GT	.	.	.	.	.	.	.	0	.	.	0	.	.	.	.	.	.	.	.	.	.	.	.	.	.	1	.	1	0	.
1	1609494	AAAACCGGC.TGCGGTACG_F	A	G	.	.	NS=8;AF=0.200	GT	1	1	1	.	.	.	.	.	.	.	0	.	.	.	.	.	.	.	.	.	.	.	.	.	.	1	1	1	0	.
1	213262	AAAACCGGC.TTAAGCCGG_F	G	A	.	.	NS=10;AF=0.033	GT	.	0	0	.	.	.	.	.	1	.	0	0	0	0	0	0	.	.	.	.	.	.	.	.	0	.	.	.	.	.
1	2241971	AAAACCGGG.AAGAAAAAC_R	C	T	.	.	NS=2;AF=0.033	GT	.	.	.	.	.	.	.	.	.	.	0	.	.	.	.	.	.	.	.	.	.	.	.	.	.	.	.	.	1	.
1	4192293	AAAACCGGG.GAAGGCGGT_F	T	C	.	.	NS=6;AF=0.133	GT	.	.	.	0	1	.	.	1	.	.	0	.	.	.	.	.	.	.	.	.	.	.	.	.	.	.	.	.	1	1
1	803577	AAAACCGGG.GAGACGGTG_F	G	C	.	.	NS=4;AF=0.067	GT	.	.	.	.	.	.	.	0	1	.	0	.	.	.	.	.	.	.	.	.	.	.	.	.	.	.	.	.	1	.
1	2079817	AAAACCGGG.GCGGCAAAC_F	G	A	.	.	NS=5;AF=0.067	GT	1	.	.	.	.	.	.	0	.	.	0	.	.	.	.	.	.	.	.	.	.	.	.	.	.	1	.	.	0	.
1	1787841	AAAACCGGG.GCGGTCACC_R	A	C,G	.	.	NS=11;AF=0.167,0.167	GT	2	2	2	.	.	.	2	.	.	.	0	1	1	1	1	.	.	.	.	.	.	.	.	.	1	.	.	.	2	.
1	2148545	AAAACCGGG.GTAAAGCCC_R	G	C	.	.	NS=7;AF=0.033	GT	.	0	0	.	.	.	.	0	.	.	0	.	.	.	.	.	.	.	.	.	.	.	.	.	.	0	1	.	0	.
1	2150202	AAAACCGGG.GTAAAGCCC_R	G	C	.	.	NS=7;AF=0.033	GT	.	0	0	.	.	.	.	0	.	.	0	.	.	.	.	.	.	.	.	.	.	.	.	.	.	0	1	.	0	.
1	822360	AAAACCGGG.TATTACCTT_F	T	C	.	.	NS=11;AF=0.300	GT	1	1	1	1	1	.	.	1	.	.	0	.	.	.	.	.	.	.	.	.	.	.	.	.	.	1	1	1	0	.
1	299752	AAAACCGGG.TGTTCTCCG_F	C	T	.	.	NS=16;AF=0.033	GT	0	0	0	.	.	.	1	0	.	0	0	0	0	0	0	.	.	.	.	.	.	.	.	.	0	0	0	0	0	.
1	4355827	AAAACCGGT.AACACCACC_R	A	G	.	.	NS=8;AF=0.100	GT	.	.	.	0	0	.	.	0	.	1	0	.	1	.	1	.	.	.	.	.	.	.	.	.	.	.	.	.	0	.
1	2812325	AAAACCGGT.AGCGCCCAG_R	G	A,C,T	.	.	NS=17;AF=0.067,0.267,0.133	GT	.	1	1	3	3	.	.	0	3	3	0	2	2	2	2	.	.	.	.	.	.	.	.	.	2	2	2	2	0	.
1	232491	AAAACCGGT.AGCGGGCTG_F	C	T	.	.	NS=27;AF=0.033	GT	0	0	0	.	0	0	0	0	.	1	0	0	0	0	0	0	0	0	0	0	0	0	0	0	0	0	0	0	0	.
1	883708	AAAACCGGT.ATAGGTGTT_F	G	A	.	.	NS=2;AF=0.033	GT	.	.	.	.	.	.	.	.	.	.	0	.	.	.	.	.	.	.	.	.	.	.	.	.	.	.	.	.	1	.
1	3511569	AAAACCGGT.ATCGCCAGA_R	T	C	.	.	NS=9;AF=0.200	GT	1	1	1	.	.	.	.	0	.	.	0	.	.	.	.	.	.	.	.	.	.	.	.	.	.	1	1	1	0	.
1	3190146	AAAACCGGT.ATGAGGTTG_R	C	T	.	.	NS=23;AF=0.300	GT	0	0	0	0	0	.	0	0	0	0	0	.	.	.	.	1	1	1	1	1	1	1	1	1	.	0	0	0	0	.
1	3986763	AAAACCGGT.CCGAAGGCG_F	T	C	.	.	NS=10;AF=0.233	GT	.	.	.	.	.	.	1	0	.	1	0	1	1	1	1	.	.	.	.	.	.	.	.	.	1	.	.	.	0	.
1	1012331	AAAACCGGT.CCGGAGATA_R	C	G,T	.	.	NS=27;AF=0.033,0.067	GT	0	0	0	0	0	1	0	0	2	0	0	0	0	0	.	0	0	0	0	0	0	0	0	0	0	2	.	0	0	.
1	3453034	AAAACCGGT.CGGCACTGC_F	G	T	.	.	NS=13;AF=0.033	GT	.	0	0	.	.	.	.	0	.	.	0	0	0	0	1	.	.	.	.	.	.	.	.	.	0	0	0	0	0	.
1	2948223	AAAACCGGT.CTGGGTCTG_R	C	T	.	.	NS=3;AF=0.033	GT	.	.	.	.	.	.	.	1	.	.	0	.	.	.	.	.	.	.	.	.	.	.	.	.	.	.	.	.	0	.
1	3795932	AAAACCGGT.CTGTCGTTT_F	G	A	.	.	NS=11;AF=0.033	GT	.	.	.	0	0	.	.	0	.	1	0	0	0	0	0	.	.	.	.	.	.	.	.	.	0	.	.	.	0	.
1	2157030	AAAACCGGT.GAGAGCGCC_R	C	T	.	.	NS=16;AF=0.033	GT	0	0	0	0	0	.	0	0	1	0	0	0	0	0	0	.	.	.	.	.	.	.	.	.	0	.	.	.	0	.
1	2827198	AAAACCGGT.GCCAGCACG_R	G	A	.	.	NS=17;AF=0.100	GT	1	1	1	.	.	0	0	0	0	.	0	0	0	0	0	.	.	.	.	.	.	.	.	.	0	0	0	0	0	.
1	475564	AAAACCGGT.GGCATGAAC_R	T	C	.	.	NS=8;AF=0.200	GT	.	.	.	.	.	.	.	0	.	.	0	.	.	.	.	1	.	.	.	.	1	1	1	1	.	.	.	.	1	.
1	2439577	AAAACCGGT.GTCAGGTAG_F	G	C,T	.	.	NS=12;AF=0.167,0.133	GT	.	.	.	2	2	.	2	0	.	2	0	1	1	1	1	.	.	.	.	.	.	.	.	.	1	.	.	.	0	.
1	3249333	AAAACCGGT.GTGGCGATG_R	C	G	.	.	NS=18;AF=0.033	GT	0	.	0	.	.	.	0	0	1	.	0	.	.	.	.	0	.	0	0	0	0	0	0	0	.	0	0	0	0	.
1	1554980	AAAACCGGT.GTTTATAAG_F	T	C	.	.	NS=6;AF=0.100	GT	.	.	.	.	.	.	.	0	.	.	0	.	.	.	.	.	.	.	.	.	.	.	.	.	.	1	1	1	0	.
1	2276756	AAAACCGGT.TCGTTGCGA_R	A	G	.	.	NS=12;AF=0.167	GT	.	0	0	.	.	.	.	0	0	.	0	1	1	1	1	.	.	.	.	.	.	.	.	.	1	0	.	.	0	.
1	3736888	AAAACCGGT.TGCTGGAAA_R	G	A	.	.	NS=25;AF=0.033	GT	0	0	0	0	0	0	.	0	1	0	0	0	0	0	0	0	0	0	0	0	0	0	0	.	0	.	0	.	0	.
1	3300185	AAAACCGGT.TGTCAGGAA_R	G	A	.	.	NS=30;AF=0.033	GT	0	0	0	0	0	0	0	0	0	0	0	0	0	0	0	0	0	0	0	0	0	0	0	0	0	0	0	0	0	1
1	1642346	AAAACCGGT.TTGCCACTG_R	T	A	.	.	NS=13;AF=0.067	GT	0	0	0	1	1	.	0	0	.	0	0	.	.	.	.	.	.	.	.	.	.	.	.	.	.	0	0	0	0	.
1	1318820	AAAACCGGT.TTTAACCGT_F	A	G	.	.	NS=24;AF=0.333	GT	0	.	.	0	0	0	0	0	1	.	0	0	0	.	.	1	1	1	1	1	1	1	1	1	0	0	0	0	0	.
1	1650436	AAAACCGTA.AAAGGACCG_F	G	A	.	.	NS=6;AF=0.033	GT	.	.	.	.	.	.	.	.	.	1	0	.	.	.	.	.	.	.	.	.	.	.	.	.	.	0	0	0	0	.
1	366256	AAAACCGTA.ACCATCGAC_R	C	G	.	.	NS=18;AF=0.200	GT	.	.	.	1	1	.	.	0	.	1	0	1	.	.	1	0	0	0	0	0	0	0	0	0	1	.	.	.	0	.
1	2125699	AAAACCGTA.CTGCGTCGC_F	A	G	.	.	NS=13;AF=0.100	GT	.	.	.	1	1	.	.	0	.	1	0	.	.	.	.	.	.	0	0	0	0	0	0	0	.	.	.	.	0	.
1	3554093	AAAACCGTA.GACTTCATC_R	T	A,C	.	.	NS=26;AF=0.067,0.167	GT	0	0	0	1	1	.	.	0	.	0	0	2	2	2	2	0	0	0	0	0	0	0	0	0	2	0	0	0	0	.
1	1851844	AAAACCGTA.GAGAAACTG_R	G	A	.	.	NS=14;AF=0.033	GT	.	.	.	.	.	1	.	0	0	.	0	.	.	.	.	0	0	0	0	0	0	0	0	0	.	.	.	.	0	.
1	3240027	AAAACCGTA.GCGATGGAG_F	G	A	.	.	NS=6;AF=0.033	GT	.	.	.	0	0	.	0	1	.	.	0	.	.	.	.	.	.	.	.	.	.	.	.	.	.	.	.	.	0	.
1	3983393	AAAACCGTA.TCGGTGGCT_R	A	G	.	.	NS=6;AF=0.100	GT	1	.	.	.	.	1	1	0	.	.	0	.	.	.	.	.	.	.	.	.	.	.	.	.	.	.	.	.	0	.
1	1160308	AAAACCGTC.ACCCACGAC_R	T	G	.	.	NS=14;AF=0.033	GT	0	0	1	.	.	.	.	0	.	.	0	0	0	0	0	.	.	.	.	.	.	.	.	.	0	0	0	0	0	.
1	4374727	AAAACCGTC.ACGTGGAAC_F	G	C	.	.	NS=24;AF=0.067	GT	0	0	0	1	1	.	0	0	.	.	0	0	0	0	0	0	0	0	0	0	.	.	0	0	0	0	0	0	0	.
1	2332428	AAAACCGTC.ATATGCATC_F	G	A	.	.	NS=5;AF=0.067	GT	1	1	.	.	.	.	.	0	.	.	0	.	.	.	.	.	.	.	.	.	.	.	.	.	.	.	.	.	0	.
1	3456281	AAAACCGTC.ATTTTGACG_F	G	A	.	.	NS=5;AF=0.033	GT	0	.	.	.	.	.	.	0	1	.	0	.	.	.	.	.	.	.	.	.	.	.	.	.	.	.	.	.	0	.
1	1883296	AAAACCGTC.CGGACCGCC_R	T	G	.	.	NS=9;AF=0.067	GT	0	0	0	.	.	.	.	0	.	.	0	.	.	.	.	.	.	.	.	.	.	.	.	.	.	1	0	1	0	.
1	1584933	AAAACCGTC.TCCAGTAAC_R	C	T	.	.	NS=30;AF=0.367	GT	0	0	0	0	0	1	1	0	0	0	0	0	0	0	0	1	1	1	1	1	1	1	1	1	0	0	0	0	0	0
1	2672490	AAAACCGTC.TCGTTCACG_R	A	G	.	.	NS=4;AF=0.033	GT	.	.	.	.	.	.	.	0	.	.	0	.	.	.	.	.	.	.	.	.	.	.	.	.	.	.	1	.	0	.
1	76973	AAAACCGTC.TTGCTGTCG_F	G	A	.	.	NS=13;AF=0.033	GT	.	0	0	.	.	.	0	.	1	.	0	0	.	0	0	.	.	.	.	.	.	.	.	.	0	0	0	0	0	.
1	1824284	AAAACCGTG.AAATAGATG_R	A	G	.	.	NS=30;AF=0.033	GT	0	0	0	0	0	0	0	0	0	0	0	0	0	0	0	0	0	0	0	0	0	0	0	0	0	0	0	0	0	1
1	4237833	AAAACCGTG.AATACGATC_F	A	G	.	.	NS=5;AF=0.067	GT	.	.	.	.	1	.	.	0	1	.	0	.	.	.	.	.	.	.	.	.	.	.	.	.	.	.	.	.	0	.
1	3788194	AAAACCGTG.ATGGTAAAG_F	A	G	.	.	NS=8;AF=0.033	GT	.	0	0	.	.	.	1	0	.	.	0	.	.	.	.	.	.	.	.	.	.	.	.	.	.	0	0	0	.	.
1	3918022	AAAACCGTG.CCCCCGGCG_F	C	T	.	.	NS=3;AF=0.033	GT	.	.	.	1	.	.	.	0	.	.	0	.	.	.	.	.	.	.	.	.	.	.	.	.	.	.	.	.	.	.
1	610967	AAAACCGTG.GATTTCAGG_F	G	A	.	.	NS=27;AF=0.033	GT	0	0	0	0	0	1	0	0	.	0	0	0	0	0	0	0	0	0	0	0	0	0	0	0	.	0	0	0	0	.
1	1534331	AAAACCGTG.GTCGCGTTG_F	C	G	.	.	NS=8;AF=0.067	GT	.	.	.	1	1	.	.	0	.	0	0	.	.	.	.	.	.	.	.	.	.	.	.	.	.	0	.	0	0	.
1	372662	AAAACCGTT.ACCATTTCA_F	C	G	.	.	NS=7;AF=0.033	GT	.	.	.	.	.	.	1	0	.	.	0	.	.	.	.	.	.	.	.	.	.	.	.	.	.	0	0	0	0	.
1	2060802	AAAACCGTT.ACGAAAGGC_R	A	C	.	.	NS=4;AF=0.033	GT	.	.	.	.	.	.	.	0	.	1	0	.	.	.	.	.	.	.	.	.	.	.	.	.	.	.	.	.	0	.
1	1479344	AAAACCGTT.ACGGCCTGG_F	C	A	.	.	NS=9;AF=0.267	GT	.	.	.	.	.	.	.	.	.	.	0	.	.	.	.	1	1	.	1	1	1	1	1	1	.	.	.	.	.	.
1	631373	AAAACCGTT.AGCGGCATA_R	G	C	.	.	NS=9;AF=0.167	GT	.	.	.	.	.	.	0	0	.	.	0	.	.	.	.	1	.	1	.	.	1	1	.	1	.	.	.	.	0	.
1	13417	AAAACCGTT.CCGAAGAAC_R	A	C,G,T	.	.	NS=13;AF=0.033,0.100,0.200	GT	.	.	.	.	.	.	.	0	1	.	0	.	.	.	.	2	3	3	2	2	3	3	3	3	.	.	.	.	0	.
1	2798348	AAAACCGTT.GGGGTGTGA_F	T	C	.	.	NS=9;AF=0.100	GT	1	1	1	0	0	.	.	0	.	0	0	.	.	.	.	.	.	.	.	.	.	.	.	.	.	.	.	.	0	.
1	3977556	AAAACCGTT.GTCGGTAAT_R	G	A	.	.	NS=13;AF=0.300	GT	.	.	.	.	.	.	.	0	0	.	0	.	.	.	.	1	1	1	1	1	1	1	1	1	.	.	.	.	0	.
1	480637	AAAACCGTT.TACTATGCC_R	A	G	.	.	NS=4;AF=0.100	GT	.	.	.	.	.	.	.	1	1	.	0	.	.	.	.	.	.	.	.	.	.	.	.	.	.	.	.	.	1	.
1	3134216	AAAACCGTT.TCTTTCAGA_R	G	A	.	.	NS=14;AF=0.033	GT	1	.	.	.	.	.	.	0	0	0	0	0	0	0	0	.	.	.	.	.	.	.	.	.	.	0	0	0	0	0
1	1823912	AAAACCGTT.TGCGCCAGG_F	T	C	.	.	NS=8;AF=0.167	GT	.	1	1	1	1	.	.	0	.	1	0	.	.	.	.	.	.	.	.	.	.	.	.	.	.	.	.	.	0	.
1	840850	AAAACCGTT.TTATCGCTG_R	C	T	.	.	NS=3;AF=0.033	GT	.	.	.	.	.	.	.	.	.	.	0	.	.	.	.	.	.	.	.	.	.	.	.	.	.	.	.	1	0	.
1	1450534	AAAACCTAC.ACGGCTAAC_F	T	G	.	.	NS=29;AF=0.033	GT	0	0	0	0	0	1	0	0	0	0	0	0	0	0	0	0	0	0	0	0	0	0	0	0	0	0	0	0	0	.
1	4585755	AAAACCTAC.CCGCTGAGA_R	T	C	.	.	NS=8;AF=0.167	GT	.	.	.	.	.	.	.	0	.	.	0	1	1	1	1	.	.	.	.	.	.	.	.	.	1	.	.	.	0	.
1	2648889	AAAACCTAC.CTGGTGGTG_R	A	C	.	.	NS=29;AF=0.333	GT	0	0	0	0	0	1	0	0	0	0	0	0	0	0	0	1	1	1	1	1	1	1	1	1	0	0	0	0	0	.
1	3470654	AAAACCTCA.CGGTGACCA_R	T	G	.	.	NS=4;AF=0.033	GT	.	.	.	.	.	0	.	1	.	.	0	.	.	.	.	.	.	.	.	.	.	.	.	.	.	.	.	.	0	.
1	952717	AAAACCTCC.CCAAAGGCA_R	C	G	.	.	NS=10;AF=0.133	GT	.	.	.	0	0	.	.	0	.	.	0	1	1	.	1	.	.	.	.	.	.	.	.	.	1	.	.	0	0	.
1	4338837	AAAACCTCG.TGCGAGAGA_F	C	T	.	.	NS=4;AF=0.067	GT	1	.	.	.	.	.	.	0	1	.	0	.	.	.	.	.	.	.	.	.	.	.	.	.	.	.	.	.	.	.
1	2885207	AAAACCTCT.TGCTAAGGA_F	T	A	.	.	NS=29;AF=0.033	GT	0	0	0	0	0	1	0	0	0	0	0	0	0	0	0	0	0	0	0	0	0	0	0	0	0	0	0	0	0	.
1	709088	AAAACCTGA.ATACCCGCT_R	T	G	.	.	NS=4;AF=0.033	GT	.	.	.	.	0	.	.	1	.	.	0	.	.	.	.	.	.	.	.	.	.	.	.	.	.	.	.	.	0	.
1	952995	AAAACCTGA.CGTGGTGCT_R	G	T	.	.	NS=14;AF=0.033	GT	.	0	0	.	.	1	0	0	.	0	0	0	0	0	0	.	.	.	.	.	.	.	.	.	0	.	.	0	0	.
1	4240286	AAAACCTGC.ACCAGCAGG_R	C	A	.	.	NS=4;AF=0.033	GT	.	.	.	.	.	.	.	0	0	.	0	.	.	.	.	.	.	.	.	.	.	.	.	.	.	.	.	.	1	.
1	2881344	AAAACCTGC.GAAGCAGGT_F	C	T	.	.	NS=9;AF=0.033	GT	.	1	.	.	.	0	.	0	.	0	0	.	.	.	.	.	.	.	.	.	.	.	.	.	.	.	0	0	0	0
1	1320474	AAAACCTGC.GATATGGCC_F	C	A	.	.	NS=6;AF=0.033	GT	0	.	0	.	.	.	.	0	1	.	0	.	.	.	.	.	.	.	.	.	.	.	.	.	.	.	.	.	0	.
1	3666533	AAAACCTGC.GATTCAGAA_F	T	A	.	.	NS=20;AF=0.167	GT	0	0	0	.	.	.	.	0	.	.	0	1	1	1	1	0	0	0	0	0	0	0	0	0	1	.	.	.	0	.
1	229595	AAAACCTGC.GGTCACGTT_R	C	T	.	.	NS=10;AF=0.233	GT	.	.	.	.	.	.	.	0	.	.	0	.	.	.	.	1	1	1	1	1	1	1	.	.	.	.	.	.	0	.
1	2627629	AAAACCTGG.ACCCGTCCT_F	C	T	.	.	NS=15;AF=0.033	GT	.	.	.	0	0	.	0	0	.	0	0	1	.	.	.	.	.	0	0	0	0	0	0	0	.	.	.	.	0	.
1	4215916	AAAACCTGG.CATTGAGCT_R	T	G	.	.	NS=5;AF=0.067	GT	.	.	.	.	.	.	.	0	.	.	0	1	.	1	.	.	.	.	.	.	.	.	.	.	.	.	.	.	0	.
1	10961	AAAACCTGG.GCAGTGGAT_F	T	C	.	.	NS=14;AF=0.367	GT	.	.	.	.	.	1	.	0	1	.	0	.	.	.	.	1	1	1	1	1	1	1	1	1	.	.	.	.	0	.
1	1226006	AAAACCTGG.GCATCTGGA_F	G	A	.	.	NS=4;AF=0.033	GT	.	.	.	.	.	.	.	0	.	.	0	.	.	.	.	.	.	.	.	.	.	.	.	.	.	.	.	.	0	1
1	3331242	AAAACCTGG.GCGTATTGA_R	G	C	.	.	NS=18;AF=0.100	GT	0	0	0	1	1	.	.	0	.	1	0	.	.	.	.	0	0	0	0	0	0	0	0	0	.	.	.	.	0	.
1	1780469	AAAACCTGG.TCGATCTTG_R	T	C	.	.	NS=9;AF=0.067	GT	0	.	0	1	1	.	0	0	.	0	0	.	.	.	.	.	.	.	.	.	.	.	.	.	.	.	.	.	0	.
1	323030	AAAACCTGG.TCTATAACT_F	G	A,C	.	.	NS=17;AF=0.167,0.067	GT	0	0	0	2	.	0	2	0	.	.	0	1	1	1	1	.	.	.	.	.	.	.	.	.	1	0	0	0	0	.
1	4525437	AAAACCTGG.TGCTCTCGC_F	T	C	.	.	NS=20;AF=0.567	GT	1	1	1	1	.	.	1	0	.	1	0	.	.	.	.	1	.	1	1	1	1	1	1	1	.	1	1	1	0	.
1	1649737	AAAACCTGT.TAATCATCA_R	C	A	.	.	NS=26;AF=0.567	GT	0	0	0	1	1	.	.	0	.	1	0	1	1	1	1	1	1	1	1	1	1	1	1	1	1	0	0	0	0	.
1	2857893	AAAACCTTA.CGATGTGAA_R	T	C	.	.	NS=6;AF=0.100	GT	.	.	.	.	.	.	.	0	.	.	0	.	.	.	.	.	.	.	.	.	.	.	.	.	.	1	1	1	0	.
1	1590439	AAAACCTTC.AACAGCGCC_R	T	C	.	.	NS=6;AF=0.100	GT	.	.	.	.	.	.	.	0	.	.	0	.	.	.	.	.	.	.	.	.	.	.	.	.	.	1	1	1	0	.
1	2793392	AAAACCTTC.ATCACCATT_R	T	A	.	.	NS=16;AF=0.067	GT	0	1	1	.	.	.	.	0	.	0	0	.	.	.	.	0	0	0	0	0	0	0	0	0	.	.	.	.	0	.
1	2113793	AAAACCTTC.CCGAGAGTG_R	C	G	.	.	NS=3;AF=0.033	GT	.	.	.	.	.	.	1	.	.	.	0	.	.	.	.	.	.	.	.	.	.	.	.	.	.	.	.	.	0	.
1	2757816	AAAACCTTC.GAATAGCTG_F	G	C,T	.	.	NS=10;AF=0.033,0.133	GT	2	2	2	.	.	.	1	0	.	2	0	.	.	.	.	.	.	.	.	.	.	.	.	.	.	0	0	0	.	.
1	2834234	AAAACCTTC.GCATCAACG_F	A	G	.	.	NS=5;AF=0.067	GT	.	.	.	.	.	.	.	0	.	.	0	.	.	.	.	.	.	.	.	.	.	.	.	.	.	1	.	1	0	.
1	2185671	AAAACCTTC.GCATGCAGG_F	G	T	.	.	NS=11;AF=0.200	GT	.	0	0	.	.	.	.	0	1	.	0	1	1	1	1	.	.	.	.	.	.	.	.	.	1	.	.	.	0	.
1	1765093	AAAACCTTC.TTGCAAGCG_R	A	C	.	.	NS=19;AF=0.300	GT	0	0	0	.	.	.	0	0	0	.	0	.	.	.	.	1	1	1	1	1	1	1	1	1	.	0	0	0	.	.
1	1494701	AAAACCTTG.GAAGCTGAA_F	C	A	.	.	NS=26;AF=0.733	GT	1	1	1	1	1	1	0	0	.	1	0	1	1	1	1	1	1	1	1	1	1	1	1	1	1	.	1	.	0	.
1	2800704	AAAACCTTG.GCAATGCGC_R	G	A	.	.	NS=3;AF=0.033	GT	.	.	.	.	.	.	.	1	.	.	0	.	.	.	.	.	.	.	.	.	.	.	.	.	.	.	.	.	0	.
1	4684825	AAAACCTTT.ATTGACATT_R	A	G	.	.	NS=25;AF=0.033	GT	.	.	.	0	0	0	0	0	1	0	0	0	0	0	0	0	0	0	0	0	0	0	0	0	.	0	0	0	0	.
1	2755598	AAAACCTTT.CCGACGCGG_F	G	A	.	.	NS=6;AF=0.100	GT	1	1	1	.	.	.	.	0	.	.	0	.	.	.	.	.	.	.	.	.	.	.	.	.	.	.	.	.	0	.
1	3069256	AAAACGAAA.CCTTATATA_R	T	C	.	.	NS=28;AF=0.133	GT	0	0	0	0	0	.	0	0	.	0	0	0	0	0	0	0	0	0	0	0	0	0	0	0	0	1	1	1	0	1
1	2233244	AAAACGAAA.GGCGCGTCC_F	C	A	.	.	NS=8;AF=0.033	GT	1	0	.	.	.	.	.	0	.	.	0	.	.	.	.	.	.	.	.	.	.	.	.	.	.	0	0	0	0	.
1	2889317	AAAACGAAT.ATGCTGCTC_R	T	A,C	.	.	NS=8;AF=0.033,0.100	GT	.	.	.	.	.	.	.	0	.	0	0	2	.	0	2	.	.	.	.	.	.	.	.	.	2	.	.	.	1	.
1	1578683	AAAACGAAT.TCGCCCTGC_R	T	C	.	.	NS=7;AF=0.033	GT	.	.	.	0	0	0	1	0	.	0	0	.	.	.	.	.	.	.	.	.	.	.	.	.	.	.	.	.	.	.
1	2424019	AAAACGAAT.TTACGCATC_F	T	A	.	.	NS=3;AF=0.067	GT	.	.	.	.	.	.	.	1	.	.	0	.	.	.	.	.	.	.	.	.	.	.	.	.	.	.	.	.	1	.
1	1660317	AAAACGACA.GCCAACGAC_F	G	C	.	.	NS=3;AF=0.033	GT	.	.	.	.	.	1	.	.	.	.	0	.	.	.	.	.	.	.	.	.	.	.	.	.	.	.	.	.	0	.
1	874282	AAAACGACA.GGCGTGAAC_R	G	A	.	.	NS=13;AF=0.167	GT	.	0	0	.	0	.	0	0	0	.	0	1	1	1	1	.	.	.	.	.	.	.	.	.	1	.	.	.	0	.
1	1039118	AAAACGACC.CGCTGCGCC_R	T	C	.	.	NS=21;AF=0.667	GT	1	1	.	1	1	.	.	1	1	1	0	.	.	.	.	1	1	1	1	1	1	1	1	1	.	1	1	1	1	.
1	3823331	AAAACGACC.GAGTCGATC_F	A	G	.	.	NS=3;AF=0.067	GT	.	.	.	.	.	.	.	1	.	.	0	.	.	.	.	.	.	.	.	.	.	.	.	.	.	.	.	.	1	.
1	432358	AAAACGACG.AAAATATTA_R	G	A	.	.	NS=11;AF=0.100	GT	0	0	0	.	.	.	0	0	0	.	0	.	.	.	.	.	.	.	.	.	.	.	.	.	.	1	1	1	0	.
1	2833765	AAAACGACG.GCCGTGGCG_R	G	A	.	.	NS=4;AF=0.033	GT	0	.	.	.	.	.	.	0	.	.	0	.	.	.	.	.	.	.	.	.	.	.	.	.	.	.	.	.	1	.
1	2137865	AAAACGACG.TCACTCTGA_F	C	T	.	.	NS=8;AF=0.167	GT	1	1	1	.	.	.	.	0	.	.	0	.	.	.	.	.	.	.	.	.	.	.	.	.	.	1	1	.	0	.
1	450008	AAAACGACG.TGGGCGCTG_R	C	T	.	.	NS=12;AF=0.167	GT	.	.	.	.	.	.	.	0	.	.	0	.	.	.	.	1	1	0	1	1	0	0	0	1	.	.	.	.	0	.
1	2631649	AAAACGACG.TGGTGAGCA_F	C	T	.	.	NS=8;AF=0.133	GT	.	.	.	.	.	.	.	0	.	.	0	.	.	.	.	.	.	1	1	1	.	.	.	1	.	.	.	.	0	0
1	4029997	AAAACGACT.AACCGCGCA_R	T	G	.	.	NS=6;AF=0.167	GT	.	.	.	1	.	.	.	.	.	.	0	1	0	.	.	.	.	.	.	.	.	.	.	.	1	1	.	.	.	.
1	2321484	AAAACGACT.AGCATCAGT_R	G	A,T	.	.	NS=11;AF=0.167,0.100	GT	.	2	2	.	2	.	.	0	1	.	0	1	.	1	1	.	.	.	.	.	.	.	.	.	1	.	.	.	0	.
1	1446998	AAAACGACT.TATGGCCTT_F	T	A	.	.	NS=23;AF=0.433	GT	.	1	1	0	0	.	1	0	.	0	0	0	0	0	1	1	1	1	1	1	1	1	1	1	0	.	.	.	0	.
1	4603394	AAAACGAGA.ATATCGAAA_R	T	C	.	.	NS=30;AF=0.033	GT	0	0	0	0	0	0	0	0	0	0	0	0	0	0	1	0	0	0	0	0	0	0	0	0	0	0	0	0	0	0
1	1285086	AAAACGAGC.GAAAAAGTG_F	A	G	.	.	NS=29;AF=0.033	GT	0	0	0	0	0	0	0	0	1	0	0	0	0	0	0	0	0	0	0	0	0	0	0	0	0	0	0	0	0	.
1	4032802	AAAACGAGG.AAGCATGAC_F	C	T	.	.	NS=6;AF=0.033	GT	.	.	.	.	.	.	.	.	.	.	0	0	0	.	.	.	.	1	.	.	.	.	.	.	0	0	.	.	.	.
1	3906457	AAAACGAGG.ATCTTCACG_F	C	G	.	.	NS=8;AF=0.167	GT	.	.	.	.	.	.	.	0	.	.	0	1	1	1	1	.	.	.	.	.	.	.	.	.	1	.	.	.	0	.
1	2547265	AAAACGATA.CGTAATTCA_F	A	G	.	.	NS=5;AF=0.100	GT	.	.	.	.	.	.	.	.	.	.	0	.	.	.	.	.	.	.	.	.	.	.	.	.	.	1	1	1	0	.
1	4657349	AAAACGATA.GACGCCGTT_F	A	T	.	.	NS=10;AF=0.033	GT	1	0	0	.	.	.	0	0	.	.	0	.	.	.	.	.	.	.	.	.	.	.	.	.	.	0	0	0	0	.
1	1832998	AAAACGATC.AGGATAATA_R	C	T	.	.	NS=30;AF=0.033	GT	0	0	0	0	0	0	0	0	0	0	0	0	0	0	0	0	0	0	0	0	0	0	0	0	0	0	0	0	0	1
1	1031628	AAAACGATC.CGGCTACGC_R	C	T	.	.	NS=4;AF=0.067	GT	.	1	1	.	.	.	.	.	.	.	0	.	.	.	.	.	.	.	.	.	.	.	.	.	.	.	.	.	0	.
1	4119725	AAAACGATT.ATCATGCTG_R	C	T	.	.	NS=22;AF=0.167	GT	.	.	.	.	.	0	.	0	0	.	0	1	1	1	1	0	0	0	0	0	0	0	0	0	1	0	0	0	0	.
1	4218567	AAAACGCAA.CAGACCCGC_R	G	A	.	.	NS=28;AF=0.033	GT	0	0	0	.	.	0	0	1	0	0	0	0	0	0	0	0	0	0	0	0	0	0	0	0	0	0	0	0	0	0
1	3866321	AAAACGCAA.CATCTGGCA_R	C	T	.	.	NS=3;AF=0.067	GT	.	.	.	.	.	.	.	1	.	.	0	.	.	.	.	.	.	.	.	.	.	.	.	.	.	.	.	.	1	.
1	1619494	AAAACGCAA.CGTTTACCT_R	A	T	.	.	NS=17;AF=0.167	GT	0	0	0	0	0	.	.	0	0	.	0	1	1	1	1	.	.	.	.	.	.	.	.	.	1	0	0	0	0	.
1	2613217	AAAACGCAA.GTGCTGCTC_R	G	A	.	.	NS=14;AF=0.167	GT	0	0	0	0	0	.	.	0	.	0	0	1	1	1	1	.	.	.	.	.	.	.	.	.	1	.	.	.	0	.
1	4634818	AAAACGCAA.TACGACAAA_F	A	G	.	.	NS=19;AF=0.367	GT	.	0	0	1	1	0	0	0	0	0	0	1	1	1	1	.	.	.	.	.	.	.	.	.	1	1	1	1	.	1
1	856175	AAAACGCAA.TGGATAGCC_R	T	C	.	.	NS=13;AF=0.033	GT	0	0	0	0	0	.	0	0	1	0	0	.	.	.	.	.	.	.	.	.	.	.	.	.	.	0	0	.	0	.
1	4506995	AAAACGCAC.AAGCGTACC_F	A	G	.	.	NS=4;AF=0.033	GT	.	.	.	.	.	1	.	0	.	.	0	.	.	.	.	.	.	.	.	.	.	.	.	.	.	.	.	.	0	.
1	3703009	AAAACGCAC.ACCCTGCTG_F	C	G,T	.	.	NS=14;AF=0.167,0.100	GT	.	0	0	.	.	0	.	0	.	.	0	1	1	1	1	.	.	.	.	.	.	.	.	.	1	2	2	2	0	.
1	3346956	AAAACGCAC.ACGCAAGGC_F	C	A,G	.	.	NS=8;AF=0.100,0.033	GT	0	.	.	.	.	.	.	0	.	0	0	.	.	.	.	.	.	.	.	.	.	.	.	.	.	1	1	1	2	.
1	1897757	AAAACGCAC.ACGTTGGCA_R	G	C	.	.	NS=25;AF=0.100	GT	.	0	0	0	0	.	.	0	.	0	0	0	0	0	0	0	0	0	0	0	0	0	0	0	0	1	1	1	0	.
1	1645967	AAAACGCAC.ACTTCCCAG_F	C	G	.	.	NS=25;AF=0.167	GT	0	0	0	.	.	.	0	0	0	.	0	1	1	1	1	0	0	0	0	0	0	0	0	0	1	0	0	0	0	.
1	2172408	AAAACGCAC.CCCGACTTT_F	C	T	.	.	NS=17;AF=0.067	GT	.	0	0	0	0	.	0	0	.	0	0	0	0	0	0	.	.	.	.	.	.	.	.	.	0	1	0	1	0	.
1	4286805	AAAACGCAC.CCGTCCTTT_F	G	A	.	.	NS=3;AF=0.033	GT	.	.	.	.	.	.	.	1	.	.	0	.	.	.	.	.	.	.	.	.	.	.	.	.	.	.	.	.	0	.
1	1047250	AAAACGCAC.CGGTGGGAG_R	C	T	.	.	NS=20;AF=0.033	GT	.	.	.	.	0	.	.	0	.	0	0	0	0	0	0	0	0	1	0	0	0	0	0	0	0	.	0	.	0	.
1	1128285	AAAACGCAC.CTGGAAAAA_F	C	G	.	.	NS=15;AF=0.400	GT	1	1	1	1	1	1	.	0	.	1	0	1	1	1	1	.	.	.	.	.	.	.	.	.	1	.	.	.	0	.
1	4088288	AAAACGCAC.TCGCGCCCG_R	T	C	.	.	NS=3;AF=0.033	GT	.	1	.	.	.	.	.	.	.	.	0	.	.	.	.	.	.	.	.	.	.	.	.	.	.	.	.	.	0	.
1	3492379	AAAACGCAG.CCAAACTCC_R	G	C	.	.	NS=11;AF=0.200	GT	.	0	0	.	.	.	.	0	.	1	0	1	1	1	1	.	.	.	.	.	.	.	.	.	1	.	.	.	0	.
1	747415	AAAACGCAG.CCGTCTTCG_R	C	T	.	.	NS=22;AF=0.300	GT	.	.	.	0	0	0	0	0	.	0	0	0	0	0	0	1	1	1	1	1	1	1	1	1	.	.	.	.	0	0
1	3693326	AAAACGCAG.CGCGCCATG_F	G	A	.	.	NS=23;AF=0.433	GT	0	0	0	0	.	.	0	0	1	.	0	.	1	1	.	1	1	1	1	1	1	1	1	1	1	.	0	0	0	.
1	596718	AAAACGCAG.CGTTGTTCT_F	G	A	.	.	NS=13;AF=0.033	GT	.	.	.	.	.	.	.	0	1	.	0	.	.	.	.	0	0	0	0	0	0	0	0	0	.	.	.	.	0	.
1	1684286	AAAACGCAG.GTCTGCGCG_R	C	G	.	.	NS=4;AF=0.033	GT	.	.	.	.	.	.	.	0	.	.	0	.	.	.	.	.	.	.	.	.	.	.	.	.	.	1	.	.	0	.
1	4474342	AAAACGCAG.TAGTTTACC_F	G	A	.	.	NS=18;AF=0.033	GT	0	0	0	0	0	.	0	0	.	0	0	0	0	0	0	.	.	.	.	.	.	.	.	.	0	0	0	1	0	.
1	4055228	AAAACGCAG.TCATTACGA_F	C	G	.	.	NS=14;AF=0.367	GT	.	.	1	.	.	1	.	0	1	.	0	1	1	1	1	.	.	.	.	.	.	.	.	.	1	1	1	1	0	.
1	825616	AAAACGCAG.TGACCATTC_R	C	G	.	.	NS=7;AF=0.133	GT	1	.	.	.	.	.	.	0	.	.	0	.	.	.	.	.	.	.	.	.	.	.	.	.	.	1	1	1	0	.
1	4205391	AAAACGCAG.TGCCCTTCC_F	T	C	.	.	NS=7;AF=0.067	GT	.	.	.	.	.	.	.	0	0	.	0	.	.	.	.	.	.	.	.	.	.	.	.	.	.	1	0	1	0	.
1	2555141	AAAACGCAG.TTGGACAAG_F	T	C	.	.	NS=11;AF=0.167	GT	.	0	0	1	1	.	.	0	.	1	0	.	0	.	0	.	.	.	.	.	.	.	.	.	.	.	1	1	.	.
1	3818765	AAAACGCAT.ATCGCCGTG_R	T	A,G	.	.	NS=3;AF=0.033,0.033	GT	.	.	.	.	.	.	.	2	.	.	0	.	.	.	.	.	.	.	.	.	.	.	.	.	.	.	.	.	1	.
1	638117	AAAACGCAT.CGGTTAACT_R	T	C	.	.	NS=5;AF=0.067	GT	1	.	.	.	.	.	1	0	.	.	0	.	.	.	.	.	.	.	.	.	.	.	.	.	.	.	.	.	0	.
1	441378	AAAACGCAT.GAAGACATC_R	A	G	.	.	NS=11;AF=0.267	GT	1	1	1	.	.	.	1	0	1	.	0	.	.	.	.	.	.	.	.	.	.	.	.	.	.	1	1	1	0	.
1	3060517	AAAACGCAT.GAATTCGAC_R	A	G	.	.	NS=12;AF=0.300	GT	.	.	.	.	.	.	.	0	.	.	0	.	.	.	.	1	1	1	1	1	1	1	1	1	.	.	.	.	0	.
1	4658406	AAAACGCAT.GCACGTAAA_F	A	C,G	.	.	NS=21;AF=0.567,0.033	GT	1	1	1	1	1	1	1	0	1	1	0	1	1	1	1	.	.	.	.	.	.	.	.	.	1	1	1	1	0	2
1	4590715	AAAACGCAT.GGCCTGGTG_R	G	A	.	.	NS=14;AF=0.033	GT	.	.	.	.	0	1	0	.	0	.	0	0	0	0	0	.	.	.	.	.	.	.	.	.	0	0	0	0	0	.
1	697594	AAAACGCCA.ACCTGATCC_F	G	C	.	.	NS=9;AF=0.033	GT	.	.	.	.	.	1	.	0	0	.	0	0	0	0	0	.	.	.	.	.	.	.	.	.	.	.	.	.	0	.
1	2891397	AAAACGCCA.CACAAAGAA_F	G	A	.	.	NS=12;AF=0.033	GT	.	.	.	0	0	.	0	0	0	.	0	.	.	0	.	.	.	.	.	.	.	.	.	.	.	0	0	0	0	1
1	1654373	AAAACGCCA.CAGAGCGCG_R	C	A	.	.	NS=10;AF=0.033	GT	0	0	0	.	.	.	0	0	.	1	0	.	.	.	.	.	.	.	.	.	.	.	.	.	.	0	0	.	0	.
1	167243	AAAACGCCA.CGTCTATTT_R	G	C	.	.	NS=21;AF=0.033	GT	0	0	0	.	.	0	0	0	.	.	0	.	.	.	.	0	0	0	0	0	0	0	0	0	.	1	0	0	0	0
1	731640	AAAACGCCA.CTGATAAAG_R	T	A	.	.	NS=19;AF=0.033	GT	0	.	.	.	.	.	0	0	.	0	0	1	.	.	.	0	0	0	0	0	0	0	0	0	.	0	0	0	0	.
1	3306023	AAAACGCCA.CTGCGCCTG_F	G	A	.	.	NS=22;AF=0.033	GT	0	0	0	1	0	.	0	0	.	0	0	.	.	.	.	0	0	0	0	0	0	0	0	0	.	0	0	0	0	.
1	2468119	AAAACGCCA.GCGCAGGCT_R	A	G	.	.	NS=4;AF=0.067	GT	.	.	.	1	1	.	.	0	.	.	0	.	.	.	.	.	.	.	.	.	.	.	.	.	.	.	.	.	.	.
1	1785991	AAAACGCCA.TATCTGCGC_F	T	C	.	.	NS=9;AF=0.200	GT	.	.	.	.	.	.	1	0	.	.	0	1	1	1	1	.	.	.	.	.	.	.	.	.	1	.	.	.	0	.
1	1495952	AAAACGCCC.AAACTGCTG_F	G	T	.	.	NS=13;AF=0.033	GT	.	1	0	.	.	.	.	0	.	.	0	0	0	0	0	.	.	.	.	.	.	.	.	.	0	0	0	0	0	.
1	1560017	AAAACGCCC.AATCTGTTT_F	G	A	.	.	NS=18;AF=0.033	GT	.	.	.	.	.	.	1	0	.	.	0	0	0	0	0	0	0	0	0	0	0	0	0	0	0	.	.	.	0	.
1	1699384	AAAACGCCC.GGGCGCCCC_R	T	A	.	.	NS=3;AF=0.033	GT	.	.	.	.	.	.	.	1	.	.	0	.	.	.	.	.	.	.	.	.	.	.	.	.	.	.	.	.	0	.
1	2297246	AAAACGCCC.GTTACCGCA_R	C	A	.	.	NS=5;AF=0.067	GT	1	.	.	.	.	.	1	0	.	.	0	.	.	.	.	.	.	.	.	.	.	.	.	.	.	.	.	.	0	.
1	1095418	AAAACGCCC.TCAAACTGA_F	C	T	.	.	NS=17;AF=0.033	GT	.	.	.	.	.	.	.	0	0	1	0	.	.	.	.	0	0	0	0	0	0	0	0	0	.	0	0	0	0	.
1	2254003	AAAACGCCG.CAGCGACAG_R	T	G	.	.	NS=24;AF=0.367	GT	0	0	0	0	0	1	.	0	.	0	0	0	0	.	.	1	1	1	1	1	1	1	1	1	.	0	0	0	.	1
1	4123669	AAAACGCCG.GCCACATCG_R	G	C	.	.	NS=29;AF=0.033	GT	0	0	0	0	0	0	1	0	0	0	0	0	0	0	0	0	0	0	0	0	0	0	0	0	0	0	0	0	0	.
1	4705188	AAAACGCCG.TAGGGCTGC_R	A	G	.	.	NS=6;AF=0.033	GT	.	.	.	0	0	.	.	0	.	.	0	.	.	.	.	.	.	.	.	.	.	.	.	.	.	1	.	.	0	.
1	1784160	AAAACGCCG.TCGCTCCAG_F	T	C	.	.	NS=17;AF=0.167	GT	1	.	.	.	.	.	1	0	.	.	0	0	0	0	0	.	.	.	0	0	0	0	.	.	0	1	1	1	0	.
1	3924273	AAAACGCCG.TGCCGCCTT_F	C	A	.	.	NS=8;AF=0.167	GT	.	.	.	.	.	.	.	0	.	.	0	1	1	1	1	.	.	.	.	.	.	.	.	.	1	.	.	.	0	.
1	1319284	AAAACGCCT.AAACGGCGA_R	C	A	.	.	NS=7;AF=0.133	GT	.	.	.	1	1	.	.	0	1	1	0	.	.	.	.	.	.	.	.	.	.	.	.	.	.	.	.	.	0	.
1	3131514	AAAACGCCT.CAAATAAAA_F	T	G	.	.	NS=4;AF=0.033	GT	.	.	.	.	.	1	.	0	.	.	0	.	.	.	.	.	.	.	.	.	.	.	.	.	.	.	.	.	0	.
1	2382508	AAAACGCCT.CAGCTGACG_F	G	C	.	.	NS=4;AF=0.033	GT	.	.	.	.	.	.	1	0	.	.	0	.	.	.	.	.	.	.	.	.	.	.	.	.	.	.	.	.	0	.
1	3832415	AAAACGCCT.GAGTACATC_F	G	C	.	.	NS=21;AF=0.100	GT	0	0	0	0	0	.	1	0	0	.	0	.	.	.	.	0	0	.	0	0	0	0	0	0	.	1	0	1	0	.
1	1808489	AAAACGCCT.GATTACGAA_F	C	T	.	.	NS=27;AF=0.100	GT	0	.	0	1	1	.	0	0	1	0	0	0	0	0	0	0	0	0	0	0	0	0	0	0	0	0	0	.	0	0
1	2386091	AAAACGCCT.GGGTTTTTC_F	G	A	.	.	NS=4;AF=0.033	GT	.	.	.	.	.	.	.	0	0	.	0	.	.	.	.	.	.	.	.	.	.	.	.	.	.	.	.	.	1	.
1	4243948	AAAACGCCT.TATAACGAT_F	C	T	.	.	NS=21;AF=0.033	GT	0	0	0	.	.	1	0	0	0	.	0	.	.	.	.	0	0	0	0	0	0	0	0	0	.	0	0	0	0	.
1	2893221	AAAACGCCT.TCCAGCTAT_R	G	A	.	.	NS=13;AF=0.267	GT	.	0	0	.	.	.	1	0	.	.	0	1	1	1	1	.	.	.	.	.	.	.	.	.	1	.	1	1	0	.
1	1150901	AAAACGCGA.AAATCCGCC_R	G	A	.	.	NS=26;AF=0.300	GT	0	.	0	0	0	.	0	0	0	0	0	0	0	.	0	1	1	1	1	1	1	1	1	1	0	0	0	0	0	.
1	4067705	AAAACGCGA.ACCAGCGTG_F	A	G	.	.	NS=9;AF=0.100	GT	1	.	.	.	.	.	.	0	0	1	0	0	.	0	.	.	.	.	.	.	.	.	.	.	.	.	1	.	0	.
1	3655893	AAAACGCGA.AGCAATTGT_F	C	T	.	.	NS=8;AF=0.167	GT	.	.	.	.	.	.	.	0	.	.	0	1	1	1	1	.	.	.	.	.	.	.	.	.	1	.	.	.	0	.
1	1830873	AAAACGCGA.AGCATCTCG_F	C	G	.	.	NS=13;AF=0.100	GT	1	1	1	0	0	.	0	0	.	0	0	.	.	.	.	.	.	.	.	.	.	.	.	.	.	0	0	0	0	.
1	4540234	AAAACGCGA.AGTCCGCGT_R	A	G	.	.	NS=12;AF=0.067	GT	.	1	1	0	.	0	.	0	0	.	0	.	.	.	0	.	.	.	.	.	.	.	.	.	.	0	0	0	0	.
1	1779831	AAAACGCGA.AGTGAAAAG_F	G	T	.	.	NS=4;AF=0.100	GT	.	.	.	.	.	.	.	.	.	.	0	.	.	.	.	.	.	1	.	.	1	1	.	.	.	.	.	.	.	.
1	4198358	AAAACGCGA.CATGCCCCG_R	C	T	.	.	NS=3;AF=0.033	GT	.	.	.	.	.	.	.	1	.	.	0	.	.	.	.	.	.	.	.	.	.	.	.	.	.	.	.	.	0	.
1	3061786	AAAACGCGA.CGAGCGAGA_R	T	C	.	.	NS=28;AF=0.033	GT	0	0	0	0	0	.	0	0	1	0	0	0	0	0	0	0	0	0	0	0	0	0	0	0	0	0	0	0	0	.
1	2715579	AAAACGCGA.GCCCTGGCC_R	G	T	.	.	NS=9;AF=0.233	GT	.	1	1	.	1	.	1	0	.	.	0	.	.	.	.	.	.	.	.	.	.	.	.	.	.	1	1	1	.	.
1	3641735	AAAACGCGA.TAAATAAAA_F	T	C	.	.	NS=16;AF=0.300	GT	.	.	.	.	.	.	.	0	0	.	0	.	.	.	.	1	1	1	1	1	1	1	1	1	.	0	0	0	0	.
1	2773724	AAAACGCGA.TGATTGATG_F	A	T	.	.	NS=24;AF=0.333	GT	0	0	0	0	0	1	0	0	0	0	0	.	.	.	.	1	1	1	1	1	1	1	1	1	.	0	0	0	0	.
1	4159329	AAAACGCGC.ACCAGCGGG_F	C	T	.	.	NS=11;AF=0.100	GT	1	1	1	.	.	.	0	0	0	.	0	0	.	0	0	.	.	.	.	.	.	.	.	.	.	.	.	.	0	.
1	3548568	AAAACGCGC.ATACGCCAG_F	G	A	.	.	NS=12;AF=0.067	GT	.	1	1	0	0	.	0	.	0	0	0	.	0	0	0	.	.	.	.	.	.	.	.	.	0	.	.	.	.	.
1	1181286	AAAACGCGC.CCATCCGAT_R	G	C	.	.	NS=22;AF=0.133	GT	0	0	0	1	1	.	.	0	1	1	0	.	.	.	.	0	0	0	0	0	0	0	0	0	.	0	0	0	0	.
1	1331204	AAAACGCGC.CCGCCTTCC_F	A	C,G	.	.	NS=15;AF=0.033,0.267	GT	.	.	.	2	2	.	1	0	.	2	0	2	2	2	2	.	.	.	.	.	.	.	.	.	2	0	0	0	0	.
1	1048749	AAAACGCGC.CGCGCGCAC_R	G	A,T	.	.	NS=9;AF=0.033,0.033	GT	0	0	0	.	.	1	.	0	2	.	0	.	.	.	.	.	.	.	.	.	.	.	.	.	.	.	.	.	0	0
1	2856237	AAAACGCGC.CGGCGCGGC_R	A	C	.	.	NS=3;AF=0.033	GT	.	.	.	.	.	.	.	.	.	.	0	.	.	.	.	.	.	.	.	.	.	.	.	.	.	1	.	.	0	.
1	523808	AAAACGCGC.GATGACATC_R	G	A	.	.	NS=13;AF=0.200	GT	0	.	0	.	.	.	0	0	1	0	0	1	1	1	1	.	.	.	.	.	.	.	.	.	1	.	.	.	0	.
1	4513715	AAAACGCGC.GATGCTTCG_F	A	G	.	.	NS=8;AF=0.100	GT	1	1	1	.	.	0	.	0	0	.	0	.	.	.	.	.	.	.	.	.	.	.	.	.	.	.	.	.	0	.
1	412975	AAAACGCGC.GCAATTATG_F	T	A,C	.	.	NS=29;AF=0.067,0.100	GT	0	0	0	2	2	.	1	0	0	2	0	0	0	0	0	0	0	0	0	0	0	0	0	0	0	0	0	0	0	1
1	4341010	AAAACGCGC.GCCCACAGC_R	G	A	.	.	NS=9;AF=0.067	GT	0	1	1	.	.	.	.	0	.	.	0	.	.	.	.	.	.	.	.	.	.	.	.	.	.	0	0	0	0	.
1	2458702	AAAACGCGC.TCCGAAAAC_R	G	A	.	.	NS=7;AF=0.133	GT	.	.	.	.	.	.	1	0	.	.	0	.	.	.	.	.	.	.	.	.	.	.	.	.	.	1	1	1	0	.
1	2005885	AAAACGCGC.TGGATCGTC_R	T	G	.	.	NS=14;AF=0.267	GT	.	.	.	.	.	.	0	0	0	1	0	1	1	1	1	.	.	.	.	.	.	.	.	.	1	0	1	1	0	.
1	59103	AAAACGCGC.TTAAACTGT_R	A	G	.	.	NS=2;AF=0.033	GT	.	.	.	.	.	.	.	.	.	.	0	.	.	.	.	.	.	.	.	.	.	.	.	.	.	.	.	.	1	.
1	3651329	AAAACGCGG.AAGGTGGTG_F	T	C	.	.	NS=9;AF=0.267	GT	1	1	1	.	.	.	1	1	.	.	0	.	.	.	.	.	.	.	1	1	.	.	.	.	.	.	.	.	1	.
1	4124036	AAAACGCGG.ATCGCCCAG_F	G	C	.	.	NS=4;AF=0.033	GT	.	.	.	.	.	.	.	0	1	.	0	.	.	.	.	.	.	.	.	.	.	.	.	.	.	.	.	.	0	.
1	2134025	AAAACGCGG.ATTAAGAAC_R	G	C	.	.	NS=13;AF=0.033	GT	.	0	0	.	.	.	1	0	.	.	0	0	0	0	0	.	.	.	.	.	.	.	.	.	0	.	0	0	0	.
1	1656646	AAAACGCGG.CCCAGATTC_R	C	A	.	.	NS=3;AF=0.033	GT	.	.	.	.	.	.	.	0	.	.	0	.	.	.	.	.	.	.	.	.	.	.	.	.	.	.	.	.	1	.
1	3404944	AAAACGCGG.CGACTCGGC_F	C	T	.	.	NS=4;AF=0.067	GT	1	.	.	.	.	.	.	0	.	.	0	.	.	.	.	.	.	.	.	.	.	.	.	.	.	.	.	.	1	.
1	1704669	AAAACGCGG.CGGGGCGAA_R	T	C	.	.	NS=7;AF=0.133	GT	.	.	.	0	0	.	.	.	.	.	0	.	.	.	.	.	.	.	.	.	.	.	.	.	.	1	1	1	1	.
1	369714	AAAACGCGG.CTCAACCGC_R	G	A	.	.	NS=7;AF=0.033	GT	0	.	0	.	.	.	.	0	1	.	0	.	.	.	.	.	.	.	.	.	.	.	.	.	.	.	.	.	0	0
1	439812	AAAACGCGG.CTGCTGATC_F	G	C	.	.	NS=8;AF=0.100	GT	.	.	.	.	.	.	.	0	.	.	0	.	.	.	0	.	.	.	.	.	.	.	.	.	0	1	1	1	0	.
1	1409762	AAAACGCGG.CTGCTTTAC_R	C	G	.	.	NS=16;AF=0.133	GT	1	1	1	.	.	0	.	0	1	.	0	.	.	.	.	.	0	0	0	0	0	0	0	0	.	.	.	.	0	.
1	1109516	AAAACGCGG.GACGAGCGG_R	A	G	.	.	NS=17;AF=0.467	GT	1	1	1	1	1	1	.	0	.	.	0	1	1	1	1	.	.	.	.	.	.	.	.	.	1	1	1	1	0	.
1	4604846	AAAACGCGG.GAGCTGCTG_F	T	C	.	.	NS=22;AF=0.367	GT	.	.	.	1	1	1	.	.	.	.	0	1	1	1	1	0	0	0	0	0	0	0	0	0	1	1	1	1	0	.
1	1749704	AAAACGCGG.GTCACGTCC_R	G	C	.	.	NS=15;AF=0.033	GT	.	.	.	0	0	.	.	0	.	.	0	.	.	.	.	0	0	0	0	0	0	0	0	0	.	.	.	.	0	1
1	4540291	AAAACGCGG.TCCAGCGTC_F	G	A	.	.	NS=4;AF=0.033	GT	.	.	.	.	.	1	.	0	.	.	0	.	.	.	.	.	.	.	.	.	.	.	.	.	.	.	.	.	0	.
1	2785968	AAAACGCGT.ATCGTCTGC_F	T	C	.	.	NS=15;AF=0.300	GT	.	.	.	.	.	.	.	0	.	.	0	.	.	.	.	1	1	1	1	1	1	1	1	1	.	0	0	0	0	.
1	1872045	AAAACGCGT.GACAGACCG_F	G	A	.	.	NS=4;AF=0.033	GT	.	.	.	.	.	.	.	0	1	.	0	.	.	.	.	.	.	.	.	.	.	.	.	.	.	.	.	.	0	.
1	272369	AAAACGCGT.GAGCCGATC_F	T	A	.	.	NS=11;AF=0.200	GT	.	1	1	1	1	.	0	.	1	1	0	.	.	.	.	.	.	.	.	.	.	.	.	.	.	.	0	0	0	.
1	3742620	AAAACGCGT.GCCGGGCTG_R	A	G	.	.	NS=7;AF=0.033	GT	.	.	.	.	.	.	.	0	1	.	0	.	.	.	.	.	.	.	.	.	.	.	.	.	.	0	0	0	0	.
1	745361	AAAACGCGT.TCAGTGGGG_F	C	T	.	.	NS=18;AF=0.167	GT	0	0	0	0	0	.	0	0	0	1	0	1	1	1	1	.	.	.	.	.	.	.	.	.	.	0	0	0	0	.
1	3515061	AAAACGCGT.TGCAGGAAT_R	G	A	.	.	NS=26;AF=0.033	GT	0	0	0	.	.	0	0	0	1	.	0	0	0	0	0	0	0	0	0	0	0	0	0	0	0	0	0	0	0	.
1	1228742	AAAACGCGT.TTCACGCTC_F	A	G	.	.	NS=6;AF=0.067	GT	.	.	.	.	.	.	1	0	1	0	0	.	.	.	.	.	.	.	.	.	.	.	.	.	.	.	.	.	0	.
1	4073355	AAAACGCTA.CCCGGCACG_F	C	T	.	.	NS=7;AF=0.033	GT	1	.	.	0	0	.	0	0	.	.	0	.	.	.	.	.	.	.	.	.	.	.	.	.	.	.	.	.	0	.
1	1288288	AAAACGCTA.CGCGACTGG_R	A	G	.	.	NS=21;AF=0.033	GT	.	.	.	0	0	.	.	0	.	0	0	0	0	0	0	0	0	0	0	0	0	0	0	0	0	.	.	.	0	1
1	3035504	AAAACGCTA.GCCGATGAA_F	T	C	.	.	NS=13;AF=0.033	GT	0	0	0	0	0	.	0	0	.	0	0	.	.	.	.	.	.	.	.	.	.	.	.	.	.	0	0	1	0	.
1	929766	AAAACGCTA.GCGTCCATA_F	T	C	.	.	NS=3;AF=0.067	GT	.	.	.	.	.	.	.	1	.	.	0	.	.	.	.	.	.	.	.	.	.	.	.	.	.	.	.	.	1	.
1	3410076	AAAACGCTA.GGCTTTATC_R	G	A	.	.	NS=25;AF=0.067	GT	0	0	.	0	.	0	0	0	1	0	0	0	0	0	0	.	.	0	0	0	0	0	0	0	0	0	0	0	.	1
1	3898064	AAAACGCTC.AAGTAAGGA_R	T	C	.	.	NS=4;AF=0.033	GT	1	.	.	.	.	.	.	0	.	.	0	.	.	.	.	.	.	.	.	.	.	.	.	.	.	.	.	.	0	.
1	2628358	AAAACGCTC.ACCAGCGTG_R	C	T	.	.	NS=9;AF=0.100	GT	0	0	0	1	1	.	.	0	.	1	0	.	.	.	.	.	.	.	.	.	.	.	.	.	.	.	.	.	0	.
1	2863312	AAAACGCTC.AGCTGTTCC_R	G	T	.	.	NS=6;AF=0.100	GT	.	.	.	.	.	.	.	.	0	.	0	.	.	.	.	.	1	1	.	.	.	.	1	.	.	.	.	.	0	.
1	3983816	AAAACGCTC.ATCAGCTTT_R	C	T	.	.	NS=6;AF=0.100	GT	1	1	1	.	.	.	.	0	.	.	0	.	.	.	.	.	.	.	.	.	.	.	.	.	.	.	.	.	0	.
1	2490073	AAAACGCTC.ATGTCTTTT_R	C	T	.	.	NS=14;AF=0.400	GT	1	1	1	1	1	.	1	1	.	1	0	1	1	.	1	.	.	.	.	.	.	.	.	.	1	.	.	.	0	.
1	1676293	AAAACGCTC.CCATGATTG_R	C	T	.	.	NS=4;AF=0.033	GT	.	.	.	.	.	.	.	0	1	.	0	.	.	.	.	.	.	.	.	.	.	.	.	.	.	.	.	.	0	.
1	4193511	AAAACGCTC.CCCGCACGG_R	C	T	.	.	NS=16;AF=0.167	GT	0	0	0	0	.	.	.	0	0	.	0	1	1	1	1	.	.	.	.	.	.	.	.	.	1	0	0	0	0	.
1	1418077	AAAACGCTC.CCGGGGACG_F	G	T	.	.	NS=23;AF=0.300	GT	0	0	0	0	0	0	0	0	.	0	0	.	.	.	.	1	1	1	1	1	1	1	1	1	.	0	0	0	0	.
1	413614	AAAACGCTC.GCCACGCGG_R	A	G	.	.	NS=17;AF=0.400	GT	.	.	.	0	.	.	.	0	.	0	0	1	1	1	.	1	1	1	1	1	1	1	1	1	.	.	.	.	0	.
1	1596479	AAAACGCTC.GCCAGGGCA_R	G	A	.	.	NS=6;AF=0.100	GT	.	.	.	.	.	.	.	0	.	.	0	.	.	.	.	.	.	.	.	.	.	.	.	.	.	1	1	1	0	.
1	1700855	AAAACGCTC.GGCTCGCGG_F	C	A,G	.	.	NS=8;AF=0.167,0.033	GT	.	.	2	.	.	.	.	0	.	.	0	1	1	1	1	.	.	.	.	.	.	.	.	.	1	.	.	.	.	.
1	1368467	AAAACGCTC.GGGGAAAAG_F	T	C	.	.	NS=4;AF=0.033	GT	.	.	.	.	.	.	.	0	1	.	0	.	.	.	.	.	.	.	.	.	.	.	.	.	.	.	.	.	0	.
1	4226714	AAAACGCTC.GTTGCCTGC_R	C	T	.	.	NS=4;AF=0.033	GT	.	.	.	.	.	.	.	0	1	.	0	.	.	.	.	.	.	.	.	.	.	.	.	.	.	.	.	.	0	.
1	638818	AAAACGCTC.TCCAGCAGG_F	G	A	.	.	NS=4;AF=0.067	GT	.	.	.	.	.	.	.	0	1	.	0	.	.	.	.	.	.	.	.	.	.	.	.	.	.	.	.	.	1	.
1	730729	AAAACGCTC.TCGCCAAAG_R	A	G	.	.	NS=4;AF=0.067	GT	.	.	.	.	.	.	.	.	.	.	0	.	.	.	.	.	.	.	.	.	1	1	.	.	.	.	.	.	0	.
1	4362203	AAAACGCTC.TGCTGGTTA_R	A	G	.	.	NS=24;AF=0.133	GT	1	1	1	0	.	1	.	0	0	0	0	0	0	0	0	0	0	0	0	0	0	0	0	0	0	.	.	.	0	.
1	2011964	AAAACGCTG.AAGAGATTG_R	C	T	.	.	NS=10;AF=0.233	GT	1	1	1	.	.	.	1	0	.	.	0	.	.	.	.	.	.	.	.	.	.	.	.	.	.	1	1	1	0	.
1	3241955	AAAACGCTG.AGCAGCCCG_R	G	A	.	.	NS=9;AF=0.033	GT	0	0	0	0	1	.	.	0	.	0	0	.	.	.	.	.	.	.	.	.	.	.	.	.	.	.	.	.	0	.
1	3142950	AAAACGCTG.AGCAGCTGA_R	G	C	.	.	NS=16;AF=0.033	GT	0	0	0	.	.	.	0	0	.	.	0	0	0	0	0	.	.	.	.	.	.	.	.	.	0	0	0	0	0	1
1	1968719	AAAACGCTG.AGTCCGCTG_R	G	A	.	.	NS=2;AF=0.033	GT	.	.	.	.	.	.	.	.	.	.	0	.	.	.	.	.	.	.	.	.	.	.	.	.	.	.	.	.	1	.
1	1148709	AAAACGCTG.CATTTCGCC_R	G	A	.	.	NS=21;AF=0.300	GT	0	0	0	.	.	.	0	0	.	.	0	0	0	0	0	1	1	1	1	1	1	1	1	1	0	.	.	.	0	.
1	2906560	AAAACGCTG.CGAGCGAGG_R	C	T	.	.	NS=4;AF=0.033	GT	.	.	.	.	.	.	.	0	1	.	0	.	.	.	.	.	.	.	.	.	.	.	.	.	.	.	.	.	0	.
1	3778578	AAAACGCTG.CGCCAGGCA_F	G	A	.	.	NS=24;AF=0.467	GT	.	.	.	0	0	0	.	0	1	0	0	1	1	1	1	.	1	1	1	1	1	1	1	1	1	0	0	0	0	.
1	1375869	AAAACGCTG.CGGAGCTGA_R	G	C	.	.	NS=13;AF=0.100	GT	0	.	1	.	.	.	0	0	1	.	0	0	0	0	0	1	.	.	.	.	.	.	.	.	0	.	.	.	0	.
1	3599528	AAAACGCTG.CGGGTAAGC_F	T	G	.	.	NS=2;AF=0.033	GT	1	.	.	.	.	.	.	.	.	.	0	.	.	.	.	.	.	.	.	.	.	.	.	.	.	.	.	.	.	.
1	3727253	AAAACGCTG.GCGCCAAAG_F	C	T	.	.	NS=3;AF=0.033	GT	.	.	.	.	.	.	.	0	.	.	0	.	.	.	.	.	.	.	.	.	.	.	.	.	.	.	.	.	1	.
1	2056572	AAAACGCTG.GCGGCGGAT_F	C	T	.	.	NS=19;AF=0.233	GT	0	0	0	0	0	.	0	0	1	0	0	1	1	1	1	.	.	.	.	.	.	.	.	.	1	0	0	1	0	.
1	4536890	AAAACGCTG.TCCATCCAC_F	C	T	.	.	NS=20;AF=0.233	GT	1	1	1	0	0	.	0	0	1	0	0	0	0	0	0	.	.	.	.	.	.	.	.	.	0	1	1	1	0	0
1	28490	AAAACGCTG.TCGGCAACG_R	A	C	.	.	NS=26;AF=0.033	GT	0	0	.	.	.	.	0	0	0	0	0	0	0	0	0	0	0	0	0	0	0	0	0	0	0	0	0	0	0	1
1	4385113	AAAACGCTG.TGAGCGTAT_F	C	T	.	.	NS=6;AF=0.100	GT	.	.	.	.	.	.	.	0	.	.	0	1	1	.	.	.	.	.	.	.	.	.	.	.	1	.	.	.	0	.
1	3056158	AAAACGCTG.TGATCCGCG_R	G	A	.	.	NS=25;AF=0.267	GT	0	0	.	0	0	.	0	0	0	0	0	0	0	0	0	0	1	1	1	1	1	1	1	1	.	0	0	.	0	.
1	2927888	AAAACGCTG.TGCCACTGC_F	C	T	.	.	NS=3;AF=0.067	GT	.	.	.	.	.	.	.	1	.	.	0	.	.	.	.	.	.	.	.	.	.	.	.	.	.	.	.	.	1	.
1	4522175	AAAACGCTG.TGCTTGAAG_R	G	A	.	.	NS=11;AF=0.167	GT	.	.	.	.	.	.	0	0	.	.	0	1	1	1	1	.	.	.	.	.	.	.	.	.	1	0	.	0	0	.
1	946003	AAAACGCTG.TGGGCGCAG_F	C	T	.	.	NS=4;AF=0.067	GT	.	.	.	.	.	.	.	.	0	.	0	.	1	.	.	.	.	.	.	.	.	.	.	.	1	.	.	.	.	.
1	2347154	AAAACGCTG.TGTGGGAAG_R	G	A	.	.	NS=23;AF=0.033	GT	0	.	.	0	0	.	0	0	1	0	0	0	0	0	0	0	0	0	0	0	0	0	0	0	0	.	.	.	0	.
1	2475749	AAAACGCTG.TGTTTAAGC_F	A	T	.	.	NS=17;AF=0.033	GT	0	0	0	.	.	0	0	0	1	.	0	.	.	.	.	.	0	0	.	.	0	0	0	.	.	0	0	0	0	.
1	1546330	AAAACGCTT.AAGGCGCTG_F	C	T	.	.	NS=20;AF=0.033	GT	0	0	0	0	0	1	0	0	0	0	0	0	0	0	0	.	.	.	.	.	.	.	.	.	0	0	0	0	0	.
1	1018288	AAAACGCTT.ATCAGGCTT_R	T	C	.	.	NS=13;AF=0.033	GT	0	0	0	.	.	.	.	0	1	.	0	0	0	.	.	.	.	.	.	.	.	.	.	.	0	0	0	0	0	.
1	1618618	AAAACGCTT.CCGGACACC_R	A	G	.	.	NS=17;AF=0.533	GT	1	1	.	1	1	.	1	1	1	1	0	1	1	1	1	.	.	.	.	.	.	.	.	.	1	1	1	1	.	.
1	3806025	AAAACGCTT.GCCAAAATT_R	G	A	.	.	NS=5;AF=0.033	GT	.	.	.	.	.	1	.	0	.	.	0	.	.	.	.	.	.	.	.	.	.	.	.	.	.	0	.	.	0	.
1	2329829	AAAACGCTT.GGATTGGCG_F	C	T	.	.	NS=5;AF=0.033	GT	.	0	0	.	.	.	.	0	.	.	0	.	.	.	.	.	.	.	.	.	.	.	.	.	.	.	.	.	1	.
1	1649395	AAAACGCTT.TGCAGTGGG_F	C	T	.	.	NS=2;AF=0.033	GT	.	.	.	.	.	.	.	.	1	.	0	.	.	.	.	.	.	.	.	.	.	.	.	.	.	.	.	.	.	.
1	4127080	AAAACGGAA.GGTTTTGTC_R	C	A	.	.	NS=18;AF=0.200	GT	1	1	1	1	1	.	0	0	.	1	0	0	0	0	0	.	.	.	.	.	.	.	.	.	0	0	0	0	0	.
1	400849	AAAACGGAA.TGTGCAGCC_F	C	A	.	.	NS=30;AF=0.033	GT	0	0	0	0	0	0	0	0	0	0	0	0	0	0	0	0	0	0	0	0	0	0	0	0	0	0	0	0	0	1
1	2354205	AAAACGGAC.CTGAATAAT_R	A	C	.	.	NS=16;AF=0.033	GT	0	0	0	0	0	.	1	0	.	0	0	0	0	0	.	.	.	.	.	.	.	.	.	.	0	0	0	.	0	.
1	1995904	AAAACGGAC.CTGGTTCTG_R	T	C	.	.	NS=7;AF=0.100	GT	.	.	0	.	.	.	.	0	.	.	0	.	.	.	.	.	.	.	.	.	.	.	.	.	.	1	1	1	0	.
1	714055	AAAACGGAT.ACGTGCCAG_F	G	A	.	.	NS=4;AF=0.033	GT	.	.	.	.	.	.	.	0	1	.	0	.	.	.	.	.	.	.	.	.	.	.	.	.	.	.	.	.	0	.
1	4091273	AAAACGGAT.GCCTCAAAC_F	C	G	.	.	NS=3;AF=0.033	GT	.	.	.	.	.	.	.	.	1	.	0	.	.	.	.	.	.	.	.	.	.	.	.	.	.	.	.	.	0	.
1	2731708	AAAACGGAT.GGTTTCGCC_F	C	G	.	.	NS=5;AF=0.033	GT	.	.	0	.	.	1	.	0	.	.	0	.	.	.	.	.	.	.	.	.	.	.	.	.	.	.	.	.	0	.
1	2195568	AAAACGGAT.TTGACAGCG_R	C	T	.	.	NS=6;AF=0.033	GT	.	.	.	0	0	.	.	.	.	1	0	.	.	.	.	.	.	.	.	.	.	.	.	.	.	0	0	.	.	.
1	2870463	AAAACGGCA.CATGCCTTT_F	G	A	.	.	NS=20;AF=0.167	GT	.	0	0	0	0	0	0	0	0	0	0	1	1	1	1	.	.	.	.	.	.	.	.	.	1	0	0	0	0	0
1	2240539	AAAACGGCA.CCCCTTAGC_F	C	T	.	.	NS=2;AF=0.033	GT	.	.	.	.	.	.	.	1	.	.	0	.	.	.	.	.	.	.	.	.	.	.	.	.	.	.	.	.	.	.
1	1326295	AAAACGGCA.CCCGAGGGT_R	T	C	.	.	NS=8;AF=0.167	GT	.	.	.	.	.	.	0	.	.	.	0	1	1	1	1	.	.	.	.	.	.	.	.	.	1	.	.	.	0	.
1	197331	AAAACGGCA.CTGGATGGA_F	A	G	.	.	NS=5;AF=0.067	GT	.	.	.	.	.	.	.	0	.	.	0	.	.	.	.	.	.	.	.	.	.	.	.	.	.	1	.	1	0	.
1	3146962	AAAACGGCA.GCTGACGCT_F	A	C	.	.	NS=16;AF=0.233	GT	.	.	.	0	0	.	.	0	.	0	0	.	.	.	.	1	1	1	.	.	1	1	1	1	.	0	0	0	0	.
1	2276316	AAAACGGCA.TATCAGCAG_R	C	T	.	.	NS=4;AF=0.033	GT	.	.	.	.	.	.	1	0	.	.	0	.	.	.	.	.	.	.	.	.	.	.	.	.	.	.	.	.	0	.
1	2202173	AAAACGGCA.TGCTCAACG_R	A	T	.	.	NS=2;AF=0.033	GT	.	.	.	.	.	.	.	1	.	.	0	.	.	.	.	.	.	.	.	.	.	.	.	.	.	.	.	.	.	.
1	1396295	AAAACGGCC.GCGCCGTTT_R	A	G	.	.	NS=26;AF=0.300	GT	1	1	1	1	1	.	1	0	0	1	0	0	0	0	0	0	0	0	0	0	0	0	0	0	0	1	1	.	.	.
1	1447526	AAAACGGCC.GGCAGCGTA_R	G	A	.	.	NS=29;AF=0.033	GT	0	0	0	0	0	1	0	0	0	0	0	0	0	0	0	0	0	0	0	0	0	0	0	0	0	0	0	0	0	.
1	4441345	AAAACGGCC.TCACGTGCC_R	A	C	.	.	NS=4;AF=0.033	GT	.	.	.	.	.	.	.	0	1	.	0	.	.	.	.	.	.	.	.	.	.	.	.	.	.	.	.	.	0	.
1	1702202	AAAACGGCC.TCCAGTTTT_F	C	T	.	.	NS=4;AF=0.033	GT	.	.	.	.	.	.	.	0	1	.	0	.	.	.	.	.	.	.	.	.	.	.	.	.	.	.	.	.	0	.
1	2345060	AAAACGGCC.TGCTGCTGC_R	G	A,T	.	.	NS=17;AF=0.033,0.433	GT	2	2	2	2	2	.	2	1	.	.	0	2	2	2	2	.	.	.	.	.	.	.	.	.	2	0	2	2	0	.
1	3391557	AAAACGGCC.TTAAACGCG_F	G	A	.	.	NS=3;AF=0.033	GT	.	.	.	.	.	.	.	1	.	.	0	.	.	.	.	.	.	.	.	.	.	.	.	.	.	.	0	.	.	.
1	1906298	AAAACGGCG.AAATTAGCG_R	G	A	.	.	NS=5;AF=0.067	GT	.	.	.	.	.	.	.	0	.	.	0	.	.	.	.	.	.	.	.	.	.	.	.	.	.	0	1	1	.	.
1	1877259	AAAACGGCG.CCAGATCAA_F	A	G	.	.	NS=10;AF=0.033	GT	.	.	.	.	.	.	.	0	.	0	0	0	0	0	0	.	.	.	.	.	.	.	.	.	0	0	.	1	.	.
1	704916	AAAACGGCG.CTTCTTCGC_R	A	C	.	.	NS=4;AF=0.033	GT	.	.	.	.	.	.	.	.	.	.	0	.	.	.	.	.	.	.	.	.	.	.	.	.	.	.	1	.	0	0
1	98817	AAAACGGCG.GCAAGTTCG_R	T	C	.	.	NS=4;AF=0.067	GT	.	.	.	.	.	.	.	0	1	.	0	.	.	.	.	.	.	.	.	.	.	.	.	.	.	.	.	.	1	.
1	3931516	AAAACGGCG.GCGAACTCA_F	G	C	.	.	NS=12;AF=0.033	GT	.	.	.	.	.	.	.	0	.	.	0	.	.	.	.	1	0	0	0	0	0	0	0	0	.	.	.	.	0	.
1	25759	AAAACGGCG.GGGCTGACA_F	T	G	.	.	NS=11;AF=0.133	GT	0	0	0	.	.	.	0	0	.	.	0	1	1	.	1	.	.	.	.	.	.	.	.	.	1	.	.	.	0	.
1	2568661	AAAACGGCG.TGTTCCATG_R	A	G	.	.	NS=29;AF=0.033	GT	0	0	0	0	0	1	0	0	0	0	0	0	0	0	0	0	0	0	0	0	0	0	0	0	0	0	0	0	0	.
1	411295	AAAACGGCT.AAAGACCTG_R	C	G	.	.	NS=3;AF=0.033	GT	.	.	.	.	.	1	.	.	.	.	0	.	.	.	.	.	.	.	.	.	.	.	.	.	.	.	.	.	0	.
1	4600693	AAAACGGCT.AGATCTTCA_R	G	T	.	.	NS=30;AF=0.167	GT	0	0	0	0	0	0	0	0	0	0	0	1	1	1	1	0	0	0	0	0	0	0	0	0	1	0	0	0	0	0
1	3762062	AAAACGGCT.CAGGCCGTA_R	C	A	.	.	NS=13;AF=0.333	GT	.	.	.	.	.	.	.	0	1	1	0	1	1	1	1	.	.	.	.	.	.	.	.	.	1	1	1	1	0	.
1	1893084	AAAACGGCT.GCGCAGCAG_R	C	G	.	.	NS=4;AF=0.100	GT	.	.	.	.	.	.	.	.	.	.	0	.	.	.	.	.	.	.	.	.	.	.	.	.	.	1	1	1	.	.
1	1439210	AAAACGGCT.GCTTCTGTG_F	T	G	.	.	NS=3;AF=0.067	GT	.	.	.	.	.	.	.	1	.	.	0	.	.	.	.	.	.	.	.	.	.	.	.	.	.	.	.	.	1	.
1	4554578	AAAACGGCT.TATCGTCAA_R	C	G	.	.	NS=2;AF=0.033	GT	.	.	.	.	.	.	.	.	.	.	0	.	.	.	.	.	.	.	.	.	.	.	.	.	.	.	.	1	.	.
1	1373790	AAAACGGCT.TTCGCGATG_F	T	C	.	.	NS=12;AF=0.200	GT	1	0	0	1	0	.	1	0	.	.	0	.	.	.	.	.	.	.	.	.	.	.	.	.	.	1	1	1	0	.
1	4119326	AAAACGGGA.GACTGTCGA_R	C	G,T	.	.	NS=20;AF=0.033,0.267	GT	0	0	0	2	2	1	0	0	0	2	0	2	2	2	2	.	.	.	.	.	.	.	.	.	2	0	0	0	0	.
1	2593966	AAAACGGGC.AAATGGCCG_F	G	A	.	.	NS=11;AF=0.300	GT	.	.	.	.	.	.	.	.	.	.	0	.	.	.	.	1	1	1	1	1	1	1	1	1	.	.	.	.	0	.
1	4443472	AAAACGGGC.AGCCCGCTG_F	C	T	.	.	NS=19;AF=0.067	GT	0	0	0	.	.	.	.	.	.	.	0	0	0	.	.	0	0	0	0	0	1	1	0	0	0	0	0	0	.	.
1	1715457	AAAACGGGC.ATGGTGTCG_R	A	T	.	.	NS=2;AF=0.033	GT	.	.	.	.	.	.	.	.	.	.	0	.	.	.	.	.	.	.	.	.	.	.	.	.	.	.	.	.	1	.
1	4557984	AAAACGGGC.CCCACGGCG_F	A	T	.	.	NS=3;AF=0.033	GT	.	.	.	.	.	.	.	0	.	.	0	.	.	.	.	.	.	.	.	.	.	.	.	.	.	.	.	.	1	.
1	1239221	AAAACGGGC.CGGCAAGGG_F	A	G	.	.	NS=3;AF=0.033	GT	.	.	.	.	.	.	.	1	.	.	0	.	.	.	.	.	.	.	.	.	.	.	.	.	.	.	.	.	0	.
1	3859966	AAAACGGGC.GAATTTCCG_F	T	C,G	.	.	NS=24;AF=0.367,0.300	GT	1	1	1	1	1	.	.	0	.	.	0	1	1	1	1	2	2	2	2	2	2	2	2	2	1	1	.	0	0	.
1	3830023	AAAACGGGC.GAGACAAAG_R	T	A,C	.	.	NS=8;AF=0.033,0.133	GT	.	1	2	.	.	.	.	0	.	.	0	.	.	.	.	.	.	.	.	.	.	.	.	.	.	2	2	2	0	.
1	393058	AAAACGGGC.GCGCATGAC_R	A	C,T	.	.	NS=10;AF=0.133,0.067	GT	1	1	1	.	.	.	.	2	1	.	0	.	.	.	.	.	.	.	.	.	.	.	.	.	.	0	0	0	2	.
1	1528505	AAAACGGGC.GGCCGGAAA_F	T	C	.	.	NS=3;AF=0.033	GT	.	.	.	.	.	.	.	1	.	.	0	.	.	.	.	.	.	.	.	.	.	.	.	.	.	.	.	.	0	.
1	3015320	AAAACGGGC.TAGGCGCGG_R	T	C	.	.	NS=17;AF=0.300	GT	.	1	.	1	1	.	1	0	1	1	0	0	0	0	0	.	.	.	.	.	.	.	.	.	0	1	1	1	0	.
1	161396	AAAACGGGC.TTCACGGCG_F	A	G	.	.	NS=4;AF=0.033	GT	.	.	.	.	.	1	.	0	.	.	0	.	.	.	.	.	.	.	.	.	.	.	.	.	.	.	.	.	0	.
1	1430122	AAAACGGGT.AACGGCTGG_R	C	A	.	.	NS=10;AF=0.033	GT	.	.	.	0	0	1	.	0	.	0	0	.	.	.	.	.	.	.	.	.	.	.	.	.	.	0	0	0	0	.
1	3220487	AAAACGGGT.AATTGTGAG_F	G	C	.	.	NS=9;AF=0.200	GT	.	.	.	.	.	.	1	0	.	.	0	1	1	1	1	.	.	.	.	.	.	.	.	.	1	.	.	.	0	.
1	3195887	AAAACGGGT.AGCCTCTCA_F	C	A	.	.	NS=11;AF=0.267	GT	1	.	.	.	.	.	1	0	1	.	0	1	1	1	1	.	.	.	.	.	.	.	.	.	1	.	.	.	0	.
1	1709236	AAAACGGGT.CCCTCTTCG_R	G	A,C	.	.	NS=6;AF=0.067,0.033	GT	.	.	.	.	.	.	.	0	.	.	0	.	.	.	.	.	.	.	.	.	.	.	.	.	.	1	1	2	0	.
1	3243347	AAAACGGGT.TCGTTCATT_R	T	C	.	.	NS=14;AF=0.100	GT	1	1	1	.	.	.	.	0	.	.	0	0	0	0	0	.	.	.	.	.	.	.	.	.	0	0	0	0	0	.
1	1528424	AAAACGGGT.TGCGGGTTC_F	A	G	.	.	NS=16;AF=0.400	GT	0	1	1	.	.	.	.	0	.	.	0	.	1	.	.	1	1	1	1	1	1	1	1	1	.	.	.	.	0	.
1	2972967	AAAACGGGT.TGGCGCAGC_F	A	G	.	.	NS=3;AF=0.033	GT	.	.	.	.	.	.	.	1	.	.	0	.	.	.	.	.	.	.	.	.	.	.	.	.	.	.	.	.	0	.
1	1057176	AAAACGGTA.GCGCGATGA_F	G	A	.	.	NS=12;AF=0.300	GT	.	.	.	.	.	.	.	0	.	.	0	.	.	.	.	1	1	1	1	1	1	1	1	1	.	.	.	.	0	.
1	1897811	AAAACGGTC.AGACCGGTT_R	G	C	.	.	NS=8;AF=0.033	GT	1	0	0	.	.	.	0	0	.	0	0	.	.	.	.	.	.	.	.	.	.	.	.	.	.	.	.	.	0	.
1	3894640	AAAACGGTC.GCCTCAACG_R	C	T	.	.	NS=12;AF=0.033	GT	.	0	1	0	0	0	0	0	.	0	0	.	.	.	.	.	.	.	.	.	.	.	.	.	.	0	0	.	0	.
1	2366205	AAAACGGTC.TCAAGCAGC_R	A	C,G,T	.	.	NS=19;AF=0.100,0.033,0.333	GT	1	1	1	0	0	.	3	0	3	3	0	3	3	3	2	.	.	.	.	.	.	.	.	.	3	3	3	3	0	.
1	2086316	AAAACGGTC.TTCAGGACA_R	A	C	.	.	NS=8;AF=0.033	GT	.	0	0	.	.	.	.	0	1	.	0	.	.	.	.	.	.	.	.	.	.	.	.	.	.	0	0	.	0	.
1	368040	AAAACGGTG.GCGTCGGTG_F	C	G	.	.	NS=7;AF=0.067	GT	0	0	0	.	.	.	.	.	.	.	0	.	.	.	.	.	.	.	.	.	.	.	.	.	.	.	1	1	0	.
1	1170752	AAAACGGTG.GCTGCTGAT_F	C	T	.	.	NS=4;AF=0.033	GT	.	.	.	.	.	.	.	1	.	.	0	.	.	.	.	.	.	.	.	.	.	.	.	.	.	.	.	.	0	0
1	3345107	AAAACGGTG.TATAAAATG_F	C	T	.	.	NS=23;AF=0.033	GT	0	0	0	0	0	.	0	0	.	0	0	.	.	.	.	0	0	0	0	0	0	0	0	0	.	0	0	0	0	1
1	4373662	AAAACGGTT.CCCTGATCC_R	C	G	.	.	NS=5;AF=0.067	GT	.	1	1	.	.	.	.	0	.	.	0	.	.	.	.	.	.	.	.	.	.	.	.	.	.	.	.	.	0	.
1	3183124	AAAACGGTT.GCAATGCCC_F	A	C,G	.	.	NS=9;AF=0.033,0.167	GT	2	2	2	.	.	1	.	0	2	2	0	.	.	.	.	.	.	.	.	.	.	.	.	.	.	.	.	.	0	.
1	45138	AAAACGGTT.GGCTCGCGG_F	C	T	.	.	NS=28;AF=0.167	GT	0	0	0	0	0	0	0	0	.	0	0	1	1	1	1	0	0	0	0	0	0	0	0	0	1	0	0	0	0	.
1	2337674	AAAACGTAC.ACGTCATCG_F	A	C	.	.	NS=16;AF=0.100	GT	0	0	.	1	1	.	0	.	.	1	0	0	0	0	0	.	.	.	.	.	.	.	.	.	0	0	0	0	0	.
1	97366	AAAACGTAC.CGCAAAAAC_R	G	C	.	.	NS=29;AF=0.167	GT	0	0	0	0	0	.	0	0	0	0	0	1	1	1	1	0	0	0	0	0	0	0	0	0	1	0	0	0	0	0
1	4707695	AAAACGTAT.CTGACCCTG_R	A	G	.	.	NS=16;AF=0.133	GT	0	1	1	0	0	.	0	0	.	.	0	0	0	0	0	.	.	.	.	.	.	.	.	.	0	.	1	1	0	.
1	2231191	AAAACGTAT.CTTACCCGC_F	T	C	.	.	NS=9;AF=0.033	GT	.	.	.	0	.	.	0	0	1	.	0	.	.	.	.	.	.	.	.	.	.	.	.	.	.	0	0	0	0	.
1	2529528	AAAACGTCA.CAGGCTGCC_F	G	A	.	.	NS=3;AF=0.033	GT	.	.	.	.	.	1	.	.	.	.	0	.	.	.	.	.	.	.	.	.	.	.	.	.	.	.	.	.	0	.
1	122109	AAAACGTCC.CATACGCTG_R	T	C	.	.	NS=6;AF=0.133	GT	.	.	.	.	.	.	.	.	.	1	0	.	.	.	.	.	.	.	.	.	.	.	.	.	.	1	1	1	0	.
1	2399159	AAAACGTCC.CTCCGGCGC_R	A	T	.	.	NS=6;AF=0.067	GT	.	.	.	1	1	.	0	0	.	.	0	.	.	.	.	.	.	.	.	.	.	.	.	.	.	.	.	.	0	.
1	3283087	AAAACGTCC.GACCTGATG_F	T	A	.	.	NS=17;AF=0.067	GT	0	.	.	1	1	0	0	0	0	.	0	.	.	.	.	.	0	0	0	0	0	0	0	0	.	.	.	.	0	.
1	2413962	AAAACGTCG.CCCCAGCAG_F	C	G	.	.	NS=4;AF=0.033	GT	.	.	.	.	.	.	.	0	.	.	0	.	.	.	.	.	.	.	.	.	.	.	.	.	.	.	1	.	0	.
1	847310	AAAACGTCG.CCGGAGTAT_F	T	C	.	.	NS=10;AF=0.033	GT	.	.	.	0	0	.	.	0	.	0	0	0	0	0	0	.	.	.	.	.	.	.	.	.	.	.	.	.	1	.
1	3950813	AAAACGTCG.CGAATTGAT_F	C	T	.	.	NS=21;AF=0.667	GT	1	1	1	.	.	.	.	1	1	.	0	1	1	1	1	1	1	1	1	1	1	1	1	1	1	.	.	.	1	.
1	4343400	AAAACGTCG.CTGATTGGC_F	T	C	.	.	NS=7;AF=0.133	GT	1	1	1	.	.	.	.	0	.	.	0	.	.	.	.	.	.	.	.	.	.	.	.	.	.	.	1	.	0	.
1	3516640	AAAACGTCG.GAACGTCAG_R	G	A	.	.	NS=10;AF=0.233	GT	1	1	1	.	.	.	1	0	1	.	0	.	.	.	.	.	.	.	.	.	.	.	.	.	.	1	1	.	0	.
1	4008054	AAAACGTCG.GGGGAAGTG_R	G	A	.	.	NS=3;AF=0.033	GT	.	.	.	.	.	.	.	0	1	.	0	.	.	.	.	.	.	.	.	.	.	.	.	.	.	.	.	.	.	.
1	1234644	AAAACGTCG.GTGCTGCAA_F	C	G	.	.	NS=4;AF=0.100	GT	.	.	.	.	.	.	.	1	.	.	0	.	.	.	.	.	.	.	.	.	.	.	.	.	.	.	1	.	1	.
1	4615552	AAAACGTCG.TTCTGAGCT_F	T	C	.	.	NS=6;AF=0.067	GT	0	.	.	1	1	.	.	0	.	.	0	.	.	.	.	.	.	.	.	.	.	.	.	.	.	.	.	.	0	.
1	2860867	AAAACGTCT.AAAAATGGC_F	G	T	.	.	NS=3;AF=0.033	GT	.	.	.	.	.	.	.	0	.	.	0	.	.	.	.	.	.	.	.	.	.	.	.	.	.	.	.	.	1	.
1	3879784	AAAACGTCT.AAACCAGCA_F	G	C	.	.	NS=27;AF=0.800	GT	1	1	1	1	1	.	1	0	1	1	0	1	.	1	1	1	1	1	1	1	1	1	1	1	1	1	1	1	0	.
1	105242	AAAACGTCT.CAGGTCTAT_R	G	T	.	.	NS=4;AF=0.033	GT	.	.	.	.	.	.	.	0	.	.	0	.	.	.	.	.	.	.	.	.	.	.	.	.	.	.	.	1	0	.
1	1206610	AAAACGTCT.CCTGAAGAT_R	T	A	.	.	NS=3;AF=0.067	GT	.	.	.	.	.	.	.	1	.	.	0	.	.	.	.	.	.	.	.	.	.	.	.	.	.	.	.	.	1	.
1	4205451	AAAACGTCT.CGCAGCTTA_F	G	T	.	.	NS=8;AF=0.100	GT	1	1	1	.	.	.	.	0	0	0	0	.	.	.	.	.	.	.	.	.	.	.	.	.	.	.	.	.	0	.
1	4610487	AAAACGTCT.GCCTGGCTG_R	A	G	.	.	NS=6;AF=0.133	GT	.	.	.	.	.	.	.	.	.	.	0	.	.	.	.	1	1	.	1	1	.	.	.	.	.	.	.	.	0	.
1	3898400	AAAACGTCT.TGGGAAATA_F	T	C	.	.	NS=8;AF=0.033	GT	0	0	1	.	.	.	0	0	.	0	0	.	.	.	.	.	.	.	.	.	.	.	.	.	.	.	.	.	0	.
1	3867293	AAAACGTGA.ACAAGTCAC_F	C	T	.	.	NS=18;AF=0.033	GT	0	0	0	.	.	0	0	0	0	.	0	0	0	0	0	0	.	.	.	.	.	.	.	.	0	0	0	0	1	.
1	3703782	AAAACGTGA.GCTGACCTG_F	G	A	.	.	NS=11;AF=0.033	GT	.	.	.	.	.	1	.	0	0	.	0	0	0	0	0	.	.	.	.	.	.	.	.	.	0	.	.	0	0	.
1	4113584	AAAACGTGA.GCTGGTGAA_F	A	C	.	.	NS=9;AF=0.033	GT	0	0	0	0	.	0	.	1	.	0	0	.	.	.	.	.	.	.	.	.	.	.	.	.	.	.	.	.	0	.
1	2884893	AAAACGTGC.AATCGTGAC_F	A	G	.	.	NS=19;AF=0.033	GT	.	0	0	.	.	0	.	0	0	.	0	.	.	.	.	0	0	0	0	0	0	0	0	0	.	0	1	0	0	.
1	3643493	AAAACGTGC.ATGGAAAGC_F	G	A	.	.	NS=11;AF=0.267	GT	.	.	.	.	.	.	.	0	.	.	0	.	.	.	.	1	1	1	1	1	1	1	1	.	.	.	.	.	0	.
1	1338662	AAAACGTGC.CGATCTTTC_R	T	C	.	.	NS=10;AF=0.033	GT	0	0	0	.	.	.	.	0	1	.	0	.	.	.	.	.	.	.	.	.	.	.	.	.	.	0	0	0	0	.
1	4219651	AAAACGTGC.GAGGGCGAA_R	G	A	.	.	NS=15;AF=0.400	GT	1	.	.	1	.	.	.	0	1	1	0	1	1	1	1	.	.	.	.	.	.	.	.	.	1	1	1	.	0	1
1	3668264	AAAACGTGC.GCACAAGAT_F	T	A	.	.	NS=21;AF=0.367	GT	0	0	0	1	1	1	0	0	1	1	0	1	1	1	1	.	.	.	.	.	.	.	.	.	1	0	0	0	0	1
1	669516	AAAACGTGC.GCCTATGAC_F	A	G	.	.	NS=15;AF=0.300	GT	1	.	.	1	1	.	.	0	0	1	0	1	1	1	1	.	.	.	.	.	.	.	.	.	.	0	0	1	0	.
1	1743017	AAAACGTGC.GCGGATGAT_F	A	T	.	.	NS=10;AF=0.033	GT	0	.	0	0	0	.	0	0	.	1	0	.	.	.	.	.	.	.	.	.	.	.	.	.	.	0	0	.	.	.
1	1804748	AAAACGTGC.GCGGTCAGT_R	G	A	.	.	NS=6;AF=0.100	GT	.	.	.	.	.	.	.	0	.	.	0	.	.	.	.	.	.	.	.	.	.	.	.	.	.	1	1	1	0	.
1	2226774	AAAACGTGC.GTTCCGCCA_F	T	C	.	.	NS=10;AF=0.300	GT	.	.	.	.	.	.	.	.	.	.	0	.	.	.	.	1	1	1	1	1	1	1	1	1	.	.	.	.	.	.
1	2793011	AAAACGTGG.ACGTACGGA_F	C	T	.	.	NS=21;AF=0.033	GT	.	.	.	.	.	.	.	0	.	.	0	0	0	0	1	0	0	0	0	0	0	0	0	0	0	0	0	0	0	0
1	4708088	AAAACGTGG.CTGCATAGC_R	G	A	.	.	NS=29;AF=0.033	GT	0	0	0	0	0	0	0	0	0	.	0	0	0	0	0	0	0	0	0	0	0	0	0	0	0	0	0	0	0	1
1	4614005	AAAACGTGG.CTGGACGCC_R	G	T	.	.	NS=5;AF=0.100	GT	.	.	.	.	.	.	.	.	.	.	0	.	.	.	.	.	.	.	.	.	.	.	.	.	.	1	1	1	0	.
1	1814142	AAAACGTGG.GCGAAAATT_F	T	C	.	.	NS=5;AF=0.067	GT	.	.	.	1	1	.	.	0	.	.	0	.	.	.	.	.	.	.	.	.	.	.	.	.	.	.	.	.	0	.
1	3016876	AAAACGTGG.GGCAGGCAC_F	G	A	.	.	NS=6;AF=0.100	GT	.	.	.	.	.	.	.	0	.	.	0	.	.	.	.	.	.	.	.	.	.	.	.	.	.	1	1	1	0	.
1	3156068	AAAACGTGG.TGCATGGCG_R	C	T	.	.	NS=29;AF=0.333	GT	0	0	0	0	0	0	0	0	.	0	0	0	0	0	0	1	1	1	1	1	1	1	1	1	0	0	0	0	0	1
1	1354023	AAAACGTGT.CCTATGACT_F	C	T	.	.	NS=3;AF=0.033	GT	.	.	.	.	.	.	.	0	.	.	0	.	.	.	.	.	.	.	.	.	.	.	.	.	.	.	.	.	1	.
1	2773704	AAAACGTTA.AACCATCAC_F	C	T	.	.	NS=11;AF=0.267	GT	.	.	.	.	.	.	.	0	.	.	0	.	.	.	.	1	.	1	1	1	1	1	1	1	.	.	.	.	0	.
1	2619352	AAAACGTTA.CATTTCAGG_F	T	C	.	.	NS=11;AF=0.067	GT	0	1	1	.	.	.	0	0	0	.	0	.	.	.	.	.	.	.	.	.	.	.	.	.	.	0	0	0	0	.
1	4333987	AAAACGTTA.GTTTGCGGC_R	A	G	.	.	NS=2;AF=0.033	GT	.	.	.	.	.	.	.	.	.	.	0	.	.	.	.	.	.	.	.	.	.	.	.	.	.	.	.	.	1	.
1	2213359	AAAACGTTC.ACCACCCGG_F	C	A	.	.	NS=2;AF=0.033	GT	.	.	.	.	.	.	.	1	.	.	0	.	.	.	.	.	.	.	.	.	.	.	.	.	.	.	.	.	.	.
1	782051	AAAACGTTC.CCCATCAGC_R	G	C	.	.	NS=4;AF=0.033	GT	.	.	.	.	.	.	.	0	.	.	0	.	.	.	.	.	.	.	.	.	.	.	.	.	.	.	.	.	0	1
1	1596839	AAAACGTTC.GACAGCGTT_R	T	G	.	.	NS=11;AF=0.133	GT	0	.	0	.	.	.	.	0	.	0	0	1	1	1	1	.	.	.	.	.	.	.	.	.	.	.	0	.	0	.
1	409645	AAAACGTTC.GACGAGCCG_R	A	C,T	.	.	NS=28;AF=0.033,0.267	GT	0	0	0	2	2	0	1	0	0	2	0	2	2	2	2	0	0	.	0	0	0	0	0	0	2	0	0	0	0	.
1	636473	AAAACGTTC.GCATCTTCG_R	A	G	.	.	NS=27;AF=0.100	GT	0	0	0	0	0	.	0	0	0	0	0	0	0	0	0	0	0	0	0	0	0	0	0	0	.	1	1	1	0	.
1	102473	AAAACGTTC.GGATGGCGT_F	G	C	.	.	NS=4;AF=0.033	GT	.	.	.	.	.	.	.	0	.	.	0	.	.	.	.	.	.	.	.	.	.	.	.	.	.	1	.	.	0	.
1	4684975	AAAACGTTG.CGATAAAGC_R	C	A	.	.	NS=9;AF=0.100	GT	0	0	0	.	.	.	.	0	.	.	0	.	.	.	.	.	.	.	.	.	.	.	.	.	.	1	1	1	0	.
1	379678	AAAACGTTG.TCTTTTCAC_R	A	G	.	.	NS=8;AF=0.033	GT	0	0	0	.	.	.	1	0	0	.	0	.	.	.	.	.	.	.	.	.	.	.	.	.	.	.	.	.	0	.
1	2046651	AAAACGTTT.ACCGATCTC_F	T	G	.	.	NS=29;AF=0.067	GT	0	0	0	0	0	0	0	0	0	0	0	0	0	0	0	0	0	0	0	0	1	1	0	.	0	0	0	0	0	0
1	3397454	AAAACGTTT.GTCAGGCTG_F	A	G	.	.	NS=16;AF=0.333	GT	.	.	1	1	1	.	1	0	.	1	0	1	1	1	1	.	.	.	.	.	.	.	.	.	1	0	0	0	0	.
1	282369	AAAACGTTT.GTCATGGAA_R	G	A,C	.	.	NS=20;AF=0.200,0.033	GT	0	0	1	1	1	1	0	0	0	0	0	0	0	0	0	.	.	.	.	.	.	.	.	.	0	.	1	1	0	2
1	2087040	AAAACTACG.GCGGCTGGA_R	G	A	.	.	NS=12;AF=0.033	GT	0	0	0	.	.	0	0	0	.	.	0	.	.	.	.	.	.	.	.	.	.	.	.	.	.	1	0	0	0	0
1	594919	AAAACTACT.AAGCACGTG_R	C	A	.	.	NS=27;AF=0.267	GT	0	0	0	1	1	1	0	0	0	1	0	1	1	1	1	0	0	0	0	0	0	0	0	0	.	0	0	.	0	.
1	207262	AAAACTATG.ATGCCAGTT_R	G	A	.	.	NS=21;AF=0.467	GT	0	0	0	.	.	.	.	1	0	.	0	1	1	1	1	1	0	1	1	1	1	1	1	1	1	.	.	.	0	.
1	4545945	AAAACTATT.GAACCGAGA_R	A	G	.	.	NS=28;AF=0.900	GT	1	1	1	1	1	1	1	1	1	1	0	1	1	1	1	1	.	1	1	1	1	1	1	1	1	1	1	1	1	.
1	509784	AAAACTCAA.ATCACCCCA_F	C	T	.	.	NS=5;AF=0.100	GT	1	1	1	.	.	.	.	0	.	.	0	.	.	.	.	.	.	.	.	.	.	.	.	.	.	.	.	.	.	.
1	2285202	AAAACTCAA.CATTATGTG_F	C	T	.	.	NS=29;AF=0.067	GT	0	0	0	0	0	0	0	0	1	1	0	0	0	0	0	0	0	0	0	0	0	0	0	0	0	0	0	0	0	.
1	1773747	AAAACTCAA.CGCGACCGT_F	C	T	.	.	NS=22;AF=0.067	GT	0	0	0	1	1	.	.	0	.	.	0	0	0	0	0	0	0	0	0	0	0	0	0	0	0	.	.	.	0	.
1	167614	AAAACTCAA.GAGATGCTG_R	A	G	.	.	NS=27;AF=0.067	GT	.	0	0	0	0	1	.	0	1	0	0	0	0	0	0	0	0	0	0	0	0	0	0	0	0	0	0	0	0	.
1	4163127	AAAACTCAC.CCGCGGACA_F	A	C	.	.	NS=8;AF=0.033	GT	.	.	.	0	0	.	.	0	.	0	0	.	.	.	.	.	.	.	.	.	.	.	.	.	.	0	1	.	0	.
1	728766	AAAACTCAC.GAAAGCTCA_R	T	G	.	.	NS=3;AF=0.033	GT	.	.	.	.	.	.	.	1	.	.	0	.	.	.	.	.	.	.	.	.	.	.	.	.	.	.	.	.	0	.
1	4100767	AAAACTCAC.GCCGCGGGC_R	A	G	.	.	NS=6;AF=0.033	GT	1	0	0	.	.	.	.	0	.	.	0	.	.	.	.	.	.	.	.	.	.	.	.	.	.	.	.	.	0	.
1	3237853	AAAACTCAC.GCTTTATCC_F	C	T	.	.	NS=7;AF=0.033	GT	.	.	.	.	.	.	.	0	.	.	0	1	0	0	.	.	.	.	.	.	.	.	.	.	0	.	.	.	0	.
1	4303078	AAAACTCAG.GCATATCGC_F	G	A	.	.	NS=30;AF=0.100	GT	0	0	0	1	1	0	0	0	0	1	0	0	0	0	0	0	0	0	0	0	0	0	0	0	0	0	0	0	0	0
1	2299648	AAAACTCAG.GCATGCTGT_R	G	T	.	.	NS=2;AF=0.033	GT	.	.	.	.	.	.	.	.	.	.	0	.	.	.	.	.	.	.	.	.	.	.	.	.	.	.	.	.	1	.
1	3277419	AAAACTCAG.GGCATCATC_F	G	A,C	.	.	NS=12;AF=0.167,0.033	GT	0	0	0	.	.	.	.	0	2	.	0	1	1	1	1	.	.	.	.	.	.	.	.	.	1	.	.	.	0	.
1	2051346	AAAACTCAT.AACTCAGTG_R	G	A	.	.	NS=30;AF=0.767	GT	1	1	1	1	1	0	1	0	1	1	0	1	1	1	1	1	1	1	1	1	1	1	1	1	1	0	0	0	0	1
1	1461022	AAAACTCAT.CCGGTGCAG_F	G	C	.	.	NS=2;AF=0.033	GT	.	.	.	.	.	.	.	.	.	.	0	.	.	.	.	.	.	.	.	.	.	.	.	.	.	.	.	.	.	1
1	1981938	AAAACTCAT.CTTCGCCTC_R	C	T	.	.	NS=28;AF=0.033	GT	0	0	0	0	0	.	0	0	1	0	0	0	0	0	0	0	0	0	0	0	0	0	0	0	0	0	0	0	0	.
1	55064	AAAACTCCT.ATTTCCTCC_R	A	T	.	.	NS=5;AF=0.100	GT	1	.	.	1	1	.	.	.	0	.	0	.	.	.	.	.	.	.	.	.	.	.	.	.	.	.	.	.	.	.
1	3015152	AAAACTCGA.GCACTGTAT_F	C	T	.	.	NS=17;AF=0.300	GT	.	.	.	.	.	.	.	0	0	.	0	0	.	0	0	1	1	1	1	1	1	1	1	1	0	.	.	.	0	.
1	1350138	AAAACTCGA.GGGTTGTAC_F	T	C	.	.	NS=14;AF=0.033	GT	0	0	0	.	.	.	1	0	0	0	0	0	0	0	0	.	.	.	.	.	.	.	.	.	0	.	.	.	0	.
1	4375678	AAAACTCGC.CCGAGCGGT_F	C	G	.	.	NS=5;AF=0.067	GT	.	.	.	1	1	.	.	0	.	.	0	.	.	.	.	.	.	.	.	.	.	.	.	.	.	.	.	.	0	.
1	642725	AAAACTCGC.GATGCGTTA_F	A	G	.	.	NS=7;AF=0.033	GT	.	0	0	.	.	1	.	0	.	.	0	.	.	.	.	.	.	.	.	.	.	.	.	.	.	.	.	.	0	0
1	3794779	AAAACTCGC.GGCAGCGGG_F	G	C	.	.	NS=9;AF=0.033	GT	.	0	0	.	.	.	.	1	.	.	0	.	.	.	.	0	.	.	.	.	0	0	0	.	.	.	.	.	0	.
1	957916	AAAACTCGG.ACCAGTGTG_F	T	C	.	.	NS=16;AF=0.033	GT	.	.	.	0	0	0	0	0	.	0	0	0	0	0	0	.	.	.	.	.	.	.	.	.	0	0	.	0	0	1
1	4229954	AAAACTCGG.CTGAACGAG_F	T	C	.	.	NS=12;AF=0.100	GT	0	0	0	1	1	.	.	0	.	1	0	.	.	.	.	.	.	.	.	.	.	.	.	.	.	0	0	0	0	.
1	3743818	AAAACTCGG.GAGTTTGTC_F	T	C	.	.	NS=13;AF=0.267	GT	1	1	.	0	0	.	0	0	.	1	0	1	1	1	1	.	.	.	.	.	.	.	.	.	1	.	.	.	.	.
1	4298558	AAAACTCTA.GAGTTTAGT_F	C	A	.	.	NS=23;AF=0.033	GT	.	.	.	0	0	0	.	0	0	0	0	0	0	0	0	0	0	0	0	0	0	0	0	0	0	.	.	.	0	1
1	985794	AAAACTCTC.CGCCTGAGC_F	G	C	.	.	NS=12;AF=0.367	GT	1	1	1	1	1	.	1	1	1	1	0	.	.	.	.	.	.	.	.	.	.	.	.	.	.	1	.	.	1	.
1	980069	AAAACTCTC.GATGTCGCC_R	G	A,C	.	.	NS=6;AF=0.067,0.033	GT	.	1	1	.	.	.	.	0	2	.	0	.	.	.	.	.	.	.	.	.	.	.	.	.	.	.	.	.	0	.
1	2832770	AAAACTCTC.GGCGGCGAA_F	T	C,G	.	.	NS=4;AF=0.033,0.033	GT	.	.	.	.	.	2	.	1	.	.	0	.	.	.	.	.	.	.	.	.	.	.	.	.	.	.	.	.	0	.
1	2357660	AAAACTCTC.GTCGAAGAG_R	C	G	.	.	NS=3;AF=0.033	GT	.	.	.	.	.	.	.	0	1	.	0	.	.	.	.	.	.	.	.	.	.	.	.	.	.	.	.	.	.	.
1	4553903	AAAACTCTC.TCGCGCCTC_R	G	A	.	.	NS=18;AF=0.333	GT	1	1	1	0	0	.	.	0	1	1	0	1	1	1	1	.	.	.	0	0	.	.	.	0	1	.	.	.	0	.
1	1654022	AAAACTCTG.GCAATAAAG_F	T	C	.	.	NS=15;AF=0.033	GT	0	0	0	0	0	.	.	1	0	0	0	0	0	0	0	.	.	.	.	.	.	.	.	.	0	.	.	.	0	.
1	4366658	AAAACTCTG.GGATCGCGG_F	C	G	.	.	NS=16;AF=0.033	GT	0	0	0	.	.	.	0	0	0	.	0	0	0	1	0	.	.	.	.	.	.	.	.	.	0	0	0	0	0	.
1	196519	AAAACTCTT.GAGATGATC_R	G	A	.	.	NS=13;AF=0.333	GT	1	1	1	.	.	1	.	0	1	.	0	1	1	1	1	.	.	.	.	.	.	.	.	.	1	.	.	.	0	.
1	4231795	AAAACTGAA.ACAACCGGC_F	C	T	.	.	NS=27;AF=0.467	GT	0	0	.	0	0	.	1	0	.	0	0	0	0	0	1	1	1	1	1	1	1	1	1	1	0	1	1	1	0	0
1	1652221	AAAACTGAA.ACCGCGTGG_F	T	C	.	.	NS=6;AF=0.067	GT	.	.	0	.	.	.	.	0	.	.	0	.	.	.	.	.	.	.	.	.	.	.	.	.	.	1	1	.	0	.
1	329399	AAAACTGAA.ACGCTGCCG_F	T	C	.	.	NS=13;AF=0.067	GT	1	.	.	.	.	.	.	0	.	1	0	.	.	.	.	0	0	0	0	0	0	0	0	.	.	.	.	.	0	.
1	2665723	AAAACTGAA.CTGTTTTTA_F	C	T	.	.	NS=26;AF=0.267	GT	.	.	.	0	0	0	1	0	0	0	0	0	0	0	0	1	1	0	0	0	1	1	0	0	0	1	1	1	0	.
1	525053	AAAACTGAA.GCTAATCCG_R	C	T	.	.	NS=4;AF=0.033	GT	.	.	.	.	.	.	.	0	1	.	0	.	.	.	.	.	.	.	.	.	.	.	.	.	.	.	.	.	0	.
1	1502482	AAAACTGAA.GGCGCGCTG_R	G	A	.	.	NS=21;AF=0.267	GT	0	0	0	0	0	.	0	0	.	0	0	0	0	.	.	1	.	1	1	1	1	1	1	1	.	.	.	0	0	.
1	343145	AAAACTGAA.GTCCCGGGC_F	A	G	.	.	NS=17;AF=0.067	GT	1	0	0	.	.	.	1	0	.	.	0	.	.	.	.	0	0	0	0	0	.	.	0	0	.	0	0	0	0	.
1	4695420	AAAACTGAA.TCTAACATC_F	A	G	.	.	NS=7;AF=0.100	GT	1	1	1	.	.	.	.	0	.	0	0	.	.	.	.	.	.	.	.	.	.	.	.	.	.	.	.	.	0	.
1	4166259	AAAACTGAC.AATGACCGT_F	A	G	.	.	NS=19;AF=0.367	GT	0	0	0	.	.	1	0	0	0	.	0	.	.	.	.	1	1	1	1	1	1	1	1	1	.	.	.	.	0	1
1	348142	AAAACTGAC.ACCCGTGGG_R	G	A	.	.	NS=16;AF=0.033	GT	.	.	.	.	.	.	.	0	.	0	0	0	.	.	0	0	0	0	0	0	0	0	0	1	0	.	.	.	0	.
1	1101024	AAAACTGAC.CAGGCGCGT_R	G	A,C	.	.	NS=11;AF=0.033,0.300	GT	2	2	2	.	.	.	2	2	.	.	0	.	.	.	.	.	.	.	.	.	.	.	.	.	.	2	2	2	2	1
1	854820	AAAACTGAC.CCCTCTTCC_R	T	C	.	.	NS=3;AF=0.033	GT	.	.	.	.	.	.	.	0	.	.	0	.	.	.	.	.	.	.	.	.	.	.	.	.	.	.	.	.	1	.
1	2616763	AAAACTGAC.GAGCCAGAC_R	G	A	.	.	NS=7;AF=0.033	GT	.	.	.	.	.	.	0	0	1	.	0	.	.	.	.	.	.	.	.	.	.	.	.	.	.	0	0	0	.	.
1	3379719	AAAACTGAC.GCCGAAGGC_F	C	T	.	.	NS=13;AF=0.367	GT	1	1	1	.	1	1	.	.	.	1	0	1	1	1	1	.	.	.	.	.	.	.	.	.	1	.	.	.	0	.
1	1364300	AAAACTGAC.GGCATTAAA_F	C	G	.	.	NS=22;AF=0.033	GT	0	0	0	.	.	.	.	0	1	.	0	0	0	0	0	0	0	0	.	.	0	0	0	0	0	0	0	0	0	.
1	3494148	AAAACTGAC.GGGTTTAGC_F	G	A	.	.	NS=14;AF=0.033	GT	0	0	0	.	.	.	.	0	.	.	0	.	.	.	.	0	0	.	0	0	0	0	0	0	.	.	.	.	1	.
1	3872574	AAAACTGAC.TTCCTCAGG_R	T	C	.	.	NS=29;AF=0.367	GT	.	0	0	0	0	0	0	0	1	0	0	0	0	0	0	1	1	1	1	1	1	1	1	1	0	0	0	0	0	1
1	1160590	AAAACTGAG.GAACAGCAG_F	C	T	.	.	NS=9;AF=0.033	GT	.	.	.	.	.	.	1	0	.	.	0	0	0	0	0	.	.	.	.	.	.	.	.	.	0	.	.	.	0	.
1	178047	AAAACTGAG.GCGGGAGTC_R	A	T	.	.	NS=4;AF=0.067	GT	.	.	.	.	.	.	.	.	.	.	0	.	.	.	.	.	.	.	.	.	.	.	.	.	.	1	.	1	0	.
1	4550629	AAAACTGAT.CAGTTCGGC_R	A	G	.	.	NS=26;AF=0.167	GT	0	0	0	0	0	0	0	0	0	0	0	1	1	1	1	.	.	0	0	0	0	0	.	0	1	0	0	0	0	.
1	3314392	AAAACTGAT.CGCCCGATG_R	A	G	.	.	NS=4;AF=0.033	GT	.	.	.	1	.	.	.	0	.	.	0	.	.	.	.	.	.	.	.	.	.	.	.	.	.	.	.	.	0	.
1	1859824	AAAACTGAT.CTTTCGTAT_R	C	T	.	.	NS=9;AF=0.100	GT	1	1	1	.	.	.	.	0	.	.	0	.	.	.	.	.	.	.	.	.	.	.	.	.	.	0	0	0	0	.
1	3813349	AAAACTGAT.GACGCTCTG_R	A	G	.	.	NS=12;AF=0.333	GT	.	.	.	.	.	1	.	.	.	.	0	.	.	.	.	1	1	1	1	1	1	1	1	1	.	.	.	.	0	.
1	1823551	AAAACTGAT.TCGATATCC_R	C	T	.	.	NS=18;AF=0.067	GT	.	.	.	.	.	.	.	0	.	.	0	.	1	0	.	0	0	0	0	0	0	0	0	0	1	0	0	0	0	.
1	323020	AAAACTGCA.AAAACCTGG_F	A	G	.	.	NS=15;AF=0.033	GT	.	0	0	0	.	1	.	0	.	.	0	0	0	0	0	.	.	.	.	.	.	.	.	.	0	0	0	0	0	.
1	809877	AAAACTGCA.AACTTCACC_F	G	A	.	.	NS=5;AF=0.033	GT	.	.	.	.	.	.	.	0	0	1	0	.	.	.	.	.	.	.	.	.	.	.	.	.	.	.	.	.	0	.
1	311985	AAAACTGCA.CTGTATCAA_F	C	T	.	.	NS=28;AF=0.033	GT	0	0	0	0	0	0	0	0	0	0	0	0	0	0	0	0	0	0	0	0	0	0	1	0	0	0	0	0	.	.
1	3603809	AAAACTGCA.GAAGAGCAG_F	T	C	.	.	NS=24;AF=0.767	GT	.	1	1	1	1	.	1	1	1	1	0	1	.	.	1	1	1	1	1	1	1	1	1	1	1	1	1	1	.	.
1	1750493	AAAACTGCA.GAATCCCAG_R	A	G	.	.	NS=15;AF=0.100	GT	.	.	.	1	1	.	1	0	0	.	0	0	0	0	0	.	.	.	.	.	.	.	.	.	0	0	0	0	0	.
1	4012390	AAAACTGCA.GACGTGAAA_F	C	T	.	.	NS=16;AF=0.333	GT	.	.	.	.	.	.	.	0	1	.	0	.	.	.	.	1	1	1	1	1	1	1	1	1	.	0	0	0	0	.
1	621648	AAAACTGCA.TCGCTGCTG_R	T	C	.	.	NS=6;AF=0.133	GT	1	1	1	.	.	.	1	0	.	.	0	.	.	.	.	.	.	.	.	.	.	.	.	.	.	.	.	.	.	.
1	325008	AAAACTGCC.ACTTATCAG_F	C	G	.	.	NS=21;AF=0.300	GT	.	.	.	1	1	.	1	0	.	1	0	1	1	1	1	0	0	0	0	0	0	0	0	0	1	.	.	.	0	.
1	3755828	AAAACTGCC.ATGAGCGTG_F	G	C	.	.	NS=11;AF=0.100	GT	.	.	.	1	1	.	.	0	.	1	0	0	0	0	0	.	.	.	.	.	.	.	.	.	0	.	.	.	0	.
1	1556571	AAAACTGCC.ATTTTCTCG_R	T	A,C	.	.	NS=5;AF=0.033,0.033	GT	.	2	.	.	.	.	1	0	.	.	0	.	.	.	.	.	.	.	.	.	.	.	.	.	.	.	.	.	0	.
1	2222912	AAAACTGCC.CCGGGTGAC_R	A	C	.	.	NS=5;AF=0.133	GT	.	.	.	1	1	.	.	1	.	.	0	.	.	.	.	.	.	.	.	.	.	.	.	.	.	.	.	.	1	.
1	1571509	AAAACTGCC.CTGAACTTC_R	A	T	.	.	NS=27;AF=0.033	GT	0	0	0	0	0	0	0	0	0	0	0	0	0	0	0	0	0	.	0	0	.	.	0	0	0	0	0	0	0	1
1	871005	AAAACTGCC.CTTTCGACG_F	G	A	.	.	NS=12;AF=0.033	GT	.	.	.	.	.	.	.	.	1	.	0	.	.	.	.	0	0	0	0	0	0	0	0	0	.	.	.	.	0	.
1	2779431	AAAACTGCC.GGGCCACGG_F	C	G	.	.	NS=3;AF=0.033	GT	.	.	.	.	.	.	.	0	.	.	0	.	.	.	.	.	.	.	.	.	.	.	.	.	.	.	.	.	.	1
1	1402663	AAAACTGCC.GGGCCGATC_F	G	C	.	.	NS=3;AF=0.033	GT	1	.	.	.	.	.	.	0	.	.	0	.	.	.	.	.	.	.	.	.	.	.	.	.	.	.	.	.	.	.
1	3353351	AAAACTGCC.TATCTGGCA_R	T	A	.	.	NS=22;AF=0.033	GT	0	0	0	.	.	.	1	.	0	.	0	0	0	0	0	0	0	0	0	0	0	0	0	0	0	.	.	0	0	.
1	4242422	AAAACTGCC.TCCGGCATC_F	C	T	.	.	NS=5;AF=0.133	GT	.	.	.	1	1	.	.	1	.	.	0	.	.	.	.	.	.	.	.	.	.	.	.	.	.	.	.	.	1	.
1	119949	AAAACTGCG.AACAGCATC_R	A	G	.	.	NS=9;AF=0.067	GT	0	0	0	.	.	.	0	0	1	.	0	.	.	.	.	.	.	.	.	.	.	.	.	.	.	.	.	1	0	.
1	54906	AAAACTGCG.CAGGACGAG_R	G	A	.	.	NS=3;AF=0.033	GT	0	.	.	.	.	1	.	.	.	.	0	.	.	.	.	.	.	.	.	.	.	.	.	.	.	.	.	.	.	.
1	1535325	AAAACTGCG.CATATCTTC_R	A	G	.	.	NS=12;AF=0.300	GT	.	.	.	.	.	.	.	0	.	.	0	.	.	.	.	1	1	1	1	1	1	1	1	1	.	.	.	.	0	.
1	4150276	AAAACTGCG.GAAGAGCTG_R	G	A	.	.	NS=30;AF=0.033	GT	0	0	0	0	0	0	0	0	0	0	0	0	0	0	0	0	0	0	0	0	0	0	0	0	0	0	0	0	0	1
1	1496003	AAAACTGCG.GACCGTATG_F	C	T	.	.	NS=18;AF=0.433	GT	.	.	0	.	.	.	.	0	.	.	0	.	1	1	1	1	1	1	1	1	1	1	1	1	1	.	.	.	0	0
1	183324	AAAACTGCG.GAGCTGTTC_F	T	C	.	.	NS=20;AF=0.233	GT	.	.	.	1	1	.	.	0	0	1	0	1	.	1	1	0	0	0	0	0	0	0	0	0	.	.	.	.	0	1
1	3788928	AAAACTGCG.GCCATGAAG_R	A	C,G	.	.	NS=9;AF=0.100,0.067	GT	.	.	.	1	1	.	.	2	.	1	0	.	.	.	.	.	.	.	.	.	.	.	.	.	.	0	0	0	2	.
1	2834855	AAAACTGCG.GGCGATGCG_R	G	A	.	.	NS=4;AF=0.033	GT	.	.	.	.	.	.	.	0	1	.	0	.	.	.	.	.	.	.	.	.	.	.	.	.	.	.	.	.	0	.
1	3727169	AAAACTGCG.TTATTCCTG_F	T	C	.	.	NS=27;AF=0.133	GT	0	0	0	0	0	0	0	0	0	0	0	1	1	1	1	0	0	0	0	0	0	0	0	0	.	0	0	.	0	.
1	830778	AAAACTGCT.AAAGATGGC_R	C	A,G	.	.	NS=26;AF=0.033,0.333	GT	0	0	0	0	1	0	0	0	2	0	0	0	0	0	0	2	2	2	2	2	2	2	2	2	.	.	.	0	0	.
1	1506713	AAAACTGCT.AACGACGCC_R	G	A	.	.	NS=8;AF=0.033	GT	.	.	1	.	.	.	.	.	.	.	0	0	0	0	0	.	.	.	.	.	.	.	.	.	0	.	.	.	0	.
1	363082	AAAACTGCT.ATCTCCCGC_R	G	C	.	.	NS=6;AF=0.033	GT	.	.	.	.	.	.	.	0	1	.	0	.	.	.	.	.	.	.	.	.	.	.	.	.	.	0	0	0	.	.
1	787305	AAAACTGCT.ATTCTCGAT_F	T	C	.	.	NS=2;AF=0.033	GT	.	.	.	.	.	.	.	.	.	.	0	.	.	.	.	.	.	.	.	.	.	.	.	.	.	.	.	.	1	.
1	3329849	AAAACTGCT.CAGGATGCG_R	G	C	.	.	NS=4;AF=0.100	GT	1	1	1	.	.	.	.	.	.	.	0	.	.	.	.	.	.	.	.	.	.	.	.	.	.	.	.	.	.	.
1	2555832	AAAACTGCT.CCTGGATTG_F	A	G	.	.	NS=2;AF=0.033	GT	.	.	.	.	.	.	.	.	.	.	0	.	.	.	.	.	.	.	.	.	.	.	.	.	.	.	.	.	1	.
1	705419	AAAACTGCT.CGTGAAGCG_R	A	C	.	.	NS=4;AF=0.033	GT	.	.	.	.	.	.	.	0	1	.	0	.	.	.	.	.	.	.	.	.	.	.	.	.	.	.	.	.	0	.
1	234095	AAAACTGCT.GCCAGCCGG_R	G	C	.	.	NS=6;AF=0.033	GT	.	.	.	.	.	.	.	0	.	.	0	.	.	.	.	.	.	.	.	.	.	.	.	.	.	0	1	0	0	.
1	656064	AAAACTGCT.GCGGTGGGC_F	G	T	.	.	NS=15;AF=0.133	GT	0	0	0	.	.	.	0	0	0	.	0	1	1	1	1	.	.	.	.	.	.	.	.	.	.	0	0	0	0	.
1	1595822	AAAACTGCT.TCCCTCGAA_F	T	C	.	.	NS=3;AF=0.033	GT	.	.	.	.	.	.	.	1	.	.	0	.	.	.	.	.	.	.	.	.	.	.	.	.	.	.	.	.	0	.
1	789933	AAAACTGGA.CCCCTACGA_R	T	G	.	.	NS=3;AF=0.033	GT	.	.	.	.	.	.	.	1	.	.	0	.	.	.	.	.	.	.	.	.	.	.	.	.	.	.	.	.	0	.
1	1261879	AAAACTGGA.CGCGTGGTG_F	G	A	.	.	NS=25;AF=0.333	GT	0	0	0	0	0	.	.	.	1	0	0	0	0	0	0	1	1	1	1	1	1	1	1	1	0	.	0	0	0	.
1	3279282	AAAACTGGA.GAGGCCGGG_R	C	T	.	.	NS=14;AF=0.033	GT	0	0	0	0	0	.	0	1	.	0	0	0	0	0	0	.	.	.	.	.	.	.	.	.	.	.	.	.	0	.
1	2419647	AAAACTGGA.GCAAACCGG_R	G	T	.	.	NS=5;AF=0.033	GT	.	.	.	.	.	.	.	0	1	.	0	.	.	.	.	.	.	.	.	.	.	.	.	.	.	.	0	.	0	.
1	3763571	AAAACTGGA.GCCCTGTTT_R	A	G	.	.	NS=15;AF=0.100	GT	0	0	.	1	1	.	0	0	0	1	0	0	0	0	0	.	.	.	.	.	.	.	.	.	0	.	.	.	0	.
1	3739396	AAAACTGGA.GGCACGGCG_R	A	G	.	.	NS=8;AF=0.033	GT	.	.	.	.	.	.	.	1	.	.	0	0	0	0	0	.	.	.	.	.	.	.	.	.	0	.	.	.	0	.
1	94134	AAAACTGGC.AAACAGCTC_R	C	A,T	.	.	NS=26;AF=0.167,0.033	GT	0	0	0	0	0	.	0	0	2	.	0	1	1	1	1	0	0	.	0	0	0	0	0	0	1	0	0	0	0	.
1	1114675	AAAACTGGC.AAAGACGAT_F	G	A	.	.	NS=25;AF=0.033	GT	0	0	0	.	.	.	.	0	1	0	0	0	0	0	0	0	0	0	0	0	0	0	0	0	0	0	0	0	0	.
1	4154078	AAAACTGGC.AACAAACCG_R	G	C	.	.	NS=3;AF=0.033	GT	.	.	.	.	.	.	.	1	.	.	0	.	.	.	.	.	.	.	.	.	.	.	.	.	.	.	.	.	0	.
1	2846126	AAAACTGGC.AACGCCGTG_F	C	G	.	.	NS=7;AF=0.067	GT	.	0	.	0	.	.	.	0	.	.	0	.	.	.	.	.	.	.	.	.	.	.	.	.	.	1	1	.	0	.
1	4479921	AAAACTGGC.ACCTGCGAC_F	C	G,T	.	.	NS=25;AF=0.267,0.100	GT	0	0	0	0	0	.	.	0	0	.	0	0	0	0	0	1	.	1	1	1	1	1	1	1	0	2	2	2	0	.
1	1712946	AAAACTGGC.AGCAGCACC_R	G	T	.	.	NS=11;AF=0.300	GT	.	.	.	.	.	.	.	0	.	.	0	.	.	.	.	1	1	1	1	1	1	1	1	1	.	.	.	.	.	.
1	50511	AAAACTGGC.AGCGGTCAG_R	G	C,T	.	.	NS=7;AF=0.167,0.033	GT	.	1	1	2	1	.	1	.	1	.	0	.	.	.	.	.	.	.	.	.	.	.	.	.	.	.	.	.	.	.
1	3255122	AAAACTGGC.ATTTTTGGC_F	G	C	.	.	NS=12;AF=0.033	GT	0	.	.	.	.	.	.	0	.	.	0	1	.	.	.	0	0	0	0	0	.	.	0	0	.	.	.	.	0	.
1	4368042	AAAACTGGC.CCGTACTAC_F	G	A	.	.	NS=8;AF=0.033	GT	0	.	.	.	.	.	0	0	.	.	0	.	.	.	.	.	.	.	.	.	.	.	.	.	.	0	0	0	1	.
1	4124822	AAAACTGGC.CCGTTCGCG_R	C	G	.	.	NS=13;AF=0.300	GT	.	.	.	.	.	.	.	0	.	.	0	.	.	.	.	1	1	1	1	1	1	1	1	1	.	0	.	.	0	.
1	2697696	AAAACTGGC.CTACGAGTG_R	C	A	.	.	NS=14;AF=0.033	GT	0	0	1	0	0	.	0	.	.	0	0	0	0	0	.	.	.	.	.	.	.	.	.	.	.	0	0	0	.	.
1	1107002	AAAACTGGC.CTGTTCTGG_F	G	C	.	.	NS=27;AF=0.300	GT	0	0	0	0	0	.	.	0	0	0	0	0	0	0	.	1	1	1	1	1	1	1	1	1	0	0	0	0	0	0
1	1040099	AAAACTGGC.GATGCACCA_F	T	C	.	.	NS=6;AF=0.133	GT	.	.	.	.	.	.	.	.	1	.	0	.	.	.	.	.	.	.	.	.	.	.	.	.	.	1	1	1	0	.
1	4481959	AAAACTGGC.GATTTTAGT_R	A	T	.	.	NS=16;AF=0.167	GT	0	0	0	.	.	.	.	0	0	.	0	1	1	1	1	.	.	.	.	.	.	.	.	.	1	0	0	0	0	0
1	2727945	AAAACTGGC.GCCTTTATC_F	T	C	.	.	NS=7;AF=0.033	GT	0	1	.	.	.	.	.	.	.	.	0	.	.	.	.	.	.	.	.	.	.	.	.	.	.	0	0	0	0	.
1	2441513	AAAACTGGC.GCGAAACAT_R	C	A,G	.	.	NS=11;AF=0.233,0.067	GT	.	.	.	.	.	.	.	.	.	.	0	.	.	.	.	2	2	1	1	1	1	1	1	1	.	.	.	.	0	.
1	2140106	AAAACTGGC.GCGAAATAC_F	C	A,G	.	.	NS=14;AF=0.033,0.367	GT	2	2	.	.	.	.	.	.	.	.	0	.	.	.	.	2	2	2	2	2	2	2	2	2	.	.	.	.	0	1
1	3132826	AAAACTGGC.GCGAAGTAT_R	G	A	.	.	NS=10;AF=0.167	GT	0	1	1	.	.	.	0	0	.	.	0	.	.	.	.	.	.	.	.	.	.	.	.	.	.	1	1	1	0	.
1	2082248	AAAACTGGC.GCGATGGAT_R	T	C	.	.	NS=6;AF=0.100	GT	.	.	.	1	.	.	.	0	.	.	0	.	.	.	.	.	.	.	.	.	.	.	.	.	.	1	1	.	0	.
1	3775087	AAAACTGGG.AATAAACTG_F	C	T	.	.	NS=12;AF=0.033	GT	0	0	0	.	.	0	0	.	.	.	0	.	1	0	0	.	.	.	.	.	.	.	.	.	0	0	.	.	0	.
1	3395723	AAAACTGGG.ATATTATGC_F	C	A,G,T	.	.	NS=27;AF=0.033,0.533,0.033	GT	2	2	2	.	.	1	0	0	2	3	0	0	0	0	0	2	2	2	2	2	2	2	2	2	0	2	2	2	0	.
1	1065749	AAAACTGGG.ATCAACCCG_F	C	T	.	.	NS=4;AF=0.033	GT	.	.	.	.	.	.	.	0	.	1	0	.	.	.	.	.	.	.	.	.	.	.	.	.	.	.	.	.	0	.
1	2845019	AAAACTGGG.ATGCCGCCG_F	C	T	.	.	NS=27;AF=0.400	GT	0	0	0	0	0	.	0	0	0	0	0	0	0	0	0	1	1	1	1	1	1	1	1	1	0	1	1	.	1	.
1	2358822	AAAACTGGG.ATTGGCAGC_R	C	A,G	.	.	NS=4;AF=0.033,0.033	GT	.	.	.	.	.	.	.	0	1	.	0	.	.	.	.	.	.	.	.	.	.	.	.	.	.	.	.	.	2	.
1	2236391	AAAACTGGG.GCACTGGGG_R	T	G	.	.	NS=13;AF=0.333	GT	.	.	0	.	.	.	.	0	.	.	0	.	.	.	.	1	1	1	1	1	1	1	1	1	.	.	.	.	.	1
1	1312142	AAAACTGGG.GCTGGTCGA_R	C	G	.	.	NS=15;AF=0.200	GT	0	0	0	.	.	.	1	0	.	.	0	1	1	1	1	.	.	.	.	.	.	.	.	.	1	0	0	0	0	.
1	3878275	AAAACTGGT.AACTCCCAG_F	T	C,G	.	.	NS=7;AF=0.033,0.033	GT	.	.	.	0	0	2	.	0	.	.	0	.	.	.	.	.	.	.	.	.	.	.	.	.	.	.	.	.	0	1
1	1559855	AAAACTGGT.AGTAATGCA_R	C	G,T	.	.	NS=29;AF=0.033,0.033	GT	0	0	0	0	0	2	0	0	1	0	0	0	0	0	0	0	0	0	0	0	0	0	0	0	0	0	0	0	0	.
1	3465335	AAAACTGGT.CACATCCCC_R	C	A	.	.	NS=16;AF=0.033	GT	.	.	.	0	0	.	1	0	0	0	0	0	0	0	0	.	.	.	.	.	.	.	.	.	0	0	0	0	0	.
1	2431693	AAAACTGGT.CACATTCCC_R	G	T	.	.	NS=7;AF=0.133	GT	1	1	1	.	.	.	.	0	1	.	0	.	.	.	.	.	.	.	.	.	.	.	.	.	.	.	.	.	0	.
1	4617525	AAAACTGGT.CCGGCGGCA_R	A	G	.	.	NS=20;AF=0.500	GT	0	0	0	.	.	.	1	0	.	.	0	1	1	1	1	1	1	1	1	1	1	1	.	1	1	.	.	.	1	.
1	4312189	AAAACTGGT.GAGCGCAGC_F	A	C,T	.	.	NS=11;AF=0.233,0.033	GT	.	.	.	.	.	.	.	0	.	.	0	.	.	.	.	1	1	2	1	1	1	1	1	.	.	.	.	.	0	.
1	4175021	AAAACTGGT.GATAAACTG_R	G	C	.	.	NS=17;AF=0.167	GT	0	0	0	.	.	.	.	0	0	.	0	1	1	1	1	0	.	0	0	0	.	.	.	0	1	.	.	.	0	.
1	22113	AAAACTGGT.GTGGATGCC_F	G	A,T	.	.	NS=24;AF=0.300,0.033	GT	0	0	0	0	0	.	.	0	0	2	0	.	.	0	0	1	1	1	1	1	1	1	1	1	.	0	0	0	0	.
1	2127080	AAAACTGTA.GTCACCTTC_R	G	A	.	.	NS=8;AF=0.033	GT	.	0	0	.	.	.	.	0	.	0	0	.	.	.	.	.	.	.	.	.	.	.	.	.	.	1	0	.	0	.
1	2113905	AAAACTGTC.GTTGCGATG_R	G	A	.	.	NS=13;AF=0.200	GT	1	0	0	.	.	.	0	.	.	.	0	1	1	1	1	.	.	.	.	.	.	.	.	.	1	0	.	0	0	.
1	4237788	AAAACTGTC.TTATTCATT_F	G	A	.	.	NS=6;AF=0.033	GT	.	0	.	.	.	.	1	0	0	.	0	.	.	.	.	.	.	.	.	.	.	.	.	.	.	.	.	.	0	.
1	169527	AAAACTGTG.GTGATTGGC_R	G	A	.	.	NS=6;AF=0.033	GT	.	.	.	0	0	.	.	0	1	.	0	.	.	.	.	.	.	.	.	.	.	.	.	.	.	.	.	.	0	.
1	4261555	AAAACTGTT.AATTCAGAA_F	T	C	.	.	NS=4;AF=0.033	GT	.	.	.	.	.	.	.	.	1	0	0	.	.	.	.	.	.	.	.	.	.	.	.	.	.	.	.	.	0	.
1	1704799	AAAACTGTT.ATTGCACTG_F	A	G,T	.	.	NS=12;AF=0.100,0.033	GT	.	.	.	2	0	.	1	0	.	0	0	1	.	.	1	.	.	.	.	.	.	.	.	.	.	0	0	0	0	.
1	2561275	AAAACTGTT.GCTTCACCG_R	C	A	.	.	NS=4;AF=0.033	GT	.	.	.	.	.	.	.	0	1	.	0	.	.	.	.	.	.	.	.	.	.	.	.	.	.	.	.	.	0	.
1	2952481	AAAACTTGT.GCCGCAGGG_R	G	A	.	.	NS=2;AF=0.033	GT	.	.	.	.	.	.	.	.	.	.	0	.	.	.	.	.	.	.	.	.	.	.	.	.	.	.	.	.	1	.
1	1381253	AAAACTTTA.GACTGGTTT_F	T	C	.	.	NS=8;AF=0.167	GT	.	1	1	.	.	.	.	0	.	.	0	.	.	.	.	.	.	.	.	.	.	.	.	.	.	1	1	1	0	.
1	2692449	AAAACTTTA.GGGTTCCCT_R	T	C	.	.	NS=5;AF=0.100	GT	.	.	.	.	.	.	.	0	.	.	0	1	1	.	.	.	.	.	.	.	.	.	.	.	1	.	.	.	.	.
1	3160346	AAAACTTTT.TTATTTAAC_F	T	C	.	.	NS=29;AF=0.033	GT	0	0	0	0	0	0	0	0	0	0	0	0	0	0	0	0	0	0	0	0	0	0	0	0	0	0	0	0	.	1
1	354467	AAAAGAAAA.AATGGGTGC_F	G	A	.	.	NS=9;AF=0.200	GT	.	.	.	1	1	.	.	0	.	1	0	.	.	.	.	.	.	.	.	.	.	.	.	.	.	1	1	1	0	.
1	1150275	AAAAGAAAA.ACCTTTGCC_F	A	G	.	.	NS=16;AF=0.033	GT	.	0	0	.	.	.	1	0	0	.	0	.	.	.	.	0	0	0	0	0	0	0	0	0	.	.	.	.	0	.
1	762484	AAAAGAAAA.ATCGGCTAC_R	C	T	.	.	NS=5;AF=0.067	GT	.	.	1	.	.	.	1	0	.	.	0	.	.	.	.	.	.	.	.	.	.	.	.	.	.	.	.	.	0	.
1	1599660	AAAAGAAAA.CTGCTTTTC_F	C	T	.	.	NS=3;AF=0.033	GT	.	.	.	.	.	.	.	1	.	.	0	.	.	.	.	.	.	.	.	.	.	.	.	.	.	.	.	.	0	.
1	964911	AAAAGAAAC.CTGCAAATT_R	T	C	.	.	NS=4;AF=0.033	GT	1	.	.	.	.	.	.	0	0	.	0	.	.	.	.	.	.	.	.	.	.	.	.	.	.	.	.	.	.	.
1	276818	AAAAGAAAC.CTGGTGGCA_R	C	T	.	.	NS=21;AF=0.367	GT	0	0	0	.	.	0	.	0	1	.	0	.	.	.	.	1	1	1	1	1	1	1	1	1	.	0	0	0	0	1
1	2749604	AAAAGAAAT.GATCGCATC_F	A	T	.	.	NS=2;AF=0.033	GT	.	.	.	.	.	.	.	.	.	.	0	.	.	.	.	.	.	.	.	.	.	.	.	.	.	.	.	.	.	1
1	2285283	AAAAGAACA.CACAATAAA_F	A	T	.	.	NS=11;AF=0.033	GT	0	0	0	.	.	.	1	0	0	.	0	.	.	.	.	.	.	.	.	.	.	.	.	.	.	0	0	0	0	.
1	410247	AAAAGAACG.ATGGCGCAG_R	A	G	.	.	NS=27;AF=0.167	GT	0	0	0	0	0	0	0	0	0	0	0	1	1	1	1	0	0	0	.	.	0	0	0	0	1	0	0	0	0	.
1	724330	AAAAGAACG.CAATAAAAG_R	T	C	.	.	NS=3;AF=0.033	GT	.	.	.	.	.	.	.	0	.	.	0	.	.	.	.	.	.	.	.	.	.	.	.	.	.	.	.	.	1	.
1	2774943	AAAAGAACG.CTGCAAATT_F	T	C	.	.	NS=12;AF=0.067	GT	0	0	0	1	1	.	.	0	.	0	0	.	.	.	.	.	.	.	.	.	.	.	.	.	.	0	0	0	0	.
1	2395141	AAAAGAACG.GCAGGGCGT_R	G	T	.	.	NS=21;AF=0.133	GT	0	.	.	1	1	1	0	0	0	1	0	.	.	.	.	0	0	0	0	0	0	0	0	0	.	0	.	0	0	.
1	213825	AAAAGAACG.GGGCTGATG_R	G	A	.	.	NS=13;AF=0.033	GT	1	0	0	0	0	.	.	0	0	0	0	.	.	.	.	.	.	.	.	.	.	.	.	.	.	0	0	0	0	.
1	3552798	AAAAGAACG.TGAGGCGAA_F	T	C	.	.	NS=17;AF=0.233	GT	0	0	0	1	1	.	0	.	0	1	0	1	1	1	1	.	.	.	.	.	.	.	.	.	.	0	0	0	0	.
1	1155711	AAAAGAACT.TGCCTCAGC_F	A	C,G	.	.	NS=15;AF=0.133,0.033	GT	0	0	0	.	.	.	2	0	0	.	0	1	.	1	1	.	.	.	.	.	.	.	.	.	1	0	0	0	0	.
1	702997	AAAAGAAGA.AATGGACTG_R	C	T	.	.	NS=29;AF=0.033	GT	0	0	0	1	0	0	0	0	0	0	0	0	0	0	0	0	0	0	0	0	0	0	0	0	.	0	0	0	0	0
1	3800694	AAAAGAAGA.CGTTTCCGC_R	C	A	.	.	NS=8;AF=0.233	GT	.	.	.	.	.	.	.	.	.	.	0	.	.	.	.	1	1	.	1	1	1	1	1	.	.	.	.	.	.	.
1	1631006	AAAAGAAGA.CTTCTTGCC_R	G	A	.	.	NS=30;AF=0.633	GT	1	1	1	1	1	0	1	1	1	1	0	1	1	1	1	0	0	0	0	0	0	0	0	0	1	1	1	1	1	1
1	2285165	AAAAGAAGA.GAGACGATC_F	G	A	.	.	NS=18;AF=0.067	GT	0	0	0	.	.	.	.	0	.	.	0	.	.	.	.	0	0	0	1	1	0	0	0	0	.	0	0	0	0	.
1	330229	AAAAGAAGA.GATCACAAA_R	G	T	.	.	NS=27;AF=0.300	GT	0	0	0	0	0	0	.	0	.	0	0	0	0	0	0	1	1	1	1	1	1	1	1	1	0	0	0	0	0	.
1	2005010	AAAAGAAGC.GCAATAATA_F	C	G	.	.	NS=25;AF=0.300	GT	1	1	1	.	.	.	1	0	0	.	0	1	1	1	1	0	0	0	0	0	0	0	0	0	1	0	0	0	0	.
1	501966	AAAAGAAGC.TTTCTGTTC_F	C	G	.	.	NS=9;AF=0.167	GT	1	0	1	.	.	.	.	0	.	.	0	.	.	.	.	.	.	.	.	.	.	.	.	.	.	1	1	1	0	.
1	1653516	AAAAGAAGG.CAGAATTTC_R	T	A,C,G	.	.	NS=8;AF=0.033,0.133,0.033	GT	1	2	2	.	.	.	.	.	3	.	0	.	.	.	.	.	.	.	.	.	.	.	.	.	.	2	.	2	0	.
1	847253	AAAAGAAGG.CTGGAAGAG_F	T	C	.	.	NS=6;AF=0.067	GT	0	1	1	.	.	.	.	0	.	.	0	.	.	.	.	.	.	.	.	.	.	.	.	.	.	.	.	.	0	.
1	2888109	AAAAGAAGG.GGCGTGCCC_F	G	C	.	.	NS=7;AF=0.133	GT	.	.	.	.	.	.	1	0	.	.	0	.	.	.	.	.	.	.	.	.	.	.	.	.	.	1	1	1	0	.
1	2167402	AAAAGAAGG.GGCTTTGCG_R	A	G	.	.	NS=2;AF=0.033	GT	.	.	.	.	.	.	.	1	.	.	0	.	.	.	.	.	.	.	.	.	.	.	.	.	.	.	.	.	.	.
1	2192184	AAAAGAAGG.GTGCTCAGC_R	G	A	.	.	NS=3;AF=0.033	GT	.	.	.	.	.	.	.	0	.	.	0	.	.	.	.	.	.	.	.	.	.	.	.	.	.	.	.	.	1	.
1	768478	AAAAGAAGT.AACGTGCCT_F	G	C	.	.	NS=17;AF=0.300	GT	.	0	.	.	.	.	.	0	.	.	0	0	0	0	0	1	1	1	1	1	1	1	1	1	.	.	.	.	0	.
1	2912788	AAAAGAAGT.GATGATGCC_F	T	C	.	.	NS=19;AF=0.033	GT	0	0	0	0	0	0	0	0	0	.	0	0	0	1	0	.	.	.	.	.	.	.	.	.	0	0	0	0	0	.
1	3461099	AAAAGAAGT.TGGTCTGTT_R	C	G	.	.	NS=8;AF=0.167	GT	.	.	.	.	.	.	.	0	.	.	0	1	1	1	1	.	.	.	.	.	.	.	.	.	1	.	.	.	0	.
1	655412	AAAAGAATA.AGCACAGAC_F	C	G	.	.	NS=26;AF=0.033	GT	.	.	0	0	0	1	0	0	0	0	0	0	0	0	0	0	0	0	0	0	0	0	0	0	.	0	0	0	0	.
1	878771	AAAAGAATA.TAAATCAAA_R	T	A	.	.	NS=6;AF=0.100	GT	.	.	.	.	.	.	.	0	.	.	0	.	1	1	.	.	.	.	.	.	.	.	.	.	.	.	.	1	0	.
1	1781289	AAAAGAATA.TGAAGTCAT_R	C	T	.	.	NS=10;AF=0.033	GT	.	.	.	0	.	0	.	0	0	.	0	.	.	.	.	.	.	.	.	.	.	.	.	.	.	0	0	0	0	1
1	2213779	AAAAGAATC.ATAATCGCA_F	A	G,T	.	.	NS=21;AF=0.100,0.300	GT	0	.	0	1	1	.	.	.	1	.	0	0	0	0	0	2	2	2	2	2	2	2	2	2	0	.	.	.	0	.
1	3877576	AAAAGAATG.TCCATGTAC_R	C	G	.	.	NS=30;AF=0.567	GT	1	1	1	0	0	0	1	0	1	0	0	0	0	0	0	1	1	1	1	1	1	1	1	1	0	1	1	1	0	0
1	1737454	AAAAGAATT.CTGCTTTGA_F	A	T	.	.	NS=3;AF=0.033	GT	.	.	.	.	.	.	.	0	.	.	0	.	.	.	.	.	.	.	.	.	.	.	.	.	.	.	.	.	1	.
1	4014101	AAAAGACAA.AAAAAAGCC_R	G	T	.	.	NS=3;AF=0.067	GT	.	.	.	.	.	.	.	.	.	.	0	.	.	.	.	.	.	.	.	.	1	1	.	.	.	.	.	.	.	.
1	1119985	AAAAGACAA.ATCGGCTTC_R	A	G	.	.	NS=12;AF=0.200	GT	.	.	.	.	.	.	.	0	.	1	0	1	1	1	1	.	.	.	.	.	.	.	.	.	1	0	0	0	0	.
1	1986196	AAAAGACAA.CAGGACCTG_R	C	T	.	.	NS=10;AF=0.167	GT	1	1	1	.	.	.	1	0	.	.	0	.	.	.	.	.	.	.	.	.	.	.	.	.	.	1	0	0	0	.
1	3508525	AAAAGACAA.GCGACGCGC_F	T	C	.	.	NS=6;AF=0.067	GT	.	1	1	.	.	.	0	0	.	.	0	.	.	.	.	.	.	.	.	.	.	.	.	.	.	.	.	.	0	.
1	4636486	AAAAGACAA.TTCCCGTAT_F	G	A	.	.	NS=14;AF=0.067	GT	.	.	.	.	.	.	.	0	.	.	0	.	1	.	.	0	0	0	0	0	0	0	0	0	1	.	.	.	0	.
1	3039434	AAAAGACAC.AAGCAGCTG_R	C	G	.	.	NS=4;AF=0.033	GT	.	.	.	.	.	.	.	0	.	.	0	.	.	1	.	.	.	.	.	.	.	.	.	.	.	.	.	.	0	.
1	96366	AAAAGACAC.ACCGCGCGT_R	G	A	.	.	NS=16;AF=0.100	GT	.	0	0	.	.	.	0	0	0	0	0	0	0	0	0	.	.	.	.	.	.	.	.	.	0	1	1	1	0	.
1	316192	AAAAGACAC.ATCGGCGAC_R	G	C	.	.	NS=4;AF=0.033	GT	.	.	.	.	.	.	.	0	1	.	0	.	.	.	.	.	.	.	.	.	.	.	.	.	.	.	.	.	0	.
1	119118	AAAAGACAC.CTGCGCCCG_R	G	A	.	.	NS=6;AF=0.033	GT	1	.	.	0	0	.	.	0	.	.	0	.	.	.	.	.	.	.	.	.	.	.	.	.	.	.	.	.	0	.
1	24027	AAAAGACAG.CATCTGCCG_R	G	A	.	.	NS=13;AF=0.133	GT	0	0	0	.	.	.	0	0	.	0	0	1	1	.	1	.	.	.	.	.	.	.	.	.	1	.	.	.	0	0
1	4030058	AAAAGACAT.GAGCAGTTA_R	G	A	.	.	NS=3;AF=0.067	GT	.	.	.	.	.	.	.	.	.	.	0	1	.	.	.	.	.	.	.	.	.	.	.	.	.	1	.	.	.	.
1	1061801	AAAAGACAT.TACCTGTAC_F	T	C	.	.	NS=27;AF=0.033	GT	0	0	0	.	0	1	0	0	0	0	0	0	0	0	0	0	0	0	0	0	0	0	0	0	.	0	0	0	0	.
1	1620691	AAAAGACCA.AATGTCTAA_R	A	C	.	.	NS=8;AF=0.167	GT	.	.	.	.	.	.	.	0	.	.	0	1	1	1	1	.	.	.	.	.	.	.	.	.	1	.	.	.	0	.
1	4639229	AAAAGACCC.AAAGTTGAA_F	G	C	.	.	NS=4;AF=0.033	GT	.	.	.	.	.	.	1	0	.	.	0	.	.	.	.	.	.	.	.	.	.	.	.	.	.	.	.	.	0	.
1	2341497	AAAAGACCC.AGCGTTAAA_F	C	A	.	.	NS=20;AF=0.300	GT	.	.	.	.	.	.	.	0	.	0	0	0	0	0	.	1	1	1	1	1	1	1	1	1	0	0	0	0	0	.
1	1161726	AAAAGACCC.CCACGGCGG_R	C	T	.	.	NS=20;AF=0.033	GT	1	0	0	.	.	.	0	.	0	.	0	0	0	0	0	0	0	0	0	0	0	0	0	0	0	.	.	.	.	.
1	4209263	AAAAGACCG.GACGCCAGC_R	C	A,G	.	.	NS=13;AF=0.300,0.033	GT	.	.	.	.	.	2	.	0	.	.	0	.	.	.	.	1	1	1	1	1	1	1	1	1	.	.	.	.	0	.
1	3360803	AAAAGACCT.ATCACCGTT_F	G	C	.	.	NS=7;AF=0.033	GT	0	.	.	.	.	.	1	0	.	.	0	.	.	.	.	0	.	0	.	.	.	.	.	.	.	.	.	.	0	.
1	1131569	AAAAGACCT.GCTGCCGCA_R	A	C,G	.	.	NS=8;AF=0.033,0.167	GT	.	.	.	.	.	.	1	.	.	.	0	2	2	2	2	.	.	.	.	.	.	.	.	.	2	.	.	.	0	.
1	3452745	AAAAGACGA.ACCGCCCAG_F	T	C	.	.	NS=18;AF=0.300	GT	1	1	1	0	0	.	0	0	0	.	0	1	1	1	1	.	.	.	.	.	.	.	.	.	1	1	0	0	0	.
1	2338357	AAAAGACGA.GTCGCCCTG_F	G	A	.	.	NS=6;AF=0.067	GT	.	1	.	0	.	.	1	0	.	0	0	.	.	.	.	.	.	.	.	.	.	.	.	.	.	.	.	.	.	.
1	1764114	AAAAGACGA.TTCTAGCGA_R	C	T	.	.	NS=15;AF=0.300	GT	0	0	.	.	.	.	0	0	0	.	0	.	.	.	.	1	1	1	1	1	1	1	1	1	.	.	.	.	.	.
1	1138778	AAAAGACGC.GCGCGCTGG_R	A	G	.	.	NS=12;AF=0.300	GT	1	1	1	1	1	.	.	0	.	1	0	.	.	.	.	.	.	.	.	.	.	.	.	.	.	1	1	1	0	.
1	3439398	AAAAGACGC.GTTTTGCGT_F	G	T	.	.	NS=28;AF=0.033	GT	0	0	0	0	0	.	1	0	0	0	0	0	0	0	0	0	0	0	0	0	0	0	0	0	0	0	0	0	0	.
1	1310005	AAAAGACGC.TACCTGATT_R	G	A	.	.	NS=10;AF=0.200	GT	1	.	.	1	1	.	1	.	1	.	0	.	.	.	.	.	.	.	.	.	.	.	.	.	.	0	1	0	0	.
1	3659806	AAAAGACGG.AAGCGCCTG_R	A	G,T	.	.	NS=19;AF=0.100,0.100	GT	.	.	1	2	2	1	1	0	.	2	0	.	.	.	.	0	0	0	0	0	0	0	0	0	.	0	.	.	0	.
1	856716	AAAAGACGG.ACCTGGGTG_F	A	C,T	.	.	NS=13;AF=0.233,0.100	GT	1	1	1	2	2	.	1	0	2	.	0	.	.	.	.	.	.	.	.	.	.	.	.	.	.	1	1	1	0	.
1	3460220	AAAAGACGG.ACGCTGTAC_R	G	A	.	.	NS=30;AF=0.200	GT	0	0	0	0	0	0	0	0	0	0	0	1	1	1	1	0	0	0	0	0	0	0	0	0	1	0	0	0	0	1
1	2898287	AAAAGACGG.AGCCTGAAG_R	G	A	.	.	NS=13;AF=0.100	GT	.	.	.	.	.	0	0	0	.	.	0	0	0	0	0	.	.	.	.	.	.	.	.	.	0	1	1	1	0	.
1	2456034	AAAAGACGG.CCAGAGCTG_F	T	C,G	.	.	NS=9;AF=0.033,0.200	GT	2	2	2	.	.	.	.	1	.	.	0	.	.	.	.	.	.	.	.	.	.	.	.	.	.	2	2	2	0	.
1	3696859	AAAAGACGG.GAAAAACAG_R	G	A	.	.	NS=11;AF=0.133	GT	0	0	0	.	.	.	0	0	1	.	0	.	.	.	.	.	.	.	.	.	.	.	.	.	.	1	1	1	0	.
1	3557579	AAAAGACGG.GCTATGTGG_R	G	A	.	.	NS=30;AF=0.033	GT	0	0	0	0	0	0	0	0	0	0	0	1	0	0	0	0	0	0	0	0	0	0	0	0	0	0	0	0	0	0
1	2187755	AAAAGACGG.TCGGGCAGC_F	A	G	.	.	NS=2;AF=0.033	GT	.	.	.	.	.	.	1	.	.	.	0	.	.	.	.	.	.	.	.	.	.	.	.	.	.	.	.	.	.	.
1	2934714	AAAAGACGG.TCTGCGGTC_R	A	G	.	.	NS=3;AF=0.033	GT	.	.	.	.	.	.	.	1	.	.	0	.	.	.	.	.	.	.	.	.	.	.	.	.	.	.	.	.	0	.
1	3417170	AAAAGACGG.TTTATCACC_F	G	T	.	.	NS=5;AF=0.067	GT	.	.	.	.	.	1	.	0	.	.	0	.	.	.	.	.	.	.	.	.	.	.	.	.	.	.	.	.	0	1
1	58365	AAAAGACGG.TTTGCCCTC_F	A	G	.	.	NS=9;AF=0.067	GT	.	0	0	1	1	.	.	.	.	.	0	.	.	.	.	.	.	.	.	.	.	.	.	.	.	0	0	0	0	.
1	841973	AAAAGACGT.ATGGCTCAG_F	A	T	.	.	NS=26;AF=0.233	GT	0	0	0	1	1	.	0	0	0	1	0	1	1	1	1	0	0	.	0	0	0	0	.	0	.	0	0	0	0	0
1	3739054	AAAAGACGT.CGCCATATC_R	C	A	.	.	NS=10;AF=0.100	GT	0	0	0	.	.	1	.	0	.	.	0	.	.	.	.	.	.	.	.	.	.	.	.	.	.	1	1	.	0	0
1	3780986	AAAAGACGT.GTGCTGCAA_R	C	A	.	.	NS=11;AF=0.067	GT	0	1	1	0	0	.	0	0	0	0	0	.	.	.	.	.	.	.	.	.	.	.	.	.	.	.	.	.	0	.
1	2639495	AAAAGACGT.GTTTTTCAC_F	G	T	.	.	NS=25;AF=0.167	GT	0	0	0	0	0	.	0	0	.	0	0	1	1	1	1	0	0	0	0	0	0	0	0	0	1	0	.	.	0	.
1	2247520	AAAAGACTC.ATGAGCAAA_R	T	C	.	.	NS=15;AF=0.367	GT	.	.	.	1	1	.	0	0	.	1	0	1	1	1	1	.	.	.	.	.	.	.	.	.	1	1	1	1	0	.
1	1823452	AAAAGACTG.GCCGCCGGC_R	C	T	.	.	NS=5;AF=0.033	GT	.	.	.	.	.	.	.	0	.	.	0	.	.	.	.	.	.	.	.	.	.	.	.	.	.	0	.	0	1	.
1	680002	AAAAGACTG.GCGGTCTAT_F	C	T	.	.	NS=14;AF=0.100	GT	.	0	0	.	.	.	.	0	0	0	0	0	0	0	0	.	.	.	.	.	.	.	.	.	.	1	1	1	0	.
1	1231095	AAAAGACTG.TAAACATGA_F	T	A	.	.	NS=21;AF=0.300	GT	.	.	.	.	.	.	.	0	0	.	0	0	0	0	0	1	1	1	1	1	1	1	1	1	0	0	0	0	0	.
1	2222873	AAAAGACTT.ATCACCTTC_R	A	G	.	.	NS=15;AF=0.333	GT	.	1	.	.	.	.	0	0	.	.	0	.	.	.	.	1	1	1	1	1	1	1	1	1	.	0	.	.	0	.
1	1380393	AAAAGAGAA.AACGTCGAG_F	C	A,G	.	.	NS=21;AF=0.367,0.267	GT	1	1	1	1	1	.	1	0	.	1	0	.	.	.	.	2	2	2	2	2	2	2	2	.	.	1	1	1	.	1
1	1044762	AAAAGAGAA.AAGCAGCGC_R	G	A	.	.	NS=6;AF=0.033	GT	.	.	.	1	.	.	0	0	0	.	0	.	.	.	.	.	.	.	.	.	.	.	.	.	.	.	.	.	0	.
1	467311	AAAAGAGAA.AATGCCAAC_R	T	C	.	.	NS=25;AF=0.033	GT	0	0	0	.	.	.	.	0	0	1	0	0	0	0	0	0	0	0	0	0	0	0	0	0	0	0	0	0	0	.
1	4573133	AAAAGAGAA.ACCCGGCGT_R	T	C	.	.	NS=30;AF=0.033	GT	0	0	0	0	0	0	0	0	0	0	0	0	0	0	0	0	0	0	0	0	0	0	0	0	0	0	0	1	0	0
1	853283	AAAAGAGAA.AGCTCAATC_R	G	A	.	.	NS=22;AF=0.033	GT	0	0	0	1	0	.	.	0	.	0	0	0	0	0	0	0	0	0	0	0	0	0	0	0	.	.	.	.	0	.
1	1603947	AAAAGAGAA.AGGTTGAGT_F	G	T	.	.	NS=2;AF=0.033	GT	.	.	.	.	.	.	.	.	.	.	0	.	.	.	.	.	.	.	.	.	.	.	.	.	.	.	.	.	1	.
1	688490	AAAAGAGAA.ATACTTCTT_R	C	G	.	.	NS=3;AF=0.067	GT	.	.	.	.	.	.	.	1	.	.	0	.	.	.	.	.	.	.	.	.	.	.	.	.	.	.	.	.	1	.
1	296713	AAAAGAGAA.ATCGACTTC_F	T	C	.	.	NS=14;AF=0.300	GT	1	0	0	.	1	.	1	0	.	1	0	1	1	1	1	.	.	.	.	.	.	.	.	.	1	.	.	.	0	.
1	130907	AAAAGAGAA.CCGACAATC_F	G	A	.	.	NS=3;AF=0.033	GT	.	.	.	.	.	.	.	1	.	.	0	.	.	.	.	.	.	.	.	.	.	.	.	.	.	.	.	.	0	.
1	3525552	AAAAGAGAA.CCGCGCGTG_F	G	A	.	.	NS=18;AF=0.167	GT	1	1	.	0	0	0	0	0	.	.	0	.	.	.	.	0	0	0	.	.	0	0	.	0	.	1	1	1	0	.
1	1895777	AAAAGAGAA.CCGGTGCTG_R	A	C	.	.	NS=25;AF=0.133	GT	1	1	1	.	0	.	1	0	0	.	0	0	0	0	.	0	0	0	0	0	0	0	0	0	0	0	0	0	0	.
1	2776356	AAAAGAGAA.CCGTTTTGA_R	G	A	.	.	NS=17;AF=0.333	GT	0	0	0	.	.	.	1	0	0	.	0	.	.	.	.	1	1	1	1	1	1	1	1	1	.	.	.	.	0	.
1	4215801	AAAAGAGAA.CTGCTGATT_R	T	C	.	.	NS=10;AF=0.233	GT	1	.	.	1	1	.	.	0	.	1	0	.	.	.	.	.	.	.	.	.	.	.	.	.	.	1	1	1	0	.
1	901733	AAAAGAGAA.CTTAATCAA_F	A	G	.	.	NS=3;AF=0.067	GT	.	.	.	.	.	.	.	1	.	.	0	.	.	.	.	.	.	.	.	.	.	.	.	.	.	.	.	.	1	.
1	1132315	AAAAGAGAA.GCCGCATGT_R	C	T	.	.	NS=28;AF=0.367	GT	1	1	1	1	1	.	1	0	1	1	0	0	0	0	0	0	0	0	0	0	0	0	0	0	0	1	1	1	0	.
1	1517352	AAAAGAGAA.TAATGAATA_F	G	A	.	.	NS=4;AF=0.033	GT	.	.	.	.	.	1	.	0	.	.	0	.	.	.	.	.	.	.	.	.	.	.	.	.	.	.	.	.	0	.
1	860959	AAAAGAGAA.TATGGCCTG_R	C	T	.	.	NS=4;AF=0.033	GT	1	.	.	.	.	.	.	0	.	.	0	.	.	.	.	.	.	.	.	.	.	.	.	.	.	.	.	.	0	.
1	2936921	AAAAGAGAA.TGCAGCGTT_R	A	T	.	.	NS=3;AF=0.033	GT	.	.	.	.	.	.	.	1	.	.	0	.	.	.	.	.	.	.	.	.	.	.	.	.	.	.	.	.	0	.
1	1589514	AAAAGAGAC.ATTGGTGAT_F	T	C	.	.	NS=10;AF=0.233	GT	.	.	.	.	.	.	.	0	.	.	0	.	.	.	.	1	1	1	1	1	.	.	1	1	.	.	.	.	0	.
1	3569776	AAAAGAGAC.GCAAAGGTT_R	C	T	.	.	NS=2;AF=0.033	GT	.	.	.	.	.	.	.	.	.	.	0	.	1	.	.	.	.	.	.	.	.	.	.	.	.	.	.	.	.	.
1	1494351	AAAAGAGAC.GGCATTAAA_F	C	T	.	.	NS=19;AF=0.033	GT	.	0	0	0	0	.	.	0	1	.	0	.	.	.	.	0	0	0	0	0	0	0	.	0	.	0	0	0	0	.
1	3232324	AAAAGAGAC.GTTGATTTC_R	C	G	.	.	NS=30;AF=0.300	GT	1	1	1	0	0	1	1	0	0	0	0	0	0	0	0	0	0	0	0	0	0	0	0	0	0	1	1	1	0	1
1	3078048	AAAAGAGAG.AAAAACCAT_F	C	T	.	.	NS=4;AF=0.067	GT	.	.	.	1	1	.	.	.	.	0	0	.	.	.	.	.	.	.	.	.	.	.	.	.	.	.	.	.	.	.
1	2572312	AAAAGAGAG.CCCTGAGCC_R	A	C,G	.	.	NS=17;AF=0.300,0.067	GT	.	2	2	.	.	.	.	0	.	.	0	.	.	.	.	1	1	1	1	1	1	1	1	1	.	0	0	0	0	.
1	1653576	AAAAGAGAG.CCGATCATG_F	G	A	.	.	NS=15;AF=0.200	GT	0	0	1	.	.	.	.	0	0	.	0	1	1	1	1	.	.	.	.	.	.	.	.	.	1	0	0	0	0	.
1	149541	AAAAGAGAG.CTGAAAAAA_R	A	G	.	.	NS=9;AF=0.100	GT	0	0	0	.	.	.	0	.	.	.	0	.	.	.	.	.	.	.	.	.	.	.	.	.	.	1	1	1	0	.
1	3828889	AAAAGAGAG.CTGCGTTTC_R	A	G	.	.	NS=25;AF=0.033	GT	0	0	0	0	0	.	1	.	0	.	0	0	0	0	0	0	0	0	0	0	0	0	0	0	0	0	.	0	0	.
1	4178285	AAAAGAGAG.CTGTACAGC_F	C	T	.	.	NS=26;AF=0.033	GT	0	0	0	.	.	.	0	0	0	0	0	0	0	0	0	0	0	0	0	0	0	0	0	0	0	0	0	1	0	.
1	988250	AAAAGAGAG.GAGGCGCTG_F	T	C	.	.	NS=11;AF=0.200	GT	.	.	.	.	.	.	.	0	.	1	0	1	1	1	1	.	.	.	.	.	.	.	.	.	1	.	0	0	0	.
1	2481849	AAAAGAGAG.TAGCCAAAC_F	A	G	.	.	NS=6;AF=0.100	GT	.	.	.	.	.	.	.	0	.	.	0	.	.	.	.	.	.	.	.	.	.	.	.	.	.	1	1	1	0	.
1	2658354	AAAAGAGAG.TTAGTGATG_R	C	T	.	.	NS=12;AF=0.033	GT	.	0	0	0	0	.	.	0	.	0	0	0	1	0	0	.	.	.	.	.	.	.	.	.	0	.	.	.	.	.
1	230983	AAAAGAGAG.TTTTTGCTG_F	C	T	.	.	NS=23;AF=0.267	GT	0	0	0	.	.	.	0	0	.	.	0	0	0	0	0	.	1	1	1	1	1	1	1	1	0	0	0	0	0	.
1	175125	AAAAGAGAT.AAAGTTAAC_F	T	C	.	.	NS=19;AF=0.300	GT	.	.	.	.	.	.	0	0	0	.	0	0	0	0	0	1	1	1	1	1	1	1	1	1	0	.	.	.	0	.
1	4007048	AAAAGAGAT.AAATAAGTC_F	G	A	.	.	NS=2;AF=0.033	GT	.	.	.	.	.	.	.	.	.	.	0	.	.	.	.	.	.	.	.	.	.	.	.	.	.	.	.	.	1	.
1	2780547	AAAAGAGAT.AACCAGCCG_R	A	G	.	.	NS=5;AF=0.067	GT	.	.	.	1	1	.	.	0	.	.	0	.	.	.	.	.	.	.	.	.	.	.	.	.	.	.	.	.	0	.
1	399994	AAAAGAGAT.CCCTTCCCG_R	A	G	.	.	NS=5;AF=0.033	GT	.	.	.	.	.	.	.	1	.	.	0	.	.	.	.	.	.	.	.	.	.	.	.	.	.	0	0	.	0	.
1	3320634	AAAAGAGAT.CCGCCGCCC_F	A	T	.	.	NS=4;AF=0.033	GT	1	.	.	.	.	.	.	0	.	.	0	.	.	.	.	.	.	.	.	.	.	.	.	.	.	.	.	.	0	.
1	2760249	AAAAGAGAT.CGCTTCCGT_F	C	T	.	.	NS=10;AF=0.133	GT	.	.	.	0	0	.	1	0	.	0	0	.	.	.	.	.	.	.	.	.	.	.	.	.	.	1	1	1	0	.
1	1813356	AAAAGAGAT.CGTGGGACT_R	A	T	.	.	NS=17;AF=0.067	GT	.	0	0	1	1	0	0	0	.	0	0	0	0	0	.	.	.	.	.	.	.	.	.	.	0	0	0	0	0	.
1	2234031	AAAAGAGAT.GAAAGCCTG_F	C	T	.	.	NS=19;AF=0.033	GT	0	0	0	0	0	.	0	0	1	0	0	0	0	0	0	.	.	.	.	.	.	.	.	.	0	0	0	0	0	.
1	2785040	AAAAGAGAT.GAAGACTAT_F	T	C	.	.	NS=22;AF=0.100	GT	.	0	0	1	1	.	0	0	0	1	0	0	0	0	0	.	0	.	0	0	0	0	0	0	0	.	.	.	0	.
1	3691120	AAAAGAGAT.GACTACGCC_R	G	A	.	.	NS=22;AF=0.033	GT	0	.	.	.	0	0	0	1	.	0	0	0	0	0	0	0	0	0	0	0	0	0	0	0	0	.	0	.	.	.
1	2605806	AAAAGAGAT.GCCCACGGG_F	C	T	.	.	NS=11;AF=0.233	GT	1	1	1	.	.	.	0	0	1	.	0	.	.	.	.	.	.	.	.	.	.	.	.	.	.	1	1	1	0	.
1	679798	AAAAGAGAT.GCGATTGTC_F	T	C	.	.	NS=5;AF=0.033	GT	0	.	.	.	.	.	.	0	.	1	0	.	.	.	.	.	.	.	.	.	.	.	.	.	.	.	.	.	0	.
1	82955	AAAAGAGAT.GCGTCGTTA_F	C	G	.	.	NS=5;AF=0.067	GT	.	1	1	.	.	.	.	0	.	.	0	.	.	.	.	.	.	.	.	.	.	.	.	.	.	.	.	.	0	.
1	3600984	AAAAGAGAT.GGCGAGTAT_R	A	G	.	.	NS=4;AF=0.033	GT	.	.	.	.	.	.	.	0	.	.	0	.	.	.	.	.	.	.	.	.	.	.	.	.	.	.	.	1	0	.
1	2784839	AAAAGAGAT.TACAGCAAA_F	T	C	.	.	NS=20;AF=0.233	GT	0	0	0	1	1	0	1	0	0	1	0	0	0	0	0	.	.	.	.	.	.	.	.	.	0	1	1	1	0	.
1	3936609	AAAAGAGCA.CAAAAACGA_R	C	G	.	.	NS=12;AF=0.100	GT	0	0	0	1	1	.	.	0	.	.	0	.	.	.	.	.	.	.	.	.	.	.	.	.	.	0	0	0	0	1
1	3417935	AAAAGAGCA.CAGTACTGG_F	G	A	.	.	NS=25;AF=0.033	GT	1	0	0	0	0	.	0	0	0	0	0	0	0	0	0	0	0	0	0	0	0	0	0	0	0	.	.	.	0	.
1	1490871	AAAAGAGCA.CCCGAGCTC_R	C	T	.	.	NS=6;AF=0.100	GT	.	.	.	.	.	.	.	0	.	.	0	.	.	.	.	.	.	.	.	.	.	.	.	.	.	1	1	1	0	.
1	1176797	AAAAGAGCA.CGCAATCAG_F	T	A,C	.	.	NS=21;AF=0.300,0.067	GT	0	0	0	.	.	.	2	0	0	.	0	.	.	.	.	1	1	1	1	1	1	1	1	1	.	0	0	0	0	2
1	2600315	AAAAGAGCA.CTGCTGGTG_F	A	G	.	.	NS=17;AF=0.133	GT	.	.	.	0	0	.	1	0	.	.	0	.	.	.	.	0	0	0	0	0	0	0	0	0	.	.	1	1	.	1
1	613262	AAAAGAGCA.GGCAAGATC_R	C	T	.	.	NS=4;AF=0.100	GT	.	.	.	.	.	.	.	.	.	.	0	.	.	.	.	.	.	.	.	.	.	.	.	.	.	1	1	1	.	.
1	2868740	AAAAGAGCC.AACATCGAC_R	C	G	.	.	NS=18;AF=0.033	GT	.	0	0	0	0	0	.	0	0	0	0	0	0	0	1	.	.	.	.	.	.	.	.	.	0	0	0	0	0	.
1	4659501	AAAAGAGCC.GAGCTGAAT_R	T	C	.	.	NS=8;AF=0.033	GT	.	.	.	0	0	1	.	0	0	0	0	.	.	.	.	.	.	.	.	.	.	.	.	.	.	.	.	.	0	.
1	3157851	AAAAGAGCC.GCGTAAAGG_R	C	T	.	.	NS=4;AF=0.033	GT	.	.	.	.	.	.	.	0	1	.	0	.	.	.	.	.	.	.	.	.	.	.	.	.	.	.	.	.	0	.
1	1726809	AAAAGAGCC.GGCGTTTCC_F	T	A,C	.	.	NS=4;AF=0.033,0.033	GT	.	.	.	.	.	.	.	1	.	.	0	.	.	.	.	.	.	.	.	.	.	.	.	.	.	.	.	2	0	.
1	2828988	AAAAGAGCC.TATAAACGC_R	C	A	.	.	NS=7;AF=0.033	GT	.	.	.	.	.	.	.	0	0	.	0	.	.	.	.	.	.	.	.	.	.	.	.	.	.	0	0	1	0	.
1	682124	AAAAGAGCG.CCGGATGCG_F	C	T	.	.	NS=4;AF=0.033	GT	.	.	.	.	.	.	.	0	.	.	0	.	.	.	.	.	.	.	.	.	.	.	.	.	.	.	.	.	0	1
1	3085161	AAAAGAGCG.CTGCATATT_F	C	T	.	.	NS=4;AF=0.033	GT	.	.	.	.	.	.	.	0	.	.	0	.	.	.	.	.	.	.	.	.	.	.	.	.	.	.	.	.	0	1
1	3436689	AAAAGAGCG.CTTGGAGCC_F	C	T	.	.	NS=17;AF=0.033	GT	0	0	0	0	0	.	.	0	0	0	0	0	0	1	0	.	.	.	.	.	.	.	.	.	0	0	0	0	.	.
1	1579876	AAAAGAGCG.GATGACCGC_F	C	T	.	.	NS=24;AF=0.033	GT	0	0	0	0	0	0	0	0	1	0	0	.	.	.	.	0	0	0	0	0	0	0	0	0	.	0	0	0	0	.
1	2297841	AAAAGAGCG.GGCTATTAA_R	T	A	.	.	NS=24;AF=0.600	GT	1	.	.	1	1	.	.	0	.	1	0	1	1	1	1	1	1	1	1	1	1	1	1	1	1	0	0	0	0	.
1	446066	AAAAGAGCG.TGCATCGTG_R	A	G	.	.	NS=10;AF=0.233	GT	.	.	.	.	.	.	1	0	.	.	0	1	1	1	1	.	.	.	.	.	.	.	.	.	1	.	.	.	0	1
1	3932523	AAAAGAGCT.AAGCCGCTG_R	C	G	.	.	NS=8;AF=0.167	GT	1	.	1	.	.	.	.	0	.	.	0	.	.	.	.	.	.	.	.	.	.	.	.	.	.	1	1	1	0	.
1	1402741	AAAAGAGCT.ATGACCTAC_R	C	G	.	.	NS=18;AF=0.033	GT	.	.	.	.	.	1	.	0	.	0	0	0	0	0	0	0	0	0	0	0	0	0	0	0	.	.	.	.	0	.
1	3663652	AAAAGAGCT.CAGCAGCTG_R	C	G	.	.	NS=26;AF=0.167	GT	0	0	0	0	0	.	0	0	0	.	0	1	1	1	1	0	0	0	0	0	0	0	0	0	1	0	0	.	0	.
1	2389596	AAAAGAGCT.CGCCGCCTG_F	C	G	.	.	NS=9;AF=0.033	GT	.	.	.	0	0	1	.	0	.	.	0	.	.	.	.	.	.	.	.	.	.	.	.	.	.	0	0	0	0	.
1	1911089	AAAAGAGCT.GAGCAGCGC_F	G	T	.	.	NS=4;AF=0.033	GT	.	.	.	.	.	1	.	0	.	.	0	.	.	.	.	.	.	.	.	.	.	.	.	.	.	.	.	.	0	.
1	2195282	AAAAGAGCT.GATTATCGT_R	C	G	.	.	NS=16;AF=0.033	GT	.	.	.	.	.	.	.	0	0	.	0	.	.	.	.	0	0	0	0	0	0	0	0	0	.	0	1	0	0	.
1	3332547	AAAAGAGCT.TATCAGATC_F	A	G,T	.	.	NS=19;AF=0.367,0.200	GT	2	2	2	2	2	.	2	1	.	1	0	.	.	.	.	1	1	1	1	1	1	1	1	0	.	.	.	.	1	.
1	4186410	AAAAGAGCT.TATTTACTG_F	G	C	.	.	NS=10;AF=0.100	GT	0	0	0	.	.	.	.	0	0	.	0	.	.	.	.	.	.	.	.	.	.	.	.	.	.	1	1	1	0	.
1	447548	AAAAGAGGA.AGCGTTGAA_F	C	G	.	.	NS=9;AF=0.200	GT	.	.	.	.	.	.	1	0	.	.	0	1	1	1	1	.	.	.	.	.	.	.	.	.	1	.	.	.	0	.
1	2186452	AAAAGAGGA.CGCCGCGTG_R	G	A	.	.	NS=13;AF=0.100	GT	.	0	0	0	0	.	0	1	1	1	0	.	.	.	.	.	.	.	.	.	.	.	.	.	.	0	0	0	0	.
1	2012213	AAAAGAGGA.CTTACCCTG_F	A	G	.	.	NS=27;AF=0.033	GT	0	0	0	0	.	1	0	0	0	0	0	0	0	0	0	0	0	0	0	0	0	0	0	.	0	0	0	0	0	.
1	2041495	AAAAGAGGA.GGCACTATG_F	T	C	.	.	NS=11;AF=0.267	GT	1	1	1	.	.	.	.	0	.	.	0	1	1	1	1	.	.	.	.	.	.	.	.	.	1	.	.	.	0	.
1	679651	AAAAGAGGA.TTCGATGTC_F	C	T	.	.	NS=3;AF=0.033	GT	.	1	.	.	.	.	.	.	.	.	0	.	.	.	.	.	.	.	.	.	.	.	.	.	.	.	.	.	0	.
1	1894370	AAAAGAGGC.AACCTGCTG_R	A	C	.	.	NS=8;AF=0.133	GT	1	1	1	.	1	.	.	0	0	.	0	.	.	.	.	.	.	.	.	.	.	.	.	.	.	.	.	.	0	.
1	3947100	AAAAGAGGC.AGTTTCACT_F	C	G	.	.	NS=7;AF=0.033	GT	0	0	0	.	.	.	.	0	1	.	0	.	.	.	.	.	.	.	.	.	.	.	.	.	.	.	.	.	0	.
1	345131	AAAAGAGGC.ATCAGCAGC_R	C	T	.	.	NS=4;AF=0.067	GT	0	.	.	.	.	.	.	.	.	.	0	.	.	.	.	.	.	.	.	.	.	.	.	.	.	.	.	1	1	.
1	2401736	AAAAGAGGC.CCCATCGCA_R	C	A,T	.	.	NS=6;AF=0.033,0.067	GT	2	1	2	.	.	.	.	0	.	.	0	.	.	.	.	.	.	.	.	.	.	.	.	.	.	.	.	.	0	.
1	119895	AAAAGAGGC.CGCGAGGCG_R	G	A,C	.	.	NS=15;AF=0.167,0.067	GT	1	2	2	0	0	.	1	0	.	0	0	0	.	0	.	.	.	.	.	.	.	.	.	.	.	1	1	1	0	.
1	4131951	AAAAGAGGC.CTGAAACAG_R	T	G	.	.	NS=12;AF=0.200	GT	0	.	.	.	.	.	1	0	0	.	0	1	1	1	1	.	.	.	.	.	.	.	.	.	1	0	.	.	0	.
1	206597	AAAAGAGGC.GACATGAAG_F	G	A	.	.	NS=11;AF=0.267	GT	.	.	.	.	.	.	.	0	.	.	0	.	.	.	.	.	1	1	1	1	1	1	1	1	.	.	.	.	0	.
1	4011019	AAAAGAGGC.GCTACCCTT_F	C	T	.	.	NS=26;AF=0.300	GT	0	0	0	0	0	.	0	0	.	0	0	0	0	0	0	1	1	1	1	1	1	1	1	1	0	.	0	0	0	.
1	3151318	AAAAGAGGC.GGAGGAGGA_F	G	T	.	.	NS=2;AF=0.033	GT	.	.	.	.	.	.	.	.	.	.	0	.	.	.	.	.	.	.	.	.	.	.	.	.	.	.	.	.	1	.
1	1334825	AAAAGAGGC.GGCAACATG_R	C	T	.	.	NS=21;AF=0.033	GT	0	0	0	0	0	0	0	0	0	0	0	0	0	0	0	.	.	.	.	.	.	.	.	.	0	0	0	1	0	0
1	2082656	AAAAGAGGC.GGTATCGCC_R	C	T	.	.	NS=8;AF=0.033	GT	0	.	.	0	0	.	.	0	.	.	0	.	.	.	.	.	.	.	.	.	.	.	.	.	.	0	1	.	0	.
1	2030623	AAAAGAGGC.GTAAGCGCG_F	A	T	.	.	NS=2;AF=0.033	GT	.	.	.	.	.	.	.	.	.	1	0	.	.	.	.	.	.	.	.	.	.	.	.	.	.	.	.	.	.	.
1	1405654	AAAAGAGGC.TCCAGCGTC_R	T	C	.	.	NS=5;AF=0.100	GT	.	.	.	1	1	.	.	.	.	1	0	.	.	.	.	.	.	.	.	.	.	.	.	.	.	.	.	.	0	.
1	2660524	AAAAGAGGC.TTAAACACG_F	C	T	.	.	NS=28;AF=0.233	GT	0	0	0	1	1	.	0	0	1	1	0	0	0	0	0	0	0	0	0	0	0	0	0	0	0	1	1	1	0	.
1	605026	AAAAGAGGC.TTCCCGAAA_R	G	T	.	.	NS=4;AF=0.033	GT	.	.	.	.	.	.	.	0	1	.	0	.	.	.	.	.	.	.	.	.	.	.	.	.	.	.	.	.	0	.
1	2020079	AAAAGAGGG.AAACCGTCG_F	G	C	.	.	NS=5;AF=0.067	GT	1	.	.	.	.	.	.	1	.	.	0	.	.	.	.	.	.	.	.	.	.	.	.	.	.	.	0	.	0	.
1	1540649	AAAAGAGGG.AAACTGCTG_R	C	G,T	.	.	NS=27;AF=0.033,0.600	GT	2	2	2	2	2	2	2	0	0	0	0	2	2	2	2	0	.	0	0	0	2	2	2	2	2	2	2	.	.	1
1	1005236	AAAAGAGGG.AACACCCTG_F	T	G	.	.	NS=2;AF=0.033	GT	.	.	.	.	.	.	.	1	.	.	0	.	.	.	.	.	.	.	.	.	.	.	.	.	.	.	.	.	.	.
1	2043786	AAAAGAGGG.AACGGCTTC_R	T	G	.	.	NS=3;AF=0.033	GT	.	.	.	.	.	.	.	.	.	1	0	.	.	.	.	.	.	.	.	.	.	.	.	.	.	.	.	.	0	.
1	2644843	AAAAGAGGG.ACGGTGACG_R	T	A	.	.	NS=6;AF=0.067	GT	.	.	.	1	1	.	.	0	.	.	0	.	.	.	.	.	.	.	.	.	.	.	0	.	.	.	.	.	0	.
1	3377483	AAAAGAGGG.ATCCACTGC_F	G	T	.	.	NS=13;AF=0.067	GT	.	.	.	0	0	0	.	0	1	0	0	0	1	0	0	.	.	.	.	.	.	.	.	.	0	.	.	.	0	.
1	339747	AAAAGAGGG.ATGAGCGAG_F	C	A	.	.	NS=18;AF=0.233	GT	.	.	.	1	1	.	.	0	1	1	0	1	.	.	1	0	.	0	0	0	0	0	0	0	1	.	.	.	0	.
1	1644054	AAAAGAGGG.ATGGAGCTG_R	A	C,G,T	.	.	NS=23;AF=0.033,0.633,0.033	GT	.	.	.	2	2	2	1	2	3	2	0	2	2	2	2	2	2	2	2	2	2	2	2	2	2	.	.	.	0	.
1	190213	AAAAGAGGG.ATTGATGCC_R	A	C,G,T	.	.	NS=13;AF=0.267,0.033,0.067	GT	1	3	3	.	.	2	1	1	.	.	0	1	1	1	1	.	.	.	.	.	.	.	.	.	1	.	.	.	0	.
1	751552	AAAAGAGGG.CAGCCGGGT_F	G	A	.	.	NS=10;AF=0.200	GT	1	1	1	1	1	.	0	0	.	1	0	.	.	.	.	.	.	.	.	.	.	.	.	.	.	.	.	.	0	.
1	2404395	AAAAGAGGG.GAAGGCGTG_F	G	A	.	.	NS=3;AF=0.067	GT	.	.	.	.	.	.	.	1	.	.	0	.	.	.	.	.	.	.	.	.	.	.	.	.	.	.	.	.	1	.
1	2860414	AAAAGAGGG.GCGCATCAC_R	G	C	.	.	NS=7;AF=0.133	GT	.	.	.	.	.	.	1	0	.	.	0	.	.	.	.	.	.	.	.	.	.	.	.	.	.	1	1	1	0	.
1	3901628	AAAAGAGGT.AAACCTGAA_F	G	T	.	.	NS=15;AF=0.100	GT	.	.	.	.	.	.	.	0	.	.	0	.	.	.	.	0	0	0	0	0	0	0	0	0	.	1	1	1	0	.
1	4194540	AAAAGAGGT.ATGACCCGC_F	C	A,G	.	.	NS=15;AF=0.067,0.033	GT	.	.	.	1	1	0	.	.	2	.	0	.	.	.	.	0	0	0	0	0	0	0	0	0	.	.	.	.	0	.
1	693460	AAAAGAGGT.GTTAACCGT_R	A	C	.	.	NS=21;AF=0.400	GT	0	0	0	0	0	.	0	.	0	0	0	1	1	1	1	1	1	1	1	1	1	1	1	.	.	.	.	.	.	.
1	2145386	AAAAGAGGT.TCCGTGCGG_R	G	C	.	.	NS=10;AF=0.233	GT	.	.	.	.	.	.	.	0	.	.	0	.	.	.	.	1	1	1	1	1	.	.	1	1	.	.	.	.	0	.
1	4173443	AAAAGAGTA.CTCGATGCC_R	A	G	.	.	NS=20;AF=0.333	GT	0	0	0	.	.	1	0	0	1	.	0	.	.	.	.	1	1	.	1	1	1	1	1	1	.	0	0	0	0	.
1	2756122	AAAAGAGTA.GCCTACTGG_F	T	C	.	.	NS=10;AF=0.167	GT	.	.	.	.	.	0	1	.	.	.	0	1	0	1	1	.	.	.	.	.	.	.	.	.	1	.	.	.	0	0
1	4115108	AAAAGAGTA.GGTTTCGAA_F	C	T	.	.	NS=6;AF=0.033	GT	0	0	0	.	.	.	.	.	1	.	0	.	.	.	.	.	.	.	.	.	.	.	.	.	.	.	.	.	0	.
1	2248570	AAAAGAGTA.TAAATAAGA_F	T	C	.	.	NS=14;AF=0.300	GT	.	0	0	1	1	.	.	0	.	1	0	1	1	.	.	.	.	.	.	.	.	.	.	.	1	1	1	1	0	.
1	2244524	AAAAGAGTA.TCCCAGAAT_F	G	A	.	.	NS=2;AF=0.033	GT	.	.	.	.	.	.	.	1	.	.	0	.	.	.	.	.	.	.	.	.	.	.	.	.	.	.	.	.	.	.
1	4453333	AAAAGAGTG.CTCGCGACG_F	C	A,T	.	.	NS=15;AF=0.033,0.267	GT	.	.	.	2	2	.	.	0	2	2	0	2	1	2	2	.	.	.	.	.	.	.	.	.	2	0	0	0	0	.
1	2575844	AAAAGAGTG.GAAGCCATT_F	T	C	.	.	NS=18;AF=0.100	GT	0	0	0	0	0	.	0	.	0	0	0	0	0	0	0	.	.	.	.	.	.	.	.	.	0	1	1	1	0	.
1	2899471	AAAAGAGTG.GTGGCGCTT_R	C	T	.	.	NS=20;AF=0.033	GT	1	0	0	0	0	.	0	0	.	0	0	.	.	.	.	0	.	.	0	0	0	0	0	0	.	0	0	0	0	.
1	3561665	AAAAGAGTT.ACCAAAGAG_F	C	T	.	.	NS=26;AF=0.033	GT	0	.	.	0	0	0	0	0	.	0	0	0	0	0	0	1	0	0	0	0	0	0	0	0	0	0	0	0	0	.
1	1095974	AAAAGAGTT.CAGACTAAT_F	T	C	.	.	NS=3;AF=0.033	GT	.	.	.	.	.	.	.	0	.	.	0	.	.	.	.	.	.	.	.	.	.	.	.	.	.	.	.	.	1	.
1	4495055	AAAAGAGTT.TCGACGCCG_R	G	T	.	.	NS=13;AF=0.067	GT	0	1	1	0	0	.	.	0	0	0	0	.	.	.	.	.	.	.	.	.	.	.	.	.	.	0	0	0	0	.
1	695177	AAAAGAGTT.TCTCAGGAT_R	A	G	.	.	NS=11;AF=0.300	GT	1	1	.	.	.	1	1	1	1	.	0	.	.	.	.	.	.	.	.	.	.	.	.	.	.	1	1	1	0	.
1	738681	AAAAGATAA.GACAGCCTG_F	T	C	.	.	NS=18;AF=0.567	GT	1	1	1	.	.	.	.	.	1	.	0	.	.	.	.	1	1	1	1	1	1	1	1	1	.	1	1	1	1	.
1	4457775	AAAAGATAC.AACACCGGC_R	G	A	.	.	NS=14;AF=0.067	GT	0	1	1	.	.	.	.	0	.	.	0	.	.	.	.	0	0	0	0	0	0	0	0	0	.	.	.	.	.	.
1	424230	AAAAGATAG.CAGTCATTG_F	T	C	.	.	NS=11;AF=0.233	GT	.	.	.	.	.	.	.	0	0	.	0	.	.	.	.	1	1	1	.	.	1	1	1	1	.	.	.	.	0	.
1	3219912	AAAAGATAT.CCCGATCTG_R	A	G	.	.	NS=19;AF=0.300	GT	1	.	.	.	.	.	1	0	1	.	0	1	1	1	1	0	0	.	.	.	0	0	0	0	1	0	.	1	0	.
1	2437685	AAAAGATCA.CCCCGCCAG_F	G	A	.	.	NS=8;AF=0.067	GT	.	.	.	.	.	.	.	0	.	.	0	0	1	0	0	.	.	.	.	.	.	.	.	.	1	.	.	.	0	.
1	1895239	AAAAGATCA.GGCGCTCTG_F	T	G	.	.	NS=3;AF=0.033	GT	.	.	.	.	.	.	.	1	.	.	0	.	.	.	.	.	.	.	.	.	.	.	.	.	.	.	.	.	0	.
1	3515071	AAAAGATCC.AAAACGCGT_R	C	G	.	.	NS=26;AF=0.100	GT	0	0	0	.	.	0	0	0	0	.	0	0	0	0	0	0	0	0	0	0	0	0	0	0	0	1	1	1	0	.
1	861037	AAAAGATCC.AACCACATT_R	T	C	.	.	NS=10;AF=0.100	GT	0	.	.	.	.	0	0	0	0	.	0	.	.	.	.	.	.	.	.	.	.	.	.	.	.	1	1	1	0	.
1	819878	AAAAGATCC.ACCGATCTG_R	C	G,T	.	.	NS=9;AF=0.033,0.167	GT	.	.	.	.	.	.	.	0	1	.	0	.	.	.	.	2	2	2	2	2	.	.	.	.	.	.	.	.	0	.
1	1044300	AAAAGATCC.ATCACCTTC_R	C	G	.	.	NS=23;AF=0.300	GT	0	0	0	.	.	0	0	.	0	.	0	0	0	0	0	1	1	1	1	1	1	1	1	1	0	.	.	.	0	0
1	1202704	AAAAGATCC.CAGAATCGG_F	G	A	.	.	NS=5;AF=0.033	GT	.	.	.	0	.	.	.	0	.	.	0	.	.	1	.	.	.	.	.	.	.	.	.	.	.	.	.	.	0	.
1	3320703	AAAAGATCC.GGCAGCGAG_R	G	C	.	.	NS=12;AF=0.267	GT	1	1	1	1	1	.	0	0	.	.	0	.	1	1	.	.	.	.	.	.	.	.	.	.	1	.	.	.	0	.
1	1600059	AAAAGATCC.TATGCCGTC_F	C	G	.	.	NS=3;AF=0.033	GT	.	.	.	.	.	.	.	1	.	.	0	.	.	.	.	.	.	.	.	.	.	.	.	.	.	.	.	.	0	.
1	833745	AAAAGATCC.TCTGCCACC_F	T	G	.	.	NS=17;AF=0.267	GT	0	0	0	.	.	.	1	0	.	.	0	.	.	.	.	1	1	1	1	1	1	1	.	.	.	0	0	0	0	.
1	869243	AAAAGATCG.AAAACGCAG_R	A	G	.	.	NS=13;AF=0.100	GT	1	.	1	0	0	.	.	0	.	1	0	0	0	0	0	.	.	.	.	.	.	.	.	.	0	.	.	.	0	.
1	2562914	AAAAGATCG.CAGGAGCTG_F	T	C	.	.	NS=7;AF=0.033	GT	.	.	.	0	0	.	0	0	.	1	0	.	.	.	.	.	.	.	.	.	.	.	.	.	.	.	.	.	0	.
1	288812	AAAAGATCG.CGACGATCT_F	A	C	.	.	NS=5;AF=0.067	GT	.	.	.	.	.	.	.	0	.	.	0	.	.	.	.	.	.	.	.	.	.	.	.	.	.	1	1	.	0	.
1	2620216	AAAAGATCT.ATTGGCTGG_F	G	T	.	.	NS=15;AF=0.033	GT	.	0	0	0	0	1	0	0	.	0	0	0	0	0	0	.	.	.	.	.	.	.	.	.	0	.	.	.	0	.
[truncated: 318,553 more rows]
