# Supplementary material for: Complete genome of Enterobacter sichuanensis strain SGAir0282 isolated from air in Singapore
Source: Gut Pathog. 2020 Feb 27;12:12. doi: 10.1186/s13099-020-00350-z (PMC7045367; doi:10.1186/s13099-020-00350-z)
Supplement: Supplementary file 4 — Additional file 4: Table S3. Pairwise distance matrix showing distance between genomes on the Neighbour-joining tree. k-mer based kSNP3 analysis was performed on our dataset. k-mer was set at 19 nucleotides. Genome sequence of SGAir0282 was used as reference. [file 13099_2020_350_MOESM4_ESM.xlsx]

## Sheet: Sheet1
	EasburiaeATCC35953	EasburiaeCAV1043	EasburiaeENIPBJ_CG1	Ebugandensis220	EbugandensisEB_247	EcancerogenusCR_Eb1	EchengduensisWCHECl-C4	EcloacaeA1137	EcloacaeCZ_1	EcloacaeMBRL1077	EcloacaeSGAir0282	EkobeiC16	EkobeiDSM13645	EkobeiEB_P8_L5_0119	EkobeiWCHEK045523	EludwigiiAA4	EludwigiiEN-119	EludwigiiEcWSU1	EludwigiiI140	EludwigiiI42	EludwigiiJP6	EludwigiiJP9	EludwigiiP101	EludwigiiUW5	EnterobacterODB01	EroggenkampiiDSM16690	EroggenkampiiECY546	EroggenkampiiFDAARGOS_523	EsichuanensisWCHECL1597	LadecarboxylataUSDA_ARS_USMARC_60222
EasburiaeATCC35953	0	435433	431973	857268	855751	825656	726863	848218	795699	834755	842776	883209	870953	868388	875930	946979	943923	945173	945852	945853	942150	942263	948852	948112	871975	763813	766714	760820	844270	808017
EasburiaeCAV1043	435433	0	182811	874078	873820	847769	740160	863280	815903	852529	858265	895854	893740	888093	897287	967765	964092	965340	965191	965192	962327	962466	968168	966417	888568	767907	771823	764303	863923	830318
EasburiaeENIPBJ_CG1	431973	182811	0	865187	864024	835319	735522	854011	804519	842665	850130	889538	884171	874643	886507	955435	952222	952838	953049	953050	949544	949690	955971	956014	876349	760432	762831	755406	854452	815835
Ebugandensis220	857268	874078	865187	0	188454	793262	850758	903360	825538	513602	897907	842151	832694	831273	840198	933343	931174	930002	930601	930605	930754	930888	936622	936466	830811	853847	858482	855317	903242	776304
EbugandensisEB_247	855751	873820	864024	188454	0	790877	847692	900471	823905	508964	898019	842644	832107	829723	836994	932773	929130	930210	930073	930077	928973	929128	935172	935568	829910	852616	854735	851790	901098	773473
EcancerogenusCR_Eb1	825656	847769	835319	793262	790877	0	782616	785832	658768	784944	781527	767664	752684	750636	762652	726347	720580	722981	723216	723220	720061	720159	727012	726108	740676	831012	830263	818977	784158	485551
EchengduensisWCHECl-C4	726863	740160	735522	850758	847692	782616	0	841981	795219	831432	841650	813235	809215	806211	808816	926173	922368	923884	923574	923575	920599	920707	925777	926848	803417	756297	757701	752826	844991	763206
EcloacaeA1137	848218	863280	854011	903360	900471	785832	841981	0	772465	893975	237020	883468	874521	871393	877897	906247	902669	904387	904322	904326	901231	901337	906380	906896	867262	828109	827308	820760	240709	756186
EcloacaeCZ_1	795699	815903	804519	825538	823905	658768	795219	772465	0	816423	766631	788426	776292	775176	785348	770211	767393	768506	768366	768367	765213	765311	771163	771307	767633	819253	817417	809240	770117	616267
EcloacaeMBRL1077	834755	852529	842665	513602	508964	784944	831432	893975	816423	0	888691	817339	808032	805460	812644	926099	921933	924314	923267	923271	922752	922908	929079	928722	806493	854761	854100	853028	893908	772069
EcloacaeSGAir0282	842776	858265	850130	897907	898019	781527	841650	237020	766631	888691	0	881146	870843	870124	877516	899118	894420	896711	897298	897302	893324	893415	899443	900369	864587	822089	824697	819412	192456	749377
EkobeiC16	883209	895854	889538	842151	842644	767664	813235	883468	788426	817339	881146	0	155350	151648	147080	900104	897885	895869	897657	897661	895470	895615	901283	902054	173333	894807	894292	887911	885208	745481
EkobeiDSM13645	870953	893740	884171	832694	832107	752684	809215	874521	776292	808032	870843	155350	0	148063	157707	887484	884847	884171	885780	885781	882578	882732	889308	888914	151410	884186	883412	878082	873230	727573
EkobeiEB_P8_L5_0119	868388	888093	874643	831273	829723	750636	806211	871393	775176	805460	870124	151648	148063	0	150204	884669	881660	882454	882860	882861	879575	879708	885530	885724	180758	882631	881790	872550	870525	726436
EkobeiWCHEK045523	875930	897287	886507	840198	836994	762652	808816	877897	785348	812644	877516	147080	157707	150204	0	897392	893525	894776	895258	895259	890962	891110	897039	898138	178839	892251	889471	883646	879134	739133
EludwigiiAA4	946979	967765	955435	933343	932773	726347	926173	906247	770211	926099	899118	900104	887484	884669	897392	0	163898	148109	142265	142264	143227	143132	152091	147747	878015	954168	954774	944225	904023	692477
EludwigiiEN-119	943923	964092	952222	931174	929130	720580	922368	902669	767393	921933	894420	897885	884847	881660	893525	163898	0	163960	163902	163899	159696	159617	163764	164584	873443	952715	950482	941961	899398	684114
EludwigiiEcWSU1	945173	965340	952838	930002	930210	722981	923884	904387	768506	924314	896711	895869	884171	882454	894776	148109	163960	0	144180	144180	146318	146208	153317	145994	873735	951568	953792	941753	901625	689548
EludwigiiI140	945852	965191	953049	930601	930073	723216	923574	904322	768366	923267	897298	897657	885780	882860	895258	142265	163902	144180	0	13	143045	142919	151283	144849	875727	952692	953525	942611	901742	689390
EludwigiiI42	945853	965192	953050	930605	930077	723220	923575	904326	768367	923271	897302	897661	885781	882861	895259	142264	163899	144180	13	0	143040	142914	151280	144844	875728	952690	953523	942609	901742	689394
EludwigiiJP6	942150	962327	949544	930754	928973	720061	920599	901231	765213	922752	893324	895470	882578	879575	890962	143227	159696	146318	143045	143040	0	704	145124	141800	872215	949108	950273	938751	898498	686250
EludwigiiJP9	942263	962466	949690	930888	929128	720159	920707	901337	765311	922908	893415	895615	882732	879708	891110	143132	159617	146208	142919	142914	704	0	145028	141656	872382	949180	950352	938817	898616	686368
EludwigiiP101	948852	968168	955971	936622	935172	727012	925777	906380	771163	929079	899443	901283	889308	885530	897039	152091	163764	153317	151283	151280	145124	145028	0	150890	878149	955361	956792	945233	903784	693028
EludwigiiUW5	948112	966417	956014	936466	935568	726108	926848	906896	771307	928722	900369	902054	888914	885724	898138	147747	164584	145994	144849	144844	141800	141656	150890	0	879193	954553	957317	945575	905523	692866
EnterobacterODB01	871975	888568	876349	830811	829910	740676	803417	867262	767633	806493	864587	173333	151410	180758	178839	878015	873443	873735	875727	875728	872215	872382	878149	879193	0	880308	880003	871164	867401	710797
EroggenkampiiDSM16690	763813	767907	760432	853847	852616	831012	756297	828109	819253	854761	822089	894807	884186	882631	892251	954168	952715	951568	952692	952690	949108	949180	955361	954553	880308	0	228422	235573	825205	809373
EroggenkampiiECY546	766714	771823	762831	858482	854735	830263	757701	827308	817417	854100	824697	894292	883412	881790	889471	954774	950482	953792	953525	953523	950273	950352	956792	957317	880003	228422	0	243416	825802	809208
EroggenkampiiFDAARGOS_523	760820	764303	755406	855317	851790	818977	752826	820760	809240	853028	819412	887911	878082	872550	883646	944225	941961	941753	942611	942609	938751	938817	945233	945575	871164	235573	243416	0	817802	795788
EsichuanensisWCHECL1597	844270	863923	854452	903242	901098	784158	844991	240709	770117	893908	192456	885208	873230	870525	879134	904023	899398	901625	901742	901742	898498	898616	903784	905523	867401	825205	825802	817802	0	753517
LadecarboxylataUSDA_ARS_USMARC_60222	808017	830318	815835	776304	773473	485551	763206	756186	616267	772069	749377	745481	727573	726436	739133	692477	684114	689548	689390	689394	686250	686368	693028	692866	710797	809373	809208	795788	753517	0
